# Supplementary material for: Comparative analysis of rhizosphere soil between three plantation types in Karst Rocky Desertification area by widely targeted metabolomics
Source: PeerJ. 2025 Mar 31;13:e19131. doi: 10.7717/peerj.19131 (PMC11967436; doi:10.7717/peerj.19131)
Supplement: Supplemental Information 13 [file peerj-13-19131-s013.xlsx]

## Sheet: Metabolite primary and secondar
ID	name	mz	rt	exact_mass	ppm	formula	precursor_type	class	sub_class	KEGG	KEGG_Pathway	CAS	hmdb	library	level	posneg	XC_1	XC_2	XC_3	XC_4	XC_5	XC_6	XC_7	XC_8	YT_9	YT_10	YT_11	YT_12	YT_13	YT_14	YT_15	YT_16	GP_17	GP_18	GP_19	GP_20	GP_21	GP_22	GP_23	GP_24
M156T190	N-Methylethanolaminium phosphate	156.039	190	155.035	17.7901	C3H10NO4P	[M+H]+	Organic oxides	Amines	C01210	Lipid metabolism		HMDB0060173	MetaDNA	2	pos	1.57383e+06	1.88189e+06	2.02987e+06	1.66854e+06	696506	665256	669560	669209	1.48786e+06	1.35167e+06	587819	1.01311e+06	1.6631e+06	1.18586e+06	1.31055e+06	659978	1.81199e+06	1.61715e+06	1.48038e+06	1.46287e+06	1.34537e+06	558444	1.20411e+06	1.81785e+06
M182T312	2-Methyl-3-hydroxy-5-formylpyridine-4-carboxylate	182.045	312.1	181.037	0.131836	C8H7NO4	[M+H]+	Pyridines and derivatives	Pyridinecarboxylic acids and derivatives	C06050	Metabolism of cofactors and vitamins; Global and overview maps		HMDB0006954	MetaDNA	2	pos	724201	640657	642441	674236	614619	683094	625895	639476	644232	669008	959459	698415	698788	675821	734330	626269	683500	657698	675652	636228	747234	699654	678154	688662
M227T471	Deoxycytidine	227.092	471.2	227.091	5.72459	C9H13N3O4	[M]+	Azacyclic compounds	Alcohols and polyols	C00881	Membrane transport; Global and overview maps; Nucleotide metabolism	951-77-9	HMDB0000014	MetaDNA	2	pos	145940	112943	279840	205572	1.93546e+06	153784	956910	2.27784e+06	77233.5	57025.7	113428	2.02595e+06	2.31359e+06	283860	155194	2.82096e+06	455898	314740	130173	453269	59420.7	137746	111994	295533
M389T248	3alpha,7alpha-Dihydroxy-12-oxo-5beta-cholanate	389.257	248.3	406.272	19.9504	C24H38O5	[M+H-H2O]+	Carboxylic acids and derivatives	Alcohols and polyols	C01292		2458-08-4		MetaDNA	2	pos	1.31054e+06	1.19754e+06	1.4299e+06	1.43242e+06	1.64452e+06	1.54186e+06	1.60774e+06	1.107e+06	1.71825e+06	1.62599e+06	1.59755e+06	1.33358e+06	1.54467e+06	1.48494e+06	1.54361e+06	1.18977e+06	1.85591e+06	1.18552e+06	1.51686e+06	1.30719e+06	1.01779e+06	1.10213e+06	921931	1.29709e+06
M184T51	Choline sulfate	184.065	50.8	183.056	3.93342	C5H13NO4S	[M+H]+	Organic oxides	Alkyl sulfates	C00919	Membrane transport	4858-96-2		MetaDNA	2	pos	1.0972e+06	4.4049e+06	7.19434e+06	9.82892e+06	4.93562e+06	3.42075e+06	4.30773e+06	3.70747e+06	2.04317e+06	3.51298e+06	3.99732e+06	4.42763e+06	2.42106e+06	5.70058e+06	8.12431e+06	5.26879e+06	3.13965e+06	4.8633e+06	4.22172e+06	5.11218e+06	1.89819e+07	7.79071e+06	2.05254e+06	3.64304e+06
M440T620	Oleanolic aldehyde	440.36	620.3	440.365	11.8084	C30H48O2	[M]+			C20946				MetaDNA	2	pos	3.98338e+07	3.68976e+07	3.4061e+07	5.65114e+07	9.16812e+06	2.36651e+07	1.19059e+07	1.81624e+07	2.42243e+07	4.04911e+07	2.34947e+07	3.00682e+07	1.43621e+07	5.74821e+06	1.78991e+07	1.89926e+07	8.91831e+07	1.34599e+08	8.51946e+07	1.30816e+08	3.91768e+07	3.86883e+07	3.24929e+07	4.1858e+07
M183T269	L-Iditol	183.092	268.6	182.079	29.6254	C6H14O6	[M+H]+	Organooxygen compounds	Alcohols and polyols	C01507		488-45-9	HMDB0011632	MetaDNA	2	pos	1.02585e+06	1.07029e+06	1.09086e+06	1.07853e+06	1.00223e+06	1.08134e+06	1.04145e+06	966492	1.00983e+06	1.0351e+06	1.05009e+06	1.04827e+06	1.02998e+06	1.09006e+06	1.06312e+06	1.10277e+06	1.03576e+06	1.06517e+06	1.08665e+06	1.07707e+06	1.09349e+06	1.07844e+06	1.07676e+06	1.1302e+06
M600T607_2	Neoxanthin	600.428	607	600.418	16.322	C40H56O4	[M]+	Epoxides	Alcohols and polyols	C08606	Global and overview maps; Metabolism of terpenoids and polyketides	14660-91-4/30743-41-0	HMDB0003020	MetaDNA	2	pos	7.40307e+06	9.01606e+08	1.49888e+07	1.05325e+06	2.03087e+06	2.20383e+07	3.04302e+07	322947	99609.4	2.18586e+07	1.2644e+06	3.1007e+07	1.30777e+06	125493	1.92456e+07	2.09773e+07	6.03912e+06	208107	262524	2.99269e+07	108981	3.04414e+07	2.05671e+07	1.6753e+06
M449T512	Deoxycholic acid glycine conjugate	449.324	512	449.314	22.2561	C26H43NO5	[M]+	Carboxylic acids and derivatives	Alcohols and polyols	C05464		360-65-6	HMDB0000631	MetaDNA	2	pos	307385	349859	390247	320192	105766	406744	504596	303641	343452	479131	345524	304809	335255	372819	91771	308848	317866	532935	256669	360344	604619	305096	352177	375865
M468T527	Lupeol acetate	468.386	527.4	468.397	21.9899	C32H52O2	[M]+	Carboxylic acids and derivatives	Carbonyl compounds	C08630		1617-68-1		MetaDNA	2	pos	4.20486e+06	3.232e+06	2.73116e+06	2.97489e+06	2.06691e+06	2.18923e+06	2.49734e+06	2.38074e+06	308631	788329	236944	894775	1.16207e+06	1.41643e+06	1.15672e+06	194270	2.84717e+06	2.22326e+06	1.89344e+06	2.80482e+06	3.12304e+06	2.71012e+06	2.17158e+06	2.73824e+06
M584T663	Capsanthin	584.42	662.6	584.423	4.44883	C40H56O3	[M]+	Organic oxides	Acryloyl compounds	C08584	Metabolism of terpenoids and polyketides	465-42-9	HMDB0036590	MetaDNA	2	pos	1.29303e+06	83382.4	678937	15928	1.26083e+06	126465	2.59402e+06	144829	528024	1.60647e+06	118739	59601.3	37813.5	41530.2	45387.9	100628	1.64083e+06	39312.1	33944.5	531601	11830.1	271924	814923	1.56488e+06
M299T565	Ricinoleic acid	299.258	565.4	298.251	0.0801983	C18H34O3	[M+H]+	Carboxylic acids and derivatives	Alcohols and polyols	C08365		141-22-0	HMDB0034297	MetaDNA	2	pos	88821.1	210832	127342	580013	884225	329521	121973	4.05888e+06	2.12558e+07	3.16806e+07	2.60613e+07	3.52287e+07	3.35307e+07	3.73427e+07	3.28794e+07	2.78137e+07	1.12001e+07	2.26703e+07	92536.1	98970.1	65606	227242	5.8974e+06	1.22651e+07
M103T40	2-Ketobutyric acid	102.971	40.3	102.032	0.332173	C4H6O3	[M+H]+	Keto acids and derivatives	Short-chain keto acids and derivatives	C00109	Carbohydrate metabolism; Amino acid metabolism; Global and overview maps	600-18-0	HMDB0000005	BioDeepDB	2	pos	1.85969e+06	2.09257e+06	3.34524e+06	1.97743e+06	1.89875e+06	2.21436e+06	1.796e+06	3.84118e+06	746611	1.63667e+06	2.16613e+06	629778	2.15238e+06	1.91e+06	1.87134e+06	1.78029e+06	1.82617e+06	1.92377e+06	2.18788e+06	2.19217e+06	1.6239e+06	3.51938e+06	1.60855e+06	1.79698e+06
M102T372	Isovaleric acid	102.035	372.3	102.068	2.39954	C5H10O2	[M]+	Fatty Acyls	Fatty acids and conjugates	C08262	Chemical structure transformation maps; Global and overview maps; Digestive system	503-74-2	HMDB0000718	BioDeepDB	2	pos	4.60681e+07	4.17755e+07	4.634e+07	6.20641e+07	2.17261e+07	1.88201e+07	1.97363e+07	1.54422e+07	1.88624e+07	2.39501e+07	2.38791e+07	2.11918e+07	6.17029e+06	6.30619e+06	4.4002e+06	2.20877e+07	4.33323e+07	3.83827e+07	3.47432e+07	3.43409e+07	2.3027e+07	2.99738e+07	2.8238e+07	2.35945e+07
M103T493	Phenylacetaldehyde	103.051	493.1	120.058	8.09309	C8H8O	[M+H-H2O]+	Benzene and substituted derivatives	Phenylacetaldehydes	C00601	Amino acid metabolism; Xenobiotics biodegradation and metabolism; Global and overview maps	122-78-1	HMDB0006236	BioDeepDB	2	pos	9.03405e+06	2.18302e+06	7.72355e+06	8.64579e+06	3.21032e+06	3.23767e+06	2.54278e+06	2.14239e+07	1.15583e+07	1.90498e+07	2.38163e+06	1.60323e+07	1.47209e+07	1.36725e+07	1.21737e+07	3.09013e+07	2.1114e+07	3.36294e+06	2.44949e+06	3.29091e+06	2.02556e+06	2.91345e+06	2.21651e+06	2.30691e+06
M104T636	Dimethylglycine	104.108	636	103.063	8.50157	C4H9NO2	[M+H]+	Carboxylic acids and derivatives	Amino acids, peptides, and analogues	C01026	Amino acid metabolism; Global and overview maps	1118-68-9	HMDB0000092	BioDeepDB	2	pos	2.08103e+08	2.17766e+08	2.1651e+08	7.87333e+07	2.19136e+08	3.75774e+08	2.62129e+07	2.74586e+08	2.07372e+08	1.75325e+08	2.04498e+08	1.31917e+08	6.29059e+07	6.31369e+07	2.69855e+08	5.32662e+07	2.1028e+08	2.76236e+08	1.97311e+08	3.69704e+08	1.83196e+08	5.77582e+07	2.66466e+08	7.0775e+07
M109T306	m-Cresol	109.102	306.2	108.058	2.18436	C7H8O	[M+H]+	Phenols	Cresols	C01467	Xenobiotics biodegradation and metabolism; Global and overview maps	108-39-4	HMDB0002048	BioDeepDB	2	pos	3.59243e+06	8.33613e+06	3.17582e+06	3.84139e+06	3.13999e+06	2.19626e+06	3.38941e+06	7.99477e+06	2.68702e+06	2.63438e+06	3.01172e+06	3.78694e+06	2.93999e+06	2.19518e+06	1.16831e+07	3.66211e+06	3.07113e+06	1.32441e+07	4.44364e+06	4.49601e+06	5.77906e+06	5.51932e+06	2.39114e+06	1.46052e+06
M110T372	Catechol	110.019	372.2	110.037	12.4815	C6H6O2	[M]+			C00090	Xenobiotics biodegradation and metabolism; Global and overview maps	120-80-9 / 12385-08-9		BioDeepDB	2	pos	6.13587e+07	2.66567e+07	1.26903e+08	8.11234e+07	5.11115e+07	3.99506e+07	2.62917e+07	9.70375e+07	5.07015e+07	5.18104e+07	3.60312e+07	5.31413e+07	1.20216e+07	1.15138e+07	2.82482e+07	2.83941e+07	3.86706e+07	5.39243e+07	1.20131e+07	4.60416e+07	1.76709e+07	8.96124e+07	1.3448e+07	3.18143e+07
M110T402	Hydroquinone	110.019	402.3	110.037	8.66074	C6H6O2	[M]+	Phenols	Benzenediols	C00530	Amino acid metabolism; Xenobiotics biodegradation and metabolism; Global and overview maps	123-31-9	HMDB0002434	BioDeepDB	2	pos	2.2916e+07	2.13308e+07	2.56487e+07	4.79825e+07	9.93088e+06	3.26542e+07	8.83652e+06	1.20489e+06	3.6839e+07	3.75215e+07	5.04518e+07	2.30217e+07	3.69494e+07	2.61485e+07	2.17886e+07	4.0875e+07	2.27095e+07	1.0051e+07	2.03988e+07	4.50867e+07	2.38045e+07	4.63413e+07	6.01666e+06	7.98463e+06
M111T600	Pyrrole-2-carboxylic acid	111.019	600.4	111.032	7.5733	C5H5NO2	[M]+	Pyrroles	Pyrrole carboxylic acids and derivatives	C05942	Amino acid metabolism	634-97-9	HMDB0004230	BioDeepDB	2	pos	5.02183e+08	4.01916e+08	5.10778e+08	6.31474e+08	2.16259e+08	1.91528e+08	2.28905e+08	1.64992e+08	1.91088e+08	2.28087e+08	2.66656e+08	2.30713e+08	5.56492e+07	4.91119e+07	1.08443e+09	2.06761e+08	4.71786e+08	3.90013e+08	3.37046e+08	3.94746e+08	2.3321e+08	2.92907e+08	2.75573e+08	2.69091e+08
M113T72	Creatinine	113.035	72.2	113.059	0.0881227	C4H7N3O	[M]+	Carboxylic acids and derivatives	Amino acids, peptides, and analogues	C00791	Amino acid metabolism; Global and overview maps	60-27-5	HMDB0000562	BioDeepDB	2	pos	5.65933e+06	5.7457e+06	5.59187e+06	5.2742e+06	4.87519e+06	5.78334e+06	6.1359e+06	3.6983e+06	5.99874e+06	6.48505e+06	7.01256e+06	6.28297e+06	7.46403e+06	6.45918e+06	1.11662e+07	878576	431359	1.00379e+07	6.02044e+06	6.80619e+06	6.61888e+06	6.35914e+06	6.98319e+06	6.87277e+06
M130T254	Ketoleucine	130.159	253.7	130.063	2.98218	C6H10O3	[M]+	Keto acids and derivatives	Short-chain keto acids and derivatives	C00233	Amino acid metabolism; Biosynthesis of other secondary metabolites; Global and overview maps	816-66-0	HMDB0000695	BioDeepDB	2	pos	3.86141e+06	2.62907e+06	3.49285e+06	2.06615e+06	2.66485e+06	1.85237e+07	2.86051e+06	954202	1.0115e+07	2.9303e+06	1.6933e+06	2.45975e+06	2.51294e+06	1.30164e+07	3.0921e+06	2.11146e+06	2.38823e+06	6.13182e+06	2.32259e+06	2.56496e+06	8.07282e+06	2.3191e+06	2.02362e+06	1.16339e+07
M116T50	L-Proline	116.071	49.6	115.063	0.0859734	C5H9NO2	[M+H]+	Carboxylic acids and derivatives	Amino acids, peptides, and analogues	C00148	Cancer: overview; Membrane transport; Digestive system; Biosynthesis of other secondary metabolites; Translation; Amino acid metabolism; Global and overview maps	147-85-3	HMDB0000162	BioDeepDB	2	pos	7.5087e+06	7.18025e+06	1.0964e+07	1.11635e+07	4.70246e+06	6.07149e+06	3.74486e+06	2.8585e+06	6.82856e+06	9.06184e+06	5.17368e+06	7.56382e+06	6.53641e+06	6.65201e+06	8.03114e+06	7.82462e+06	1.43231e+06	8.19692e+06	2.90537e+06	2.18404e+06	9.92161e+06	7.20818e+06	7.9201e+06	1.23811e+07
M119T464_2	Phenylacetic acid	119.086	463.9	136.052	4.03475	C8H8O2	[M+H-H2O]+	Benzene and substituted derivatives		C07086	Amino acid metabolism; Xenobiotics biodegradation and metabolism; Global and overview maps	103-82-2	HMDB0000209	BioDeepDB	2	pos	909990	1.66021e+06	6.66562e+06	1.45017e+06	603316	1.79518e+06	2.37089e+06	516719	646391	2.533e+06	4.11255e+06	3.82853e+06	1.86325e+06	1.01639e+06	1.93641e+06	1.45439e+06	4.41639e+06	5.43903e+06	5.81562e+06	6.06804e+06	2.59828e+06	3.41193e+06	3.22084e+06	3.30453e+06
M120T61	L-Allothreonine	120.024	61.5	119.058	1.12689	C4H9NO3	[M+H]+	Carboxylic acids and derivatives	Amino acids, peptides, and analogues	C05519	Amino acid metabolism; Global and overview maps	24830-94-2 / 28954-12-3 / 144-98-9	HMDB0004041	BioDeepDB	2	pos	6.89852e+06	5.66311e+06	6.15513e+06	7.15511e+06	4.46168e+06	4.01383e+06	4.42493e+06	4.313e+06	4.00233e+06	4.18802e+06	4.32074e+06	4.98048e+06	3.74696e+06	3.08342e+06	3.41482e+06	3.1588e+06	1.30944e+07	1.13928e+07	1.04573e+07	9.45783e+06	4.81604e+06	4.92523e+06	5.56935e+06	5.17715e+06
M124T520	Nicotinic acid	124.086	519.8	123.032	4.51828	C6H5NO2	[M+H]+	Pyridines and derivatives	Pyridinecarboxylic acids and derivatives	C00253	Metabolism of cofactors and vitamins; Biosynthesis of other secondary metabolites; Infectious disease: bacterial; Chemical structure transformation maps; Global and overview maps	59-67-6	HMDB0001488	BioDeepDB	2	pos	3.64181e+07	3.37416e+08	5.39607e+07	2.17756e+08	5.94132e+08	3.81489e+08	7.42285e+07	4.432e+07	3.86198e+07	4.25401e+07	1.52825e+08	1.74418e+08	3.88597e+08	2.15657e+08	6.03017e+07	5.7916e+07	1.04718e+08	1.14223e+08	5.74904e+07	1.64224e+08	1.42019e+08	2.02864e+08	8.22407e+07	8.86159e+07
M140T44	Phosphonoacetate	140.069	44.5	139.988	1.11291	C2H5O5P	[M]+	Organic phosphonic acids and derivatives	Organic phosphonic acids	C05682	Metabolism of other amino acids; Global and overview maps	4408-78-0	HMDB0004110	BioDeepDB	2	pos	1.15073e+06	2.16207e+06	3.22735e+06	1.53103e+06	2.4245e+06	938029	629505	2.46198e+06	4.77194e+06	6.89987e+06	3.28969e+06	804939	767185	874173	2.48691e+06	3.11324e+06	2.84986e+06	3.17432e+06	754728	2.0991e+06	3.24243e+06	3.31908e+06	377673	674553
M126T57	Thymine	125.986	57.4	126.043	8.86787	C5H6N2O2	[M]+	Diazines	Pyrimidines and pyrimidine derivatives	C00178	Global and overview maps; Nucleotide metabolism	65-71-4	HMDB0000262	BioDeepDB	2	pos	1.67447e+07	1.69868e+07	1.67089e+07	1.6273e+07	1.64435e+07	2.94883e+07	1.75205e+07	2.32298e+07	1.02397e+07	1.79942e+07	1.84748e+07	1.15775e+07	2.00736e+07	3.31501e+07	2.03671e+07	2.6744e+07	1.15095e+07	1.80947e+07	1.80667e+07	1.63042e+07	2.8748e+07	1.94316e+07	1.25748e+07	1.94024e+07
M131T47	Heptanoic acid	130.965	46.7	130.099	3.96041	C7H14O2	[M+H]+	Fatty Acyls	Fatty acids and conjugates	C17714		111-14-8	HMDB0000666	BioDeepDB	2	pos	1.09156e+07	3.11917e+06	1.24341e+06	1.22289e+06	4.55678e+06	3.24343e+06	2.47492e+06	4.52552e+06	5.89624e+06	2.09233e+06	3.76669e+06	1.20828e+06	2.92246e+06	3.70864e+06	3.031e+06	1.1473e+06	325316	1.14645e+06	1.15789e+06	2.66353e+06	3.20969e+06	1.21027e+06	7.07698e+06	730932
M132T573	(R)-Pantolactone	131.534	572.6	130.063	0.413355	C6H10O3	[M+H]+			C01012		599-04-2		BioDeepDB	2	pos	4.84239e+07	1.43743e+08	1.3772e+08	9.64278e+07	1.30703e+08	1.37032e+08	7.66453e+07	6.56853e+07	8.32263e+07	8.74852e+07	7.49863e+07	1.23682e+08	7.33565e+07	6.90541e+07	8.06659e+07	8.74139e+07	3.30159e+07	5.13359e+07	6.49207e+07	8.21001e+07	6.41011e+07	1.08029e+08	1.09065e+08	7.26679e+07
M132T33	Glutaric acid	131.974	32.9	132.042	1.65086	C5H8O4	[M]+	Carboxylic acids and derivatives	Dicarboxylic acids and derivatives	C00489	Lipid metabolism; Amino acid metabolism; Global and overview maps	110-94-1	HMDB0000661	BioDeepDB	2	pos	6.90131e+06	7.48221e+06	8.5806e+06	1.71391e+07	1.21208e+07	2.54842e+06	3.82223e+06	7.38976e+06	7.83938e+06	9.13605e+06	9.74976e+06	9.10697e+06	1.24771e+07	1.00147e+07	1.02968e+07	1.76362e+07	9.35328e+06	1.05877e+07	7.10828e+06	1.65891e+07	1.25672e+07	7.32117e+06	5.29035e+06	2.41836e+07
M132T57	cis-4-Hydroxy-D-proline	131.975	56.7	131.058	1.13677	C5H9NO3	[M+H]+	Carboxylic acids and derivatives	Amino acids, peptides, and analogues	C03440	Amino acid metabolism; Global and overview maps	2584-71-6	HMDB0060460	BioDeepDB	2	pos	9.94483e+06	1.24653e+07	9.33718e+06	1.38768e+07	9.52823e+06	8.93384e+06	9.77884e+06	8.52494e+06	1.18259e+07	1.12987e+07	1.00496e+07	1.25367e+07	1.24702e+07	1.07287e+07	2.1943e+07	1.0073e+07	1.32794e+07	9.17856e+06	9.89026e+06	1.05542e+07	1.22798e+07	1.04606e+07	1.99647e+07	9.60085e+06
M133T47	L-Asparagine	133.061	47	132.054	2.2546	C4H8N2O3	[M+H]+	Carboxylic acids and derivatives	Amino acids, peptides, and analogues	C00152	Cancer: overview; Metabolism of other amino acids; Digestive system; Translation; Amino acid metabolism; Chemical structure transformation maps; Global and overview maps	70-47-3	HMDB0000168	BioDeepDB	2	pos	3.71259e+06	3.69106e+06	3.66306e+06	3.74523e+06	2.14512e+07	3.6389e+06	3.74631e+06	1.25057e+07	1.1918e+07	1.36209e+07	1.51718e+07	1.64568e+07	1.43356e+07	1.65007e+07	2.67474e+06	1.64553e+07	1.38382e+07	3.61175e+06	1.41436e+07	1.67087e+07	1.85664e+07	3.60718e+06	3.30063e+06	1.26868e+07
M132T686	L-Isoleucine	132.102	685.9	131.095	0.0301319	C6H13NO2	[M+H]+	Carboxylic acids and derivatives	Amino acids, peptides, and analogues	C00407	Cancer: overview; Metabolism of other amino acids; Digestive system; Biosynthesis of other secondary metabolites; Infectious disease: bacterial; Translation; Amino acid metabolism; Chemical structure transformation maps; Global and overview maps	73-32-5	HMDB0000172	BioDeepDB	2	pos	2.04711e+08	5.1665e+07	1.02378e+08	1.46346e+08	1.47841e+08	1.83857e+08	5.76757e+07	2.15194e+08	7.24045e+07	1.71319e+08	8.84944e+07	1.92908e+08	1.26675e+08	1.73821e+08	1.23223e+08	8.67336e+07	1.5592e+08	1.41194e+08	3.81645e+07	6.86389e+07	1.30433e+08	1.35035e+08	4.84353e+07	1.18516e+08
M142T42	O-Phosphoethanolamine	141.957	42.3	141.019	9.71559	C2H8NO4P	[M+H]+	Organic phosphoric acids and derivatives	Phosphate esters	C00346	Lipid metabolism; Signal transduction; Global and overview maps; Drug resistance: antimicrobial	1071-23-4	HMDB0000224	BioDeepDB	2	pos	2.43349e+07	2.22507e+06	1.39178e+07	2.50479e+07	1.46074e+07	1.39158e+07	1.32972e+07	1.25459e+07	1.25459e+07	4.39704e+07	1.62936e+07	1.90752e+07	9.97991e+07	1.31073e+07	3.08896e+07	1.3216e+07	1.27433e+07	1.24062e+07	1.21505e+07	1.21243e+07	1.19463e+07	1.19479e+07	1.52353e+07	1.1933e+07
M163T389	Anabasine	163.039	388.8	162.116	0.0407302	C10H14N2	[M+H]+			C06180	Chemical structure transformation maps; Biosynthesis of other secondary metabolites; Global and overview maps	13078-04-1 / 494-52-0	HMDB0004350	BioDeepDB	2	pos	5.8538e+06	6.58084e+06	5.93073e+06	6.04811e+06	4.34124e+06	4.31172e+06	5.06548e+06	6.64091e+06	4.69754e+06	8.61669e+06	5.36611e+06	6.2511e+06	9.68246e+06	9.43401e+06	4.10643e+06	6.00778e+06	7.89636e+06	6.93248e+06	3.99997e+06	3.50875e+06	1.0351e+07	7.33668e+06	5.69001e+06	9.00901e+06
M147T679	4-Hydroxycinnamic acid	146.981	678.8	164.047	6.72885	C9H8O3	[M+H-H2O]+	Cinnamic acids and derivatives	Hydroxycinnamic acids and derivatives	C00811	Metabolism of cofactors and vitamins; Biosynthesis of other secondary metabolites; Amino acid metabolism; Chemical structure transformation maps; Global and overview maps	7400-08-0 / 7400-08-0 501-98-4 / 501-98-4	HMDB0002035	BioDeepDB	2	pos	1.73227e+07	1.96676e+07	2.18963e+07	2.06269e+07	2.33503e+07	6.93698e+07	1.67262e+07	2.25712e+07	4.06218e+07	1.35258e+07	4.99263e+07	7.01611e+06	4.87217e+07	4.59099e+07	4.64152e+07	3.43395e+08	5.05637e+07	1.63366e+07	1.60935e+07	1.68919e+07	3.61658e+07	5.24075e+07	2.23422e+07	4.64261e+07
M130T72	L-Glutamic acid	130.05	72.3	147.053	23.2854	C5H9NO4	[M+H-H2O]+	Carboxylic acids and derivatives	Amino acids, peptides, and analogues	C00025	Neurodegenerative disease; Biosynthesis of other secondary metabolites; Substance dependence; Cellular community - eukaryotes; Energy metabolism; Metabolism of other amino acids; Excretory system; Carbohydrate metabolism; Cancer: overview; Membrane transport; Cell growth and death; Signal transduction; Nervous system; Digestive system; Environmental adaptation; Amino acid metabolism; Chemical str…	56-86-0	HMDB0000148	BioDeepDB	2	pos	3.28957e+06	2.66138e+06	2.88974e+06	2.7185e+06	2.55363e+06	3.06312e+06	2.6305e+06	2.7072e+06	3.67644e+06	2.51745e+06	3.55791e+06	3.22998e+06	2.72504e+06	2.82856e+06	2.35235e+06	2.71802e+06	2.84988e+06	2.91184e+06	3.19111e+06	3.03667e+06	2.96992e+06	2.71121e+06	2.70567e+06	2.28195e+06
M149T33	L-2-Hydroxyglutaric acid	148.976	32.8	148.037	6.95093	C5H8O5	[M+H]+	Fatty Acyls	Fatty acids and conjugates	C03196	Amino acid metabolism; Global and overview maps	13095-48-2	HMDB0000694	BioDeepDB	2	pos	9.88905e+06	1.09604e+07	1.06406e+07	5.16644e+06	1.28496e+07	1.8317e+07	9.43987e+06	1.44228e+07	7.21011e+06	1.25874e+07	1.16333e+07	1.17621e+07	9.96777e+06	1.45871e+07	8.51159e+06	1.28274e+07	5.77929e+06	5.60897e+06	9.0545e+06	8.98069e+06	1.17781e+07	9.63162e+06	7.90117e+06	9.60031e+06
M149T448	3-Methyladenine	149.024	448	149.07	4.11647	C6H7N5	[M]+	Imidazopyrimidines	Purines and purine derivatives	C00913		5142-23-4	HMDB0011600	BioDeepDB	2	pos	2.99896e+06	3.09599e+06	2.86229e+06	2.641e+06	3.22874e+06	3.05562e+06	5.88452e+06	3.60221e+06	3.15637e+06	3.07894e+06	3.46704e+06	3.09839e+06	2.96149e+06	3.11697e+06	2.5462e+06	3.23164e+06	2.97057e+06	2.91112e+06	5.66655e+06	2.41758e+06	3.1034e+06	3.00178e+06	2.97772e+06	2.73075e+06
M149T484	trans-Cinnamate	149.06	484.4	148.052	1.5055	C9H8O2	[M+H]+			C00423	Metabolism of cofactors and vitamins; Biosynthesis of other secondary metabolites; Amino acid metabolism; Chemical structure transformation maps; Global and overview maps	140-10-3		BioDeepDB	2	pos	2.58296e+06	678507	1.72425e+06	1.29261e+06	1.6919e+06	1.89127e+06	1.05997e+06	1.23192e+06	2.47604e+06	4.05774e+06	3.95182e+06	3.73528e+06	2.19452e+06	2.4357e+06	1.98777e+06	3.39549e+06	2.28488e+06	3.12202e+06	3.50259e+06	2.80145e+06	3.84752e+06	3.34303e+06	542153	491899
M151T40	D-Ribose	151.036	40.2	150.053	3.63242	C5H10O5	[M+H]+	Organooxygen compounds	Carbohydrates and carbohydrate conjugates	C00121	Carbohydrate metabolism; Membrane transport; Global and overview maps; Cell motility	613-83-2 / 50-69-1	HMDB0000283	BioDeepDB	2	pos	2.79806e+07	2.53167e+07	2.74783e+07	2.6442e+07	2.67946e+07	2.69798e+07	2.51464e+07	2.84821e+07	2.80128e+07	2.75172e+07	2.75889e+07	2.74099e+07	2.81514e+07	2.64969e+07	2.74566e+07	2.60641e+07	2.74216e+07	2.72684e+07	2.56301e+07	2.7909e+07	2.57989e+07	2.65629e+07	2.65758e+07	2.58918e+07
M153T559	Perillyl alcohol	153.091	559.5	152.12	2.85663	C10H16O	[M+H]+	Prenol lipids	Monoterpenoids	C02452	Global and overview maps; Metabolism of terpenoids and polyketides	536-59-4 / 18457-55-1	HMDB0003634	BioDeepDB	2	pos	872218	884941	968282	965260	1.05136e+07	1.0756e+07	1.04497e+07	8.93743e+06	899072	921081	952868	955546	826424	862356	815781	810897	4.61865e+06	4.99342e+06	5.07815e+06	5.69471e+06	5.05269e+06	5.08597e+06	6.42258e+06	6.58727e+06
M155T287	2,3-Butanediol	155.107	286.8	154.012	3.1932	C4H10O2S2	[M+H]+	Organooxygen compounds	Alcohols and polyols	C00265		513-85-9 / 3483-12-3	HMDB0003156	BioDeepDB	2	pos	983597	133393	1.75679e+06	838257	4.55996e+06	2.93624e+06	3.67925e+06	269304	2.17437e+06	4.12452e+06	1.75874e+06	1.63341e+06	1.77039e+06	2.44283e+06	2.27073e+06	2.0474e+06	1.39444e+06	3.29337e+06	3.38666e+06	1.03275e+06	1.96469e+06	2.44304e+06	2.92084e+06	319476
M156T45	L-Histidine	156.043	44.6	155.07	18.4216	C6H9N3O2	[M+H]+	Carboxylic acids and derivatives	Amino acids, peptides, and analogues	C00135	Cancer: overview; Membrane transport; Metabolism of other amino acids; Digestive system; Biosynthesis of other secondary metabolites; Translation; Amino acid metabolism; Chemical structure transformation maps; Global and overview maps	71-00-1	HMDB0000177	BioDeepDB	2	pos	712317	639802	2.49223e+06	687270	3.10002e+06	1.75913e+06	4.29402e+06	722614	2.48877e+06	3.84077e+06	2.91072e+06	4.15437e+06	1.46795e+06	2.37688e+06	2.9005e+06	3.89612e+06	2.11181e+06	4.13676e+06	5.87053e+06	1.38162e+06	3.83761e+06	1.83508e+06	5.29898e+06	1.44704e+06
M157T83	Uracil 5-carboxylate	156.966	83.2	156.017	0.0216197	C5H4N2O4	[M+H]+			C03030		23945-44-0		BioDeepDB	2	pos	5.04839e+07	4.63693e+07	4.74993e+07	4.74951e+07	5.30633e+07	5.97752e+07	5.31317e+07	5.86983e+07	4.93124e+07	5.48458e+07	5.90075e+07	4.69925e+07	3.94832e+07	3.37826e+07	4.45034e+07	8.36678e+07	9.51794e+07	5.42087e+07	5.01384e+07	5.22454e+07	5.59969e+07	6.96461e+07	5.44315e+07	9.62317e+07
M159T428	4,5-Dihydroorotic acid	158.959	427.6	158.033	12.6583	C5H6N2O4	[M+H]+	Carboxylic acids and derivatives	Amino acids, peptides, and analogues	C00337	Global and overview maps; Nucleotide metabolism	155-54-4 / 5988-19-2	HMDB0000528	BioDeepDB	2	pos	4.30944e+07	2.94766e+07	3.99125e+07	1.17304e+07	3.67039e+07	3.90829e+07	3.12726e+07	1.87752e+07	2.95033e+07	3.1391e+07	3.33561e+07	3.65912e+07	2.78952e+07	3.36947e+07	2.83793e+07	3.36629e+07	2.75885e+07	2.87227e+07	3.11829e+07	2.64456e+07	3.59423e+07	3.88723e+07	4.378e+07	4.00739e+07
M158T425	Pelargonic acid	158.154	425.5	158.131	4.55352	C9H18O2	[M]+	Fatty Acyls	Fatty acids and conjugates	C01601		112-05-0	HMDB0000847	BioDeepDB	2	pos	8.41591e+07	8.12143e+07	7.9786e+07	7.9558e+07	7.74877e+07	8.54562e+07	7.61436e+07	7.7946e+07	7.78585e+07	7.64007e+07	7.30622e+07	8.16656e+07	8.0646e+07	7.25605e+07	7.85917e+07	7.01238e+07	7.4374e+07	7.40227e+07	7.7589e+07	7.30019e+07	3.73452e+07	7.04368e+07	7.49846e+07	7.20195e+07
M166T101	L-Phenylalanine	166.087	100.8	165.079	3.03721	C9H11NO2	[M+H]+			C00079	Cancer: overview; Membrane transport; Metabolism of other amino acids; Digestive system; Biosynthesis of other secondary metabolites; Translation; Amino acid metabolism; Chemical structure transformation maps; Global and overview maps	673-06-3		BioDeepDB	2	pos	8.18715e+06	8.20352e+06	6.55615e+06	5.41117e+06	8.95686e+06	5.31911e+06	6.71642e+06	4.05894e+06	6.22818e+06	4.94049e+06	2.82581e+06	7.52978e+06	4.56707e+06	7.20535e+06	5.70084e+06	7.3174e+06	7.18581e+06	8.13213e+06	2.01278e+06	4.42644e+06	7.07052e+06	6.958e+06	4.19267e+06	3.25955e+06
M167T62	Desaminotyrosine	167.016	61.6	166.063	20.1113	C9H10O3	[M+H]+	Phenylpropanoic acids		C01744		501-97-3	HMDB0002199	BioDeepDB	2	pos	9.48567e+06	8.70961e+06	9.2527e+06	8.95729e+06	9.17562e+06	7.71529e+06	1.23522e+07	7.14218e+06	1.03584e+07	6.77525e+06	8.56174e+06	7.18976e+06	1.10167e+07	7.06611e+06	1.02767e+07	7.10016e+06	1.05831e+07	1.21206e+07	1.01781e+07	9.14946e+06	7.22259e+06	1.06959e+07	6.82699e+06	6.43013e+06
M169T231	Uric acid	169.05	231.3	168.028	17.5818	C5H4N4O3	[M+H]+	Imidazopyrimidines	Purines and purine derivatives	C00366	Global and overview maps; Nucleotide metabolism; Digestive system	69-93-2	HMDB0000289	BioDeepDB	2	pos	6.44487e+06	4.60824e+06	6.21213e+06	7.88958e+06	1.33934e+06	1.39238e+06	1.56224e+06	1.17995e+06	1.5579e+06	762045	903330	1.93028e+06	669076	646920	554611	591872	4.66291e+06	4.21084e+06	3.91313e+06	3.85762e+06	2.66372e+06	2.13612e+06	2.38829e+06	2.29111e+06
M171T341	Dihydroxyacetone phosphate	171.149	340.8	169.998	1.89394	C3H7O6P	[M+H]+	Organooxygen compounds	Carbohydrates and carbohydrate conjugates	C00111	Metabolism of cofactors and vitamins; Carbohydrate metabolism; Lipid metabolism; Energy metabolism; Global and overview maps	57-04-5	HMDB0001473	BioDeepDB	2	pos	8.22456e+06	7.25079e+06	5.38656e+06	2.91911e+06	9.97336e+06	1.14672e+07	8.96814e+06	5.20775e+06	9.58293e+06	8.80573e+06	5.28394e+06	5.20949e+06	4.2633e+06	4.72885e+06	7.205e+06	8.15011e+06	3.88013e+06	1.08567e+07	1.27576e+07	6.7866e+06	6.25513e+06	5.55331e+06	8.97765e+06	7.81506e+06
M172T88	3-Dehydroshikimate	171.993	88.3	172.037	2.49507	C7H8O5	[M]+			C02637	Chemical structure transformation maps; Amino acid metabolism; Global and overview maps; Metabolism of terpenoids and polyketides	2922-42-1		BioDeepDB	2	pos	2.45827e+08	4.13157e+07	1.19977e+08	1.04239e+08	4.50318e+08	1.56027e+08	3.13313e+08	6.58349e+07	4.29252e+08	1.91249e+08	2.15022e+08	4.63463e+08	1.78161e+08	6.51793e+07	1.50112e+08	6.15177e+07	6.21936e+07	6.36905e+07	2.06964e+08	1.95164e+07	2.3932e+08	6.40404e+07	5.6607e+07	1.15792e+08
M177T147	N-Formyl-L-methionine	176.97	147.1	177.046	11.2636	C6H11NO3S	[M]+	Carboxylic acids and derivatives	Amino acids, peptides, and analogues	C03145	Amino acid metabolism	4289-98-9	HMDB0001015	BioDeepDB	2	pos	2.26416e+06	197237	3.08534e+06	798008	4.13811e+06	888336	895477	2.49549e+06	870071	218802	213142	3.57355e+06	1.13148e+06	903833	914271	1.75837e+06	819655	935610	2.29859e+06	1.27701e+07	1.22805e+06	968825	955351	1.63288e+06
M177T202	Methyl beta-D-galactoside	176.97	201.9	194.079	11.4453	C7H14O6	[M+H-H2O]+			C03619	Membrane transport	1824-94-8		BioDeepDB	2	pos	1.50382e+07	2.344e+07	7.45288e+06	1.18682e+07	3.55521e+06	2.03064e+07	7.6819e+06	4.29871e+06	1.148e+07	2.44353e+07	7.73657e+06	2.11641e+07	7.69494e+06	1.5559e+07	1.0171e+07	6.75332e+06	1.59884e+07	3.8615e+07	1.95571e+07	1.09195e+07	2.06618e+07	2.27718e+07	1.60599e+07	6.43624e+06
M182T59	Acetylcholine chloride	182.029	59.3	181.087	0.18482	C7H16NO2. Cl	[M+H]+			C08201		60-31-1		BioDeepDB	2	pos	5.73624e+07	4.32269e+07	5.36967e+07	4.42742e+07	3.95564e+07	5.46617e+07	4.68562e+07	4.00736e+07	4.37027e+07	4.05697e+07	4.06703e+07	3.72523e+07	4.19148e+07	3.8313e+07	4.87659e+07	3.64344e+07	4.59796e+07	4.8664e+07	4.17831e+07	4.46508e+07	4.47444e+07	4.5144e+07	3.74036e+07	4.72352e+07
M183T32	Sorbitol	182.987	32.5	182.079	1.79103	C6H14O6	[M+H]+	Organooxygen compounds	Carbohydrates and carbohydrate conjugates	C00794	Carbohydrate metabolism; Membrane transport; Global and overview maps	50-70-4	HMDB0000247	BioDeepDB	2	pos	2.48781e+07	5.66645e+06	6.06664e+06	5.67887e+06	5.69315e+06	5.48592e+06	6.24497e+06	5.34978e+06	2.42331e+07	5.16452e+06	2.79643e+07	5.54081e+06	2.25264e+07	5.52642e+06	5.19562e+06	5.0002e+06	5.81802e+06	5.48383e+06	2.05785e+07	1.94342e+07	1.94535e+07	4.99486e+06	4.64816e+06	2.03125e+07
M183T55	4-Pyridoxic acid	182.987	55.3	183.053	6.96142	C8H9NO4	[M]+	Pyridines and derivatives	Pyridinecarboxylic acids and derivatives	C00847	Metabolism of cofactors and vitamins; Global and overview maps	82-82-6	HMDB0000017	BioDeepDB	2	pos	3.51568e+07	3.28578e+07	3.89735e+07	3.48398e+07	1.82576e+07	1.15102e+07	1.94106e+07	4.53732e+07	2.54975e+07	3.00713e+07	2.96563e+07	2.81668e+07	1.29092e+07	1.54424e+07	1.17428e+07	1.82905e+07	1.03051e+08	1.03787e+08	1.17229e+08	1.13589e+08	6.25416e+07	6.23988e+07	5.64198e+07	5.39533e+07
M200T52	Dodecanoic acid	199.976	52.4	200.178	3.35954	C12H24O2	[M]+	Fatty Acyls	Fatty acids and conjugates	C02679	Lipid metabolism; Biosynthesis of other secondary metabolites; Global and overview maps	143-07-7	HMDB0000638	BioDeepDB	2	pos	1.26124e+06	2.59473e+06	3.01579e+06	3.11793e+06	7.21876e+06	2.73873e+06	2.52024e+06	9.68021e+06	2.20011e+07	3.75201e+06	2.81241e+06	2.99686e+06	5.81607e+06	2.73651e+06	6.80027e+06	5.27903e+06	621377	6.36534e+06	2.13152e+06	1.25232e+07	1.97517e+06	1.05023e+07	2.74727e+06	2.87467e+06
M187T372	Undecanoic acid	186.954	372.2	186.162	12.9298	C11H22O2	[M+H]+	Fatty Acyls	Fatty acids and conjugates	C17715		112-37-8	HMDB0000947	BioDeepDB	2	pos	2.75776e+07	3.96236e+06	4.08367e+06	3.99842e+06	3.8529e+06	3.83874e+06	1.045e+07	9.94273e+06	1.21759e+07	3.58732e+06	3.60652e+06	3.62176e+06	1.22002e+07	3.67221e+06	8.793e+06	3.36075e+06	9.83455e+06	2.5177e+07	1.13726e+07	2.06127e+07	3.48299e+06	3.50593e+06	8.47757e+06	8.92366e+06
M198T637	Vanillylmandelic acid	198.186	637.5	198.053	4.20035	C9H10O5	[M]+	Phenols	Methoxyphenols	C05584	Amino acid metabolism; Global and overview maps	55-10-7	HMDB0000291	BioDeepDB	2	pos	1.10322e+07	9.83585e+06	1.56225e+07	1.70438e+07	2.16799e+07	6.91494e+06	3.35078e+07	1.34272e+07	1.03984e+07	6.91268e+06	9.07573e+06	1.57857e+07	3.30481e+07	1.94027e+07	4.67413e+07	2.4607e+07	1.11478e+07	1.50527e+07	1.54305e+07	1.15741e+07	1.6485e+07	2.61394e+07	9.15658e+06	1.05241e+07
M216T358	12-Hydroxydodecanoic acid	216.196	357.7	216.173	1.89128	C12H24O3	[M]+	Hydroxy acids and derivatives	Medium-chain hydroxy acids and derivatives	C08317		505-95-3	HMDB0002059	BioDeepDB	2	pos	1.51724e+06	1.43692e+06	1.60153e+06	1.62459e+06	1.74317e+06	1.50677e+06	1.65519e+06	1.54858e+06	1.91531e+06	1.88724e+06	1.84281e+06	1.81468e+06	1.62492e+06	1.73905e+06	1.68789e+06	1.63756e+06	1.85752e+06	1.79561e+06	1.71083e+06	1.69626e+06	1.67989e+06	1.31588e+06	1.54213e+06	1.59123e+06
M218T314	N-Acetylserotonin	218.212	314.3	218.106	2.6133	C12H14N2O2	[M]+	Indoles and derivatives	Hydroxyindoles	C00978	Amino acid metabolism; Global and overview maps	1210-83-9	HMDB0001238	BioDeepDB	2	pos	1.37104e+07	9.32891e+06	1.23644e+07	1.40102e+07	1.09508e+07	1.05647e+07	1.48778e+07	1.11753e+07	7.47857e+06	1.58865e+07	1.52474e+07	8.26552e+06	1.70495e+07	7.18177e+06	8.17936e+06	1.4691e+07	9.18617e+06	6.54405e+06	7.96856e+06	1.09685e+07	1.30165e+07	1.06388e+07	1.06002e+07	1.8657e+07
M204T525	L-Tryptophan	204.139	524.8	204.09	1.85339	C11H12N2O2	[M]+	Indoles and derivatives	Indolyl carboxylic acids and derivatives	C00078	Cancer: overview; Nervous system; Digestive system; Development and regeneration; Biosynthesis of other secondary metabolites; Translation; Amino acid metabolism; Chemical structure transformation maps; Infectious disease: parasitic; Global and overview maps	153-94-6	HMDB0013609	BioDeepDB	2	pos	1.165e+07	1.0254e+07	1.19065e+07	1.11734e+07	9.96114e+06	9.43151e+06	1.12673e+07	9.38812e+06	1.3591e+07	1.39993e+07	1.36912e+07	1.08736e+07	7.86317e+06	7.68236e+06	8.62132e+06	6.47948e+06	1.5867e+07	1.95433e+07	1.42964e+07	1.54781e+07	8.70972e+06	8.93144e+06	1.02959e+07	9.62693e+06
M225T305	Methyl jasmonate	225.149	305	224.141	1.00065	C13H20O3	[M+H]+	Fatty Acyls	Lineolic acids and derivatives	C11512	Lipid metabolism; Global and overview maps	1211-29-6 / 39924-52-2	HMDB0036583	BioDeepDB	2	pos	4.19903e+06	831571	1.03208e+06	4.56319e+06	4.4122e+06	3.16466e+06	6.48654e+06	3.63896e+06	4.38736e+06	3.14573e+06	3.38524e+06	3.22453e+06	3.50186e+06	2.93055e+06	5.33301e+06	3.45136e+06	3.90118e+06	3.90119e+06	3.52488e+06	831630	3.40036e+06	3.11846e+06	2.99603e+06	108304
M209T497	L-Kynurenine	209.154	497.3	208.085	2.04771	C10H12N2O3	[M+H]+	Organooxygen compounds	Carbonyl compounds	C00328	Amino acid metabolism; Infectious disease: parasitic; Global and overview maps	2922-83-0 / 343-65-7	HMDB0000684	BioDeepDB	2	pos	4.00666e+06	3.57406e+06	3.56997e+06	3.79013e+06	4.02772e+06	3.03756e+06	3.45989e+06	3.31365e+06	4.2646e+06	4.94137e+06	4.88676e+06	4.10712e+06	3.31519e+06	3.79754e+06	3.63823e+06	2.9946e+06	4.89037e+06	5.65205e+06	5.81453e+06	4.04518e+06	4.19594e+06	2.98587e+06	4.08448e+06	4.14665e+06
M224T49	Hydroxykynurenine	224.127	49.1	224.08	4.15841	C10H12N2O4	[M]+	Organooxygen compounds	Carbonyl compounds	C02794		484-78-6 / 2147-61-7	HMDB0000732	BioDeepDB	2	pos	8.45027e+06	8.09028e+06	7.41913e+06	6.54439e+06	8.54952e+06	7.91692e+06	8.88125e+06	7.11017e+06	8.64104e+06	8.09171e+06	8.13662e+06	8.08429e+06	8.75569e+06	8.13433e+06	8.00689e+06	7.71941e+06	7.5951e+06	8.53065e+06	8.30791e+06	8.19913e+06	8.07576e+06	7.68792e+06	8.87063e+06	8.02105e+06
M243T54_2	1-Hexadecanol	243.184	53.7	242.261	7.57538	C16H34O	[M+H]+	Fatty Acyls	Fatty alcohols	C00823	Lipid metabolism	36653-82-4	HMDB0003424	BioDeepDB	2	pos	5.30101e+08	8.07682e+08	7.58194e+08	9.60569e+08	4.35101e+08	2.2535e+08	5.67895e+08	4.89354e+08	6.91326e+08	4.16292e+08	5.39294e+08	6.08452e+08	7.9719e+08	4.33606e+08	6.51183e+08	6.89636e+08	3.90443e+08	4.98527e+08	4.41297e+08	5.11045e+08	7.04959e+08	4.50808e+08	3.39451e+08	2.30711e+08
M226T374	Porphobilinogen	226.18	374.2	226.095	0.0841937	C10H14N2O4	[M]+	Organonitrogen compounds	Amines	C00931	Metabolism of cofactors and vitamins; Global and overview maps	487-90-1	HMDB0000245	BioDeepDB	2	pos	2.5835e+07	3.10659e+07	2.51562e+07	2.86887e+07	2.20873e+07	1.89323e+07	2.83967e+07	2.89521e+07	2.12061e+07	2.00899e+07	8.10924e+06	2.20329e+07	3.11692e+07	1.88382e+07	2.58919e+07	3.18847e+07	2.53065e+07	2.92937e+07	3.05804e+07	2.78936e+07	2.89351e+07	2.8897e+07	2.71891e+07	1.72652e+07
M228T499	Deoxyuridine	228.197	499.1	228.075	6.27252	C9H12N2O5	[M]+	Pyrimidine nucleosides	Pyrimidine 2'-deoxyribonucleosides	C00526	Membrane transport; Global and overview maps; Nucleotide metabolism	951-78-0	HMDB0000012	BioDeepDB	2	pos	1.41956e+07	3.06239e+06	1.09022e+07	2.59263e+06	1.41255e+07	3.82785e+06	8.62827e+06	3.82956e+06	8.00492e+06	596546	2.92265e+06	3.7194e+06	1.462e+07	1.25752e+07	1.19144e+07	1.2587e+07	2.7636e+06	6.56996e+06	3.09601e+06	831157	6.86546e+06	3.08291e+06	1.32225e+07	2.68257e+06
M256T610	Palmitic acid	256.264	610.2	256.24	2.94065	C16H32O2	[M]+	Fatty Acyls	Fatty acids and conjugates	C00249	Lipid metabolism; Chemical structure transformation maps; Global and overview maps	57-10-3	HMDB0000220	BioDeepDB	2	pos	4.77982e+08	4.41251e+08	5.19812e+08	4.50567e+08	5.21612e+08	4.76276e+08	4.66019e+08	4.30806e+08	5.01045e+08	4.72868e+08	4.26984e+08	5.26812e+08	4.51383e+08	4.43705e+08	4.62795e+08	4.2845e+08	5.02861e+08	4.95934e+08	4.92358e+08	4.59975e+08	4.39654e+08	4.81322e+08	3.30158e+08	4.21838e+08
M252T53	5'-Deoxyadenosine	252.108	53.4	251.102	2.28473	C10H13N5O3	[M+H]+	5'-deoxyribonucleosides		C05198		4754-39-6	HMDB0001983	BioDeepDB	2	pos	3.29104e+06	745484	2.16673e+06	599723	3.40289e+06	1.3399e+07	1.92069e+06	768332	1.74836e+06	4.6751e+06	4.97704e+06	5.20414e+06	2.20061e+06	4.11842e+06	2.23574e+06	4.11528e+06	1.61769e+06	549823	2.06578e+06	2.31397e+06	3.26073e+06	2.05676e+06	552988	1.7707e+06
M252T72	2'-Deoxyadenosine	252.109	72.3	251.102	0.895421	C10H13N5O3	[M+H]+			C00559	Membrane transport; Global and overview maps; Nucleotide metabolism	16373-93-6	HMDB0000101	BioDeepDB	2	pos	6.08458e+06	1.05877e+07	2.32818e+07	1.64569e+07	2.09239e+07	1.03251e+07	1.19345e+07	1.15864e+07	6.74604e+06	1.07028e+07	1.05915e+07	1.52544e+07	7.89298e+06	1.07712e+07	2.85244e+07	1.41798e+07	7.98572e+06	1.74552e+07	1.01335e+07	2.27787e+07	7.94727e+07	3.15449e+07	5.14145e+06	7.80496e+06
M272T249	17a-Estradiol	272.185	249	272.178	2.25469	C18H24O2	[M]+	Steroids and steroid derivatives	Estrane steroids	C02537	Lipid metabolism	57-91-0	HMDB0000429	BioDeepDB	2	pos	9.66208e+06	9.26686e+06	9.56122e+06	1.03206e+07	3.21143e+06	3.24194e+06	3.65708e+06	2.92765e+06	3.73031e+06	4.56677e+06	4.76206e+06	3.23173e+06	966504	1.01447e+06	658562	3.01698e+06	6.82713e+06	6.73898e+06	6.17149e+06	6.25713e+06	4.25645e+06	4.06738e+06	4.20429e+06	4.2585e+06
M280T545	Linoleic acid	280.263	544.9	280.24	2.04165	C18H32O2	[M]+	Fatty Acyls	Lineolic acids and derivatives	C01595	Lipid metabolism; Chemical structure transformation maps; Global and overview maps	60-33-3	HMDB0000673	BioDeepDB	2	pos	1.29758e+06	1.09071e+06	1.13391e+06	588538	1.27012e+06	2.16822e+06	1.22143e+06	1.21458e+06	3.26405e+06	3.08415e+06	3.18349e+06	727392	631990	3.67916e+06	633031	3.55807e+06	2.42558e+06	2.70422e+06	2.08112e+06	1.6616e+06	908808	1.08079e+06	860698	575366
M282T572	(6Z)-Octadecenoic acid	282.279	572.4	282.256	3.63859	C18H34O2	[M]+			C08363		593-39-5		BioDeepDB	2	pos	8.04485e+07	1.4634e+08	1.48112e+08	1.31321e+08	1.07754e+08	1.08479e+08	8.28289e+07	1.1675e+08	1.49224e+08	7.45331e+07	2.54751e+07	1.4436e+08	1.64909e+08	7.82922e+07	1.02239e+08	1.47394e+08	1.08042e+08	1.34626e+08	1.04529e+08	1.14732e+08	5.18945e+07	1.68525e+08	1.67577e+07	3.81654e+07
M267T516	Stearic acid	267.172	516.3	284.272	1.04396	C18H36O2	[M+H-H2O]+	Fatty Acyls	Fatty acids and conjugates	C01530	Lipid metabolism; Chemical structure transformation maps; Sensory system	57-11-4 / 646-29-7	HMDB0000827	BioDeepDB	2	pos	7.17293e+06	2.73941e+07	2.12996e+07	3.71231e+07	4.76607e+06	2.12628e+07	2.24756e+07	1.97397e+07	4.35596e+06	4.25358e+06	3.96135e+06	4.21673e+06	4.08814e+06	4.22703e+06	3.35688e+07	9.92311e+06	4.91803e+07	4.89203e+07	4.2984e+07	4.7704e+07	2.55118e+07	1.79274e+07	2.35422e+07	1.33041e+07
M282T519	1-Methyladenosine	282.113	519.3	281.112	23.1319	C11H15N5O4	[M+H]+	Purine nucleosides		C02494		15763-06-1	HMDB0003331	BioDeepDB	2	pos	4.05375e+07	5.03551e+07	6.4888e+07	3.80231e+07	2.34088e+07	7.528e+07	6.66297e+07	5.92694e+07	1.2172e+07	3.64546e+07	1.73133e+07	1.6638e+07	5.39393e+07	5.21229e+07	3.05603e+07	4.12849e+07	5.53963e+07	5.84182e+07	6.42273e+07	5.79739e+07	4.90992e+07	5.76421e+07	6.10744e+07	2.7354e+07
M284T673	Glycitein	284.296	673.2	284.068	2.48926	C16H12O5	[M]+	Isoflavonoids	Isoflav-2-enes	C14536	Biosynthesis of other secondary metabolites; Global and overview maps	40957-83-3 / NA	HMDB0005781	BioDeepDB	2	pos	3.8638e+08	2.79156e+08	3.12989e+08	2.91395e+08	3.35439e+08	3.38951e+08	8.13041e+07	3.12156e+08	3.33275e+08	3.25514e+08	3.26015e+08	3.98635e+08	4.16023e+08	8.93156e+07	3.09044e+08	1.14628e+08	3.40682e+08	8.4341e+07	3.5684e+08	3.77094e+08	3.72478e+08	3.65659e+08	3.49999e+08	3.46113e+08
M298T157	5'-Methylthioadenosine	298.096	156.5	297.09	2.93865	C11H15N5O3S	[M+H]+	5'-deoxyribonucleosides	5'-deoxy-5'-thionucleosides	C00170	Chemical structure transformation maps; Amino acid metabolism; Global and overview maps; Metabolism of terpenoids and polyketides	2457-80-9	HMDB0001173	BioDeepDB	2	pos	303264	169494	165522	541431	484673	701193	420729	436255	172733	322618	717723	334807	366755	493791	488324	138520	544113	151034	497956	486128	404737	402520	411389	227691
M302T440	Quercetin	302.305	439.6	302.043	2.3723	C15H10O7	[M]+			C00389	Signal transduction; Biosynthesis of other secondary metabolites; Global and overview maps	522-12-3	HMDB0005794	BioDeepDB	2	pos	7.88543e+06	1.10571e+06	1.56892e+07	876214	2.24466e+07	3.3131e+07	2.44039e+07	672192	2.86121e+07	4.56397e+06	2.24957e+07	2.47499e+07	2.66919e+07	4.88239e+06	3.23225e+06	2.23278e+07	4.43667e+07	513530	9.52411e+06	1.94497e+07	2.0363e+06	611651	1.1478e+07	1.7547e+07
M321T607	Pregnanediol	321.315	607.3	320.272	1.26345	C21H36O2	[M+H]+	Steroids and steroid derivatives	Pregnane steroids	C05484	Lipid metabolism; Global and overview maps	80-92-2	HMDB0004025	BioDeepDB	2	pos	2.26607e+08	1.53429e+08	2.02328e+08	1.05134e+08	8.36815e+07	8.28238e+07	1.11808e+07	1.92395e+07	2.25238e+07	7.19086e+07	2.64915e+07	7.63095e+07	5.29353e+07	4.54774e+07	1.15227e+07	5.62822e+07	8.47707e+07	1.31858e+08	1.14367e+08	8.59238e+07	7.93295e+07	4.7726e+07	8.37678e+06	8.9035e+06
M312T533	Aflatoxin B1	312.362	532.6	312.063	1.32647	C17H12O6	[M]+	Coumarins and derivatives	Furanocoumarins	C06800	Biosynthesis of other secondary metabolites; Global and overview maps; Xenobiotics biodegradation and metabolism; Cancer: specific types	1162-65-8	HMDB0006552	BioDeepDB	2	pos	1.77735e+08	1.97008e+08	1.95816e+08	1.83445e+08	1.88351e+08	1.83962e+08	1.31148e+08	1.24702e+08	1.32549e+08	1.62978e+08	2.6246e+08	1.34219e+08	1.942e+08	2.11307e+08	1.04842e+08	1.59662e+08	2.1558e+08	1.80799e+08	1.93257e+08	1.54793e+08	1.71632e+08	1.98262e+08	2.48861e+08	1.31507e+08
M312T598	Arachidic acid	312.328	598.4	312.303	8.31095	C20H40O2	[M]+	Fatty Acyls	Fatty acids and conjugates	C06425	Lipid metabolism	506-30-9	HMDB0002212	BioDeepDB	2	pos	6.95358e+07	2.77176e+07	3.02826e+07	3.7742e+07	1.14642e+07	9.44186e+06	2.88267e+07	1.45105e+07	3.7349e+07	7.07635e+07	5.51501e+07	3.49983e+07	2.51815e+07	6.59956e+07	7.67017e+07	1.29757e+07	1.92693e+08	2.01086e+08	1.20139e+08	1.23258e+08	1.72997e+08	1.52126e+08	6.99309e+07	5.89758e+07
M336T653	12-Keto-tetrahydro-leukotriene B4	336.327	652.8	336.23	7.38722	C20H32O4	[M]+	Fatty Acyls	Eicosanoids	C02165	Nervous system; Sensory system; Digestive system; Endocrine system; Lipid metabolism; Signaling molecules and interaction; Structure-based classification; Global and overview maps	71160-24-2	HMDB0002995	BioDeepDB	2	pos	1.70816e+08	7.18578e+06	3.28682e+06	4.40038e+06	7.6683e+06	7.11449e+06	4.24234e+07	1.89508e+08	9.15456e+06	6.37443e+06	9.41686e+06	4.85237e+06	9.91341e+06	2.61815e+06	1.10472e+07	3.41736e+06	7.5646e+06	3.3318e+06	7.0276e+07	5.74651e+06	1.66373e+08	3.69037e+06	6.08515e+07	3.44674e+07
M338T607_1	Erucic acid	338.342	607	338.318	1.9811	C22H42O2	[M]+	Fatty Acyls	Fatty acids and conjugates	C08316	Lipid metabolism	112-86-7	HMDB0002068	BioDeepDB	2	pos	1.45961e+10	1.33059e+10	1.37322e+10	1.68532e+10	4.71371e+08	7.63071e+08	5.24388e+09	1.84082e+08	4.41818e+09	8.15594e+09	5.41509e+09	4.29004e+09	3.26466e+08	2.86095e+08	2.68791e+09	1.48531e+08	2.42468e+10	2.17129e+10	1.5047e+10	2.08898e+10	9.05831e+09	1.36917e+10	8.52592e+09	7.62149e+09
M343T405	Sucrose	343.294	405.2	342.116	1.34611	C12H22O11	[M+H]+	Organooxygen compounds	Carbohydrates and carbohydrate conjugates	C00089	Membrane transport; Sensory system; Digestive system; Carbohydrate metabolism; Global and overview maps	57-50-1	HMDB0000258	BioDeepDB	2	pos	3.05772e+06	2.4909e+06	3.29926e+06	2.8084e+06	4.80227e+06	5.22047e+06	3.70153e+06	4.1558e+06	3.1334e+06	2.35155e+06	1.02243e+06	2.44626e+06	1.32168e+06	1.80628e+06	1.06595e+06	767159	5.5567e+06	7.73856e+06	5.19675e+06	4.81899e+06	6.7083e+06	5.3985e+06	5.48186e+06	6.71174e+06
M334T404	Nicotinamide ribotide	334.294	404	334.057	2.66802	C11H15N2O8P	[M]+	Pyridine nucleotides	Nicotinamide nucleotides	C00455	Metabolism of cofactors and vitamins; Global and overview maps	1094-61-7	HMDB0000229	BioDeepDB	2	pos	15626	75266	1.76604e+06	11133.4	13905.9	277524	2.69844e+06	62357.2	178385	267702	183981	154397	70919.9	101389	126155	60215.4	1.03554e+07	1.72234e+07	4.31681e+06	3.09474e+06	1.75594e+06	2.18062e+06	2.29454e+06	6.09056e+06
M361T547	Aldosterone	361.222	547.4	360.194	0.333746	C21H28O5	[M+H]+	Steroids and steroid derivatives	Hydroxysteroids	C01780	Excretory system; Endocrine system; Lipid metabolism; Target-based classification: Nuclear receptors; Global and overview maps	52-39-1	HMDB0000037	BioDeepDB	2	pos	3.66864e+06	8.22325e+06	4.4772e+06	1.81367e+07	2.74838e+06	3.69841e+06	1.26818e+07	1.22407e+07	1.22791e+07	1.01772e+07	7.41584e+06	3.56349e+06	2.99148e+06	2.58574e+06	3.38146e+06	4.49805e+06	5.22688e+06	3.8883e+06	3.28582e+06	8.58329e+06	2.97337e+06	9.6867e+06	2.14445e+06	2.19641e+06
M343T48	Trehalose	343.123	48.4	342.116	0.666754	C12H22O11	[M+H]+	Organooxygen compounds	Carbohydrates and carbohydrate conjugates	C01083	Carbohydrate metabolism; Membrane transport; Global and overview maps	99-20-7	HMDB0000975	BioDeepDB	2	pos	1.71443e+06	2.12227e+06	1.68757e+06	1.6562e+06	354753	1.79236e+06	2.27833e+06	2.31005e+06	3.07297e+06	3.18779e+06	2.71268e+06	2.04403e+06	24973.4	25277.5	1.03213e+06	965338	7.86056e+06	8.97684e+06	7.75851e+06	9.38557e+06	9.85153e+06	9.61308e+06	9.40331e+06	1.09327e+07
M347T502	Corticosterone	347.22	501.5	346.214	3.6749	C21H30O4	[M+H]+	Steroids and steroid derivatives	Hydroxysteroids	C02140	Lipid metabolism; Neurodegenerative disease; Global and overview maps; Endocrine system	50-22-6	HMDB0001547	MoNA	2	pos	985790	618578	886561	981558	1.04187e+06	1.2264e+06	1.23251e+06	928193	997950	1.03194e+06	1.1876e+06	692177	885721	992591	891429	389092	1.27277e+06	528713	1.04319e+06	902761	689328	806420	645926	897008
M346T476	Cyclic GMP	346.333	476.5	345.047	2.13237	C10H12N5O7P	[M+H]+	Purine nucleotides	Cyclic purine nucleotides	C00942	Circulatory system; Nervous system; Signal transduction; Sensory system; Endocrine system; Digestive system; Environmental adaptation; Nucleotide metabolism; Cellular community - eukaryotes; Immune system; Global and overview maps	7665-99-8	HMDB0001314	BioDeepDB	2	pos	1.78667e+06	708256	1.50441e+06	484057	1.39551e+06	2.57028e+06	153047	121458	1.44542e+06	1.06749e+06	1.45357e+06	1.74528e+06	1.92999e+06	1.24163e+06	777006	1.67007e+06	2.77771e+06	160470	1.4275e+06	1.56865e+06	1.03203e+06	949391	770352	1.25424e+06
M376T491_1	Lithocholic acid	376.313	490.9	376.298	0.0900373	C24H40O3	[M]+	Lipids and lipid-like molecules	Steroids and steroid derivatives	C03990	Lipid metabolism; Digestive system	434-13-9	HMDB0000761	BioDeepDB	2	pos	2.57928e+08	3.73364e+08	2.64956e+08	2.22681e+08	3.82242e+08	3.69514e+08	2.71892e+08	3.52529e+08	3.6016e+08	3.06643e+08	3.65422e+08	3.72266e+08	3.82973e+08	4.54406e+08	7.81346e+07	4.04358e+08	1.69847e+08	2.93228e+08	1.72573e+08	1.26023e+08	4.58005e+08	1.10505e+08	1.2964e+08	2.12063e+08
M362T406_1	Thyrotropin releasing hormone	362.327	405.8	362.17	0.540128	C16H22N6O4	[M]+	Carboxylic acids and derivatives	Amino acids, peptides, and analogues	C03958		24305-27-9	HMDB0060080	BioDeepDB	2	pos	7.59441e+06	1.11176e+07	1.38821e+07	7.87205e+06	1.45354e+07	1.45017e+07	7.74844e+06	1.416e+07	1.1843e+07	4.04364e+06	8.03995e+06	9.80801e+06	1.31388e+07	1.13019e+07	5.31531e+06	5.34117e+06	8.53469e+06	9.33497e+06	1.32124e+07	3.89632e+06	4.95571e+06	1.25477e+07	1.99951e+06	1.04512e+06
M364T651	GMP	364.344	651.2	363.058	2.42795	C10H14N5O8P	[M+H]+	Purine nucleotides	Purine ribonucleotides	C00144	Drug resistance: antineoplastic; Signal transduction; Sensory system; Nucleotide metabolism; Chemical structure transformation maps; Global and overview maps	85-32-5	HMDB0001397	BioDeepDB	2	pos	2.27965e+07	1.43153e+06	2.66135e+07	1.50365e+07	2.193e+07	1.81824e+07	1.07047e+07	1.87278e+07	1.4662e+07	1.37263e+07	5.5866e+06	1.21012e+07	1.59805e+06	3.5179e+06	1.17438e+07	1.94564e+07	1.88151e+07	1.82399e+07	1.55269e+07	1.83063e+07	1.80055e+07	2.80678e+07	6.48943e+06	7.62318e+06
M369T677	Cholesterol	369.352	676.9	386.355	0	C27H46O	[M+H-H2O]+	Steroids and steroid derivatives	Cholestane steroids	C00187	Endocrine and metabolic disease; Digestive system; Endocrine system; Lipid metabolism; Xenobiotics biodegradation and metabolism; Metabolism of terpenoids and polyketides; Cancer: specific types; Chemical structure transformation maps; Global and overview maps	57-88-5	HMDB0000067	BioDeepDB	2	pos	4.77798e+07	4.9282e+07	5.6554e+07	3.57533e+07	5.02467e+07	2.6134e+07	3.11619e+07	2.45603e+07	6.03261e+06	7.87321e+06	5.42667e+06	6.32959e+06	6.41601e+06	5.57544e+06	5.29158e+06	5.22653e+06	2.62344e+07	1.57204e+07	2.86909e+07	5.90499e+06	4.62604e+06	5.02538e+06	2.36962e+06	2.44664e+06
M391T577_2	S-Hexyl-glutathione	391.284	577.1	391.178	0.674659	C16H29N3O6S	[M]+			C02886		24425-56-7		BioDeepDB	2	pos	1.02021e+08	3.24963e+07	1.76462e+08	3.91866e+07	8.64062e+07	3.50049e+07	1.25593e+08	6.28601e+07	7.8121e+07	8.25359e+07	4.89849e+07	3.13443e+07	8.716e+07	3.97077e+07	4.90526e+07	1.07144e+08	2.75116e+07	2.57699e+07	2.68713e+07	5.18179e+07	2.55733e+07	2.76116e+07	3.04766e+07	2.86495e+07
M392T502_2	Chenodeoxycholic acid	392.301	501.8	392.293	21.667	C24H40O4	[M]+	Steroids and steroid derivatives	Bile acids, alcohols and derivatives	C02528	Lipid metabolism; Global and overview maps; Digestive system	474-25-9	HMDB0000518	BioDeepDB	2	pos	8.31528e+06	4.45154e+06	6.78605e+06	4.44927e+06	4.28442e+06	4.24368e+06	4.77098e+06	3.8891e+06	5.0318e+06	5.61887e+06	6.15107e+06	4.18827e+06	3.7546e+06	3.87213e+06	4.26383e+06	3.8402e+06	3.14129e+06	9.1143e+06	8.34892e+06	6.64607e+06	8.67293e+06	1.23307e+07	1.33197e+06	4.63549e+06
M384T442	7-Dehydrocholesterol	384.348	442.3	384.339	3.60747	C27H44O	[M]+	Steroids and steroid derivatives	Cholestane steroids	C01164	Lipid metabolism; Global and overview maps; Metabolism of terpenoids and polyketides	434-16-2	HMDB0000032	BioDeepDB	2	pos	8.9352e+06	1.57828e+06	1.99052e+06	8.93237e+06	3.5675e+06	6.07755e+06	3.98186e+06	597488	1.17137e+06	4.20817e+06	3.71098e+06	460954	779330	2.76305e+06	972923	4.66702e+06	1.00472e+06	776180	4.89204e+06	3.16313e+06	3.47252e+06	1.41946e+06	102113	140878
M385T576	S-Adenosylhomocysteine	385.331	576.4	384.122	7.1248	C14H20N6O5S	[M+H]+	5'-deoxyribonucleosides	5'-deoxy-5'-thionucleosides	C00021	Amino acid metabolism; Global and overview maps	979-92-0	HMDB0000939	BioDeepDB	2	pos	3.33422e+06	1.6689e+06	819534	1.72914e+06	3.86686e+06	3.69217e+06	1.57257e+06	1.0636e+06	3.31304e+06	1.53824e+06	4.21764e+06	2.33075e+06	2.33237e+06	3.10728e+06	1.55878e+06	2.72564e+06	2.96405e+06	817662	2.61854e+06	2.48987e+06	2.79143e+06	2.14661e+06	384258	2.37834e+06
M408T651	Allocholic acid	408.37	651.2	408.288	5.21927	C24H40O5	[M]+	Steroids and steroid derivatives	Bile acids, alcohols and derivatives	C00695	Lipid metabolism; Global and overview maps; Digestive system	2464-18-8 / 81-25-4	HMDB0000505	BioDeepDB	2	pos	9.07247e+06	5.33107e+06	1.10493e+07	8.19616e+06	106893	99532.6	6.79082e+06	6.44564e+06	9.5524e+06	1.28821e+07	1.22784e+07	1.25801e+07	4.86538e+06	4.96454e+06	7.54385e+06	7.22275e+06	3.00338e+07	4.68789e+07	2.71694e+07	3.87162e+07	9.15005e+06	2.23624e+06	180818	279793
M415T475_2	Sodium deoxycholate	415.211	475.4	414.275	1.97858	C24H39O4. Na	[M+H]+			C11171		302-95-4		BioDeepDB	2	pos	2.85122e+06	1.81881e+06	1.12981e+07	1.15332e+07	8.16718e+06	2.17271e+07	5.40122e+06	5.06809e+06	3.40798e+06	6.16922e+06	6.9577e+07	2.76874e+06	7.93462e+06	4.76741e+06	7.9233e+06	1.11684e+07	8.45403e+06	3.54172e+07	2.77816e+07	7.20831e+06	2.99043e+06	1.05966e+07	8.74179e+06	7.64941e+06
M426T492_1	Lanosterin	426.321	491.7	426.386	1.79647	C30H50O	[M]+	Prenol lipids	Triterpenoids	C01724	Lipid metabolism; Global and overview maps	79-63-0	HMDB0001251	BioDeepDB	2	pos	3.97681e+06	1.66368e+06	2.25968e+06	3.71236e+06	3.61618e+06	3.70573e+06	3.08364e+06	2.43306e+06	5.86475e+06	4.20229e+06	6.39866e+06	4.50612e+06	4.55751e+06	3.91928e+06	2.8633e+06	3.82228e+06	3.95656e+06	1.45665e+06	1.64583e+06	2.58735e+06	3.32621e+06	3.43149e+06	2.4925e+06	2.87755e+06
M413T651	alpha-Tocopherol	413.326	651.5	430.381	6.79836	C29H50O2	[M+H-H2O]+	Prenol lipids	Quinone and hydroquinone lipids	C02477	Metabolism of cofactors and vitamins; Cell growth and death; Digestive system; Chemical structure transformation maps; Global and overview maps	59-02-9	HMDB0001893	BioDeepDB	2	pos	7.42687e+06	5.53893e+06	5.84382e+06	7.52387e+06	7.60668e+06	9.06615e+06	1.2263e+07	9.06985e+06	7.6649e+06	6.18302e+06	8.19536e+06	7.70591e+06	7.64026e+06	7.68859e+06	6.76023e+06	9.48413e+06	7.86892e+06	5.11129e+06	8.89424e+06	8.43319e+06	7.17957e+06	7.59972e+06	3.73425e+06	6.84767e+06
M432T464_2	Isovitexin	432.237	464	432.106	5.34595	C21H20O10	[M]+			C01714	Biosynthesis of other secondary metabolites	38953-85-4 / 29702-25-8		BioDeepDB	2	pos	1.96115e+08	2.00475e+08	1.53314e+08	1.63781e+08	1.96031e+08	1.77716e+08	1.77292e+08	1.82678e+08	1.63913e+08	1.75318e+08	3.41484e+08	1.44149e+08	1.88537e+08	1.84252e+08	1.73307e+08	1.47034e+08	1.5812e+08	1.67039e+08	1.83314e+08	1.78989e+08	2.04848e+08	1.40218e+08	1.25724e+08	1.08783e+08
M610T585	Rutin	610.181	585.3	610.153	6.60681	C27H30O16	[M]+			C05625	Biosynthesis of other secondary metabolites; Global and overview maps	207671-50-9	HMDB0003249	BioDeepDB	2	pos	8.6921e+07	5.08583e+07	3.01665e+07	1.19093e+08	1.57155e+08	4.20855e+08	1.16448e+07	1.86045e+07	1.98949e+07	4.21652e+07	8.47608e+07	9.33848e+07	4.52369e+07	5.46034e+07	2.16189e+07	1.67853e+07	2.96277e+07	1.71339e+07	8.77604e+06	1.77694e+07	1.69841e+07	1.24142e+07	3.20105e+07	4.93274e+06
M667T48_3	Maltotetraose	667.237	48.2	666.222	10.4717	C24H42O21	[M+H]+	Organooxygen compounds	Carbohydrates and carbohydrate conjugates	C02052		34612-38-9	HMDB0001296	BioDeepDB	2	pos	1.77815e+07	1.45306e+07	2.12518e+07	1.83509e+07	3.11295e+06	5.10374e+06	3.13079e+06	2.09074e+07	2.95496e+06	2.91808e+07	4.29245e+06	3.7462e+06	2.76835e+06	3.21958e+06	2.05786e+06	1.04122e+07	2.17577e+06	7.19677e+06	1.32114e+07	4.71239e+06	2.06959e+07	3.88149e+06	7.05777e+06	4.84277e+06
M104T653	Choline	104.106	653.2	104.108	6.7239	C5H14NO	[M+H]+	Organonitrogen compounds	Quaternary ammonium salts	C00114	Cancer: overview; Membrane transport; Nervous system; Digestive system; Lipid metabolism; Amino acid metabolism; Global and overview maps	62-49-7	HMDB0000097	BioDeepDB	2	pos	1.27297e+08	1.56592e+08	1.70524e+08	1.48088e+08	1.83324e+08	1.76585e+08	2.34675e+08	5.45428e+07	2.28223e+08	4.84165e+07	2.23541e+08	1.46273e+08	5.43166e+07	1.68741e+08	5.2316e+07	2.33141e+08	2.21124e+08	1.72096e+08	1.40313e+08	2.32093e+08	1.44338e+08	2.55021e+08	1.73218e+08	2.42723e+08
M118T49	L-Valine	118.086	49.1	117.079	4.03097	C5H11NO2	[M+H]+	Carboxylic acids and derivatives	Amino acids, peptides, and analogues	C00183	Cancer: overview; Metabolism of cofactors and vitamins; Metabolism of other amino acids; Membrane transport; Digestive system; Biosynthesis of other secondary metabolites; Translation; Amino acid metabolism; Chemical structure transformation maps; Global and overview maps	72-18-4	HMDB0000883	BioDeepDB	2	pos	3.28533e+07	2.59e+07	2.07161e+07	2.32263e+07	5.20843e+07	1.66975e+07	6.66361e+07	2.66984e+07	2.36124e+07	1.19646e+07	2.19107e+07	3.85218e+07	9.29801e+07	5.18732e+07	1.37285e+08	5.10457e+07	4.16372e+07	4.43889e+07	3.87053e+07	3.87491e+07	4.02373e+07	6.74102e+07	1.88782e+07	1.80257e+07
M152T72	Guanine	152.057	72.4	151.049	1.3153	C5H5N5O	[M+H]+	Imidazopyrimidines	Purines and purine derivatives	C00242	Global and overview maps; Nucleotide metabolism	73-40-5	HMDB0000132	BioDeepDB	2	pos	4.13963e+06	3.56948e+06	2.95268e+06	4.21907e+06	1.85363e+06	1.85385e+06	1.93174e+06	1.82357e+06	2.02467e+06	2.15435e+06	2.31462e+06	1.66789e+06	479759	759709	1.11759e+06	2.51187e+06	2.4404e+06	3.21042e+06	2.44751e+06	2.51242e+06	2.26377e+06	2.13851e+06	1.91763e+06	2.16294e+06
M135T464	Chavicol	135.081	463.9	134.073	1.65827	C9H10O	[M+H]+	Phenols	1-hydroxy-2-unsubstituted benzenoids	C16930	Biosynthesis of other secondary metabolites	501-92-8	HMDB0034107	BioDeepDB	2	pos	2.73031e+06	2.42569e+06	2.22407e+06	2.38619e+06	2.23963e+06	2.16458e+06	2.36902e+06	2.50828e+06	2.18427e+06	2.40329e+06	2.17491e+06	2.5717e+06	2.37538e+06	2.33955e+06	2.08941e+06	3.80628e+06	2.45341e+06	2.33622e+06	2.33359e+06	2.5313e+06	2.37778e+06	2.43666e+06	2.33826e+06	2.29969e+06
M136T51	Adenine	136.062	51.1	135.054	1.46992	C5H5N5	[M+H]+	Imidazopyrimidines	Purines and purine derivatives	C00147	Metabolism of terpenoids and polyketides; Global and overview maps; Nucleotide metabolism	73-24-5	HMDB0000034	BioDeepDB	2	pos	1.30557e+07	1.01667e+07	1.32852e+07	1.37601e+07	3.66739e+06	3.33252e+06	3.56572e+06	2.43496e+06	5.252e+06	4.62683e+06	4.07732e+06	4.51119e+06	616040	1.01275e+06	501662	1.4952e+06	1.71949e+07	2.00898e+07	1.58924e+07	1.21638e+07	5.35304e+06	5.74822e+06	4.69248e+06	6.03342e+06
M163T72	Nicotine	163.123	72.3	162.116	0.613034	C10H14N2	[M+H]+	Pyridines and derivatives	Pyrrolidinylpyridines	C00745	Environmental adaptation; Biosynthesis of other secondary metabolites; Xenobiotics biodegradation and metabolism; Substance dependence; Chemical structure transformation maps; Global and overview maps	54-11-5	HMDB0001934	BioDeepDB	2	pos	4.93672e+06	4.3596e+06	5.56077e+06	4.65054e+06	5.44048e+06	5.05341e+06	5.35881e+06	5.0745e+06	6.09951e+06	6.51918e+06	6.29895e+06	5.53916e+06	4.1689e+06	4.10889e+06	4.09661e+06	3.41966e+06	8.31927e+06	1.05618e+07	8.17523e+06	8.32417e+06	4.93358e+06	4.8955e+06	5.40031e+06	5.86537e+06
M175T44	L-Arginine	175.119	44	174.112	2.28416	C6H14N4O2	[M+H]+	Carboxylic acids and derivatives	Amino acids, peptides, and analogues	C00062	Cancer: overview; Membrane transport; Neurodegenerative disease; Biosynthesis of other secondary metabolites; Translation; Amino acid metabolism; Chemical structure transformation maps; Infectious disease: parasitic; Global and overview maps	74-79-3	HMDB0000517	BioDeepDB	2	pos	915235	162107	810797	1.00161e+06	582439	177497	624809	270630	80518.8	236392	2.0874e+06	5.60683e+06	62115.8	60613.1	256731	270213	635170	382055	175773	673124	67162.4	268133	243023	500113
M180T474	Mexiletine	180.139	473.5	179.131	2.22051	C11H17NO	[M+H]+	Phenol ethers		C07220		31828-71-4	HMDB0014523	BioDeepDB	2	pos	1.41039e+06	1.00535e+06	861894	1.34557e+06	1.25133e+06	874454	1.06704e+06	1.73643e+06	1.17514e+06	1.09298e+06	1.9118e+06	1.37703e+06	1.41366e+06	1.32156e+06	2.11493e+06	763862	908067	1.65004e+06	2.07104e+06	1.02451e+06	1.47105e+06	1.23757e+06	974703	1.91485e+06
M193T299	3-(3,4-Dihydroxy-5-methoxy)-2-propenoic acid	193.05	299.5	210.053	22.9682	C10H10O5	[M+H-H2O]+	Cinnamic acids and derivatives	Hydroxycinnamic acids and derivatives	C05619	Chemical structure transformation maps; Biosynthesis of other secondary metabolites; Global and overview maps	1782-55-4/2041-35-2	HMDB0035484	BioDeepDB	2	pos	1.5174e+06	1.5109e+06	1.16107e+06	877736	882555	250561	1.55348e+06	1.61978e+06	1.08095e+06	820432	960270	770539	1.06394e+06	1.01248e+06	1.15674e+06	1.14917e+06	978748	745830	1.24326e+06	1.48048e+06	1.08147e+06	713724	686664	813651
M203T571	Caryophyllene alpha-oxide	203.18	571.3	220.183	21.823	C15H24O	[M+H-H2O]+	Prenol lipids	Sesquiterpenoids	C16908		1139-30-6	HMDB0036789	BioDeepDB	2	pos	1.01037e+07	2.84369e+06	8.8965e+06	2.02237e+06	1.72878e+06	1.77784e+06	1.28161e+06	973341	1.80858e+06	1.28792e+06	2.35354e+06	2.06224e+06	1.00256e+06	1.35911e+06	4.59168e+06	1.42639e+06	1.91333e+07	2.23222e+07	1.31222e+07	1.60145e+07	9.88597e+06	6.14292e+06	4.6311e+06	1.44104e+06
M203T432	(-)-alpha-Curcumene	203.18	431.7	202.172	0.610297	C15H22	[M+H]+	Prenol lipids	Sesquiterpenoids	C09649		4176-17-4	HMDB0061838	BioDeepDB	2	pos	1.77715e+06	815922	426531	297664	298961	230007	201408	243653	1.37186e+06	1.34557e+06	912585	1.2577e+06	7.70586e+06	5.04382e+06	962899	1.06642e+06	826574	340291	199906	196229	264945	179751	148019	163447
M204T50	N-Acetyl-D-glucosamine	204.087	50.3	221.09	21.2361	C8H15NO6	[M+H-H2O]+	Organooxygen compounds	Carbohydrates and carbohydrate conjugates	C00140	Carbohydrate metabolism; Membrane transport; Global and overview maps	7512-17-6	HMDB0000215	BioDeepDB	2	pos	6.78154e+06	6.50426e+06	5.83918e+06	4.54466e+06	4.89799e+06	4.10137e+06	4.04223e+06	3.92848e+06	8.28117e+06	9.09406e+06	7.93916e+06	7.68509e+06	1.51081e+06	2.52251e+06	2.97871e+06	2.04283e+06	9.26392e+06	1.02295e+07	8.93616e+06	1.15956e+07	3.27484e+06	4.65679e+06	4.02136e+06	3.77333e+06
M209T470	Myristoleic acid	209.19	470	226.193	22.1521	C14H26O2	[M+H-H2O]+	Fatty Acyls	Fatty acids and conjugates	C08322		544-64-9/NA	HMDB0002000	BioDeepDB	2	pos	1.16393e+07	2.45774e+07	1.85269e+07	1.80948e+07	2.38419e+07	1.50611e+07	7.3207e+06	1.36084e+07	1.61813e+07	1.63956e+07	1.62846e+07	1.01754e+07	2.17719e+07	2.00303e+07	1.52201e+07	1.96454e+07	1.25469e+07	1.8283e+07	1.43861e+07	1.19532e+07	1.49454e+07	1.34826e+07	5.44461e+06	6.2786e+06
M219T353	Capsidiol	219.175	353	236.178	0.456256	C15H24O2	[M+H-H2O]+	Prenol lipids	Sesquiterpenoids	C09627	Metabolism of terpenoids and polyketides	37208-05-2	HMDB0002352	BioDeepDB	2	pos	3.94938e+06	3.58591e+06	4.17999e+06	3.77476e+06	4.01882e+06	3.71779e+06	3.89672e+06	3.74049e+06	4.3392e+06	4.53642e+06	4.76353e+06	4.64185e+06	3.82968e+06	3.36329e+06	3.81378e+06	3.8052e+06	4.60533e+06	4.6401e+06	4.44568e+06	4.4544e+06	3.86319e+06	4.00739e+06	4.0065e+06	3.89094e+06
M255T337_1	Daidzein	255.066	337.5	254.058	2.74439	C15H10O4	[M+H]+	Isoflavonoids	Isoflav-2-enes	C10208	Chemical structure transformation maps; Biosynthesis of other secondary metabolites; Global and overview maps	486-66-8	HMDB0003312	BioDeepDB	2	pos	54436.1	34043.3	216287	144299	180529	45545.7	10082	19897.4	43821.8	151296	28436.9	127097	212018	173121	150816	195879	116289	36095.3	32772.5	29894.7	23702.4	42302	49946.8	83200.6
M277T527	Stearidonic acid	277.217	526.5	276.209	2.5251	C18H28O2	[M+H]+	Fatty Acyls	Lineolic acids and derivatives	C16300	Lipid metabolism; Global and overview maps	20290-75-9	HMDB0006547	BioDeepDB	2	pos	3.9108e+06	5.60802e+06	6.42212e+06	4.13612e+06	4.38936e+06	3.9626e+06	3.13376e+06	4.45454e+06	7.11396e+06	4.48833e+06	5.51838e+06	5.37939e+06	5.09768e+06	4.50591e+06	4.12449e+06	4.71923e+06	4.94692e+06	4.77506e+06	5.74234e+06	3.50811e+06	3.70851e+06	3.52802e+06	4.66465e+06	3.17907e+06
M266T83	Thiamine	266.125	83.3	265.112	20.0056	C12H17N4OS	[M+H]+	Diazines	Pyrimidines and pyrimidine derivatives	C00378	Metabolism of cofactors and vitamins; Membrane transport; Digestive system; Folding, sorting and degradation; Global and overview maps	59-43-8	HMDB0000235	mzCloud	2	pos	1.44718e+06	1.20441e+06	1.33467e+06	1.35127e+06	760203	885632	991335	1.05125e+06	2.00331e+06	1.97316e+06	1.89198e+06	1.61944e+06	281903	376911	311581	251704	5.89441e+06	5.812e+06	4.89481e+06	6.18997e+06	2.99283e+06	2.73578e+06	3.12733e+06	2.89872e+06
M284T407	Promethazine	284.128	406.9	284.135	24.9888	C17H20N2S	[M]+	Benzothiazines	Phenothiazines	C07404		60-87-7	HMDB0015202	BioDeepDB	2	pos	94956	9626.19	72243.5	68402.9	103302	125489	135934	43573.7	92994.2	104833	124810	65280.2	106906	90117.7	110174	83540.3	104345	45286.2	73370	90681.4	82918	67902.5	38127.9	70342.1
M268T72	Adenosine	268.104	72.3	267.097	1.49196	C10H13N5O4	[M+H]+	Purine nucleosides		C00212	Circulatory system; Membrane transport; Signal transduction; Endocrine system; Neurodegenerative disease; Signaling molecules and interaction; Nucleotide metabolism; Substance dependence; Global and overview maps	58-61-7	HMDB0000050	BioDeepDB	2	pos	785256	760136	775171	523362	637679	246144	3.12162e+06	288412	678045	3.37822e+06	4.22897e+06	690263	3.5233e+06	735258	639465	340374	5.45906e+06	4.12026e+06	4.95206e+06	1.84127e+06	4.9192e+06	4.73465e+06	494970	3.02899e+06
M279T416	Sulfamethazine	279.094	415.8	278.084	10.0325	C12H14N4O2S	[M+H]+	Benzene and substituted derivatives	Benzenesulfonamides	C19530		57-68-1	HMDB0015522	BioDeepDB	2	pos	450612	261299	398897	568969	555489	461716	371297	450092	461661	320056	575307	385542	404601	437902	455673	267173	436751	285701	328474	381938	287039	382975	284295	569228
M279T546	13S-hydroxyoctadecadienoic acid	279.234	545.8	296.235	5.01372	C18H32O3	[M+H-H2O]+	Fatty Acyls	Lineolic acids and derivatives	C14762	Lipid metabolism; Endocrine system	5204-88-6/29623-28-7	HMDB0004667	BioDeepDB	2	pos	1.62361e+07	2.03409e+06	2.00696e+06	1.46472e+07	1.9804e+06	2.0512e+06	6.99902e+06	7.42799e+06	1.0251e+07	8.54201e+06	6.80484e+06	7.38576e+06	9.27323e+06	5.89658e+06	1.19466e+07	6.83138e+06	4.15225e+06	1.84026e+07	1.1999e+07	1.3457e+07	5.76604e+06	1.9834e+06	2.44349e+06	1.8229e+07
M279T516	Alpha-dimorphecolic acid	279.234	515.7	296.235	5.01372	C18H32O3	[M+H-H2O]+	Fatty Acyls	Lineolic acids and derivatives	C14767	Lipid metabolism; Endocrine system	73543-67-6	HMDB0004670	BioDeepDB	2	pos	8.42985e+06	8.05656e+06	3.63762e+06	4.39e+06	6.04266e+06	6.39502e+06	6.27268e+06	6.10125e+06	6.50259e+06	5.63242e+06	7.60157e+06	5.79086e+06	5.665e+06	5.45084e+06	7.08512e+06	5.33701e+06	5.82444e+06	5.42699e+06	5.15361e+06	5.12556e+06	4.98058e+06	7.49403e+06	4.93716e+06	4.75302e+06
M282T621	Oleamide	282.279	620.7	281.272	1.1478	C18H35NO	[M+H]+	Fatty Acyls	Fatty amides	C19670		301-02-0	HMDB0002117	BioDeepDB	2	pos	6.74034e+08	5.89128e+08	1.14383e+09	1.57171e+09	2.07639e+09	3.73501e+08	7.74144e+07	1.4197e+09	6.59176e+08	2.95273e+09	1.51519e+09	8.09892e+08	1.59714e+09	1.16697e+09	5.65692e+08	1.72323e+09	1.67463e+09	3.8719e+08	6.85092e+08	2.63465e+08	3.10811e+08	1.25803e+08	3.40325e+07	1.12608e+08
M282T524	Sphingosine	282.279	524.1	299.282	16.0621	C18H37NO2	[M+H-H2O]+	Organonitrogen compounds	Amines	C00319	Lipid metabolism; Cell growth and death; Signal transduction; Global and overview maps	123-78-4	HMDB0000252	BioDeepDB	2	pos	1.80018e+07	4.57459e+06	2.41941e+07	1.52386e+07	2.80442e+07	2.29577e+07	1.77196e+07	1.67133e+07	1.9683e+07	2.6473e+07	2.45256e+07	2.64623e+07	2.17735e+07	1.99899e+07	3.11081e+07	1.10905e+07	1.89455e+07	3.30929e+07	3.27998e+07	1.44376e+07	2.38038e+07	2.05713e+07	1.76091e+07	2.75245e+06
M283T555	Oleic acid	283.263	554.8	282.256	0.97436	C18H34O2	[M+H]+	Fatty Acyls	Fatty acids and conjugates	C00712	Lipid metabolism; Chemical structure transformation maps; Aging	112-80-1	HMDB0000207	BioDeepDB	2	pos	6.04143e+06	6.09144e+06	7.10455e+06	1.2772e+07	7.29593e+06	7.11177e+06	6.86722e+06	1.27312e+07	7.77693e+06	4.51676e+06	9.25938e+06	8.88186e+06	5.39518e+06	4.66022e+06	8.80353e+06	6.93352e+06	7.70526e+06	1.42447e+07	1.63625e+07	9.57171e+06	8.19147e+06	2.78826e+06	7.58904e+06	6.14738e+06
M295T529	9(S)-HPODE	295.227	529.1	312.23	0	C18H32O4	[M+H-H2O]+	Fatty Acyls	Lineolic acids and derivatives	C14827	Lipid metabolism; Global and overview maps	29774-12-7	HMDB0006940	BioDeepDB	2	pos	5.50196e+06	6.62258e+06	8.09461e+06	6.6608e+06	9.04876e+06	1.03453e+07	7.90408e+06	8.68485e+06	1.03444e+07	8.97983e+06	1.3626e+07	1.03148e+07	1.28973e+07	1.21671e+07	1.3639e+07	1.01999e+07	7.49238e+06	1.03998e+07	9.35555e+06	8.99954e+06	5.57479e+06	7.40162e+06	4.27255e+06	2.81442e+07
M300T590	Palmitoylethanolamide	300.29	589.6	299.282	0.253089	C18H37NO2	[M+H]+	Carboximidic acids and derivatives	Carboximidic acids	C16512	Signaling molecules and interaction	544-31-0	HMDB0002100	BioDeepDB	2	pos	1.34466e+07	1.64262e+07	1.00192e+07	1.67889e+07	1.33118e+07	1.29227e+07	1.4437e+07	1.05519e+07	9.33222e+06	8.61054e+06	1.25567e+07	1.1971e+07	8.49297e+06	1.43745e+07	1.19984e+07	1.27103e+07	1.0203e+07	1.31371e+07	1.52884e+07	1.44025e+07	1.10752e+07	1.26584e+07	1.21021e+07	7.52639e+06
M301T545	12-KETE	301.217	545.1	318.219	16.3802	C20H30O3	[M+H-H2O]+	Fatty Acyls	Fatty acids and conjugates	C14807	Lipid metabolism	108437-64-5	HMDB0013633	BioDeepDB	2	pos	810975	3.89101e+06	4.07108e+06	4.75365e+06	3.30519e+06	703722	3.26869e+06	2.11323e+06	2.67244e+06	2.39417e+06	3.66539e+06	2.5158e+06	2.68867e+06	3.6166e+06	3.46206e+06	551124	3.67676e+06	4.00038e+06	3.83684e+06	2.83602e+06	3.12338e+06	3.76905e+06	2.62408e+06	1.55847e+06
M297T552	9,10-DHOME	297.242	551.9	314.246	0.0482386	C18H34O4	[M+H-H2O]+	Fatty Acyls	Fatty acids and conjugates	C14828	Lipid metabolism	263399-34-4	HMDB0004704	BioDeepDB	2	pos	1.21111e+07	1.23327e+07	2.67589e+07	2.51959e+07	2.12417e+07	1.57858e+07	3.05784e+07	2.07027e+07	2.41592e+07	1.86347e+07	2.69888e+07	2.37792e+07	2.74292e+07	1.92946e+07	5.98919e+07	2.27469e+07	2.50489e+07	4.05122e+07	4.11198e+07	4.95592e+07	5.31435e+07	5.51248e+07	1.06322e+07	1.05072e+07
M380T454	Sphingosine 1-phosphate	380.255	454.3	379.249	1.31491	C18H38NO5P	[M+H]+	Sphingolipids	Phosphosphingolipids	C06124	Signal transduction; Lipid metabolism; Signaling molecules and interaction; Infectious disease: bacterial; Immune system; Global and overview maps	26993-30-6	HMDB0000277	BioDeepDB	2	pos	3.16833e+06	3.2465e+06	3.11804e+06	2.48593e+06	3.2733e+06	3.00481e+06	3.33641e+06	3.97625e+06	3.86016e+06	3.72707e+06	3.92202e+06	3.38985e+06	2.93355e+06	2.59187e+06	2.96063e+06	1.96162e+06	3.7468e+06	3.71401e+06	3.42146e+06	3.29322e+06	2.7027e+06	4.51893e+06	3.40003e+06	3.69797e+06
M379T632	Ergocalciferol	379.336	631.7	396.339	10.6344	C28H44O	[M+H-H2O]+	Steroids and steroid derivatives	Vitamin D and derivatives	C05441	Lipid metabolism; Global and overview maps	50-14-6	HMDB0000900	BioDeepDB	2	pos	5.61605e+07	5.37169e+07	8.35276e+07	5.04296e+07	8.75654e+07	8.91464e+07	1.21306e+07	7.70992e+07	6.30088e+07	4.39769e+07	5.86622e+07	5.4725e+07	5.59707e+07	5.10559e+07	4.38179e+07	4.92556e+07	4.28258e+07	5.98846e+07	5.84857e+07	5.41329e+07	5.3258e+07	4.97676e+07	4.43651e+07	3.66769e+06
M384T656	Vitamin D3	384.348	655.8	384.339	22.3756	C27H44O	[M]+	Steroids and steroid derivatives	Vitamin D and derivatives	C05443	Lipid metabolism; Immune disease; Global and overview maps; Digestive system	67-97-0	HMDB0000876	BioDeepDB	2	pos	4.58453e+07	5.27646e+07	4.37106e+07	4.29252e+07	5.04298e+07	3.67262e+07	3.52556e+07	6.36451e+07	5.56358e+07	5.37488e+07	3.26761e+07	4.95818e+07	7.51504e+07	5.84491e+07	8.60322e+07	6.75277e+07	7.5535e+07	9.34618e+07	8.30583e+07	6.27635e+07	5.98918e+07	1.13874e+08	8.7206e+06	1.47509e+07
M410T622	Gamma-Tocotrienol	410.321	621.7	410.318	5.84908	C28H42O2	[M]+	Prenol lipids	Quinone and hydroquinone lipids	C14155	Metabolism of cofactors and vitamins; Global and overview maps	14101-61-2	HMDB0012958	BioDeepDB	2	pos	1.18897e+07	1.6112e+07	1.67926e+07	2.04555e+07	5.53369e+07	3.39414e+07	2.12744e+08	6.03789e+07	9.56033e+06	1.21179e+07	1.26302e+07	5.77012e+06	1.30425e+07	1.11552e+07	4.01027e+07	2.56384e+07	9.1445e+06	8.03249e+06	4.84808e+06	1.28644e+07	7.97014e+06	3.41914e+07	7.23417e+06	7.57657e+06
M413T629	alpha-Spinasterol	413.367	628.6	412.37	27.0365	C29H48O	[M+H]+	Steroids and steroid derivatives	Stigmastanes and derivatives	C08840		481-18-5	HMDB0033873	BioDeepDB	2	pos	3.05152e+07	2.82984e+07	2.29962e+07	3.4945e+07	4.07423e+07	2.94271e+07	3.62634e+07	3.42026e+07	3.19873e+07	5.0001e+07	3.13597e+07	2.77088e+07	5.20687e+07	2.29936e+07	2.61118e+07	1.94786e+07	2.72721e+07	3.18361e+07	4.79999e+07	4.02835e+07	1.42471e+07	8.69219e+06	2.55309e+07	2.09757e+07
M425T631	Betulin	425.377	631.3	442.381	2.58594	C30H50O2	[M+H-H2O]+	Prenol lipids	Triterpenoids	C08618		473-98-3	HMDB0036838	BioDeepDB	2	pos	1.07108e+07	1.77905e+07	8.82224e+06	1.35284e+07	1.71351e+07	1.45384e+07	8.98721e+06	1.03258e+07	2.46373e+07	1.82269e+07	8.78785e+06	1.62505e+07	8.6779e+06	4.6457e+06	7.21031e+06	1.28722e+07	1.76618e+07	1.85859e+07	7.59726e+06	1.9994e+07	9.14363e+06	1.70242e+07	8.18046e+06	9.44362e+06
M496T510	1-palmitoylglycerophosphocholine	496.339	510	496.34	2.4177	C24H51NO7P	[M+H]+	Glycerophospholipids	Glycerophosphocholines	C04102		17364-16-8	HMDB0062541	BioDeepDB	2	pos	3.61439e+06	3.43402e+06	5.07379e+06	5.11468e+06	5.45353e+06	3.73132e+06	4.81381e+06	3.38895e+06	3.45777e+06	2.82916e+06	1.79483e+06	3.27399e+06	2.36274e+06	2.87209e+06	5.70016e+06	3.64379e+06	3.57968e+06	5.72503e+06	4.36851e+06	5.08655e+06	3.467e+06	2.43335e+06	3.17896e+06	2.98798e+06
M568T592_1	Lutein	568.424	591.8	568.428	7.38885	C40H56O2	[M]+	Prenol lipids	Tetraterpenoids	C08601	Chemical structure transformation maps; Global and overview maps; Metabolism of terpenoids and polyketides	127-40-2	HMDB0003233	BioDeepDB	2	pos	5.87311e+07	4.12748e+07	3.70191e+07	3.55474e+07	3.8182e+07	4.73564e+07	2.51483e+07	2.20698e+07	1.88542e+07	3.39529e+07	1.90076e+07	3.15349e+07	1.77045e+07	2.33018e+07	4.08344e+07	5.77115e+07	5.91945e+07	4.32793e+07	5.322e+07	1.98124e+07	1.94226e+07	4.07858e+07	1.35692e+07	8.35744e+07
M253T420	10,11-Dihydroxycarbamazepine	253.087	420.1	270.1	23.9681	C15H14N2O3	[M+H-H2O]+	Benzazepines	Dibenzazepines	C07495	Xenobiotics biodegradation and metabolism	35079-97-1	HMDB0060568	MoNA	2	pos	725631	1.94352e+06	4.55878e+06	2.89504e+06	3.85993e+06	2.10374e+06	1.98729e+06	1.55476e+06	820379	1.96723e+06	2.0171e+06	2.16179e+06	1.3828e+06	1.82601e+06	5.78175e+06	2.25391e+06	1.58107e+06	3.42812e+06	1.83628e+06	4.44802e+06	1.56372e+07	6.27403e+06	1.21796e+06	1.46407e+06
M279T550	Dibutyl phthalate	279.16	550.4	278.152	2.20238	C16H22O4	[M+H]+	Benzene and substituted derivatives	Benzoic acids and derivatives	C14214		84-74-2	HMDB0033244	MoNA	2	pos	1.29966e+08	1.37926e+08	1.6542e+08	1.15932e+08	1.43684e+08	1.80183e+08	1.47401e+08	1.35594e+08	1.3955e+08	1.86298e+08	1.3776e+08	1.33975e+08	9.63722e+07	1.18144e+08	1.22391e+08	1.63472e+08	7.43548e+07	1.3259e+08	1.90209e+08	1.42158e+08	1.46725e+08	1.38251e+08	1.30173e+08	1.34106e+08
M126T40	Taurine	125.986	40.2	125.015	0.75217	C2H7NO3S	[M+H]+	Organic sulfonic acids and derivatives	Organosulfonic acids and derivatives	C00245	Membrane transport; Metabolism of other amino acids; Lipid metabolism; Signaling molecules and interaction; Energy metabolism; Global and overview maps	107-35-7	HMDB0000251	BioDeepDB	2	pos	8.95779e+07	3.55424e+08	3.30385e+08	9.06026e+07	3.61748e+08	7.77146e+07	3.96803e+07	2.105e+08	4.11274e+08	9.38564e+07	4.50476e+08	4.14734e+08	3.23573e+08	2.0931e+08	5.23133e+08	1.15745e+08	8.57055e+07	1.94323e+08	1.67897e+08	8.00057e+07	3.7037e+08	7.45145e+07	1.00677e+07	5.1821e+07
M439T498	Betulinic acid	439.355	498.1	456.36	5.08473	C30H48O3	[M+H-H2O]+	Prenol lipids	Triterpenoids	C08619		472-15-1	HMDB0030094	GNPS	2	pos	5.4656e+07	1.11942e+06	1.33268e+07	6.38334e+06	40431.3	2.41839e+06	423007	9.92574e+06	29262.5	25999.5	65250.8	118056	1.88798e+07	58404.9	49004.2	25840.7	6.8287e+08	1.4606e+08	2.76228e+08	9.43118e+07	1.78726e+07	2.04868e+07	2.24729e+07	6.75782e+06
M124T404	L-Histidinol	124.086	403.7	141.09	28.4802	C6H11N3O	[M+H-H2O]+	Organonitrogen compounds	Amines	C00860	Amino acid metabolism; Global and overview maps	4836-52-6	HMDB0003431	MoNA	2	pos	1.33911e+07	1.50057e+07	1.65094e+07	1.46131e+07	2.18947e+07	2.86491e+07	4.12546e+06	1.27493e+07	2.43627e+07	1.1709e+07	2.85667e+07	1.13819e+07	1.17208e+07	1.52708e+07	1.48395e+07	1.74369e+07	1.22575e+07	4.23813e+07	3.304e+07	1.46654e+07	1.91633e+07	2.34325e+07	1.19117e+07	1.98398e+07
M177T448	trans-Ferulic acid	177.055	448	194.058	26.1726	C10H10O4	[M+H-H2O]+	Cinnamic acids and derivatives	Hydroxycinnamic acids and derivatives	C01494	Chemical structure transformation maps; Biosynthesis of other secondary metabolites; Global and overview maps	537-98-4/1135-24-6	HMDB0000954	MoNA	2	pos	4.40062e+06	1.50317e+06	6.8941e+06	4.40846e+06	3.3885e+06	1.04299e+07	5.17126e+06	3.16006e+06	4.55293e+06	4.32631e+06	4.19645e+06	3.8476e+06	1.82809e+06	5.14179e+06	6.78674e+06	4.43527e+06	5.2248e+06	5.40568e+06	2.7294e+06	1.91008e+06	5.90446e+06	4.08307e+06	2.9844e+06	4.27228e+06
M315T615	Tetrahydrocannabinol	315.232	614.8	314.225	0.812736	C21H30O2	[M+H]+	Benzopyrans	1-benzopyrans	C06972	Biosynthesis of other secondary metabolites; Global and overview maps	1972-08-3	HMDB0014613	MoNA	2	pos	2.52272e+06	830870	3.9802e+06	4.76584e+06	2.504e+06	5.33157e+06	7.98322e+06	4.76156e+06	5.63345e+06	9.21493e+06	2.87327e+07	1.35121e+07	3.04844e+06	1.47693e+06	1.45874e+06	285106	1.50139e+07	9.01587e+06	4.01305e+06	5.20663e+06	4.21884e+06	2.83613e+06	3.03763e+06	5.70193e+06
M139T391	Isophorone	139.112	391.4	138.105	1.61021	C9H14O	[M+H]+	Carbonyl compounds	Ketones	C14743		78-59-1	HMDB0031195	mzCloud	2	pos	5.7924e+06	1.25155e+06	5.36962e+06	5.56937e+06	1.48224e+06	1.30107e+06	2.08756e+06	1.39548e+06	1.55098e+06	2.27324e+06	1.40198e+06	6.19014e+06	6.28041e+06	1.81609e+06	2.61033e+06	5.97994e+06	3.61315e+06	1.6917e+06	1.51763e+06	5.04765e+06	1.6374e+06	2.60598e+06	3.505e+06	5.31294e+06
M183T473	Benzophenone	183.081	472.6	182.073	0.677297	C13H10O	[M+H]+	Benzene and substituted derivatives	Benzophenones	C06354		119-61-9	HMDB0032049	mzCloud	2	pos	8.08177e+06	8.78624e+06	7.73118e+06	1.06416e+07	7.88337e+06	8.45588e+06	7.62935e+06	8.91186e+06	9.61922e+06	8.16058e+06	9.41507e+06	8.70374e+06	8.14273e+06	8.42456e+06	7.79257e+06	9.00058e+06	7.95699e+06	8.33278e+06	8.32045e+06	7.96109e+06	7.5076e+06	6.9606e+06	5.39671e+06	5.62807e+06
M193T485	(-)-Jasmonic acid	193.123	485.2	210.126	25.0307	C12H18O3	[M+H-H2O]+	Fatty Acyls	Lineolic acids and derivatives	C08491	Lipid metabolism; Signal transduction; Chemical structure transformation maps; Global and overview maps	c("6894-38-8", "59366-47-1")	HMDB0032797	mzCloud	2	pos	7.06509e+06	6.53351e+06	1.04607e+07	7.49533e+06	8.74254e+06	5.80808e+06	6.4978e+06	8.33743e+06	4.58204e+06	6.60612e+06	6.0982e+06	7.53798e+06	6.16689e+06	6.65114e+06	7.55993e+06	6.288e+06	4.73085e+06	7.41268e+06	5.49399e+06	9.79912e+06	2.51671e+07	1.25605e+07	5.50832e+06	6.91571e+06
M219T525	Nootkatone	219.175	524.7	218.167	2.84704	C15H22O	[M+H]+	Prenol lipids	Sesquiterpenoids	C17914		4674-50-4	HMDB0013687	mzCloud	2	pos	1.6204e+07	2.09618e+07	2.79663e+07	1.14109e+07	1.15803e+07	1.11076e+07	1.37878e+07	9.32032e+06	1.81138e+07	1.76446e+07	4.80809e+06	1.99291e+07	7.38266e+06	4.7218e+06	1.47577e+07	1.67171e+07	5.26468e+06	1.66096e+07	1.29633e+07	1.08194e+07	1.57712e+07	1.65542e+07	3.77567e+06	1.85017e+07
M251T517	OPEO	251.201	517.4	250.193	3.35954	C16H26O2	[M+H]+	Extractables/Leachables; Textile Chemicals/Auxiliary/Dyes		D05229				mzCloud	2	pos	1.94192e+06	755296	428740	3.24151e+06	448594	1.17735e+06	1.0234e+06	361049	833655	630522	642458	943257	970170	612456	619758	1.03546e+06	1.56014e+06	527796	1.31612e+06	1.26516e+06	603793	456117	8.34219e+06	362449
M250T411	Alprenolol	250.178	411.3	249.173	8.2141	C15H23NO2	[M+H]+	Therapeutics/Prescription Drugs		D07156				mzCloud	2	pos	5.51554e+07	5.76905e+07	7.83852e+07	5.17423e+07	5.77665e+07	3.73024e+07	5.2564e+07	4.49804e+07	5.66349e+07	4.0623e+07	1.19773e+07	3.95242e+07	5.90957e+07	3.85595e+07	4.29866e+07	4.75262e+07	5.60004e+07	5.97814e+07	5.60762e+07	5.25119e+07	4.77493e+07	6.81818e+07	5.3232e+07	3.92847e+07
M279T523	(9Z,11E,13E)-Octadecatrienoic acid	279.232	523	278.225	1.87657	C18H30O2	[M+H]+			C08315		506-23-0		mzCloud	2	pos	5.8919e+06	5.58918e+06	5.76981e+06	5.74556e+06	5.83959e+06	5.46011e+06	5.61736e+06	6.3388e+06	5.97563e+06	5.77612e+06	5.643e+06	5.24171e+06	5.89354e+06	5.42264e+06	5.81345e+06	5.81531e+06	5.87072e+06	5.70215e+06	5.72675e+06	5.49437e+06	5.60792e+06	5.86734e+06	5.8466e+06	6.06131e+06
M298T649	Tridemorph	298.311	649.1	297.303	0.415674	C19H39NO	[M+H]+	Oxazinanes	Morpholines	C11285		c("24602-86-6", "81412-43-3", "NA")	HMDB0031810	mzCloud	2	pos	1.69389e+07	9.62926e+06	1.79046e+07	1.57174e+07	1.3059e+07	9.39512e+06	1.07437e+06	1.13409e+07	9.15108e+06	7.46545e+06	2.73302e+06	6.23361e+06	1.09009e+07	6.74992e+06	8.05402e+06	1.49882e+07	8.97706e+06	1.15243e+07	9.32104e+06	1.2633e+07	1.02291e+07	1.34252e+07	685791	1.02282e+06
M303T530	Abietate	303.232	530.4	302.225	1.72805	C20H30O2	[M+H]+	Extractables/Leachables		C06087	Global and overview maps; Metabolism of terpenoids and polyketides	514-10-3		mzCloud	2	pos	1.40243e+06	8.13197e+07	188331	155519	151457	192312	125536	645637	3.48288e+06	2.2396e+06	3.37135e+06	1.07013e+06	505179	874474	1.0703e+06	109044	643258	152234	125745	936301	80931.3	73865.1	78592.5	89284.8
M326T601	Oleoylethanolamide	326.306	601.2	325.298	1.91232	C20H39NO2	[M+H]+	Organonitrogen compounds	Amines	C20792	Signal transduction	111-58-0	HMDB0002088	mzCloud	2	pos	2.54856e+06	3.29572e+06	2.07805e+06	2.01283e+06	2.34956e+06	2.1627e+06	1.83795e+06	1.81304e+06	2.05462e+06	1.83354e+06	2.0641e+06	2.57284e+06	1.55745e+06	2.16309e+06	1.79089e+06	2.07434e+06	3.122e+06	2.34819e+06	2.80244e+06	2.52434e+06	2.16473e+06	1.7414e+06	1.12542e+06	1.63162e+06
M310T537	N,N-Dimethylsphing-4-enine	310.311	537.1	327.314	14.9334	C20H41NO2	[M+H-H2O]+	Organonitrogen compounds	Amines	C13914		c("122314-67-4", "119567-63-4")	HMDB0013645	mzCloud	2	pos	3.54028e+08	2.08955e+08	4.89211e+08	1.16026e+08	6.51378e+07	2.43481e+08	8.4622e+06	3.69578e+08	1.84616e+08	1.06413e+08	2.20829e+08	4.52059e+07	6.01182e+07	1.37263e+08	2.07134e+08	5.37234e+07	2.34447e+08	2.87639e+08	1.03583e+08	2.52751e+08	2.40114e+08	6.09519e+07	7.51993e+07	7.92369e+07
M318T404	Phytosphingosine	318.302	404	317.293	6.6729	C18H39NO3	[M+H]+	Organonitrogen compounds	Amines	C12144	Lipid metabolism; Global and overview maps	554-62-1	HMDB0004610	mzCloud	2	pos	5.4524e+07	4.52135e+07	4.4639e+07	5.48612e+07	3.52652e+07	4.59706e+07	1.17433e+08	5.56864e+07	1.33349e+08	6.96514e+07	4.74052e+07	6.45905e+07	1.40278e+08	5.13782e+07	7.6045e+07	6.14255e+07	5.17642e+07	6.073e+07	8.56095e+07	7.81712e+07	8.25206e+07	9.29882e+07	5.24293e+07	6.07113e+07
M327T513_1	Triphenyl phosphate	327.079	512.6	326.071	1.60206	C18H15O4P	[M+H]+	Extractables/Leachables; Industrial Chemicals		C14235		115-86-6		mzCloud	2	pos	1.0477e+06	1.79055e+06	1.25035e+06	1.36454e+06	1.89929e+06	1.48358e+06	1.21251e+06	1.31343e+06	1.39823e+06	850384	1.27871e+06	1.57698e+06	1.88679e+06	1.47133e+06	1.08439e+06	1.21167e+06	1.71557e+06	845224	1.27354e+06	1.22088e+06	1.16329e+06	1.16173e+06	1.11756e+06	1.45771e+06
M337T385	4-Chloro-17alpha-methyl-17beta-hydroxy-4-androsten-3-one	337.199	384.6	336.186	17.5683	C20H29ClO2	[M+H]+	Drugs of Abuse/Illegal Drugs; Sports Doping Drugs		C15358				mzCloud	2	pos	1.10756e+06	1.83599e+06	1.22631e+06	1.00313e+06	1.28915e+06	1.65028e+06	1.03752e+06	1.12349e+06	1.22949e+06	716826	356640	1.03245e+06	1.64593e+06	1.31382e+06	777613	1.48057e+06	1.22019e+06	941176	1.41292e+06	1.20028e+06	1.11649e+06	1.12299e+06	838997	1.17053e+06
M399T537	Tris(butoxyethyl)phosphate	399.251	536.8	398.243	1.31246	C18H39O7P	[M+H]+	Extractables/Leachables; Textile Chemicals/Auxiliary/Dyes; Industrial Chemicals		C14446		78-51-3		mzCloud	2	pos	4.05672e+06	1.3106e+07	2.40288e+07	3.79829e+06	9.28945e+06	1.2183e+07	2.99717e+06	1.46521e+07	1.58811e+07	4.90433e+06	7.5736e+06	8.97068e+06	1.52501e+07	1.89254e+06	1.16619e+07	3.54998e+06	1.20258e+07	1.56335e+07	1.18934e+07	1.11708e+07	1.20849e+07	1.38936e+07	1.07755e+07	1.07352e+07
M457T621	Oleanolic acid	457.367	620.9	456.36	1.04074	C30H48O3	[M+H]+	Prenol lipids	Triterpenoids	C17148		508-02-1	HMDB0002364	mzCloud	2	pos	2.73624e+06	424022	6.02566e+07	1.36154e+06	3.19675e+06	3.25432e+06	221839	1.63431e+06	2.26603e+06	1.38199e+06	2.04342e+06	620786	2.07317e+06	600874	1.68042e+06	512100	9.45463e+07	1.35828e+08	8.14653e+07	7.94075e+07	1.36147e+07	1.56648e+07	1.08494e+07	2.62128e+07
M453T556	Glycyrrhetinate	453.336	556.3	470.34	7.35438	C30H46O4	[M+H-H2O]+	Prenol lipids	Triterpenoids	C02283		c("1449-05-4", "471-53-4")	HMDB0011628	mzCloud	2	pos	2.39944e+07	1.17714e+07	1.57944e+07	5.0831e+06	1.27965e+07	1.1025e+07	8.69669e+06	1.16515e+07	6.31351e+06	6.03865e+06	4.47181e+06	4.34946e+06	1.74489e+06	1.23503e+06	1.39714e+06	1.1692e+06	5.27116e+06	9.3387e+06	1.06928e+07	1.41272e+07	7.912e+06	8.50291e+06	1.13021e+07	4.79739e+06
M487T48_1	Raffinose	487.164	48.1	504.169	5.4068	C18H32O16	[M+H-H2O]+	Organooxygen compounds	Carbohydrates and carbohydrate conjugates	C00492	Carbohydrate metabolism; Membrane transport; Global and overview maps	512-69-6	HMDB0003213	mzCloud	2	pos	1.32077e+06	1.03095e+06	3.22939e+06	2.1816e+06	3.11081e+06	4.29118e+06	2.64736e+06	648649	3.08074e+06	1.99476e+06	2.35215e+06	2.28945e+06	3.68942e+06	4.90426e+06	6.51805e+06	3.03754e+06	1.99317e+06	9.50419e+06	3.25817e+06	5.78768e+06	1.60841e+07	9.52165e+06	4.78061e+06	4.83056e+06
M489T439	Asiatic acid	489.357	439	488.35	1.38141	C30H48O5	[M+H]+			C08617		464-92-6		mzCloud	2	pos	620393	358036	466218	4.57528e+06	1.81793e+06	715777	2.45769e+06	2.18862e+06	2.70404e+06	2.73135e+06	2.97495e+06	3.05216e+06	2.3302e+06	1.90062e+06	2.17834e+06	1.56644e+06	2.91383e+06	2.10949e+06	2.68411e+06	1.92167e+06	709587	3.2422e+06	561519	3.58457e+06
M102T297_1	(S)-Methylmalonic acid semialdehyde	102.034	297.1	102.032	0.0855655	C4H6O3	[M]+	Organooxygen compounds	Carbonyl compounds	C06002	Carbohydrate metabolism; Amino acid metabolism; Xenobiotics biodegradation and metabolism; Global and overview maps	99043-16-0	HMDB0002217	BioDeepDB	2	pos	2.8472e+06	2.28244e+07	2.74595e+06	2.70629e+06	1.05116e+07	1.12393e+07	2.77792e+06	9.57367e+06	2.78301e+06	2.80097e+06	2.8425e+06	2.7885e+06	2.98361e+06	1.62406e+07	2.12413e+07	1.62216e+06	1.8051e+07	3.02155e+06	3.04469e+06	3.1813e+06	2.98423e+06	9.16545e+06	2.98244e+06	2.99991e+06
M102T226	5-Aminopentanal	102.091	226.3	101.084	3.68299	C5H11NO	[M+H]+	Organooxygen compounds	Carbonyl compounds	C12455	Amino acid metabolism; Biosynthesis of other secondary metabolites; Global and overview maps		HMDB0012815	BioDeepDB	2	pos	2.7498e+06	1.89812e+06	1.536e+06	2.16467e+06	2.64089e+06	2.15975e+06	1.65102e+06	1.84453e+07	8.24943e+06	1.17102e+06	1.57494e+06	3.39174e+07	4.61699e+06	6.89881e+06	5.00516e+06	1.99577e+07	6.5947e+06	8.76042e+06	1.05517e+07	5.14961e+06	1.59769e+07	4.24461e+06	1.37485e+07	1.94432e+06
M107T411	Benzaldehyde	107.049	411.1	106.042	0.000391417	C7H6O	[M+H]+	Benzene and substituted derivatives	Benzoyl derivatives	C00261	Xenobiotics biodegradation and metabolism; Global and overview maps	100-52-7	HMDB0006115	BioDeepDB	2	pos	917924	815581	971635	942676	972082	890631	843802	957392	882770	1.01734e+06	921372	921156	946980	887893	843385	829924	916490	832879	779722	894574	903083	880734	924027	994016
M114T210	Epsilon-caprolactam	114.091	210.1	113.084	1.97148	C6H11NO	[M+H]+	Lactams	Caprolactams	C06593	Xenobiotics biodegradation and metabolism; Global and overview maps	105-60-2	HMDB0062769	BioDeepDB	2	pos	3.32999e+07	2.75728e+07	3.00035e+07	2.9657e+07	1.91787e+07	2.01982e+07	1.83471e+07	1.69779e+07	1.87351e+07	1.9313e+07	1.84794e+07	3.13827e+07	1.862e+07	3.13089e+07	1.88203e+07	1.7788e+07	1.16541e+07	1.76808e+07	1.46915e+07	1.49067e+07	1.55073e+07	1.73346e+07	1.69272e+07	1.91155e+07
M119T464_1	Aminomalonic acid	119.015	463.6	119.022	12.6282	C3H5NO4	[M]+	Carboxylic acids and derivatives	Amino acids, peptides, and analogues	C00872		1068-84-4	HMDB0001147	BioDeepDB	2	pos	4.74397e+06	4.39503e+06	4.59371e+06	4.90314e+06	1.44861e+07	4.16033e+06	1.85056e+07	9.53691e+06	4.46303e+06	1.22045e+07	1.85609e+07	1.36595e+06	3.85539e+06	6.74452e+06	8.73487e+06	1.39555e+07	1.39486e+07	2.22907e+07	1.03406e+07	3.39179e+06	1.23314e+07	8.81668e+06	1.06345e+07	8.93713e+06
M119T358	5-Hydroxypentanoic acid	119.07	357.8	118.063	1.88124	C5H10O3	[M+H]+	Fatty Acyls	Fatty acids and conjugates	C02804		13392-69-3	HMDB0061927	BioDeepDB	2	pos	157754	226635	221219	161253	162852	291767	186893	132305	167780	173729	235302	273831	177715	173888	169378	254457	535487	112254	184364	150189	182751	178273	351796	327713
M123T72	Niacinamide	123.056	72.2	122.048	0.0013682	C6H6N2O	[M+H]+	Pyridines and derivatives	Pyridinecarboxylic acids and derivatives	C00153	Metabolism of cofactors and vitamins; Global and overview maps; Aging; Digestive system	98-92-0	HMDB0001406	BioDeepDB	2	pos	1.63289e+07	1.14725e+07	1.55378e+07	1.50129e+07	1.86333e+06	2.1969e+06	2.7581e+06	1.66591e+06	2.43177e+06	2.86104e+06	3.37613e+06	2.24437e+06	12877.8	11746.8	32185.1	1.5487e+06	8.06835e+06	9.2184e+06	7.90828e+06	8.536e+06	4.06994e+06	4.38771e+06	3.57968e+06	3.61715e+06
M127T48	Triacetate lactone	127.039	48.3	126.032	0.00731532	C6H6O3	[M+H]+			C02752		675-10-5		BioDeepDB	2	pos	3.05317e+07	2.62999e+07	2.90985e+07	3.21622e+07	6.94556e+06	7.21918e+06	8.23672e+06	6.43005e+06	7.91321e+06	8.73651e+06	9.86567e+06	7.28224e+06	1.75829e+06	2.01869e+06	1.33145e+06	6.92805e+06	2.06293e+07	2.28178e+07	2.11544e+07	1.97252e+07	1.11671e+07	1.09926e+07	1.05281e+07	1.03314e+07
M130T40_2	Mesaconate	130.017	40.3	130.027	0.0518262	C5H6O4	[M]+			C01732	Carbohydrate metabolism; Global and overview maps	498-24-8		BioDeepDB	2	pos	1.93e+06	1.68128e+06	1.35697e+06	1.68576e+06	1.00872e+06	1.34969e+06	1.31482e+06	1.08545e+06	1.21127e+06	1.07634e+06	1.35858e+06	1.17329e+06	898676	974143	934704	1.08538e+06	1.23998e+06	1.44855e+06	1.39217e+06	1.27405e+06	1.16135e+06	868137	832437	752295
M132T572	N-Carbamoylputrescine	132.103	572.2	131.106	6.99542	C5H13N3O	[M+H]+	Carboximidic acids and derivatives	Carboximidic acids	C00436	Amino acid metabolism; Global and overview maps	6851-51-0	HMDB0033458	BioDeepDB	2	pos	2.09847e+07	3.75363e+07	2.76677e+07	1.95115e+07	2.44539e+07	1.63797e+07	5.28071e+06	1.91016e+07	2.03623e+07	1.81312e+07	3.78592e+07	1.80784e+07	2.98516e+06	1.41712e+07	2.33688e+07	2.44716e+07	1.279e+07	2.31133e+07	3.02924e+07	1.81807e+07	1.44305e+07	6.84138e+06	2.84592e+06	1.49633e+07
M137T72_1	Hypoxanthine	137.046	72.4	136.038	0.00411309	C5H4N4O	[M+H]+	Imidazopyrimidines	Purines and purine derivatives	C00262	Global and overview maps; Nucleotide metabolism	68-94-0	HMDB0000157	BioDeepDB	2	pos	791305	746977	776267	769638	1.34377e+06	1.30767e+06	1.52619e+06	1.11417e+06	740567	965570	946137	794356	834065	705574	903008	891618	1.36438e+06	1.81541e+06	1.61155e+06	1.57336e+06	1.00784e+06	1.03418e+06	1.1235e+06	1.34361e+06
M140T487	Acetylphosphate	139.988	486.5	139.988	0.681092	C2H5O5P	[M]+	Organic phosphoric acids and derivatives	Phosphate esters	C00227	Carbohydrate metabolism; Energy metabolism; Metabolism of other amino acids; Global and overview maps	590-54-5	HMDB0001494	BioDeepDB	2	pos	1.18383e+07	1.15684e+07	1.03975e+07	1.0338e+07	1.20062e+07	1.24186e+07	1.11554e+07	1.1075e+07	9.73973e+06	1.0995e+07	1.04511e+07	1.10278e+07	1.15421e+07	1.08082e+07	1.05702e+07	7.68829e+06	9.27996e+06	1.00131e+07	9.4957e+06	1.06397e+07	9.83478e+06	9.27405e+06	9.49996e+06	9.88938e+06
M140T412	4-Amino-5-hydroxymethyl-2-methylpyrimidine	140.082	412.2	139.075	3.02679	C6H9N3O	[M+H]+			C01279	Metabolism of cofactors and vitamins; Global and overview maps; Membrane transport	73-67-6		BioDeepDB	2	pos	935369	4.96425e+06	2.21322e+06	4.21959e+06	7.01824e+06	1.8435e+06	1.15817e+06	2.30346e+06	2.94587e+06	2.67552e+06	3.47084e+06	4.0947e+06	1.05398e+06	2.12312e+06	2.67531e+06	3.33634e+06	3.21236e+06	1.63883e+06	2.13009e+06	3.37016e+06	3.97241e+06	979053	555520	815586
M146T320	2-Dehydropantoate	146.06	320.4	146.058	0.0338082	C6H10O4	[M]+			C00966	Metabolism of cofactors and vitamins; Global and overview maps	470-30-4		BioDeepDB	2	pos	1.72175e+06	1.61914e+06	1.69815e+06	1.4749e+06	1.85746e+06	1.55767e+06	1.64589e+06	1.60317e+06	1.71997e+06	1.98204e+06	1.7835e+06	1.7381e+06	1.52033e+06	1.16993e+06	1.31267e+06	1.12989e+06	2.18608e+06	2.91105e+06	2.55192e+06	2.67939e+06	1.53761e+06	1.47192e+06	1.56919e+06	1.75143e+06
M154T190	2-Pyrocatechuic acid	154.042	190	154.027	4.78241	C7H6O4	[M]+	Benzene and substituted derivatives	Benzoic acids and derivatives	C00196	Chemical structure transformation maps; Xenobiotics biodegradation and metabolism; Global and overview maps; Metabolism of terpenoids and polyketides	303-38-8	HMDB0000397	BioDeepDB	2	pos	3.28041e+06	3.02842e+06	3.34334e+06	3.06313e+06	3.47794e+06	3.24348e+06	3.71914e+06	3.14644e+06	1.36882e+06	1.49641e+06	1.82944e+06	1.26039e+06	1.41556e+06	1.30546e+06	1.39745e+06	1.36139e+06	4.21374e+06	4.91445e+06	3.82609e+06	4.09147e+06	1.61238e+06	1.53934e+06	1.63401e+06	1.7234e+06
M161T492	N(6)-Methyllysine	161.133	491.7	160.121	1.48207	C7H16N2O2	[M+H]+	Carboxylic acids and derivatives	Amino acids, peptides, and analogues	C02728		1188-07-4 / 7622-29-9	HMDB0002038	BioDeepDB	2	pos	816618	475087	1.0816e+06	694103	2.32197e+06	903415	1.8068e+06	1.82834e+06	636585	647470	612541	564567	578431	581494	701774	793782	337570	638504	1.12609e+06	587230	1.14656e+06	540362	992831	976950
M163T48	3-Hydroxymethylglutaric acid	163.061	48.4	162.053	5.05333	C6H10O5	[M+H]+	Fatty Acyls	Fatty acids and conjugates	C03761		503-49-1	HMDB0000355	BioDeepDB	2	pos	7.5507e+06	6.79585e+06	7.52532e+06	7.9586e+06	7.46324e+06	7.63337e+06	7.5403e+06	7.37269e+06	6.99303e+06	7.07164e+06	9.97785e+06	7.69803e+06	7.21781e+06	7.26985e+06	8.70078e+06	8.30385e+06	7.21166e+06	8.28549e+06	8.02359e+06	7.75749e+06	9.93974e+06	8.68199e+06	7.37716e+06	7.31543e+06
M163T536	Isosafrole	163.076	536.2	162.068	3.83264	C10H10O2	[M+H]+			C10472		120-58-1		BioDeepDB	2	pos	1.94223e+07	1.99635e+07	1.40659e+07	1.26491e+07	5.68328e+06	1.53478e+07	1.23608e+07	6.27961e+06	7.51372e+06	9.47642e+06	9.20838e+06	1.07039e+07	2.22257e+07	1.07965e+07	8.77353e+06	9.12494e+06	1.47883e+07	1.64498e+07	1.44746e+07	1.33391e+07	1.1823e+07	1.11301e+07	1.15753e+07	1.4246e+07
M163T411	2-Deoxystreptamine	163.112	411.1	162.1	2.19594	C6H14N2O3	[M+H]+			C02627	Biosynthesis of other secondary metabolites; Global and overview maps	2037-48-1		BioDeepDB	2	pos	2.13007e+07	8.12284e+06	1.64946e+07	1.55432e+07	1.65928e+07	1.17828e+07	5.9841e+06	6.99502e+06	1.58673e+07	7.15102e+06	1.13263e+07	1.83492e+07	1.59079e+07	1.6162e+07	1.83115e+07	1.47478e+07	8.5194e+06	1.44288e+07	7.15351e+06	1.51195e+07	6.78968e+06	1.70183e+07	7.35639e+06	9.6744e+06
M167T484	3-(2-Hydroxyphenyl)propanoic acid	167.071	484.4	166.063	0.490933	C9H10O3	[M+H]+	Phenylpropanoic acids		C01198	Amino acid metabolism; Xenobiotics biodegradation and metabolism; Global and overview maps	495-78-3	HMDB0033752	BioDeepDB	2	pos	3.11892e+07	7.51993e+06	4.82458e+07	8.10046e+06	3.75544e+07	7.82485e+06	4.80324e+07	4.43063e+07	5.72618e+06	4.03828e+06	2.08676e+07	1.03908e+08	9.19599e+07	1.60647e+07	7.74197e+06	3.86891e+07	2.44479e+07	2.99875e+07	3.88592e+06	4.57434e+07	2.66404e+07	1.48476e+07	1.86869e+07	1.06813e+08
M170T33	Selenocysteine	169.979	32.6	168.964	8.46442	C3H7NO2Se	[M+H]+	Carboxylic acids and derivatives	Amino acids, peptides, and analogues	C05688	Metabolism of other amino acids; Global and overview maps	3614-08-2 / 10236-58-5	HMDB0003288	BioDeepDB	2	pos	1.50183e+07	1.34672e+07	1.84894e+07	1.77004e+07	1.18328e+07	1.25502e+07	1.31933e+07	1.23929e+07	6.3477e+06	7.79225e+06	7.24912e+06	5.8852e+06	4.80577e+06	5.42539e+06	5.16172e+06	5.61607e+06	2.90049e+06	3.32805e+06	2.79522e+06	2.53849e+06	1.68747e+06	1.60648e+06	1.72427e+06	1.3152e+06
M170T559	8-Amino-7-oxononanoate	170.118	559.5	187.121	26.6521	C9H17NO3	[M+H-H2O]+			C01092	Metabolism of cofactors and vitamins; Global and overview maps	4707-58-8		BioDeepDB	2	pos	1.40097e+07	1.36934e+07	7.55635e+06	1.33137e+07	1.21508e+07	1.42351e+07	1.39285e+07	1.36248e+07	1.31119e+07	1.29951e+07	1.32833e+07	1.32237e+07	1.33129e+07	1.12977e+07	1.21342e+07	1.26155e+07	1.1342e+07	1.29543e+07	1.24656e+07	1.24549e+07	1.31491e+07	1.21897e+07	1.18926e+07	1.20244e+07
M172T559	Gabapentin	172.134	559.2	171.126	0.034607	C9H17NO2	[M+H]+			C07018		60142-96-3		BioDeepDB	2	pos	5.56377e+06	5.24879e+06	5.41898e+06	4.67417e+06	1.89701e+06	797999	2.48727e+06	1.46911e+06	3.55374e+06	3.88607e+06	3.33783e+06	4.62874e+06	3.13879e+06	2.72117e+06	5.22353e+06	5.36431e+06	2.07807e+06	2.68807e+06	2.43074e+06	2.88655e+06	4.89164e+06	4.55241e+06	3.75192e+06	6.06874e+06
M173T309	2-Oxoarginine	173.083	309.4	173.08	20.2215	C6H11N3O3	[M]+	Keto acids and derivatives	Short-chain keto acids and derivatives	C03771	Amino acid metabolism; Global and overview maps	3715-10-4	HMDB0004225	BioDeepDB	2	pos	2.18549e+06	1.60074e+06	1.84139e+06	2.01124e+06	1.69526e+06	1.72755e+06	1.56602e+06	1.3896e+06	1.40466e+06	1.67196e+06	1.47745e+06	1.31736e+06	1.56404e+06	1.55301e+06	1.09739e+06	1.52523e+06	1.82792e+06	2.07422e+06	1.94245e+06	1.63545e+06	2.33682e+06	2.12131e+06	2.38823e+06	2.39017e+06
M194T287	3,4-Methylenedioxyamphetamine	194.115	286.8	193.11	1.52722	C11H15NO2	[M+H]+	Benzodioxoles		C07577		4764-17-4 / 42542-10-9	HMDB0041931	BioDeepDB	2	pos	2.31317e+07	1.22178e+07	2.45889e+07	1.45826e+07	1.60508e+07	2.46133e+07	1.66467e+07	1.34389e+07	1.44567e+07	1.39389e+07	1.49297e+07	1.34972e+07	2.25726e+07	1.33172e+07	1.56493e+07	1.61204e+07	1.61517e+07	1.52753e+07	1.62327e+07	1.82784e+07	1.4997e+07	1.51584e+07	1.76884e+07	2.59892e+07
M181T206	Beta-Tyrosine	181.073	205.8	181.074	7.17944	C9H11NO3	[M]+	Carboxylic acids and derivatives	Amino acids, peptides, and analogues	C04368	Amino acid metabolism		HMDB0003831	BioDeepDB	2	pos	1.62863e+06	1.44559e+06	1.60853e+06	1.34044e+06	1.30665e+06	666931	1.47635e+06	1.24135e+06	1.05398e+06	945500	162307	904301	1.26624e+06	768766	968826	1.34692e+06	1.38049e+06	1.36912e+06	1.63088e+06	1.16288e+06	1.04368e+06	2.01579e+06	1.3109e+06	949374
M192T414	N,N-Diethyl-m-toluamide	192.139	414.5	191.131	1.72433	C12H17NO	[M+H]+			C10935		134-62-3		BioDeepDB	2	pos	4.68005e+06	2.64825e+06	3.46717e+06	2.3877e+06	2.83246e+06	4.2375e+06	2.29661e+06	6.07029e+06	2.5366e+06	2.00003e+06	2.40381e+06	2.1874e+06	4.20468e+06	2.0323e+06	2.00963e+06	2.37521e+06	2.22298e+06	2.96577e+06	3.81384e+06	2.80383e+06	2.27817e+06	2.06403e+06	2.26866e+06	3.77555e+06
M193T240	Sinapyl alcohol	193.087	239.8	210.089	0.708954	C11H14O4	[M+H-H2O]+	Phenols	Methoxyphenols	C02325	Chemical structure transformation maps; Biosynthesis of other secondary metabolites; Global and overview maps	537-33-7	HMDB0013070	BioDeepDB	2	pos	121871	123187	118598	127322	116885	112376	114459	112549	117105	114806	115687	115038	111784	110857	102624	108559	1.5626e+06	1.11033e+07	198531	530889	421575	635690	266663	3.54638e+06
M214T265	Baclofen	214.063	265.1	213.056	1.08538	C10H12ClNO2	[M+H]+			C06841		1134-47-0		BioDeepDB	2	pos	3.76285e+06	2.68798e+06	4.66611e+06	2.75373e+06	3.23402e+06	2.79036e+06	3.10555e+06	2.45462e+06	2.42104e+06	3.15215e+06	2.09817e+06	3.74864e+06	2.49442e+06	1.8406e+06	3.68686e+06	1.93901e+06	2.27945e+06	4.4777e+06	2.7978e+06	2.73747e+06	3.51978e+06	2.33815e+06	1.98777e+06	1.84892e+06
M217T309	N-a-Acetylcitrulline	217.108	309.5	217.106	0.738627	C8H15N3O4	[M]+	Carboxylic acids and derivatives	Amino acids, peptides, and analogues	C15532	Amino acid metabolism; Global and overview maps	33965-42-3	HMDB0000856	BioDeepDB	2	pos	1.65656e+07	1.63469e+07	1.90437e+07	1.76406e+07	2.31693e+07	2.03753e+07	2.60694e+07	2.61202e+07	1.30213e+07	1.32804e+07	1.23811e+07	1.35004e+07	7.6782e+06	7.63177e+06	7.53698e+06	6.65694e+06	8.51466e+06	9.4611e+06	7.29363e+06	8.54677e+06	8.51455e+06	6.67457e+06	9.32686e+06	7.50711e+06
M221T434	2-trans,6-trans-Farnesal	221.19	434	220.183	0.000729187	C15H24O	[M+H]+	Prenol lipids	Sesquiterpenoids	C03461	Global and overview maps; Metabolism of terpenoids and polyketides	502-67-0 / 19317-11-4	HMDB0060356	BioDeepDB	2	pos	796014	681783	842769	853677	814424	685828	232459	366808	1.01527e+06	734374	826913	1.21423e+06	1.06041e+07	6.6658e+06	991173	943735	500025	523923	547138	523086	558288	508486	207809	147047
M223T448	Apiole	223.097	448	222.089	1.45228	C12H14O4	[M+H]+	Benzodioxoles		C10429		523-80-8	HMDB0033776	BioDeepDB	2	pos	1.2027e+06	1.36453e+06	1.33324e+06	1.39808e+06	1.177e+06	1.38292e+06	1.45688e+06	1.26294e+06	2.07454e+06	1.25224e+06	1.21586e+06	1.37596e+06	1.33755e+06	1.29916e+06	1.17863e+06	1.38895e+06	1.29253e+06	1.40285e+06	1.41701e+06	1.23084e+06	1.40366e+06	1.48196e+06	1.33194e+06	1.24895e+06
M233T436	Isoalantolactone	233.154	436.2	232.146	0.471005	C15H20O2	[M+H]+	Prenol lipids	Terpene lactones	C09484		470-17-7	HMDB0035934	BioDeepDB	2	pos	1.27602e+07	1.11291e+07	1.20847e+07	1.05855e+07	1.3492e+06	1.26594e+06	1.68469e+06	1.17011e+06	1.51672e+06	1.72522e+06	1.91662e+06	1.24622e+06	128256	139563	70259.4	782574	5.88017e+06	6.42155e+06	6.06241e+06	5.71962e+06	2.32498e+06	2.27391e+06	2.25104e+06	2.1541e+06
M235T415	Confertifolin	235.169	414.6	234.162	0.0114763	C15H22O2	[M+H]+			C09376		1811-23-0		BioDeepDB	2	pos	2.1299e+06	1.81864e+06	2.29401e+06	1.89322e+06	2.26336e+06	2.47359e+06	2.35359e+06	2.25886e+06	2.44066e+06	2.72036e+06	2.69827e+06	2.67553e+06	2.36874e+06	2.32175e+06	2.05266e+06	2.14512e+06	2.90349e+06	2.74804e+06	2.51091e+06	2.54927e+06	2.29782e+06	2.41104e+06	2.29791e+06	2.35726e+06
M247T418	alpha-Santonin	247.133	417.5	246.126	2.52495	C15H18O3	[M+H]+			C02206		481-06-1		BioDeepDB	2	pos	891451	813327	783339	905033	225181	283753	421039	278988	193502	175485	262229	147387	131388	118656	64820.4	56109.3	976533	1.04531e+06	879188	917624	515922	491583	457130	482940
M280T490	3-Ketosphingosine	280.265	489.7	297.267	18.6752	C18H35NO2	[M+H-H2O]+			C06121				BioDeepDB	2	pos	1.85135e+06	1.77122e+06	1.41827e+07	7.55662e+06	1.51124e+07	1.89243e+07	1.40683e+07	7.41757e+06	7.47175e+06	1.60913e+07	1.02999e+07	9.20882e+06	8.82874e+06	8.501e+06	2.55654e+06	1.18059e+07	1.46291e+06	1.40267e+07	1.30467e+07	1.28417e+06	1.03983e+07	9.08656e+06	2.6578e+06	1.04326e+06
M283T262	4-(beta-D-Glucosyloxy)benzoate	283.081	262.1	300.084	14.2503	C13H16O8	[M+H-H2O]+			C03993	Metabolism of cofactors and vitamins			BioDeepDB	2	pos	7.76225e+06	786465	1.04972e+06	604982	1.45564e+06	536573	885475	1517.63	512375	4788.95	649049	453211	509787	1812.83	545678	273929	1.98967e+06	1.24921e+07	126429	498280	607993	646405	345309	4.23512e+06
M284T630	Sphinganine	284.295	629.9	301.298	13.8378	C18H39NO2	[M+H-H2O]+	Organonitrogen compounds	Amines	C00836	Lipid metabolism; Signal transduction; Global and overview maps	764-22-7	HMDB0000269	BioDeepDB	2	pos	1.1463e+08	1.19051e+08	1.70766e+08	8.44013e+07	2.64835e+08	1.67408e+08	1.10938e+09	1.2949e+08	1.55348e+08	2.00185e+08	1.69723e+08	2.91359e+08	1.94879e+08	1.30002e+09	2.91936e+08	1.5197e+09	1.18996e+08	1.84539e+08	2.12367e+08	1.63443e+08	1.9753e+08	2.25522e+08	1.32209e+08	1.27192e+08
M293T495	12-OPDA	293.211	495.1	292.204	0.111297	C18H28O3	[M+H]+			C01226	Lipid metabolism; Global and overview maps	67204-66-4 / 85551-10-6		BioDeepDB	2	pos	4.5083e+06	3.43726e+06	3.7003e+06	2.8308e+06	1.26558e+06	2.5237e+06	314784	816112	4.92796e+06	5.03543e+06	3.06555e+06	5.1612e+06	670599	4.35392e+06	2.57061e+06	633625	1.00755e+07	2.76079e+06	9.4294e+06	4.85535e+06	4.05986e+06	5.89516e+06	7.46134e+06	7.73149e+06
M295T415	9(S)-HOT	295.227	414.6	294.219	0.596152	C18H30O3	[M+H]+			C16326	Lipid metabolism	89886-42-0		BioDeepDB	2	pos	3.50969e+06	983570	704699	5.00537e+06	1.88193e+06	859791	1.11819e+06	1.13282e+06	86498.2	2.87162e+06	2.25856e+06	2.35513e+06	313432	1.05421e+06	5.01423e+06	2.69051e+06	2.74158e+06	3.16855e+06	442089	456831	2.58691e+06	2.83597e+06	976093	1.36549e+06
M298T544	Spiroxamine	298.274	544.4	297.267	0.101243	C18H35NO2	[M+H]+			C11124		118134-30-8		BioDeepDB	2	pos	907629	407884	2.60333e+06	511317	4.26251e+06	1.4841e+06	1.40281e+06	3.28321e+06	1.28774e+06	2.66839e+06	2.28929e+06	6.23189e+06	3.80006e+06	1.66981e+06	2.88337e+06	2.07931e+06	2.37578e+06	3.64567e+06	1.57485e+06	1.55434e+06	2.72256e+06	4.1077e+06	2.69355e+06	3.98113e+06
M299T449	Norethindrone	299.201	448.9	298.193	0.0802137	C20H26O2	[M+H]+	Steroids and steroid derivatives	Estrane steroids	C05028		68-22-4	HMDB0014855	BioDeepDB	2	pos	511094	365367	190408	402279	403807	457186	436439	763089	4.05309e+06	8.22091e+06	2.49258e+07	3.55278e+06	5.99288e+06	1.7756e+06	3.47403e+06	1.52235e+06	659215	729632	606630	577611	646536	747753	379344	1.21347e+06
M301T476	9-cis-Retinoic acid	301.216	475.9	300.209	0.079677	C20H28O2	[M+H]+	Prenol lipids	Retinoids	C15493	Cancer: overview; Metabolism of cofactors and vitamins; Endocrine system; Cancer: specific types; Immune system	5300-03-8	HMDB0002369	BioDeepDB	2	pos	2.77561e+06	2.09018e+06	2.61408e+06	3.18348e+06	3.01191e+06	2.97991e+06	2.97528e+06	3.34187e+06	940771	1.17485e+06	973887	900625	1.3084e+06	948555	1.35186e+06	1.28701e+06	4.46962e+06	4.64547e+06	4.60227e+06	4.40593e+06	4.4574e+06	5.77856e+06	2.89179e+06	5.25538e+06
M314T473	Progesterone	314.232	472.9	314.225	24.1859	C21H30O2	[M]+	Steroids and steroid derivatives	Pregnane steroids	C00410	Endocrine and metabolic disease; Cancer: overview; Cell growth and death; Endocrine system; Lipid metabolism; Cancer: specific types; Target-based classification: Nuclear receptors; Global and overview maps	57-83-0	HMDB0001830	BioDeepDB	2	pos	469708	700952	639731	772246	719774	704549	905959	845692	1.05688e+06	754471	819702	625964	763177	657265	1.52893e+06	944660	596437	589092	506123	587143	783671	1.1059e+06	609842	428886
M337T438	Prostaglandin E1	337.236	438.4	354.241	0.605924	C20H34O5	[M+H-H2O]+	Fatty Acyls	Eicosanoids	C04741		745-65-3	HMDB0001442	BioDeepDB	2	pos	1.76009e+06	1.32726e+06	1.96619e+06	1.45017e+06	1.27639e+06	2.08579e+06	4.88716e+06	4.16685e+06	531302	492989	671319	430914	625985	242379	408772	77637	1.61519e+06	1.68205e+06	1.15604e+06	1.61992e+06	557313	581699	867323	1.47084e+06
M349T561	17alpha,21-Dihydroxypregnenolone	349.237	561.1	348.23	0.217617	C21H32O4	[M+H]+	Steroids and steroid derivatives	Hydroxysteroids	C05487	Lipid metabolism	1167-48-2	HMDB0006762	BioDeepDB	2	pos	3.12268e+06	1.31876e+06	2.36223e+06	1.90095e+06	1.39234e+06	2.62082e+06	1.29952e+06	1.26556e+06	1.28953e+06	2.16814e+06	2.18639e+06	1.38611e+06	2.47744e+06	1.61763e+06	1.25853e+06	1.3458e+06	1.07565e+06	1.5203e+06	1.63822e+06	1.27788e+06	1.44037e+06	1.32264e+06	1.34115e+06	2.20964e+06
M349T558	2-Hydroxy-6-pentadecylbenzoic acid	349.275	558.4	348.266	1.74653	C22H36O3	[M+H]+	Benzene and substituted derivatives	Benzoic acids and derivatives	C10759		16611-84-0	HMDB0029683	BioDeepDB	2	pos	675344	1.26505e+07	1.56467e+07	3.87705e+07	1.22698e+07	1.23361e+06	1.97884e+07	7.6926e+06	8.5922e+06	2.20949e+06	1.30024e+07	2.018e+07	5.08909e+06	1.10524e+07	1.88416e+07	9.56849e+06	1.33217e+06	1.91323e+07	1.04582e+07	1.46109e+07	7.97442e+07	2.20265e+07	8.54681e+06	1.10661e+07
M351T388_1	Misoprostol	351.252	388.2	368.256	1.80608	C21H36O5	[M+H-H2O]+			C07227		59122-46-2		BioDeepDB	2	pos	5.69756e+06	6.34574e+06	7.41299e+06	6.9865e+06	3.94936e+06	6.7771e+06	1.07497e+07	9.32121e+06	1.25938e+06	3.84388e+06	5.72787e+06	5.66418e+06	3.25342e+06	1.96419e+06	3.66224e+06	274844	3.49866e+06	3.93628e+06	662630	3.31359e+06	3.42191e+06	4.33148e+06	5.08675e+06	7.60648e+06
M353T528	Bursehernin	353.139	528	370.142	12.556	C21H22O6	[M+H-H2O]+			C21183	Biosynthesis of other secondary metabolites; Global and overview maps	40456-51-7		BioDeepDB	2	pos	704629	535619	653812	1.01867e+06	967054	753436	862085	699624	817044	658363	1.16593e+06	739303	802358	821428	707301	774511	954626	390743	718908	670698	688335	907222	448594	647138
M367T447	Zymosterol intermediate 2	367.321	447.2	384.339	28.4928	C27H44O	[M+H-H2O]+	Steroids and steroid derivatives	Cholestane steroids	C05437	Lipid metabolism; Global and overview maps	128-33-6	HMDB0006271	BioDeepDB	2	pos	773099	697554	809968	882831	833789	843289	617680	770346	812451	760508	805564	933106	671775	584395	717841	746597	1.01365e+06	1.59847e+06	1.0877e+06	1.08589e+06	790260	688372	1.04503e+06	969589
M377T683	Ergosta-5,7,22,24(28)-tetraen-3beta-ol	377.321	683.3	394.324	13.3414	C28H42O	[M+H-H2O]+			C05440	Lipid metabolism; Global and overview maps	29560-24-5		BioDeepDB	2	pos	2.33724e+07	3.47013e+07	1.77762e+07	1.70164e+07	2.7866e+07	8.33424e+06	3.61957e+07	1.99714e+07	8.10081e+06	2.07162e+07	3.20422e+07	6.03796e+06	3.46194e+07	9.78596e+06	1.69725e+07	1.07902e+07	3.16827e+07	5.12227e+06	4.97905e+06	1.28951e+07	1.35611e+07	2.40984e+07	1.0615e+07	1.32355e+07
M385T555	Campestanol	385.368	554.8	402.386	29.2344	C28H50O	[M+H-H2O]+			C15787	Global and overview maps; Metabolism of terpenoids and polyketides	474-60-2		BioDeepDB	2	pos	1.12402e+07	1.19279e+07	9.14216e+06	1.04867e+07	9.36444e+06	1.04578e+07	8.72131e+06	1.0911e+07	8.58377e+06	8.19841e+06	7.99392e+06	7.68722e+06	1.03749e+07	1.12199e+07	1.46759e+07	1.10436e+07	7.66773e+06	9.26876e+06	1.28837e+07	1.36522e+07	2.27213e+07	1.8107e+07	2.42163e+07	7.57677e+06
M397T543	5alpha-Ergosta-7,22-diene-3beta,5-diol	397.347	543.3	414.35	12.4173	C28H46O2	[M+H-H2O]+			C04416				BioDeepDB	2	pos	1.55802e+06	619553	1.1162e+06	2.10347e+06	1.05979e+06	1.05644e+06	2.9889e+06	4.62709e+06	1.37246e+06	1.97893e+06	3.10199e+06	2.78918e+06	867420	923012	4.72209e+06	1.43075e+06	976514	748321	3.34724e+06	4.19867e+06	1.27378e+06	6.93458e+06	6.55573e+06	2.62298e+06
M425T581	Alpha-Tocotrienol	425.308	581.4	424.334	4.55947	C29H44O2	[M+H]+	Prenol lipids	Quinone and hydroquinone lipids	C14153	Metabolism of cofactors and vitamins; Global and overview maps	1721-51-3 / 58864-81-6	HMDB0006327	BioDeepDB	2	pos	2.00313e+07	1.31462e+07	1.42622e+07	1.56864e+07	1.97108e+07	2.04506e+07	2.55487e+07	2.01441e+07	2.13203e+07	8.6847e+06	8.73934e+06	1.20299e+07	2.20207e+07	1.9756e+07	1.30978e+07	2.0837e+07	1.97646e+07	2.10475e+07	2.54842e+07	2.55051e+07	2.17551e+07	2.18009e+07	1.51202e+07	1.66037e+07
M427T539	Taraxerol	427.356	539	426.386	2.24287	C30H50O	[M+H]+	Prenol lipids	Sesterterpenoids	C08637	Global and overview maps; Metabolism of terpenoids and polyketides	127-22-0	HMDB0034920	BioDeepDB	2	pos	4.6869e+06	6.75956e+06	2.33089e+06	3.18537e+06	3.7897e+06	9.04147e+06	5.67631e+06	350257	4.89324e+06	3.97535e+06	5.51994e+06	2.64223e+06	3.7006e+06	4.70846e+06	4.77805e+06	5.82765e+06	3.31478e+06	5.80853e+06	977556	7.55366e+06	1.74667e+06	4.58421e+06	5.45134e+06	4.74443e+06
M441T621	24-Methylenecycloartanol	441.367	620.7	440.402	14.8097	C31H52O	[M+H]+			C08830	Lipid metabolism; Global and overview maps	1449-09-8		BioDeepDB	2	pos	9.92943e+06	4.47266e+06	9.64692e+06	5.8357e+06	7.45797e+06	6.33571e+06	4.44832e+06	7.10271e+06	1.094e+07	6.13178e+06	5.73156e+06	9.29593e+06	2.70341e+06	1.82636e+06	1.62951e+06	2.01723e+06	6.30688e+06	5.38237e+06	4.33761e+06	5.06663e+06	4.62467e+06	4.58387e+06	5.91998e+06	3.34372e+06
M552T674	beta-Cryptoxanthin	552.441	673.8	552.433	15.0242	C40H56O	[M]+			C08591	Global and overview maps; Metabolism of terpenoids and polyketides	472-70-8		BioDeepDB	2	pos	8.18532e+07	3.55177e+07	3.16946e+07	1.02035e+08	4.58482e+07	4.22234e+07	5.39765e+07	1.14338e+08	4.32045e+07	8.76032e+07	2.90004e+07	4.40171e+07	1.68107e+07	3.34121e+07	2.06625e+07	1.04028e+07	7.76276e+06	2.29333e+06	1.68151e+07	6.40715e+06	7.60576e+06	1.32758e+07	7.23089e+06	1.78379e+07
M128T47	Ammelide	128.035	47	128.033	15.6209	C3H4N4O2	[M]-	Azacyclic compounds	1,3,5-triazines	C08734	Xenobiotics biodegradation and metabolism; Global and overview maps	645-93-2		MetaDNA	2	neg	5.83156e+06	29799.3	4.12907e+06	4.93835e+06	3.7401e+06	4.53152e+06	4.84646e+06	5.71653e+06	6.87259e+06	5.34358e+06	6.42461e+06	4.13028e+06	1.04781e+07	5.83102e+06	5.85595e+06	6.64783e+06	3.56911e+06	3.54519e+06	3.95356e+06	4.01707e+06	3.55045e+06	4.61678e+06	6.81746e+06	4.92152e+06
M319T440	alpha-Zearalenol	319.16	440.4	320.162	14.9645	C18H24O5	[M-H]-	Benzene and substituted derivatives	1-hydroxy-2-unsubstituted benzenoids	C14750		36455-72-8	HMDB0041824	MetaDNA	2	neg	242838	3.51669e+07	65013.3	33817.4	36681.1	31945.9	22631.7	174743	1.10789e+06	632147	883148	221703	15260.6	14607.2	17902.3	14102.4	35429	42267.5	24564.4	304851	99900	15131.6	13357.4	15329.9
M312T444	8(R)-Hydroperoxylinoleic acid	312.227	444.4	312.23	11.2097	C18H32O4	[M]-	Carboxylic acids and derivatives	Alkyl hydroperoxides	C14831	Lipid metabolism	143343-95-7	HMDB0004706	MetaDNA	2	neg	239251	213304	251829	202740	344982	433727	159383	281951	168574	201339	172741	151801	124801	155243	119380	120570	359472	738301	560545	562381	216646	216417	179321	256663
M121T270	Erythritol	121.03	270.5	122.058	13.956	C4H10O4	[M-H]-			C00503	Membrane transport	149-32-6		BioDeepDB	2	neg	4.05549e+06	4.10704e+06	1.41539e+06	3.5609e+06	1.83937e+06	1.1318e+06	1.1249e+06	4.56502e+06	2.06081e+06	1.89712e+06	1.2407e+06	935073	1.80608e+06	1.56756e+06	1.35748e+06	6.37493e+06	1.09122e+06	5.63173e+06	3.94934e+06	4.27583e+06	1.48507e+06	4.49853e+06	4.58522e+06	4.35174e+06
M133T43_2	L-Malic acid	133.015	42.8	134.022	6.58572	C4H6O5	[M-H]-	Hydroxy acids and derivatives	Beta hydroxy acids and derivatives	C00149	Cancer: overview; Chemical structure transformation maps; Signal transduction; Sensory system; Endocrine system; Excretory system; Carbohydrate metabolism; Cancer: specific types; Energy metabolism; Global and overview maps	97-67-6/6915-15-7	HMDB0000156	BioDeepDB	2	neg	1.00218e+07	2.88105e+06	1.08102e+07	6.92084e+06	1.30148e+07	1.46155e+07	1.02643e+07	1.51519e+07	1.16958e+07	8.67419e+06	9.48213e+06	1.07383e+07	1.60912e+07	2.32622e+07	2.05875e+07	1.19074e+07	8.71201e+06	2.85212e+07	2.08442e+07	5.69702e+06	1.02795e+07	2.02655e+07	1.04622e+07	2.9745e+07
M135T638	Phenyl acetate	134.895	638.1	136.052	11.896	C8H8O2	[M-H]-			C00548		122-79-2		BioDeepDB	2	neg	2.66268e+06	7.74532e+06	8.08369e+06	5.98834e+06	7.12046e+06	8.49068e+06	7.42792e+06	1.06721e+07	2.27766e+06	2.04495e+06	5.54399e+06	2.30948e+06	9.19133e+06	2.27128e+06	2.35033e+06	5.93253e+06	7.41084e+06	6.05494e+06	7.06769e+06	9.31675e+06	8.17481e+06	2.31017e+06	6.4493e+06	9.32366e+06
M137T54	Urocanic acid	137.036	53.6	138.043	3.64867	C6H6N2O2	[M-H]-	Azoles	Imidazoles	C00785	Amino acid metabolism; Global and overview maps	104-98-3	HMDB0000301	BioDeepDB	2	neg	642419	674097	1.12992e+06	1.924e+06	1.40648e+06	415191	581351	1.20181e+06	828094	1.52226e+06	871221	951984	1.07123e+06	987764	668106	1.05059e+06	1.49487e+06	892051	986227	1.62302e+06	749131	1.03941e+06	456768	1.00742e+06
M144T320	Spermidine	143.915	319.7	145.158	0.650292	C7H19N3	[M-H]-	Organonitrogen compounds	Amines	C00315	Membrane transport; Metabolism of other amino acids; Digestive system; Biosynthesis of other secondary metabolites; Metabolism of terpenoids and polyketides; Amino acid metabolism; Global and overview maps	124-20-9	HMDB0001257	BioDeepDB	2	neg	1.38956e+06	2.47351e+06	1.05695e+06	2.45433e+06	1.45756e+06	2.97313e+06	1.51695e+06	2.86586e+06	2.69654e+06	2.87494e+06	2.24071e+06	1.91742e+06	1.4377e+06	1.61584e+07	1.21326e+06	1.75945e+06	1.18845e+06	2.55794e+06	2.27589e+06	1.25038e+06	6.83346e+06	1.04852e+07	1.46249e+06	1.14405e+07
M147T49	Nornicotine	146.966	49	148.1	6.66791	C9H12N2	[M-H]-	Pyridines and derivatives	Pyrrolidinylpyridines	C06524	Biosynthesis of other secondary metabolites	494-97-3	HMDB0001126	BioDeepDB	2	neg	1.14421e+07	8.68891e+06	1.13689e+07	1.08975e+07	1.26885e+07	9.13603e+06	8.3844e+06	6.84958e+06	6.25351e+07	5.07846e+07	6.99904e+07	1.0316e+08	2.68998e+07	1.78598e+07	4.63451e+07	1.71439e+07	1.52754e+07	1.07529e+07	7.50674e+06	9.41713e+06	8.14915e+06	9.81145e+06	7.18809e+06	7.21209e+06
M165T675	Phthalic acid	165.042	674.8	166.027	8.38073	C8H6O4	[M-H]-	Benzene and substituted derivatives	Benzoic acids and derivatives	C01606	Membrane transport; Xenobiotics biodegradation and metabolism; Global and overview maps	88-99-3 / 3198-29-6	HMDB0002107	BioDeepDB	2	neg	1.56956e+07	6.45365e+06	1.05563e+07	7.64996e+06	1.34006e+07	6.03441e+06	1.8081e+07	8.88448e+06	1.95569e+07	1.40237e+07	2.32345e+07	1.27277e+07	1.94168e+07	1.57678e+07	2.56166e+07	1.60957e+07	1.48766e+07	1.33115e+07	1.86849e+07	1.8555e+07	2.31352e+07	1.37041e+07	1.35325e+07	9.05042e+06
M151T334	3,4-Dihydroxyphenylglycol	151.041	333.8	170.058	11.8511	C8H10O4	[M-H2O-H]-	Phenols	Benzenediols	C05576	Amino acid metabolism; Global and overview maps	28822-73-3 / 3343-19-9	HMDB0000318	BioDeepDB	2	neg	885438	790771	811598	1.0918e+06	685297	776990	672243	889037	740200	726408	892190	794743	568210	727865	676551	758239	844415	872450	741364	763363	748384	767088	700585	832661
M153T46_2	Protocatechuic acid	153.017	45.6	154.027	9.78206	C7H6O4	[M-H]-	Benzene and substituted derivatives	Benzoic acids and derivatives	C00230	Chemical structure transformation maps; Xenobiotics biodegradation and metabolism; Global and overview maps; Metabolism of terpenoids and polyketides	99-50-3	HMDB0001856	BioDeepDB	2	neg	283255	350459	315851	304067	483920	524237	495078	548475	285106	284681	248790	260604	463976	427337	534539	477831	296745	468448	415449	321002	341698	367548	330988	383603
M172T43	4-Quinolinecarboxylic acid	171.912	42.6	173.048	18.3484	C10H7NO2	[M-H]-			C06414		486-74-8		BioDeepDB	2	neg	225983	712210	1.03181e+06	699379	593010	715890	682666	663673	719930	1.09739e+06	1.17376e+06	704532	554520	693047	169538	518837	779596	683479	978981	581479	535312	717233	648879	656716
M179T649	Caffeate	178.966	649	180.042	11.473	C9H8O4	[M-H]-			C01197	Chemical structure transformation maps; Biosynthesis of other secondary metabolites; Global and overview maps	501-16-6 / 331-39-5		BioDeepDB	2	neg	1.11254e+07	1.02064e+07	8.49798e+06	3.00756e+07	1.50142e+07	9.22053e+06	1.51484e+06	2.25905e+07	2.36489e+06	2.45944e+07	1.30949e+06	2.64695e+07	9.64523e+06	3.67161e+07	4.38625e+07	1.03565e+07	9.1561e+06	1.39951e+06	2.283e+07	2.46791e+07	3.52952e+07	1.96665e+07	3.24258e+07	1.00951e+07
M175T186	Guanidinosuccinic acid	174.954	185.6	175.059	3.36207	C5H9N3O4	[M]-	Carboxylic acids and derivatives	Amino acids, peptides, and analogues	C03139		6133-30-8	HMDB0003157	BioDeepDB	2	neg	963193	203303	110978	204012	228838	830325	175072	156589	739475	179093	1.06299e+06	1.00064e+06	611206	161818	130187	987739	644009	199442	808087	594382	579247	138112	108618	136201
M179T49	D-Fructose	179.056	49	180.063	2.0999	C6H12O6	[M-H]-			C00095	Endocrine and metabolic disease; Membrane transport; Sensory system; Digestive system; Carbohydrate metabolism; Global and overview maps	57-48-7		BioDeepDB	2	neg	1.68717e+07	3.01098e+06	1.74507e+07	1.67159e+07	3.72412e+06	1.57091e+07	4.38016e+06	3.97382e+06	1.38374e+07	4.37133e+06	1.84267e+07	3.93626e+06	1.28843e+07	3.8611e+06	2.6413e+07	4.4973e+06	4.40449e+06	5.93295e+06	1.43994e+07	1.06935e+07	1.15571e+07	3.92753e+06	4.15269e+06	1.58179e+07
M205T403	3-Oxalomalate	205.014	403.3	206.006	6.67755	C6H6O8	[M-H]-			C01990	Carbohydrate metabolism	3687-15-8 / 89304-26-7		BioDeepDB	2	neg	3.61812e+06	1.59025e+06	1.67427e+06	967138	2.28446e+06	1.94937e+06	2.79752e+06	1.69242e+06	1.73874e+06	4.54763e+06	1.43059e+06	1.32185e+06	2.48328e+06	2.06234e+06	2.39462e+06	2.27943e+06	2.9533e+06	552082	1.49501e+06	3.41509e+06	1.12924e+06	1.13341e+06	1.65449e+06	2.01698e+06
M187T73_2	Azelaic acid	187.099	72.5	188.105	6.81992	C9H16O4	[M-H]-	Fatty Acyls	Fatty acids and conjugates	C08261		123-99-9	HMDB0000784	BioDeepDB	2	neg	1.23995e+06	2.4135e+06	1.13965e+06	1.15369e+06	3.505e+06	2.77078e+06	1.61566e+06	1.31857e+06	1.22952e+06	1.77244e+06	2.89817e+06	3.48238e+06	2.25482e+06	1.61762e+06	2.48714e+06	3.06556e+06	2.97982e+06	2.49837e+06	1.85438e+06	2.72379e+06	2.41255e+06	1.77014e+06	1.59664e+06	2.61622e+06
M223T640	Thymidine	223.029	640	242.09	4.51788	C10H14N2O5	[M-H2O-H]-	Pyrimidine nucleosides	Pyrimidine 2'-deoxyribonucleosides	C00214	Global and overview maps; Nucleotide metabolism	50-89-5	HMDB0000273	BioDeepDB	2	neg	1.16007e+07	4.38364e+07	3.43475e+07	3.94084e+07	3.68841e+07	1.04297e+07	3.30211e+07	1.16927e+07	3.8143e+07	5.65537e+07	1.13299e+07	1.1965e+07	1.14851e+07	1.14077e+07	1.08294e+07	4.63597e+07	9.77787e+06	6.95806e+07	4.56997e+06	9.40845e+07	5.5247e+07	5.51892e+07	3.46591e+07	1.19442e+07
M227T591	Myristic acid	227.202	590.6	228.209	3.85559	C14H28O2	[M-H]-	Fatty Acyls	Fatty acids and conjugates	C06424	Lipid metabolism; Global and overview maps	544-63-8	HMDB0000806	BioDeepDB	2	neg	6.88458e+07	6.78176e+07	1.77559e+07	6.14718e+07	6.6356e+07	7.15303e+07	6.89308e+07	6.49304e+07	6.14183e+07	6.95588e+07	6.625e+07	6.68384e+07	5.6804e+07	6.45356e+07	6.35122e+07	5.8891e+07	5.40711e+07	5.4494e+07	7.32479e+07	6.70089e+07	5.64121e+07	5.65155e+07	5.94967e+07	6.62582e+07
M243T56	Cytidine	242.944	56.5	243.085	3.96935	C9H13N3O5	[M]-			C00475	Membrane transport; Global and overview maps; Nucleotide metabolism	65-46-3		BioDeepDB	2	neg	1.51457e+06	1.44332e+06	1.20519e+06	1.17832e+06	1.39219e+06	1.56991e+06	1.42456e+06	1.21898e+06	1.08939e+06	1.46357e+06	1.41795e+06	1.41617e+06	1.12793e+06	1.28127e+06	1.50175e+06	1.46642e+06	987966	1.38131e+06	1.43367e+06	1.57015e+06	1.15144e+06	888920	1.38219e+06	1.45039e+06
M243T54_1	Uridine	243.063	53.8	244.07	4.83824	C9H12N2O6	[M-H]-	Pyrimidine nucleosides		C00299	Membrane transport; Global and overview maps; Nucleotide metabolism	58-96-8	HMDB0000296	BioDeepDB	2	neg	477863	449907	754712	500696	484976	594672	575730	450262	422780	559493	454081	403540	440423	467704	527907	606595	825742	553127	720823	465499	366946	529847	440021	500356
M283T597	Guanosine	283.272	597.2	283.092	28.6909	C10H13N5O5	[M]-	Purine nucleosides		C00387	Membrane transport; Global and overview maps; Nucleotide metabolism	118-00-3	HMDB0000133	BioDeepDB	2	neg	2.01605e+07	8.91067e+06	1.00312e+07	8.15061e+06	1.79778e+07	1.56926e+07	1.14311e+07	1.32475e+07	1.3809e+07	1.2252e+07	1.881e+07	1.15498e+07	1.57202e+07	1.58704e+07	1.86777e+07	3.35695e+07	1.08555e+07	8.06763e+06	5.8534e+06	3.30857e+06	1.12972e+07	1.38873e+07	1.4452e+07	7.1131e+06
M266T73	Deoxyguanosine	266.089	72.7	267.097	0.466009	C10H13N5O4	[M-H]-	Purine nucleosides	Purine 2'-deoxyribonucleosides	C00330	Membrane transport; Global and overview maps; Nucleotide metabolism	961-07-9	HMDB0000085	BioDeepDB	2	neg	150276	137274	120524	171975	171312	147365	194638	417035	126934	159303	182268	231167	148813	130075	100521	171800	377954	176911	106328	173473	114612	125223	168475	268330
M267T401	Formononetin	267.066	400.9	268.074	0.0562949	C16H12O4	[M-H]-	Isoflavonoids	O-methylated isoflavonoids	C00858	Chemical structure transformation maps; Biosynthesis of other secondary metabolites; Global and overview maps	485-72-3	HMDB0005808	BioDeepDB	2	neg	1.28134e+06	984796	1.0631e+06	827489	845438	720944	2.30396e+06	397850	124966	97381.5	69619.8	198325	85285.5	11878.1	19631.7	23291.3	12477.6	203289	52522.3	129819	24579.8	12739.5	9798.34	10360.5
M269T468	Genistein	269.046	468	270.053	2.51258	C15H10O5	[M-H]-	Isoflavonoids	Isoflav-2-enes	C06563	Chemical structure transformation maps; Biosynthesis of other secondary metabolites; Global and overview maps	446-72-0	HMDB0003217	BioDeepDB	2	neg	1.0007e+06	1.0482e+06	892204	946902	592957	597273	653069	537823	784626	862073	780537	842252	531057	548805	424846	506825	1.18128e+06	1.34204e+06	1.23e+06	1.09468e+06	769046	926943	968706	820682
M269T543	Dehydroepiandrosterone	269.209	542.9	288.209	10.0521	C19H28O2	[M-H2O-H]-	Steroids and steroid derivatives	Androstane steroids	C01227	Cancer: overview; Endocrine system; Lipid metabolism; Xenobiotics biodegradation and metabolism; Cancer: specific types; Global and overview maps	53-43-0	HMDB0000077	BioDeepDB	2	neg	8989.74	267759	430748	169208	22508.1	30775.5	1.71123e+06	36892.4	9813.13	19604.1	19196.6	15540.2	11897.7	11669.4	13744.1	13985.4	2.13696e+07	2.12676e+07	3.07562e+07	1.32574e+07	1.16826e+06	238617	183239	226096
M271T524	Epiandrosterone	271.229	524.1	290.225	4.53161	C19H30O2	[M-H2O-H]-	Steroids and steroid derivatives	Androstane steroids	C07635	Xenobiotics biodegradation and metabolism; Global and overview maps	481-29-8	HMDB0000365	BioDeepDB	2	neg	4.4252e+06	3.84239e+06	4.16582e+06	4.7095e+06	850667	2.44505e+06	2.62693e+06	2.37272e+06	655249	2.20924e+06	2.30176e+06	1.63949e+06	1.89081e+06	1.57063e+06	1.68917e+06	3.45741e+06	8.0538e+06	1.22293e+07	5.73348e+06	3.83413e+06	3.05397e+06	2.82751e+06	3.02292e+06	2.92027e+06
M277T583	Alpha-Linolenic acid	277.217	583	278.225	1.16876	C18H30O2	[M-H]-	Fatty Acyls	Lineolic acids and derivatives	C06427	Lipid metabolism; Chemical structure transformation maps; Global and overview maps	463-40-1	HMDB0001388	BioDeepDB	2	neg	1.01108e+08	5.6933e+07	4.29249e+07	6.4887e+07	1.01625e+08	6.62394e+07	1.46843e+08	6.21064e+07	1.31307e+08	1.24866e+08	9.30692e+07	9.17542e+07	6.57113e+07	5.4173e+07	7.72976e+07	5.85332e+07	2.47257e+08	2.66166e+08	2.08055e+08	1.91759e+08	1.19465e+08	9.87673e+07	1.14794e+08	2.16472e+08
M299T576	Kaempferide	299.26	576.3	300.063	2.27368	C16H12O6	[M-H]-	Flavonoids	O-methylated flavonoids	C10098	Biosynthesis of other secondary metabolites	491-54-3	HMDB0037441	BioDeepDB	2	neg	3.29851e+07	1.98397e+06	1.72376e+06	3.26988e+07	1.29464e+07	9.10814e+06	5.73707e+07	3.66382e+07	2.50689e+07	2.39301e+07	3.98921e+07	1.3486e+07	1.51485e+07	1.18897e+07	3.83585e+07	7.6138e+07	6.35178e+06	8.38206e+06	9.65272e+06	5.75299e+06	3.14312e+07	2.62725e+07	5.30286e+07	2.6841e+07
M297T591	Nonadecanoic acid	297.281	590.5	298.287	2.61033	C19H38O2	[M-H]-	Fatty Acyls	Fatty acids and conjugates	C16535		646-30-0	HMDB0000772	BioDeepDB	2	neg	1.50301e+06	3.36386e+06	1.46373e+06	736920	2.20031e+07	2.12942e+07	3.19933e+07	2.03061e+07	2.13851e+06	1.10467e+07	1.28311e+07	267099	7.52617e+06	1.09574e+07	1.07325e+07	1.04637e+07	2.03009e+07	2.65471e+07	3.31819e+07	2.67817e+07	1.52484e+07	1.49925e+07	1.72655e+07	1.39152e+07
M299T559	all-trans-Retinoic acid	299.203	558.9	300.209	3.262	C20H28O2	[M-H]-	Prenol lipids	Retinoids	C00777	Cancer: overview; Metabolism of cofactors and vitamins; Cancer: specific types; Immune system; Global and overview maps	302-79-4	HMDB0001852	BioDeepDB	2	neg	3.14088e+07	1.5784e+07	1.8992e+07	2.48739e+07	9.79406e+06	8.16779e+06	1.3617e+07	1.90052e+06	6.29754e+06	1.37751e+07	1.02914e+07	1.19232e+06	537982	340104	376999	196193	9.47556e+07	1.03976e+08	7.49053e+07	6.22251e+07	1.10255e+07	1.23235e+07	1.36607e+07	1.06775e+07
M327T594_1	Docosahexaenoic acid	327.234	593.5	328.24	3.6671	C22H32O2	[M-H]-	Fatty Acyls	Fatty acids and conjugates	C06429	Lipid metabolism	6217-54-5	HMDB0002183	BioDeepDB	2	neg	7.20242e+06	3.9754e+06	5.43157e+06	864442	4.87858e+06	1.16709e+06	7.00747e+06	897991	5.92407e+06	9.7864e+06	5.15882e+06	3.44337e+06	5.36249e+06	4.31363e+06	3.53272e+06	3.28568e+06	5.81834e+06	1.05635e+07	6.83298e+06	6.79655e+06	1.33289e+07	4.86092e+06	3.3215e+06	4.58128e+06
M339T484	Fructose 1,6-bisphosphate	339.2	483.6	339.996	0.70867	C6H14O12P2	[M-H]-	Organooxygen compounds	Carbohydrates and carbohydrate conjugates	C00354	Cancer: overview; Signal transduction; Endocrine system; Amino acid metabolism; Energy metabolism; Global and overview maps	488-69-7	HMDB0001058	BioDeepDB	2	neg	4.96778e+06	8.61017e+06	1.05942e+07	9.05395e+06	8.6786e+06	8.77796e+06	9.54166e+06	7.47259e+06	111978	225565	798473	2.88219e+06	749149	653966	2.89243e+06	327234	8.03078e+06	7.52528e+06	8.61509e+06	7.71552e+06	5.72509e+06	4.59066e+06	5.82347e+06	7.09626e+06
M341T668	Rosmarinic acid	341.308	668.3	360.084	5.45337	C18H16O8	[M-H2O-H]-	Cinnamic acids and derivatives	Hydroxycinnamic acids and derivatives	C01850	Amino acid metabolism; Global and overview maps	537-15-5 / 20283-92-5 537-15-5 / 20283-92-5	HMDB0003572	BioDeepDB	2	neg	1.28075e+07	6.72254e+06	7.14392e+06	9.05501e+06	8.49373e+06	5.65258e+06	1.39618e+07	1.08897e+07	1.2356e+07	8.08486e+06	1.26386e+07	1.31272e+07	1.05564e+07	1.1816e+07	1.2599e+07	1.56759e+07	1.0985e+07	1.02516e+07	1.10528e+07	9.9266e+06	1.45042e+07	1.36171e+07	1.20204e+07	9.43234e+06
M371T537	Deoxycorticosterone acetate	371.067	537.2	372.23	1.48636	C23H32O4	[M-H]-			C14554		56-47-3		BioDeepDB	2	neg	6.61538e+06	5.09114e+06	2.30209e+06	5.7579e+06	5.66083e+06	6.49391e+06	1.10776e+06	6.27412e+06	3.63833e+06	9.26909e+06	612453	804114	532271	343064	2.77676e+07	438657	2.21225e+07	846622	200419	348155	508055	394282	502201	168062
M391T622_1	Deoxycholic acid	391.263	621.8	392.293	27.5552	C24H40O4	[M-H]-	Steroids and steroid derivatives	Bile acids, alcohols and derivatives	C04483	Lipid metabolism; Digestive system	83-44-3	HMDB0000626	BioDeepDB	2	neg	5.61629e+07	3.39913e+07	4.4212e+07	3.99748e+07	3.14833e+07	2.54998e+07	5.10246e+07	3.53368e+07	3.83295e+07	2.19635e+07	2.7183e+07	2.40109e+07	1.99783e+07	2.78517e+07	4.75645e+07	5.32822e+07	4.94836e+07	6.43807e+07	6.70294e+07	2.23596e+07	3.31319e+07	3.15168e+07	2.64014e+07	2.73582e+07
M401T302	25-Hydroxycholesterol	401.089	301.6	402.35	4.14241	C27H46O2	[M-H]-	Steroids and steroid derivatives	Cholestane steroids	C15519	Lipid metabolism	2140-46-7	HMDB0006247	BioDeepDB	2	neg	122.27	207.33	187.36	25095.8	17863.6	30463.8	118.852	26970.5	96.9335	27948.8	185.336	342.609	124.702	445.324	92.2728	109.217	119660	1.14161e+06	10145.6	44768.1	24768.5	26228.9	24605.2	96925
M449T579	Glycochenodeoxycholic acid	449.31	579.4	449.314	0.223079	C26H43NO5	[M]-			C05466	Lipid metabolism; Digestive system	16564-43-5		BioDeepDB	2	neg	7.29308e+07	2.16633e+07	2.36039e+07	2.17277e+07	5.94917e+07	6.89467e+06	3.23611e+07	7.44235e+07	1.14606e+08	7.08659e+07	9.00136e+07	7.17734e+07	8.46017e+07	6.32383e+07	8.34279e+07	4.99647e+07	8.67597e+07	1.92026e+07	6.47865e+07	6.56887e+07	7.89531e+07	5.99207e+07	8.15638e+07	1.83534e+07
M471T511	Maslinic acid	471.353	510.8	472.355	7.71886	C30H48O4	[M-H]-	Prenol lipids	Triterpenoids	C16939		4373-41-5	HMDB0002392	BioDeepDB	2	neg	4.13065e+06	3.02168e+06	9.37501e+07	2.50797e+06	4.59147e+06	3.5473e+06	1.46589e+07	2.26494e+06	3.70468e+06	2.50102e+06	8.8388e+06	3.331e+06	5.93547e+06	1.16535e+06	3.86355e+06	2.19998e+06	3.1061e+08	1.18442e+08	1.05356e+08	8.8852e+07	4.29606e+07	8.17453e+06	1.01441e+08	2.8285e+07
M117T43	Succinic acid	117.02	42.9	118.027	5.77679	C4H6O4	[M-H]-	Carboxylic acids and derivatives	Dicarboxylic acids and derivatives	C00042	Cancer: overview; Metabolism of cofactors and vitamins; Chemical structure transformation maps; Signal transduction; Nervous system; Endocrine system; Carbohydrate metabolism; Xenobiotics biodegradation and metabolism; Amino acid metabolism; Energy metabolism; Global and overview maps	110-15-6	HMDB0000254	BioDeepDB	2	neg	2.04197e+06	1.40933e+06	2.46172e+06	2.08814e+06	2.55391e+06	1.44766e+06	3.15143e+06	3.75253e+06	2.39426e+06	2.63921e+06	2.04401e+06	3.23305e+06	3.56437e+06	2.93051e+06	2.64857e+06	1.56205e+06	1.58916e+06	1.67685e+06	1.25697e+06	2.02882e+06	2.23022e+06	4.74536e+06	3.09329e+06	2.49505e+06
M128T611	Cyanuric acid	128.011	611.3	129.017	3.90592	C3H3N3O3	[M-H]-	Triazines	1,3,5-triazines	C06554	Xenobiotics biodegradation and metabolism; Global and overview maps	108-80-5/504-19-8	HMDB0041861	BioDeepDB	2	neg	5.73759e+06	1.3085e+07	1.87641e+07	2.72881e+07	2.25375e+07	2.91793e+07	3.10547e+07	3.05972e+07	1.81618e+07	1.30081e+07	1.83434e+07	1.37135e+07	1.64865e+07	1.58754e+07	1.73465e+07	2.09585e+07	1.30327e+07	1.53561e+07	2.06281e+07	1.31617e+07	1.40663e+07	2.83866e+07	1.32962e+07	2.05427e+07
M130T84	Fluorouracil	130.018	83.9	130.018	2.30737	C4H3FN2O2	[M]-	Diazines	Pyrimidines and pyrimidine derivatives	C07649	Xenobiotics biodegradation and metabolism; Digestive system	51-21-8	HMDB0014684	BioDeepDB	2	neg	1.91176e+06	1.75382e+06	1.71206e+06	6.28121e+06	6.11816e+06	6.2697e+06	7.59346e+06	6.39581e+06	6.4745e+06	5.71296e+06	4.58392e+06	8.22329e+06	2.97714e+06	9.34771e+06	1.0616e+07	9.97469e+06	9.05662e+06	2.12664e+06	1.05672e+07	7.23626e+06	8.57314e+06	8.51831e+06	8.84256e+06	8.44037e+06
M138T336	4-Nitrophenol	138.02	336	139.027	5.79624	C6H5NO3	[M-H]-	Phenols	Nitrophenols	C00870	Xenobiotics biodegradation and metabolism; Global and overview maps	100-02-7	HMDB0001232	BioDeepDB	2	neg	7.58616e+06	7.67416e+06	7.95253e+06	7.69149e+06	6.05199e+06	5.57206e+06	4.66066e+06	7.22565e+06	4.93582e+06	5.12135e+06	5.58191e+06	5.06591e+06	3.84342e+06	5.27348e+06	5.419e+06	4.76238e+06	3.65752e+06	9.3102e+06	9.88301e+06	6.82336e+06	7.97148e+06	8.86991e+06	8.18485e+06	9.14258e+06
M145T320	Adipic acid	145.05	320.4	146.058	4.82593	C6H10O4	[M-H]-	Fatty Acyls	Fatty acids and conjugates	C06104	Xenobiotics biodegradation and metabolism; Global and overview maps	124-04-9	HMDB0000448	BioDeepDB	2	neg	435190	213438	303729	895037	409052	140559	575232	802269	362131	284121	444449	429952	586675	879794	490174	548325	759778	533605	551676	744125	625771	523901	358021	712293
M152T382	Aminosalicylic Acid	152.036	382.1	153.043	5.10405	C7H7NO3	[M-H]-	Benzene and substituted derivatives	Benzoic acids and derivatives	C02518		65-49-6	HMDB0014378	BioDeepDB	2	neg	3.6321e+06	2.24804e+06	2.25393e+06	2.2774e+06	2.39332e+06	2.80213e+06	2.34386e+06	2.75405e+06	3.17168e+06	2.24037e+06	2.63875e+06	4.22624e+06	3.21602e+06	2.0633e+06	2.23167e+06	2.85512e+06	2.15531e+06	2.24475e+06	2.06371e+06	2.07336e+06	2.37762e+06	3.03064e+06	3.0556e+06	2.89898e+06
M175T433	D-Glucuronic acid	175.021	433	194.043	21.1975	C6H10O7	[M-H2O-H]-	Organooxygen compounds	Carbohydrates and carbohydrate conjugates	C00191	Carbohydrate metabolism; Global and overview maps	6556-12-3/528-16-5	HMDB0000127	BioDeepDB	2	neg	369600	328586	784911	543275	1.109e+06	1.2925e+06	741073	341949	274660	374954	547658	732677	769613	373809	789384	551656	350127	399721	242590	369052	719282	333631	618195	444331
M179T338	3-(4-Hydroxyphenyl)pyruvate	179.036	338.4	180.042	6.5685	C9H8O4	[M-H]-	Benzene and substituted derivatives	Phenylpyruvic acid derivatives	C01179	Metabolism of cofactors and vitamins; Biosynthesis of other secondary metabolites; Metabolism of terpenoids and polyketides; Amino acid metabolism; Chemical structure transformation maps; Global and overview maps	156-39-8	HMDB0000707	mzCloud	2	neg	2.56337e+06	326515	1.49648e+06	1.17519e+06	1.7123e+06	1.42873e+06	1.45022e+06	1.57034e+06	1.17914e+06	945696	816252	3.41225e+06	1.64503e+06	1.23439e+06	1.32551e+06	717987	1.61163e+06	1.64646e+06	1.59656e+06	1.1815e+06	906746	1.66209e+06	1.64741e+06	595409
M183T257	2,4-Dinitrophenol	183.006	256.6	184.012	4.78674	C6H4N2O5	[M-H]-	Textile Chemicals/Auxiliary/Dyes; Pesticides/Herbicides; Industrial Chemicals; Endogenous Metabolites		C02496		51-28-5		mzCloud	2	neg	2.45431e+06	557932	543009	2.44647e+06	562393	1.30843e+06	2.53934e+06	3.0745e+06	2.49932e+06	2.37167e+06	2.4583e+06	2.81257e+06	2.8021e+06	2.88585e+06	683951	2.82337e+06	2.73401e+06	737356	2.54914e+06	652258	626522	636935	2.44948e+06	754965
M271T494	16-Hydroxy hexadecanoic acid	271.229	494.4	272.235	3.31823	C16H32O3	[M-H]-	Fatty Acyls	Fatty acids and conjugates	C18218	Lipid metabolism; Global and overview maps	506-13-8	HMDB0006294	BioDeepDB	2	neg	1.27768e+07	1.20583e+07	1.13957e+07	8.51563e+06	1.14953e+07	3.33068e+06	1.28983e+07	1.06682e+07	5.81557e+06	1.22956e+07	7.26569e+06	1.34124e+07	9.58004e+06	7.37573e+06	9.19038e+06	7.10592e+06	1.05201e+07	1.0052e+07	1.20645e+07	1.16959e+07	9.71313e+06	1.15523e+07	9.89795e+06	8.25436e+06
M267T309	Inosine	267.066	308.6	268.081	26.5851	C10H12N4O5	[M-H]-	Purine nucleosides		C00294	Membrane transport; Global and overview maps; Nucleotide metabolism	58-63-9	HMDB0000195	BioDeepDB	2	neg	341649	1.04319e+06	985752	2.04646e+06	839443	1.25714e+06	1.57096e+06	812560	1.17658e+06	903526	1.03341e+06	1.0388e+06	1.09146e+06	935741	745179	856052	802852	2.02306e+06	1.72532e+06	1.03031e+06	773272	793514	792884	893458
M271T368	Naringenin	271.063	368.3	272.068	5.07632	C15H12O5	[M-H]-	Flavonoids	Flavans	C00509	Chemical structure transformation maps; Biosynthesis of other secondary metabolites; Global and overview maps	480-41-1	HMDB0002670	BioDeepDB	2	neg	904628	844509	980732	1.20157e+06	1.31365e+06	930017	1.01075e+06	1.06699e+06	310685	295900	303889	210838	300927	270338	306138	265493	767240	746155	616167	629334	42404.6	38421.5	49952.8	55148.4
M295T473	9,10-Epoxyoctadecenoic acid	295.23	473.1	296.235	6.77438	C18H32O3	[M-H]-	Fatty Acyls	Fatty acids and conjugates	C14825	Lipid metabolism; Global and overview maps		HMDB0004701	BioDeepDB	2	neg	1.0111e+07	6.21472e+06	8.60452e+06	9.28615e+06	6.8765e+06	8.34101e+06	1.73306e+07	1.10375e+07	1.87962e+06	7.90609e+06	2.29458e+06	1.59263e+06	2.73182e+06	4.49578e+06	5.76672e+06	3.79663e+06	1.75348e+07	1.49633e+07	1.39563e+07	1.44506e+07	2.72014e+06	2.04313e+06	1.18815e+07	2.81036e+06
M279T494	Bovinic acid	279.228	493.6	280.24	16.9181	C18H32O2	[M-H]-	Fatty Acyls	Lineolic acids and derivatives	C04056	Lipid metabolism	2540-56-9	HMDB0003797	BioDeepDB	2	neg	1.41468e+07	9.25684e+06	7.04082e+06	1.43531e+07	1.10691e+07	1.25707e+07	1.77452e+07	1.57049e+07	7.27291e+06	1.46468e+07	5.4437e+06	1.02525e+07	1.397e+07	9.74086e+06	1.62687e+07	1.72262e+07	2.37943e+07	1.56496e+07	2.02084e+07	1.36652e+07	1.7907e+07	1.62252e+07	3.81973e+06	1.95471e+07
M283T504	Rhein	283.018	503.7	284.032	24.0267	C15H8O6	[M-H]-	Anthracenes	Anthracenecarboxylic acids and derivatives	C10401		478-43-3	HMDB0032876	BioDeepDB	2	neg	1633.08	1384.39	6.02553e+06	1523.24	1.56311e+06	2205.41	4588.93	1232.37	2.44106e+06	7.67722e+06	5.16468e+06	3.22916e+06	1.10496e+07	3.80429e+06	5.38895e+06	3.472e+06	1845.42	2202.9	570.492	3418.77	1274	2692.07	786.964	1775.74
M293T512	9-OxoODE	293.216	512.4	294.219	11.1727	C18H30O3	[M-H]-	Fatty Acyls	Lineolic acids and derivatives	C14766	Lipid metabolism	54232-59-6	HMDB0004669	BioDeepDB	2	neg	3.19173e+07	1.6132e+07	3.65689e+07	1.82337e+07	2.86454e+07	2.24029e+07	5.58351e+07	2.45083e+07	4.0961e+07	8.66559e+06	2.5576e+07	1.47141e+07	2.14039e+07	6.39264e+06	2.22134e+07	6.2355e+06	1.69713e+07	5.16879e+07	4.63743e+07	4.21203e+07	2.24066e+07	7.84934e+06	3.06473e+07	1.07027e+07
M293T507	13-L-Hydroperoxylinoleic acid	293.215	506.9	312.23	12.2436	C18H32O4	[M-H2O-H]-	Fatty Acyls	Lineolic acids and derivatives	C04717	Lipid metabolism; Global and overview maps	33964-75-9	HMDB0003871	BioDeepDB	2	neg	458027	3.34701e+06	873943	349452	596774	314099	477710	746766	313999	1.8522e+06	269443	334616	435132	1.13146e+06	412370	293707	1.91712e+06	5.51628e+06	1.21681e+06	1.21456e+06	615668	540649	785747	3.61402e+06
M315T521	15-Deoxy-d-12,14-PGJ2	315.197	521.3	316.204	0.634524	C20H28O3	[M-H]-	Fatty Acyls	Eicosanoids	C14717	Lipid metabolism	87893-55-8	HMDB0005079	BioDeepDB	2	neg	879487	798178	849166	929266	590252	692046	1.00288e+06	871806	1.16499e+06	1.45852e+06	1.13603e+06	1.36083e+06	1.14137e+06	1.02525e+06	905627	1.02276e+06	1.46597e+06	1.9962e+06	731354	2.07781e+06	1.86615e+06	1.37343e+06	1.3733e+06	34410.8
M303T481	6beta-Hydroxytestosterone	303.201	481.2	304.204	13.5224	C19H28O3	[M-H]-	Steroids and steroid derivatives	Androstane steroids	C14497		62-99-7	HMDB0006259	BioDeepDB	2	neg	3.76115e+06	4.29661e+06	1.36392e+06	1.10471e+06	3.22993e+06	968051	4.41321e+06	2.32541e+06	9.14852e+06	4.84251e+06	5.99536e+06	2.34702e+06	2.65984e+06	2.51702e+06	1.75185e+06	3.40014e+06	3.65242e+06	801927	1.15358e+06	1.50209e+06	1.65293e+06	1.84363e+06	1.4145e+06	685116
M303T604	Arachidonic acid	303.233	604.4	304.24	0.989337	C20H32O2	[M-H]-	Fatty Acyls	Fatty acids and conjugates	C00219	Circulatory system; Cell growth and death; Nervous system; Sensory system; Endocrine system; Lipid metabolism; Structure-based classification; Immune system; Infectious disease: parasitic; Global and overview maps	506-32-1	HMDB0001043	BioDeepDB	2	neg	4.45859e+07	2.32481e+07	2.14435e+07	9.9337e+06	1.84075e+07	1.76786e+07	5.63371e+07	1.66836e+07	4.99501e+07	5.85102e+07	3.70659e+07	4.38446e+07	1.35139e+07	5.12612e+07	4.45624e+07	3.68795e+07	1.22372e+07	2.41568e+07	1.36218e+07	1.07015e+07	3.84448e+07	7.21329e+07	2.53975e+07	9.12375e+06
M319T531	20-HETE	319.229	531.4	320.235	2.50604	C20H32O3	[M-H]-	Fatty Acyls	Fatty acids and conjugates	C14748	Lipid metabolism; Global and overview maps; Circulatory system	79551-86-3	HMDB0005998	BioDeepDB	2	neg	2.49521e+07	2.64626e+07	1.64461e+07	1.95814e+07	1.82356e+07	1.53119e+07	1.87181e+07	1.82078e+07	2.09102e+07	1.4619e+07	2.08933e+07	1.37668e+07	1.39511e+07	1.43552e+07	1.57569e+07	1.61517e+07	1.26056e+07	1.99316e+07	2.09177e+07	2.03058e+07	1.59619e+07	1.6037e+07	1.38376e+07	1.77066e+07
M319T487	16(R)-HETE	319.229	486.9	320.235	2.81929	C20H32O3	[M-H]-	Fatty Acyls	Eicosanoids	C14778	Lipid metabolism	183509-22-0	HMDB0004680	BioDeepDB	2	neg	1.49019e+06	791574	2.62914e+06	1.10937e+06	1.34014e+06	906989	1.13556e+06	815380	960097	1.63159e+06	924812	794578	805573	829109	1.28562e+06	815605	3.84262e+06	539829	1.63126e+06	2.08881e+06	1.0167e+06	997802	1.34849e+06	1.39925e+06
M325T464	11-Dehydrocorticosterone	325.185	463.8	344.199	14.115	C21H28O4	[M-H2O-H]-	Steroids and steroid derivatives	Hydroxysteroids	C05490	Lipid metabolism	72-23-1	HMDB0004029	BioDeepDB	2	neg	4.62035e+06	6.65415e+06	5.87714e+06	4.0568e+06	5.14693e+06	5.16061e+06	7.56576e+06	8.2247e+06	1.37954e+06	2.21908e+07	1.88008e+06	2.37724e+06	1.29947e+07	1.27643e+06	1.2892e+06	1.21282e+06	1.16491e+07	8.37355e+06	3.98862e+06	3.5766e+06	2.43363e+06	1.89121e+06	1.75112e+07	2.14683e+06
M329T623	Docosapentaenoic acid (22n-3)	329.249	623	330.256	2.35688	C22H34O2	[M-H]-	Fatty Acyls	Fatty acids and conjugates	C16513	Lipid metabolism	24880-45-3	HMDB0006528	BioDeepDB	2	neg	4.45657e+06	3.43804e+06	922813	868017	3.50708e+06	6.51192e+06	5.61098e+06	6.8363e+06	7.18954e+06	5.85964e+06	4.23125e+06	4.90207e+06	7.99981e+06	6.44785e+06	8.11445e+06	8.27345e+06	5.93911e+06	4.04165e+06	3.65534e+06	5.304e+06	3.84194e+06	6.10805e+06	4.87124e+06	4.12973e+06
M331T645	Adrenic acid	331.267	645	332.272	6.94305	C22H36O2	[M-H]-	Fatty Acyls	Fatty acids and conjugates	C16527	Lipid metabolism; Cell growth and death	28874-58-0	HMDB0002226	BioDeepDB	2	neg	2.69116e+06	1.51292e+06	1.79318e+06	2.74792e+06	2.38148e+06	3.67822e+06	3.81135e+06	1.13831e+07	2.14529e+06	1.66187e+06	396170	1.94838e+06	1.71738e+06	1.05731e+06	2.25554e+06	568567	4.02487e+06	3.91639e+06	2.45618e+06	1.06431e+07	3.24726e+06	1.86167e+06	4.19808e+06	1.56906e+06
M345T542	Ginkgoic acid	345.244	541.8	346.251	1.66838	C22H34O3	[M-H]-	Benzene and substituted derivatives	Benzoic acids and derivatives	C10794		22910-60-7	HMDB0033897	BioDeepDB	2	neg	62908.8	20466.8	29388.6	40711.6	152372	137435	217902	141637	2.35658e+06	820948	1.69135e+06	260761	167277	48121.6	37874.6	170537	214151	30719.5	154931	12134.2	69081.7	125984	79567.9	62805.6
M409T479	LysoPA(16_0_0_0)	409.236	479	410.243	0.488715	C19H39O7P	[M-H]-	Glycerophospholipids	Glycerophosphates	C04036			HMDB0007853	BioDeepDB	2	neg	1.27349e+06	721512	354306	331084	3.07748e+06	4.0832e+06	4.5379e+06	4.06944e+06	1.09378e+06	1.19045e+06	3.82012e+06	3.36144e+06	5.37042e+06	3.58475e+06	5.69887e+06	5.01933e+06	5.95325e+06	6.46851e+06	4.13997e+06	5.38925e+06	4.05294e+06	1.66717e+06	6.65054e+06	4.66267e+06
M465T578_2	Cholesterol sulfate	465.305	577.5	466.312	1.88263	C27H46O4S	[M-H]-	Steroids and steroid derivatives	Cholestane steroids	C18043	Lipid metabolism	1256-86-6	HMDB0000653	BioDeepDB	2	neg	7.15052e+08	9.32984e+07	1.55599e+08	3.17479e+07	3.20477e+08	1.7401e+08	2.99714e+08	3.63516e+07	3.7443e+08	7.4318e+07	3.46971e+08	1.71548e+08	1.5225e+08	3.19591e+07	7.21591e+07	1.57287e+08	6.41727e+08	3.88235e+08	4.46767e+08	4.15649e+08	2.13427e+08	2.34227e+08	1.60735e+08	2.48997e+08
M197T529	L-Dopa	196.985	528.9	197.069	12.9164	C9H11NO4	[M]-	Carboxylic acids and derivatives	Amino acids, peptides, and analogues	C00355	Nervous system; Endocrine system; Neurodegenerative disease; Biosynthesis of other secondary metabolites; Amino acid metabolism; Substance dependence; Chemical structure transformation maps; Global and overview maps	59-92-7	HMDB0000181	BioDeepDB	2	neg	3.17199e+06	3.13313e+06	5.51511e+06	4.61977e+06	2.94347e+06	7.42153e+06	4.35353e+06	4.8863e+06	4.42322e+06	4.49884e+06	2.64513e+06	2.81001e+06	2.64944e+06	3.50797e+06	2.60464e+06	5.72998e+06	5.57817e+06	5.05503e+06	4.65575e+06	5.56135e+06	6.32676e+06	4.35412e+06	5.62179e+06	5.1211e+06
M255T343	(2S)-Liquiritigenin	255.073	342.9	256.074	28.1331	C15H12O4	[M-H]-	Flavonoids	Flavans	C09762	Chemical structure transformation maps; Biosynthesis of other secondary metabolites; Global and overview maps	578-86-9	HMDB0029519	MoNA	2	neg	5.42302e+06	4.50969e+06	3.00498e+06	2.13064e+06	2.2679e+06	2.17438e+06	2.15042e+06	3.34201e+06	2.05134e+06	2.00335e+06	1.35678e+06	2.06036e+06	806493	1.88888e+06	2.18841e+06	1.8601e+06	9.10185e+06	5.14746e+06	4.62506e+06	2.13496e+06	2.19175e+06	6.42345e+06	3.28235e+06	1.66726e+06
M271T477	1-(2,6-Dihydroxy-4-methoxyphenyl)-3-phenyl-1-propanone	271.099	476.8	272.105	4.3379	C16H16O4	[M-H]-	Linear 1,3-diarylpropanoids	Chalcones and dihydrochalcones	C09644		35241-55-5	HMDB0034435	MoNA	2	neg	393379	309416	434186	399999	384170	286643	404655	387834	314186	273461	231997	320109	304441	376735	317192	296819	9611.04	23122.4	5137.74	20457.3	117651	14028.2	80649.3	2397.2
M149T342	Benzyl isothiocyanate	149.027	342.5	149.03	18.7885	C8H7NS	[M]-	Benzene and substituted derivatives		C03098		622-78-6	HMDB0033969	MoNA	2	neg	3.49522e+06	3.54361e+06	706089	3.09962e+06	894446	945391	1.49409e+06	4.34076e+06	2.75369e+06	1.82795e+06	2.88841e+06	2.23741e+06	1.20179e+06	4.278e+06	3.33778e+06	3.24988e+06	1.03123e+06	3.26546e+06	6.58169e+06	1.17733e+06	3.05581e+06	3.22649e+06	1.21072e+06	1.00208e+06
M151T289	3-Hydroxyphenylacetic acid	151.041	288.5	152.047	6.16974	C8H8O3	[M-H]-	Phenols	1-hydroxy-4-unsubstituted benzenoids	C05593	Amino acid metabolism; Xenobiotics biodegradation and metabolism; Global and overview maps	621-37-4	HMDB0000440	MoNA	2	neg	1.14402e+06	1.1383e+06	1.0254e+06	980367	1.37386e+06	1.49171e+06	1.48292e+06	1.59312e+06	1.50326e+06	1.44027e+06	1.29197e+06	1.23034e+06	1.94554e+06	1.86108e+06	1.88958e+06	1.94221e+06	1.35389e+06	1.24039e+06	1.35254e+06	1.08827e+06	1.29539e+06	1.50925e+06	1.47095e+06	1.39361e+06
M213T270	Deoxyribose 5-phosphate	213.017	270.2	214.024	1.52101	C5H11O7P	[M-H]-	Organooxygen compounds	Carbohydrates and carbohydrate conjugates	C00673	Carbohydrate metabolism; Global and overview maps	102916-66-5/7685-50-9	HMDB0001031	MoNA	2	neg	805237	630629	1.02603e+06	800030	2.03224e+06	316883	1.67993e+06	1.45984e+06	860280	839069	1.06247e+06	993111	584611	1.94677e+06	1.0852e+06	1.37031e+06	830796	1.23614e+06	1.43429e+06	999217	810382	751493	1.00258e+06	861272
M241T622	Pentadecanoic acid	241.218	622.2	242.225	3.21701	C15H30O2	[M-H]-	Fatty Acyls	Fatty acids and conjugates	C16537		1002-84-2	HMDB0000826	MoNA	2	neg	2.64991e+07	1.44428e+07	1.36731e+07	2.25212e+07	3.3801e+07	3.35317e+07	4.59004e+07	3.49601e+07	1.38777e+07	2.93836e+07	1.8641e+07	1.69867e+07	1.91011e+07	1.95743e+07	2.16098e+07	2.28227e+07	5.48413e+07	4.03371e+07	4.74225e+07	7.22191e+07	3.61166e+07	4.12729e+07	4.13933e+07	4.06826e+07
M317T476	5-KETE	317.212	476.1	318.219	0.554833	C20H30O3	[M-H]-	Fatty Acyls	Fatty acids and conjugates	C14732	Lipid metabolism	126432-17-5/106154-18-1	HMDB0010217	MoNA	2	neg	2.96046e+06	1.56312e+06	2.18445e+06	2.30169e+06	2.05026e+06	2.27259e+06	2.84774e+06	2.4093e+06	2.06051e+06	2.19767e+06	2.50997e+06	2.41395e+06	2.28724e+06	2.42152e+06	2.78025e+06	2.77415e+06	2.32923e+06	2.12634e+06	2.24957e+06	2.18891e+06	3.49861e+06	1.79482e+06	3.09031e+06	1.67588e+06
M335T472	Acebutolol	335.19	472	336.205	22.7453	C18H28N2O4	[M-H]-	Organooxygen compounds	Carbonyl compounds	C06803		37517-30-9	HMDB0015324	MoNA	2	neg	63651.6	58426.6	52269.1	361902	233522	238822	499702	447455	689112	755605	543422	992743	369435	494829	360425	584525	886751	1.09325e+06	387851	1.08278e+06	1.09421e+06	1.08917e+06	826714	503126
M367T685_2	Tetracosanoic acid	367.359	684.9	368.365	3.11745	C24H48O2	[M-H]-	Fatty Acyls	Fatty acids and conjugates	C08320	Lipid metabolism	557-59-5	HMDB0002003	MoNA	2	neg	5.24626e+06	1.82964e+06	3.00522e+06	4.31251e+06	2.65016e+06	4.4921e+06	4.01941e+06	5.06777e+06	3.83816e+06	6.69261e+06	3.82701e+06	3.94994e+06	3.95648e+06	4.58445e+06	5.14888e+06	5.97048e+06	3.36654e+06	1.35704e+06	3.81593e+06	1.32669e+06	1.22348e+06	4.77974e+06	4.44347e+06	5.89688e+06
M369T574_1	Quassin	369.16	574.1	388.189	27.6574	C22H28O6	[M-H2O-H]-	Prenol lipids	Terpene lactones	C08778		76-78-8	HMDB0036587	MoNA	2	neg	2.51825e+07	2.57606e+07	2.10572e+07	1.33007e+07	1.3272e+07	1.03958e+07	4.5531e+06	5.68987e+06	9.5845e+06	1.47013e+06	9.65019e+06	6.60015e+07	1.68546e+07	1.81482e+07	2.17209e+07	1.3508e+07	5.50303e+07	1.9901e+07	6.30276e+06	4.93491e+07	9.01117e+07	1.30245e+07	1.49578e+07	5.54122e+07
M499T444	Perfluorooctanesulfonic acid	498.938	443.5	499.938	15.1843	C8HF17O3S	[M-H]-	Alkyl halides	Alkyl fluorides	C18142		1763-23-1	HMDB0059586	MoNA	2	neg	237100	317681	228496	220997	133712	139403	206777	177391	128659	117968	221083	193660	101963	92887	41238.4	85405	115637	105966	86007.7	120027	127469	227607	52783.6	65207.3
M135T288	o-Toluate	135.046	288.4	136.052	5.74619	C8H8O2	[M-H]-	Benzene and substituted derivatives	Benzoic acids and derivatives	C07215	Xenobiotics biodegradation and metabolism; Global and overview maps	118-90-1	HMDB0002340	mzCloud	2	neg	752052	359258	1.14756e+06	339766	1.22255e+06	355987	570716	473172	462003	413815	644122	609361	531228	406920	417892	337123	481011	566820	432909	441698	453770	482062	516016	674841
M249T296	Citrinin	249.081	295.8	250.084	18.3715	C13H14O5	[M-H]-	Benzopyrans		C16765		518-75-2	HMDB0041857	mzCloud	2	neg	1.7625e+06	2.33512e+06	1.604e+06	1.48348e+06	2.01624e+06	2.02526e+06	1.93063e+06	1.88092e+06	2.94871e+06	2.24469e+06	2.35807e+06	1.76724e+06	1.45913e+06	1.85598e+06	1.62574e+06	1.4361e+06	1.80116e+06	2.81452e+06	1.88642e+06	1.67377e+06	2.01777e+06	1.13872e+06	1.93076e+06	1.95371e+06
M273T325	Phloretin	273.08	324.9	274.084	13.095	C15H14O5	[M-H]-	Linear 1,3-diarylpropanoids	Chalcones and dihydrochalcones	C00774	Biosynthesis of other secondary metabolites; Global and overview maps	60-82-2	HMDB0003306	mzCloud	2	neg	97294.7	104078	462675	125070	1.32968e+06	1.2074e+06	1.44568e+06	1.11147e+06	495429	848000	852009	569390	489343	542397	750999	688119	2.03623e+06	502902	2.1887e+06	2.23444e+06	1.22913e+06	1.63455e+06	1.51584e+06	1.60674e+06
M285T339	Hexadecanedioate	285.208	338.5	286.214	3.77268	C16H30O4	[M-H]-	Fatty Acyls	Fatty acids and conjugates	C19615	Lipid metabolism; Global and overview maps	505-54-4	HMDB0000672	mzCloud	2	neg	3.02997e+06	1.90213e+06	2.24351e+06	1.97131e+06	2.18658e+06	1.69431e+06	3.27562e+06	2.21076e+06	1.74845e+06	4.80566e+06	2.44373e+06	2.18839e+06	2.21612e+06	2.33793e+06	2.7116e+06	2.47798e+06	2.68049e+06	3.61887e+06	2.4121e+06	2.92523e+06	2.82398e+06	2.75886e+06	680063	2.57135e+06
M277T384	2-Ethylhexyl phthalate	277.145	383.5	278.152	1.71751	C16H22O4	[M-H]-	Benzene and substituted derivatives	Benzoic acids and derivatives	C03343		4376-20-9	HMDB0013248	mzCloud	2	neg	2.25941e+06	2.20298e+06	1.48676e+06	5.21446e+06	1.92998e+06	5.7752e+06	1.97751e+06	1.847e+06	2.41457e+06	2.37224e+06	1.90272e+06	1.80436e+06	1.62978e+06	2.10654e+06	1.91358e+06	1.48377e+06	1.40772e+06	2.65931e+06	1.95746e+06	1.71801e+06	1.76346e+06	1.48591e+06	1.98011e+06	2.09732e+06
M313T416	12,13-DHOME	313.24	416	314.246	3.75431	C18H34O4	[M-H]-	Fatty Acyls	Fatty acids and conjugates	C14829	Lipid metabolism		HMDB0004705	mzCloud	2	neg	5.69632e+06	6.56984e+06	1.48062e+06	6.30775e+06	6.09461e+06	5.37938e+06	6.79554e+06	6.78404e+06	6.14836e+06	6.4259e+06	6.62187e+06	6.07675e+06	8.13857e+06	6.32926e+06	5.04618e+06	8.28248e+06	6.08206e+06	9.05342e+06	5.27868e+06	6.73754e+06	5.41119e+06	4.95136e+06	5.99076e+06	7.39051e+06
M301T587	EPA (d5)	301.218	587.3	302.225	3.24017	C20H30O2	[M-H]-	Fatty Acyls	Fatty acids and conjugates	C06428	Lipid metabolism	10417-94-4	HMDB0001999	mzCloud	2	neg	4.80658e+07	3.74616e+07	3.4035e+07	5.36339e+07	3.69124e+07	5.95533e+07	6.45426e+07	5.76267e+07	4.2538e+07	4.53433e+07	5.71125e+07	5.3407e+07	5.21025e+07	4.66723e+07	5.08811e+07	5.36216e+07	9.15668e+07	7.39013e+07	6.91139e+07	6.96072e+07	9.7135e+07	4.57751e+07	6.3754e+07	4.50353e+07
M455T619_1	Ursolic acid	455.353	619.1	456.36	0.386513	C30H48O3	[M-H]-	Prenol lipids	Triterpenoids	C08988		77-52-1	HMDB0002395	mzCloud	2	neg	6.73393e+08	2.38074e+08	5.82352e+08	6.94386e+08	5.04867e+08	9.17832e+08	1.11989e+09	1.19662e+09	6.74331e+08	7.36643e+08	7.34182e+08	1.38951e+09	1.73483e+08	4.82883e+08	2.09192e+08	2.29811e+08	9.19319e+08	1.41436e+09	9.40819e+08	1.40723e+09	7.91331e+08	2.19922e+08	6.16678e+08	9.22996e+08
M102T53_2	Triethylamine	102.128	53.5	101.12	0.00529945	C6H15N	[M+H]+	Amines	Tertiary amines	C14691		121-44-8	HMDB0032539	BioDeepDB	1	pos	1.17915e+06	1.49707e+06	733947	1.40425e+06	1.61278e+06	1.58116e+06	751089	869471	1.68864e+06	1.74351e+06	1.06383e+06	1.51335e+06	461634	1.03456e+06	434057	1.65852e+06	1.6773e+06	1.87106e+06	1.267e+06	1.79141e+06	2.0371e+06	1.74637e+06	723996	2.08281e+06
M103T588	4-Hydroxystyrene	103.05	588.1	120.058	3.24113	C8H8O	[M+H-H2O]+	Benzene and substituted derivatives	Styrenes	C05627	Biosynthesis of other secondary metabolites	2628-17-3	HMDB0004072	BioDeepDB	1	pos	8.84426e+06	1.12565e+07	1.14479e+07	1.75018e+07	3.67092e+06	1.76474e+07	3.67205e+06	3.32783e+06	1.60586e+07	1.3097e+07	3.04092e+06	1.01552e+07	8.0162e+06	8.8319e+06	9.40626e+06	1.78476e+07	1.12003e+07	4.25361e+06	4.32796e+06	2.07194e+07	1.13711e+07	4.89954e+06	1.31992e+07	4.51645e+06
M104T48	2-Aminoisobutyric acid	104.071	47.7	103.063	0.146971	C4H9NO2	[M+H]+	Carboxylic acids and derivatives	Amino acids, peptides, and analogues	C03665		62-57-7	HMDB0001906	BioDeepDB	1	pos	7.16796e+06	735398	730488	860331	432683	6.42364e+06	745824	6.77558e+06	6.67125e+06	6.95049e+06	669129	873888	6.59693e+06	6.5591e+06	753468	6.58789e+06	6.90199e+06	783802	6.92538e+06	1.16299e+06	6.84454e+06	7.07566e+06	6.85642e+06	343747
M105T653	Alpha-Hydroxyisobutyric acid	105.111	652.8	104.105	6.43129	C4H8O3	[M+H]+	Organooxygen compounds	Alcohols and polyols			594-61-6	HMDB0000729	BioDeepDB	1	pos	4.19745e+06	4.11972e+06	1.93079e+06	4.13139e+06	3.78986e+07	4.84446e+06	2.35453e+06	3.41477e+07	2.43032e+07	5.65984e+07	4.36943e+06	2.28809e+07	2.93069e+06	6.07062e+07	2.14719e+06	1.54695e+07	4.03421e+06	2.71706e+07	4.79954e+06	3.63151e+06	2.10299e+07	1.85914e+07	2.48167e+06	3.50541e+06
M106T48	L-Serine	106.05	47.7	105.043	0.928998	C3H7NO3	[M+H]+	Carboxylic acids and derivatives	Amino acids, peptides, and analogues	C00065	Cancer: overview; Membrane transport; Metabolism of other amino acids; Chemical structure transformation maps; Drug resistance: antimicrobial; Signal transduction; Digestive system; Lipid metabolism; Carbohydrate metabolism; Biosynthesis of other secondary metabolites; Translation; Amino acid metabolism; Energy metabolism; Global and overview maps	56-45-1	HMDB0000187	BioDeepDB	1	pos	213141	180833	224432	873037	217053	164118	730457	1.12185e+06	112385	1.07208e+06	128961	102845	119297	81197.7	89823.2	97848.6	3.3524e+06	3.77743e+06	5.46916e+06	5.23397e+06	3.57569e+06	3.02482e+06	1.76933e+06	2.31047e+06
M106T46	Diethanolamine	106.087	46.2	105.079	1.86786	C4H11NO2	[M+H]+	Organonitrogen compounds	Amines	C06772	Lipid metabolism	111-42-2	HMDB0004437	BioDeepDB	1	pos	1.40452e+07	7.48991e+06	9.99426e+06	1.01498e+07	8.06253e+06	3.85263e+06	1.26735e+07	5.74247e+06	7.45629e+06	1.11072e+07	8.17547e+06	7.08368e+06	2.28116e+06	1.83037e+06	2.88922e+06	2.7616e+06	1.09097e+07	6.44458e+06	5.13645e+06	1.06962e+07	1.53463e+06	3.14297e+06	3.64578e+06	5.33464e+06
M108T53	Benzylamine	108.081	53.5	107.073	0.858934	C7H9N	[M+H]+	Benzene and substituted derivatives	Phenylmethylamines	C15562		100-46-9	HMDB0033871	BioDeepDB	1	pos	1.32519e+06	919697	951348	1.10133e+06	873619	921663	682195	1.02503e+06	885935	779571	867220	1.03789e+06	1.05952e+06	932781	1.00928e+06	889897	838245	875569	872018	923476	1.04581e+06	1.44416e+06	610606	1.01275e+06
M110T58	1-Methylguanidine hydrochloride	109.522	57.7	109.041	1.08559	C2H8ClN3	[M+H]+					21770-81-0		BioDeepDB	1	pos	29674.3	239387	153368	117299	222549	403714	193042	81673.8	221806	357158	320450	176071	152509	131069	175718	148615	92794	393065	194865	98834.2	273196	146864	169276	125502
M112T600_2	Uracil	112.018	600.5	112.027	0.0274614	C4H4N2O2	[M]+	Diazines	Pyrimidines and pyrimidine derivatives	C00106	Metabolism of cofactors and vitamins; Metabolism of other amino acids; Global and overview maps; Nucleotide metabolism	66-22-8	HMDB0000300	BioDeepDB	1	pos	4.70379e+07	4.62763e+07	4.81938e+07	2.87861e+07	3.58744e+07	4.7414e+07	4.30527e+07	3.25697e+07	5.79019e+07	5.82436e+07	5.50028e+07	6.1092e+07	7.19203e+07	3.80468e+07	4.23376e+07	4.69447e+07	5.39822e+07	5.06112e+07	4.4742e+07	6.61345e+07	8.12041e+07	4.68992e+07	8.63428e+07	6.23592e+07
M112T51	Cytosine	112.051	50.8	111.043	1.35979	C4H5N3O	[M+H]+	Diazines	Pyrimidines and pyrimidine derivatives	C00380	Global and overview maps; Nucleotide metabolism	71-30-7	HMDB0000630	BioDeepDB	1	pos	2.07368e+06	3.44297e+06	1.44502e+06	1.20787e+06	1.3571e+06	1.5058e+06	1.73436e+06	1.08435e+06	3.31544e+06	4.32567e+06	2.61565e+06	2.60907e+06	3.55056e+06	2.33387e+06	1.25058e+06	629404	2.26877e+06	2.4239e+06	2.17288e+06	2.18607e+06	2.37996e+06	845504	2.47583e+06	1.93738e+06
M115T51	Dihydrouracil	115.017	51	114.043	0.214917	C4H6N2O2	[M+H]+	Diazines	Pyrimidines and pyrimidine derivatives	C00429	Metabolism of cofactors and vitamins; Metabolism of other amino acids; Global and overview maps; Nucleotide metabolism	504-07-4	HMDB0000076	BioDeepDB	1	pos	713423	543976	2.96893e+06	3.49461e+06	4.25387e+06	715980	2.83132e+06	4.32221e+06	680585	654287	491551	4.03938e+06	2.76823e+06	3.76242e+06	3.50264e+06	1.93851e+06	588348	4.10203e+06	2.82292e+06	1.01208e+07	3.75236e+06	3.75596e+06	683500	485720
M116T40	Methylacetoacetic acid	116.002	40.4	116.047	2.72717	C5H8O3	[M]+	Keto acids and derivatives	Beta-keto acids and derivatives			105-45-3	HMDB0000310	BioDeepDB	1	pos	1.75347e+06	1.5449e+06	1.80646e+06	1.67568e+06	1.63688e+06	1.56943e+06	1.64932e+06	1.01945e+06	1.52578e+06	1.443e+06	1.70785e+06	1.02603e+06	1.70205e+06	1.70566e+06	1.53374e+06	1.73256e+06	1.63802e+06	977662	1.77295e+06	1.63668e+06	1.90971e+06	1.64678e+06	1.55515e+06	1.61271e+06
M117T60	Levulinic acid	117.103	60.1	116.115	0.00488105	C5H8O3	[M+H]+	Organooxygen compounds	Carbonyl compounds			123-76-2	HMDB0000720	BioDeepDB	1	pos	187061	111852	521279	348845	1.14254e+06	448453	1.65601e+06	824358	637241	339455	423662	1.05696e+06	2.33739e+06	1.37514e+06	3.24446e+06	1.43696e+06	451055	316706	526493	451703	659186	1.41656e+06	413599	602877
M120T48	L-Threonine	120.066	47.8	119.058	0.556708	C4H9NO3	[M+H]+	Carboxylic acids and derivatives	Amino acids, peptides, and analogues	C00188	Metabolism of cofactors and vitamins; Membrane transport; Digestive system; Biosynthesis of other secondary metabolites; Translation; Amino acid metabolism; Chemical structure transformation maps; Global and overview maps	72-19-5	HMDB0000167	BioDeepDB	1	pos	298395	213272	363305	371467	307276	239296	307635	236085	100463	208053	168714	204629	24717.8	129692	149050	49360.3	824083	703263	559797	870214	161136	176303	189537	220314
M138T50	4-Hydroxybenzoic acid	138.055	50	138.032	1.94628	C7H6O3	[M]+	Benzene and substituted derivatives	Benzoic acids and derivatives	C00156	Metabolism of cofactors and vitamins; Skeleton-based classification; Xenobiotics biodegradation and metabolism; Chemical structure transformation maps; Global and overview maps	99-96-7 / 456-23-5	HMDB0000500	BioDeepDB	1	pos	4.73651e+06	6.94064e+06	5.05692e+06	5.46701e+06	5.77239e+06	6.57378e+06	5.57334e+06	4.62472e+06	2.959e+06	4.84116e+06	4.07195e+06	6.86337e+06	7.39319e+06	9.46968e+06	5.42059e+06	4.91877e+06	6.62949e+06	7.97729e+06	5.67974e+06	3.64025e+06	4.73053e+06	7.41699e+06	4.48621e+06	3.97368e+06
M122T43	L-Cysteine	122.02	43	121.02	0.125752	C3H7NO2S	[M+H]+	Carboxylic acids and derivatives	Amino acids, peptides, and analogues	C00097	Cancer: overview; Metabolism of cofactors and vitamins; Metabolism of other amino acids; Chemical structure transformation maps; Cell growth and death; Digestive system; Biosynthesis of other secondary metabolites; Translation; Amino acid metabolism; Folding, sorting and degradation; Energy metabolism; Global and overview maps	52-90-4	HMDB0000574	BioDeepDB	1	pos	101174	110543	103508	104959	99705.4	109413	104428	97563.2	97931	96382.1	104645	100666	103925	116085	112397	122129	97049.4	101063	101098	106648	122286	99043.6	115774	106223
M129T222	Quinoline	129.103	221.5	129.058	3.78136	C9H7N	[M]+	Quinolines and derivatives		C06413		91-22-5	HMDB0033731	BioDeepDB	1	pos	248082	237761	241419	247432	248971	248076	255179	247705	246751	243141	249812	253801	255086	250269	263243	247744	263249	271346	245999	250584	263027	272537	178927	277371
M129T40_2	Pipecolic acid	129.021	40.2	129.079	2.95923	C6H11NO2	[M]+	Carboxylic acids and derivatives	Amino acids, peptides, and analogues	C00408	Chemical structure transformation maps; Amino acid metabolism; Biosynthesis of other secondary metabolites; Global and overview maps	535-75-1 / 3105-95-1	HMDB0000070	BioDeepDB	1	pos	2.85942e+06	2.26365e+06	3.16109e+06	3.52052e+06	2.73549e+06	2.68092e+06	577524	673396	727817	825364	2.97499e+06	2.76567e+06	2.789e+06	2.24937e+06	3.16618e+06	2.31292e+06	2.2693e+06	1.87385e+06	2.09639e+06	1.62812e+06	989616	1.15443e+06	980644	767727
M132T49	Glycyl-glycine	132.077	48.7	132.054	0.597795	C4H8N2O3	[M]+	Carboxylic acids and derivatives	Amino acids, peptides, and analogues	C02037		556-50-3	HMDB0011733	BioDeepDB	1	pos	443595	1.79163e+06	321594	1.64067e+06	301928	584929	1.92202e+06	366254	334095	222577	311922	307478	1.40187e+06	232187	1.05929e+06	1.27348e+06	1.3673e+06	1.67646e+06	607167	640278	678088	1.9781e+06	276351	1.69903e+06
M138T89	2-Hydroxyphenethylamine	138.092	89.3	137.084	1.82404	C8H11NO	[M+H]+	Organonitrogen compounds	Amines	C02735		7568-93-6	HMDB0001065	BioDeepDB	1	pos	338489	443653	479256	444334	253245	242490	249214	360084	237552	227239	205632	165592	665459	701419	52657.5	561920	547640	451590	316600	239627	227102	273141	602696	337947
M141T253	Allantoin	141.037	252.8	158.044	4.49527	C4H6N4O3	[M+H-H2O]+	Azoles	Imidazoles	C01551		97-59-6	HMDB0000462	BioDeepDB	1	pos	1.37535e+06	1.40788e+06	1.40118e+06	1.35224e+06	1.62866e+06	2.5666e+06	654746	688256	1.47974e+06	1.46707e+06	1.67384e+06	1.44084e+06	1.69724e+06	1.24842e+06	1.40013e+06	1.7788e+06	1.21734e+06	943155	1.6131e+06	1.26955e+06	1.49273e+06	1.33857e+06	1.44724e+06	1.92046e+06
M142T40	5-Hydroxymethyluracil	142.034	40.5	142.038	26.0501	C5H6N2O3	[M]+	Diazines	Pyrimidines and pyrimidine derivatives	C03088		4433-40-3	HMDB0000469	BioDeepDB	1	pos	438783	434687	567729	383272	530002	559470	398386	399524	155613	460712	542575	528615	419256	498627	469937	553937	409600	305123	440495	398189	459366	390758	139658	143760
M146T56	Monomethyl glutaric acid	145.99	56.1	146.141	4.43467	C6H10O4	[M]+	Carboxylic acids and derivatives	Carboxylic acid derivatives			1501-27-5	HMDB0000858	BioDeepDB	1	pos	1.4393e+07	1.27411e+07	1.60388e+07	1.54235e+07	2.93158e+06	2.55192e+06	3.38338e+06	2.28369e+06	3.64651e+06	4.24875e+06	3.7546e+06	2.86467e+06	2.65637e+06	2.44892e+06	2.41058e+06	2.17646e+06	9.88035e+06	9.24052e+06	9.7556e+06	8.78037e+06	5.38682e+06	4.87346e+06	4.82781e+06	5.20134e+06
M149T503	6-Methylmercaptopurine	149.024	503.1	166.031	0.228151	C6H6N4S	[M+H-H2O]+	Imidazopyrimidines	Purines and purine derivatives	C16614	Xenobiotics biodegradation and metabolism	50-66-8	HMDB0060412	BioDeepDB	1	pos	2.07158e+06	2.20875e+06	2.16356e+06	2.14511e+06	2.09176e+06	2.17208e+06	2.15862e+06	1.99295e+06	2.11019e+06	2.37375e+06	2.03878e+06	2.1911e+06	2.11125e+06	2.01883e+06	2.26897e+06	2.28829e+06	2.0978e+06	2.14612e+06	2.17028e+06	1.8581e+06	2.11522e+06	2.13202e+06	1.93463e+06	1.84939e+06
M168T312	Quinolinic acid	168.03	312.3	167.022	1.92823	C7H5NO4	[M+H]+	Pyridines and derivatives	Pyridinecarboxylic acids and derivatives	C03722	Metabolism of cofactors and vitamins; Metabolism of other amino acids; Amino acid metabolism; Chemical structure transformation maps; Global and overview maps	89-00-9	HMDB0000232	BioDeepDB	1	pos	562622	725496	125361	89239.5	177705	121592	246963	163324	110823	137649	107599	138895	98307.9	76886.4	96545.7	380251	66827.2	77667.1	73847.7	58143.4	103081	104513	67962.1	139361
M153T270	Xanthine	153.091	270	152.033	1.94797	C5H4N4O2	[M+H]+	Imidazopyrimidines	Purines and purine derivatives	C00385	Chemical structure transformation maps; Biosynthesis of other secondary metabolites; Global and overview maps; Nucleotide metabolism	69-89-6	HMDB0000292	BioDeepDB	1	pos	166449	136690	152859	153545	67940.4	69313.1	82032	55910.9	76289.7	72138.7	82340.8	82105.2	49203.3	51766.6	36877.5	53593.8	222817	257718	227679	200197	103306	94392.4	78688.7	93176
M153T73	(S)-3-Aminodihydrothiophen-2(3H)-one hydrochloride	153.002	73	153.002	1.30717	C4H8ClNOS	[M]+					31828-68-9		BioDeepDB	1	pos	924258	758180	935927	361141	663903	782924	296617	778655	750036	700470	362454	853972	702750	693907	784435	639663	677683	371830	637405	314887	1.17997e+06	926538	937246	1.12692e+06
M157T60	Orotic acid monohydrate	157.018	59.6	174.028	13.7946	C5H6N2O5	[M+H-H2O]+					50887-69-9		BioDeepDB	1	pos	1.29777e+06	816385	962326	783193	582450	933150	671543	699216	721682	766852	1.43657e+06	659234	733298	646417	903689	604662	657396	649342	703679	744135	943610	891422	812701	840025
M157T44	3-Indoleacetonitrile	157.084	44.4	156.069	14.8164	C10H8N2	[M+H]+	Indoles and derivatives	Indoles	C02938	Amino acid metabolism; Global and overview maps	771-51-7	HMDB0006524	BioDeepDB	1	pos	228479	262548	284259	86477.7	85693.8	107178	309753	303976	96214.9	235321	219221	185647	176153	192350	124200	224261	163860	289906	80684.2	240248	216448	259152	50698.8	94375.5
M160T33	Pimelic acid	159.971	32.8	160.074	9.80511	C7H12O4	[M]+	Fatty Acyls	Fatty acids and conjugates	C02656	Metabolism of cofactors and vitamins; Global and overview maps	111-16-0	HMDB0000857	BioDeepDB	1	pos	1.77388e+07	1.58967e+07	1.66422e+07	1.67509e+07	1.71753e+07	1.52853e+07	1.84761e+07	1.6188e+07	1.70753e+07	1.6848e+07	1.68315e+07	1.63893e+07	1.68883e+07	1.517e+07	1.7138e+07	1.50282e+07	1.19065e+07	1.52479e+07	1.53175e+07	1.61237e+07	1.62441e+07	1.69627e+07	1.6701e+07	1.7644e+07
M179T56	Sodium mercaptopyruvate dihydrate	178.991	56.2	177.991	4.51628	C3H7NaO5S	[M+H]+					10255-67-1		BioDeepDB	1	pos	7.19759e+06	5.29028e+06	7.78053e+06	2.02553e+06	1.7253e+06	5.81568e+06	1.08129e+06	882204	7.3803e+06	6.47162e+06	8.14275e+06	7.04658e+06	8.81716e+06	6.30945e+06	6.42777e+06	6.60713e+06	1.40805e+06	1.44889e+06	4.89637e+06	5.03358e+06	5.15166e+06	7.03346e+06	5.09498e+06	1.43759e+07
M164T48_2	L-Fucose	164.092	48.3	164.069	2.89545	C6H12O5	[M]+	Organooxygen compounds	Carbohydrates and carbohydrate conjugates	C00507	Carbohydrate metabolism; Global and overview maps	2438-80-4 / 3615-41-6 73-34-7 / 3615-41-6	HMDB0000174	BioDeepDB	1	pos	3.26824e+06	1.19658e+06	1.25124e+06	1.17792e+06	1.34898e+06	5.69089e+06	1.47376e+06	1.10533e+06	2.21029e+06	2.2996e+06	2.5856e+06	3.08897e+06	3.73618e+06	4.18153e+06	1.77041e+06	2.03645e+06	1.4912e+06	1.56856e+06	1.82205e+06	1.03516e+06	3.331e+06	2.02602e+06	2.2561e+06	2.13161e+06
M183T59	(S)-3-Acetoxy-2-aminopropanoic acid hydrochloride	183.029	59.3	183.03	6.55635	C5H10ClNO4	[M]+					66638-22-0		BioDeepDB	1	pos	3.58301e+06	2.81161e+06	5.06022e+06	4.22447e+06	2.88279e+06	3.20517e+06	3.67171e+06	5.35927e+06	2.34484e+06	3.09808e+06	2.4943e+06	3.11224e+06	4.20518e+06	4.34011e+06	3.14874e+06	2.99906e+06	3.98966e+06	3.91773e+06	3.4208e+06	3.14527e+06	3.43253e+06	3.32561e+06	3.63888e+06	2.85711e+06
M168T63	L-Ornithine hydrochloride	168.013	62.8	168.067	1.61817	C5H13ClN2O2	[M]+					3184-13-2		BioDeepDB	1	pos	1.37248e+08	1.15749e+08	1.37476e+08	1.59981e+08	3.50863e+07	3.40597e+07	3.92393e+07	2.87173e+07	3.72688e+07	4.28813e+07	4.58874e+07	3.51405e+07	1.91666e+07	7.10059e+06	1.81322e+07	3.19704e+07	1.01615e+08	1.00796e+08	9.13473e+07	8.85806e+07	4.97552e+07	5.2704e+07	5.0094e+07	4.83456e+07
M169T40_1	329-63-5	169.009	40.2	168	11.9757		[M+H]+					329-63-5		BioDeepDB	1	pos	418473	356764	343708	338194	199813	146343	211610	208675	301466	355038	356366	293217	169910	190380	147092	205085	950366	783299	916686	882191	524455	452189	433832	414077
M170T596	Pyridoxine	170.095	596.4	169.074	1.47322	C8H11NO3	[M+H]+	Pyridines and derivatives	Pyridoxines	C00314	Metabolism of cofactors and vitamins; Global and overview maps	65-23-6	HMDB0000239	BioDeepDB	1	pos	851189	691969	1.37299e+06	811416	2.67371e+06	2.97051e+06	2.54307e+06	1.37382e+06	2.3483e+06	2.10558e+06	1.69533e+06	1.80498e+06	1.38935e+06	1.4109e+06	2.39042e+06	2.36265e+06	1.20751e+06	3.92547e+06	3.06235e+06	883429	1.94829e+06	1.38297e+06	2.70251e+06	1.70636e+06
M171T233	1-Hydroxy-2-naphthoate	171.04	233.3	188.047	3.12207	C11H8O3	[M+H-H2O]+			C03203	Xenobiotics biodegradation and metabolism; Global and overview maps	86-48-6		BioDeepDB	1	pos	608149	533473	619464	688178	141206	136814	159596	135426	160830	175295	188884	131512	32532	35769.4	17622.6	146689	429613	435004	372813	382244	211516	237902	224783	207465
M173T387	Quinaldic acid	173.165	386.7	173.048	2.35215	C10H7NO2	[M]+	Quinolines and derivatives	Quinoline carboxylic acids	C06325		93-10-7	HMDB0000842	BioDeepDB	1	pos	201297	126749	217929	148158	193639	194913	95985.5	139897	136745	199637	143103	140546	201463	139440	154857	188730	113360	183938	195916	119223	99020.6	173033	13175.4	95461.2
M175T411	1H-Indole-3-acetamide	175.149	411.1	174.079	0.940607	C10H10N2O	[M+H]+	Indoles and derivatives	Indoles	C02693	Amino acid metabolism; Global and overview maps	879-37-8	HMDB0029739	BioDeepDB	1	pos	8.46728e+06	7.46237e+06	8.0101e+06	7.18209e+06	8.08079e+06	7.78633e+06	8.01064e+06	8.22534e+06	9.62739e+06	9.81877e+06	8.99503e+06	8.75322e+06	7.65441e+06	8.06662e+06	8.3065e+06	6.99566e+06	1.04653e+07	1.01551e+07	9.06768e+06	9.71485e+06	8.09568e+06	7.8318e+06	8.22853e+06	7.83232e+06
M174T56	5-Hydroxyindoleacetic acid	173.981	56	191.058	18.2491	C10H9NO3	[M+H-H2O]+	Indoles and derivatives	Indolyl carboxylic acids and derivatives	C05635	Amino acid metabolism; Nervous system; Global and overview maps	54-16-0	HMDB0000763	BioDeepDB	1	pos	2.71821e+06	2.00414e+06	2.50606e+06	2.13065e+06	1.8467e+06	2.64354e+06	2.08305e+06	1.92528e+06	2.23256e+06	1.92224e+06	2.55153e+06	3.04267e+06	2.31518e+06	2.61304e+06	3.14527e+06	2.35231e+06	3.0516e+06	1.83759e+06	2.58271e+06	2.57407e+06	5.39415e+06	4.08565e+06	3.63338e+06	4.89364e+06
M175T315	N-Methyltryptamine	175.189	315.4	174.116	29.1175	C11H14N2	[M+H]+	Indoles and derivatives	Tryptamines and derivatives	C06213	Amino acid metabolism; Global and overview maps	61-49-4	HMDB0004370	BioDeepDB	1	pos	103843	56724.8	117107	115033	196539	62380.4	52929.6	57749.6	193217	143675	81405.5	57383.2	56430.8	50060.7	132195	755426	425652	874293	480123	205213	63553.6	120307	49681.9	257253
M176T356	cadaverine dihydrochloride	176.107	355.9	175.1	1.27195	C5H16Cl2N2	[M+H]+	Organonitrogen compounds	Amines			1476-39-7 /		BioDeepDB	1	pos	238296	216987	343140	208123	948110	258608	202184	987743	980975	953513	978254	978877	939764	94408.1	134563	169370	254488	181410	256124	264345	921834	953050	934895	894415
M180T264	D-Psicose	180.081	263.9	180.063	16.2371	C6H12O6	[M-H2O+NH4]+			C06468		551-68-8		BioDeepDB	1	pos	260262	219255	234445	224288	180951	189612	194971	212732	117608	158776	54467.6	146168	231111	141617	180887	226039	232506	239680	255437	231506	198161	274578	231623	202144
M181T56	Methionine sulfoximine	180.99	56	180.057	2.60125	C5H12N2O3S	[M+H]+	Carboxylic acids and derivatives	Amino acids, peptides, and analogues	C03510		1982-67-8 / 15985-39-4	HMDB0029430	BioDeepDB	1	pos	2.7505e+06	2.11939e+06	2.48845e+06	2.14419e+06	1.99753e+06	2.06128e+06	2.45521e+06	2.1625e+06	2.62007e+06	2.69213e+06	2.65458e+06	1.85829e+06	1.64008e+06	1.62874e+06	1.80144e+06	646025	2.99478e+06	6.619e+06	3.36185e+06	3.40073e+06	1.95878e+06	627091	2.76024e+06	2.33035e+06
M181T81	4-Hydroxyphenylpyruvic acid	181.026	80.8	180.042	4.18957	C9H8O4	[M+H]+	Benzene and substituted derivatives	Phenylpyruvic acid derivatives	C01179		156-39-8	HMDB0000707	BioDeepDB	1	pos	3.01634e+06	3.01107e+06	3.06567e+06	3.09526e+06	3.01821e+06	3.31218e+06	3.08984e+06	3.03992e+06	3.21212e+06	3.24113e+06	3.07207e+06	3.05248e+06	2.98812e+06	3.15927e+06	3.10932e+06	3.1102e+06	2.91641e+06	3.15387e+06	3.04051e+06	2.9328e+06	3.08489e+06	2.9429e+06	3.05456e+06	3.03765e+06
M181T345	Theophylline	181.134	345	180.065	2.62628	C7H8N4O2	[M+H]+	Imidazopyrimidines	Purines and purine derivatives	C07130	Chemical structure transformation maps; Biosynthesis of other secondary metabolites; Global and overview maps	58-55-9	HMDB0001889	BioDeepDB	1	pos	250003	296682	302584	271995	346216	331426	347798	334581	382884	330180	356955	384121	300032	296609	254050	292733	340896	346784	289358	451156	234826	375592	427418	341617
M183T236	Mannitol	183.102	235.6	182.079	2.54712	C6H14O6	[M+H]+	Organooxygen compounds	Carbohydrates and carbohydrate conjugates	C00392	Carbohydrate metabolism; Membrane transport; Global and overview maps	69-65-8	HMDB0000765	BioDeepDB	1	pos	201891	1.44232e+06	1.37233e+06	255317	61109.3	37913.2	406714	77631.3	73244.2	105387	166245	638213	26909.2	17119	22590.4	58961.7	1.04178e+06	1.33164e+06	1.14034e+06	1.29451e+06	656662	666513	546659	756959
M183T41	Histamine dihydrochloride	182.903	40.5	183.033	0.0827582	C5H11Cl2N3	[M]+					56-92-8		BioDeepDB	1	pos	650566	838235	704495	688108	635653	623860	608707	629942	569291	606097	723034	736906	677768	665136	742971	614560	574118	567817	652499	628290	494533	719138	518066	532922
M185T50	Lithium potassium acetyl phosphate	184.96	50.2	183.952	4.99567	C2H3KLiO5P	[M+H]+					94249-01-1		BioDeepDB	1	pos	418660	405613	399079	405711	417328	402719	419555	391437	408937	395258	393797	399946	421162	411398	409614	412498	418026	399969	422266	398710	415343	407914	415260	429947
M186T57	Sodium phenylpyruvate	186.149	56.9	186.029	4.19855	C9H7NaO3	[M]+					114-76-1		BioDeepDB	1	pos	371047	361098	353386	433139	135645	122847	129491	94499.2	117586	140522	147159	150510	40788.9	29674.1	139351	126875	259657	255209	227933	196127	157604	160482	160280	230700
M188T183	N-Alpha-acetyllysine	188.071	183.1	188.116	3.01138	C8H16N2O3	[M]+	Carboxylic acids and derivatives	Amino acids, peptides, and analogues	C12989		1946-82-3	HMDB0000446	BioDeepDB	1	pos	832227	9288.05	100467	265755	34147.6	438649	315188	380459	276927	33270	384413	612548	268377	331475	337705	360634	8151.71	9686.92	259056	7099.4	893394	79235.5	437258	49661
M190T51	Kynurenic acid	189.977	50.9	189.043	14.1711	C10H7NO3	[M+H]+	Quinolines and derivatives	Quinoline carboxylic acids	C01717	Amino acid metabolism; Global and overview maps	492-27-3	HMDB0000715	BioDeepDB	1	pos	359953	528265	588629	763826	525768	709785	380715	629139	495544	452822	211678	333265	452157	570994	475416	301125	561857	693503	211957	166681	528757	732733	181228	271433
M190T48	Methyl (indol-3-yl)acetate	190.02	48.4	189.079	20.9447	C11H11NO2	[M+H]+			C20635		1912-33-0		BioDeepDB	1	pos	766530	755816	693400	655896	1.00749e+06	944953	859937	967222	932806	901262	919404	1.12987e+06	809136	799873	799501	747617	390640	1.18303e+06	981440	888909	1.10359e+06	863151	869263	921915
M191T55	N-Acetyl-DL-methionine	190.989	55	191.062	8.58307	C7H13NO3S	[M]+					1115-47-5	HMDB0011745	BioDeepDB	1	pos	1.97374e+06	2.71351e+07	8.52594e+06	1.20445e+07	1.18643e+07	1.21408e+07	731185	3.20736e+07	3.69165e+06	2.67867e+07	9.46133e+06	2.04152e+07	9.45495e+06	1.10432e+07	2.55632e+06	1.65473e+07	3.25283e+07	1.46298e+07	2.59235e+07	1.65936e+07	2.90423e+07	1.86807e+07	8.41577e+06	9.51014e+06
M196T418	Selenomethionine	196.105	418	196.106	4.99731	C5H11NO2Se	[M]+	Carboxylic acids and derivatives	Amino acids, peptides, and analogues			1464-42-2 / 3211-76-5	HMDB0003966	BioDeepDB	1	pos	116675	101254	188067	55665.8	27271.5	32896.9	24798.3	25784.5	20753.7	44864.8	90517.2	51894.2	84341.9	80718.5	52834.8	74178.9	35188.3	54003.3	74033.4	66380.9	61136.2	64460.5	85610.2	111685
M197T498	DL-Dopa	197.097	498	197.188	1.5127	C9H11NO4	[M]+	Carboxylic acids and derivatives	Amino acids, peptides, and analogues			63-84-3	HMDB0000609	BioDeepDB	1	pos	1.54396e+06	1.23068e+06	798332	522769	1.67522e+06	2.30108e+06	719166	1.15868e+06	1.24074e+06	1.00307e+06	930286	967336	1.1065e+06	1.01077e+06	696876	1.16593e+06	1.46885e+06	1.50704e+06	672507	501594	813403	1.68547e+06	1.221e+06	742588
M198T41	87-51-4	197.927	41	215	2.00281		[M+H-H2O]+					87-51-4		BioDeepDB	1	pos	2.82199e+06	2.90862e+06	2.8358e+06	2.9224e+06	2.70717e+06	2.6422e+06	2.82668e+06	2.81528e+06	2.8073e+06	2.80892e+06	2.7512e+06	2.91759e+06	2.88056e+06	2.68343e+06	2.73726e+06	2.79434e+06	2.70345e+06	2.86515e+06	2.61051e+06	2.87893e+06	2.71268e+06	2.83615e+06	2.46594e+06	2.73743e+06
M375T569_1	NP-002336	375.251	569.1	392.256	6.02192	C23H36O5	[M+H-H2O]+	Endogenous Metabolites; Natural Products/Medicines						mzCloud	1	pos	6.41311e+07	1.04212e+08	8.98832e+07	7.71525e+07	7.76232e+07	7.70055e+07	8.48001e+07	9.30135e+07	9.71237e+07	8.84356e+07	8.70201e+07	1.01282e+08	1.15233e+08	9.25404e+07	7.8214e+07	1.03454e+08	7.35685e+07	7.84746e+07	8.19707e+07	8.61159e+07	8.51512e+07	8.07182e+07	8.74966e+07	8.3538e+07
M219T423	Cis-zeatin	219.138	422.7	219.112	0.500116	C10H13N5O	[M]+	Imidazopyrimidines	Purines and purine derivatives	C00371	Chemical structure transformation maps; Signal transduction; Global and overview maps; Metabolism of terpenoids and polyketides	1637-39-4 / 32771-64-5	HMDB0012204	BioDeepDB	1	pos	884465	791013	571003	457278	733252	668549	890689	625745	739832	709211	802692	897048	939225	538827	582283	847927	671289	532900	782516	855011	822047	829352	726426	711534
M203T481	Spermine	203.143	481	202.216	0.80786	C10H26N4	[M+H]+	Organonitrogen compounds	Amines	C00750	Metabolism of cofactors and vitamins; Metabolism of other amino acids; Digestive system; Amino acid metabolism; Global and overview maps	71-44-3	HMDB0001256	BioDeepDB	1	pos	593550	575405	540117	619792	231729	361683	420316	245673	372114	459398	556773	357069	282177	397567	541340	311695	382038	1.29022e+06	359773	632960	442542	408936	411097	281433
M204T301	Acetylcarnitine	204.175	300.7	203.236	0.795646	C9H17NO4	[M+H]+	Carboxylic acids and derivatives	Carboxylic acid derivatives			870-77-9 /		BioDeepDB	1	pos	60146.9	62722	55087.6	65397.7	56410.7	61404.9	79249.7	63368.6	63270.8	57623	57986.8	52874.7	76310.6	51189.5	67542.5	58568.9	74606.4	69009.8	61488.9	71649	69367.1	68895.6	52588.6	71623.8
M206T51	Lipoamide	205.988	50.8	205.06	0.196035	C8H15NOS2	[M+H]+	Dithiolanes	Lipoamides	C00248		940-69-2	HMDB0000962	BioDeepDB	1	pos	197914	568405	761218	541718	199146	794178	697687	980955	631902	724162	579784	632392	842496	205259	829201	568482	197791	704259	653642	199684	800409	203822	624556	662123
M216T326	D-(+)-Glucosamine hydrochloride	216.16	326.4	215.056	4.05925	C6H14ClNO5	[M+H]+					66-84-2		BioDeepDB	1	pos	292645	280925	333891	300734	333917	275035	268774	343679	201064	299849	266417	139265	311771	314527	350153	352017	576409	597970	561230	598160	183476	214469	231339	179445
M216T49	Disodium beta-glycerophosphate	215.972	48.9	215.978	26.8553	C3H7Na2O6P	[M]+					154804-51-0		BioDeepDB	1	pos	110173	4754.05	64893.2	11775.9	1003.29	1235.05	1623.78	1274.99	4619.66	3581.26	1324.37	3138.83	3826.85	832.04	814.256	71839	9.30872e+06	2.59163e+06	5.09398e+06	1.44694e+06	336849	475724	224577	9056.94
M220T332	Pantothenic acid	220.206	332	219.111	4.19063	C9H17NO5	[M+H]+	Alcohols and polyols	Polyols	C00864	Metabolism of cofactors and vitamins; Metabolism of other amino acids; Global and overview maps; Digestive system	79-83-4 / 20938-62-9 / 137-08-6	HMDB0000210	BioDeepDB	1	pos	426434	289990	337126	306404	24519	36513.1	3570.3	10757.9	146679	113328	288775	132493	194772	127380	144380	130911	19104.7	114675	12478.5	15094.8	203676	110909	289938	5000.82
M240T101	Anserine	240.181	101	240.122	0.54443	C10H16N4O3	[M]+	Peptidomimetics	Hybrid peptides	C01262	Amino acid metabolism; Metabolism of other amino acids; Global and overview maps	584-85-0	HMDB0000194	BioDeepDB	1	pos	5.1642e+06	4.70615e+06	5.28141e+06	6.11364e+06	1.00447e+06	1.03948e+06	1.26343e+06	836573	1.19617e+06	1.36162e+06	1.56906e+06	1.16711e+06	225434	239440	135952	464535	6.58981e+06	6.94322e+06	6.01943e+06	5.65499e+06	1.61304e+06	1.79846e+06	1.62391e+06	1.80384e+06
M242T391	Equol	242.285	391.3	242.094	1.78315	C15H14O3	[M]+	Isoflavonoids	Isoflavans	C14131		531-95-3	HMDB0002209	BioDeepDB	1	pos	356979	297263	287840	233774	203493	181772	198203	152606	144059	127600	225585	131187	127677	123016	125878	214335	198383	205002	220789	205281	191796	261157	84477.4	149366
M227T45	Carnosine	226.953	44.7	226.107	5.60885	C9H14N4O3	[M+H]+	Peptidomimetics	Hybrid peptides	C00386	Amino acid metabolism; Metabolism of other amino acids; Global and overview maps	305-84-0	HMDB0000033	BioDeepDB	1	pos	1.3625e+06	234765	1.48e+06	1.11533e+06	1.36823e+06	1.5555e+06	868921	995289	1.0626e+06	1.47619e+06	931658	999544	375787	1.07259e+06	1.25476e+06	1.43384e+06	880299	1.41569e+06	1.4254e+06	1.11671e+06	807708	308747	111640	197266
M231T404	Butyrylcarnitine	231.251	404	231.147	0.544865	C11H21NO4	[M]+	Fatty Acyls	Fatty acid esters	C02862		25576-40-3	HMDB0002013	BioDeepDB	1	pos	6.2974e+06	3.66976e+06	4.43953e+06	5.37886e+06	3.66333e+06	6.0946e+06	5.36696e+06	3.80279e+06	4.81849e+06	4.26919e+06	3.60447e+06	3.80976e+06	1.1763e+06	6.62693e+06	3.59543e+06	5.25926e+06	3.93943e+06	4.02337e+06	3.95996e+06	6.1333e+06	6.46224e+06	5.48398e+06	4.48758e+06	4.69804e+06
M233T438	Melatonin	233.227	438.5	232.121	14.6629	C13H16N2O2	[M+H]+	Indoles and derivatives	Indoles	C01598	Environmental adaptation; Amino acid metabolism; Global and overview maps; Signaling molecules and interaction	73-31-4 / 8041-44-9	HMDB0001389	BioDeepDB	1	pos	927566	567618	818812	800772	869527	887345	674610	1.20452e+06	1.07237e+06	734447	1.29169e+06	989876	1.14468e+06	1.10793e+06	1.02621e+06	739894	678866	993183	1.32095e+06	971757	1.45859e+06	961485	892175	1.03923e+06
M254T570	Palmitoleic acid	254.249	570.5	254.225	5.7897	C16H30O2	[M]+	Fatty Acyls	Fatty acids and conjugates	C08362	Lipid metabolism	373-49-9	HMDB0003229	BioDeepDB	1	pos	1.50172e+07	1.21495e+07	1.48217e+07	8.51371e+06	7.51762e+06	9.07397e+06	2.77295e+06	7.79372e+06	1.55945e+07	1.46235e+07	1.4443e+07	1.55553e+07	4.08735e+06	4.54935e+06	892266	747561	1.07235e+07	1.17104e+07	1.07789e+07	9.4875e+06	7.95851e+06	7.83504e+06	204908	253528
M242T40_1	(+_-)-Potassium citramalate monohydrate	241.964	40.2	241.96	16.5314	C5H8K2O6	[M]+					1030365-02-6		BioDeepDB	1	pos	200540	113555	486534	500308	664493	636409	174390	520466	665611	471347	804762	550445	145546	604084	186600	473656	168966	102928	151820	141497	159483	128751	256596	165517
M251T591	DL-Homocystine	251.047	591.4	268.055	1.05956	C8H16N2O4S2	[M+H-H2O]+	Carboxylic acids and derivatives	Amino acids, peptides, and analogues	C01817	Amino acid metabolism	870-93-9 / 626-72-2 / 462-10-2	HMDB0000575	BioDeepDB	1	pos	1.8923e+06	1.32753e+06	1.80055e+06	1.31057e+06	1.82558e+06	1.11656e+06	2.14664e+06	999018	2.19153e+06	1.24263e+06	373481	1.66866e+06	1.03305e+06	1.12819e+06	2.16897e+06	1.46167e+06	1.27181e+06	417373	1.00703e+06	1.04416e+06	1.02385e+06	1.3769e+06	1.75594e+06	1.05474e+06
M277T68	6-Phosphogluconic acid	276.897	67.6	276.025	0.311593	C6H13O10P	[M+H]+	Organooxygen compounds	Carbohydrates and carbohydrate conjugates	C00345	Carbohydrate metabolism; Global and overview maps	921-62-0 / 53411-70-4	HMDB0001316	BioDeepDB	1	pos	8.87615e+06	1.01194e+07	9.6585e+06	1.04176e+07	1.0906e+07	1.50989e+07	8.56528e+06	1.3809e+07	8.95975e+06	6.85365e+06	1.01781e+07	1.59034e+07	1.31195e+07	1.41119e+07	1.57902e+07	1.29034e+07	1.59407e+07	1.38307e+07	1.3821e+07	7.20984e+06	1.54119e+07	1.1426e+07	1.55029e+07	1.44808e+07
M259T384	beta-D-glucosamine 6-sulfate	259.239	383.6	259.236	12.3438	C6H13NO8S	[M]+					91674-26-9 /		BioDeepDB	1	pos	362507	227021	391875	199903	439289	305963	597326	173134	892108	904554	662278	253339	236111	220337	237389	217267	491956	436920	219425	289176	257984	190268	210972	831703
M267T40_2	2'-Deoxyguanosine	266.938	40.4	267.097	2.33288	C10H13N5O4	[M]+			C00330		312693-72-4	HMDB0000085	BioDeepDB	1	pos	1.31408e+06	1.07869e+06	1.08778e+06	1.30885e+06	2.60153e+06	2.48754e+06	3.07234e+06	2.70818e+06	976019	1.55679e+06	1.39216e+06	1.0897e+06	1.23315e+06	1.4024e+06	1.30551e+06	1.44344e+06	4.05511e+06	4.04462e+06	4.64491e+06	4.58204e+06	2.91427e+06	2.82944e+06	2.86033e+06	2.85536e+06
M270T72	2'-Deoxyadenosine monohydrate	270.12	72.5	269.112	3.4207	C10H15N5O4	[M+H]+					16373-93-6		BioDeepDB	1	pos	178205	60973.1	332638	302393	198451	264184	445585	210255	71700	240636	64974.5	49854.8	221352	79050.1	190188	320588	1.10955e+06	285198	317634	448945	64068.2	201010	104135	195377
M286T556	Fisetin	286.274	555.9	286.048	0.79534	C15H10O6	[M]+			C10041		345909-34-4		BioDeepDB	1	pos	721711	647162	766028	738429	497219	568405	704600	430412	540203	608744	424240	551926	448358	474016	832862	673564	544367	1.0708e+06	564607	655246	532300	673893	360151	470652
M290T365	Ophthalmic acid	290.269	364.8	289.285	9.30291	C11H19N3O6	[M+H]+	Carboxylic acids and derivatives	Carboxylic acid derivatives			495-27-2	HMDB0005765	BioDeepDB	1	pos	2.1902e+06	1.74891e+06	4.57606e+06	2.69036e+06	2.81435e+06	4.17863e+06	5.61941e+06	3.23338e+06	2.92292e+06	3.1032e+06	3.18944e+06	4.12733e+06	5.46959e+06	6.22285e+06	6.14395e+06	4.80473e+06	3.12989e+06	1.05095e+07	2.1092e+06	2.58181e+06	1.97219e+06	2.9575e+06	3.53749e+06	5.7076e+06
M307T268	dCMP	307.207	267.9	307.057	0.901601	C9H14N3O7P	[M]+	Pyrimidine nucleotides	Pyrimidine deoxyribonucleotides	C00239	Global and overview maps; Nucleotide metabolism	1032-65-1	HMDB0001202	BioDeepDB	1	pos	2.13641e+06	1.76242e+06	1.4251e+06	752871	2.37006e+06	1.8892e+06	1.48276e+06	2.01215e+06	1.36057e+08	2.75983e+08	2.04902e+08	1.50475e+08	4.60302e+08	1.99169e+08	2.51053e+08	2.26976e+08	1.63861e+06	449265	5.0289e+06	1.64762e+06	5.25642e+06	3.75963e+06	3.26364e+06	3.17698e+06
M291T264	Androsterone	291.194	264.1	290.225	7.41274	C19H30O2	[M+H]+	Steroids and steroid derivatives	Androstane steroids	C00523	Lipid metabolism	53-41-8	HMDB0000031	BioDeepDB	1	pos	2.58348e+06	1.79131e+06	1.65455e+06	2.31553e+06	843204	937260	677662	1.10383e+06	2.2379e+06	2.70956e+06	2.66147e+06	2.2653e+06	76153.8	281038	242951	215592	3.2588e+06	4.12506e+06	2.26903e+06	1.96379e+06	559912	448801	365352	449965
M305T69	Sodium (2R,3R,4S)-2,3,4,6-tetrahydroxy-5-oxohexyl phosphate	304.892	69.4	303.994	4.18133	C6H11Na2O9P	[M+H]+					26177-86-6		BioDeepDB	1	pos	9.66116e+06	8.28688e+06	9.17806e+06	4.98812e+06	6.41283e+06	8.47096e+06	9.43194e+06	1.37316e+07	5.0328e+06	7.96088e+06	5.88406e+06	7.22229e+06	7.23867e+06	3.24146e+06	5.21934e+06	1.29734e+07	6.37107e+06	7.1936e+06	6.47596e+06	8.68734e+06	2.34831e+06	7.31993e+06	2.57309e+06	3.69325e+06
M227T569	NP-020401	227.128	569	226.121	0.506028	C12H18O4	[M+H]+	Endogenous Metabolites; Natural Products/Medicines						mzCloud	1	pos	2.14511e+07	2.1991e+07	2.18071e+07	2.63907e+07	2.44449e+07	2.13997e+07	2.5944e+07	2.52446e+07	2.55441e+07	2.69526e+07	1.4774e+07	2.34141e+07	2.25254e+07	1.47735e+07	2.33024e+07	2.34767e+07	2.55356e+07	2.85031e+07	2.47849e+07	2.1736e+07	2.08994e+07	3.23195e+07	2.25797e+07	2.01801e+07
M324T271_1	CMP	324.204	271.4	323.052	29.6661	C9H14N3O8P	[M+H]+	Pyrimidine nucleotides	Pyrimidine ribonucleotides	C00055	Global and overview maps; Nucleotide metabolism	63-37-6	HMDB0000095	BioDeepDB	1	pos	600899	430693	537946	586190	542558	584590	890322	291863	727457	461984	728598	479213	924926	558968	847908	463338	678743	366792	512648	453982	363665	687832	239744	565356
M329T474	Cyclic AMP	329.27	473.8	329.053	0.934537	C10H12N5O6P	[M]+	Purine nucleotides	Cyclic purine nucleotides	C00575	Neurodegenerative disease; Substance dependence; Cellular community - eukaryotes; Immune system; Excretory system; Development and regeneration; Cancer: overview; Drug resistance: antineoplastic; Signal transduction; Cell growth and death; Nervous system; Digestive system; Environmental adaptation; Infectious disease: bacterial; Aging; Infectious disease: parasitic; Infectious disease: viral; Cir…	60-92-4	HMDB0000058	BioDeepDB	1	pos	1.32609e+06	3.28007e+06	3.10118e+06	1.97891e+06	805648	675715	1.67376e+06	5.21185e+06	1.48614e+06	3.15281e+06	2.55637e+06	904605	4.14659e+06	801610	1.23623e+06	1.4518e+06	1.70178e+06	440727	1.85379e+06	1.31824e+06	5.32161e+06	847416	2.69415e+06	172822
M351T362	Cyclic AMP sodium	351.034	362.1	351.034	1.42436	C10H11N5NaO6P	[M]+					37839-81-9		BioDeepDB	1	pos	1.85438e+06	1.31955e+06	1.32634e+06	1.61915e+06	2.13527e+06	2.05584e+06	2.17293e+06	1.06339e+06	2.20488e+06	1.56311e+06	2.62082e+06	1.64826e+06	1.83578e+06	1.91268e+06	2.038e+06	1.2476e+06	2.28164e+06	1.21628e+06	2.04904e+06	1.77429e+06	1.43221e+06	1.31517e+06	769665	1.12956e+06
M338T426	Tricosanoic acid	337.599	426	354.61	11.4515	C23H46O2	[M+H-H2O]+	Fatty Acyls	Fatty acids and conjugates			2433-96-7	HMDB0001160	BioDeepDB	1	pos	3.92199e+06	3.97682e+06	3.87906e+06	2.74606e+06	3.12479e+06	1.44937e+06	88318.2	2.90504e+06	1.37779e+06	1.63835e+06	289989	1.21959e+06	2.92348e+06	1.23907e+06	1.58007e+06	2.7574e+06	2.62405e+06	348258	700981	1.86152e+06	1.84016e+06	2.96143e+06	693422	179211
M342T48	Alpha-Lactose	342.14	48.4	342.116	1.88846	C12H22O11	[M]+	Organooxygen compounds	Carbohydrates and carbohydrate conjugates	C00243	Carbohydrate metabolism; Membrane transport; Global and overview maps; Digestive system	63-42-3	HMDB0000186	BioDeepDB	1	pos	1.35566e+06	884671	1.30682e+06	1.40449e+06	1.00041e+06	1.23467e+06	1.47784e+06	1.01723e+06	1.57902e+06	1.53257e+06	1.62923e+06	1.55744e+06	1.08076e+06	923078	911422	924579	607283	468357	1.04633e+06	1.16965e+06	936384	588168	793681	378933
M346T298	Gibberellin A3	346.141	298	346.142	0.866698	C19H22O6	[M]+	Prenol lipids	Diterpenoids	C01699	Global and overview maps; Metabolism of terpenoids and polyketides	77-06-5	HMDB0003559	BioDeepDB	1	pos	670138	671427	647454	883597	574711	523630	813707	710719	527333	789081	578550	508115	332296	407776	447292	544982	863083	1.31611e+06	639744	823653	562918	496446	647520	1.06549e+06
M349T555	Nervonic acid	349.347	554.7	366.35	12.9785	C24H46O2	[M+H-H2O]+	Fatty Acyls	Fatty acids and conjugates	C08323	Lipid metabolism	506-37-6	HMDB0002368	BioDeepDB	1	pos	5.04722e+06	3.64591e+06	3.6358e+06	4.0428e+06	5.81657e+06	4.91353e+06	3.94558e+06	5.80361e+06	4.32273e+06	4.79323e+06	4.84943e+06	4.94212e+06	5.62659e+06	4.93655e+06	3.96828e+06	3.36632e+06	3.84149e+06	5.41096e+06	4.28555e+06	4.15071e+06	3.80198e+06	3.62807e+06	3.14016e+06	2.72774e+06
M355T614	Prostaglandin F2a	355.282	613.6	354.241	1.83575	C20H34O5	[M+H]+	Fatty Acyls	Eicosanoids	C00639	Nervous system; Signal transduction; Digestive system; Endocrine system; Lipid metabolism; Signaling molecules and interaction; Global and overview maps	551-11-1	HMDB0001139	BioDeepDB	1	pos	3.38264e+06	8.10146e+06	8.76031e+06	7.01485e+06	5.31209e+06	5.7486e+06	7.41944e+06	6.80045e+06	8.31911e+06	4.14205e+06	9.4692e+06	6.51793e+06	8.33315e+06	1.17561e+07	4.93285e+06	8.25808e+06	4.95465e+06	7.67929e+06	1.1871e+07	8.18638e+06	8.71442e+06	9.72679e+06	4.11591e+06	8.10783e+06
M376T458_1	Riboflavin	376.259	458.2	376.138	0.828042	C17H20N4O6	[M]+	Pteridines and derivatives	Alloxazines and isoalloxazines	C00255	Metabolism of cofactors and vitamins; Global and overview maps; Membrane transport; Digestive system	83-88-5	HMDB0000244	BioDeepDB	1	pos	5.03967e+07	7.4485e+07	5.83678e+07	7.07087e+07	5.12219e+07	7.29324e+07	7.30535e+07	6.61396e+07	8.55767e+07	8.28816e+07	9.03137e+07	8.63929e+07	7.99343e+07	7.86767e+07	6.96286e+07	7.10758e+07	7.63925e+07	1.06524e+08	8.60566e+07	9.76979e+07	1.36341e+08	8.21692e+07	7.41484e+07	6.71547e+07
M364T406	Xanthylic acid	364.333	405.8	364.042	25.2341	C10H13N4O9P	[M]+	Purine nucleotides	Purine ribonucleotides	C00655	Chemical structure transformation maps; Global and overview maps; Nucleotide metabolism	523-98-8	HMDB0001554	BioDeepDB	1	pos	410901	378456	337596	265217	164099	161529	311776	67360	203231	258067	397009	258655	527812	458770	385831	346929	244774	270332	193390	261403	693096	678732	625406	678968
M385T654	Desmosterol	385.293	654.1	384.339	6.65466	C27H44O	[M+H]+	Steroids and steroid derivatives	Cholestane steroids	C01802	Lipid metabolism; Global and overview maps	313-04-2	HMDB0002719	BioDeepDB	1	pos	1.57558e+07	1.67663e+07	1.54632e+07	1.42801e+07	8.31806e+06	4.1576e+06	7.63961e+06	5.47777e+06	992521	2.80171e+06	843417	1.74878e+06	834868	815015	815881	869816	5.5242e+06	7.28148e+06	5.49947e+06	4.70988e+06	3.03944e+06	3.43312e+06	1.35683e+06	2.30686e+06
M379T249_2	Barium(2+);[(2R,3R,4S,5S)-2,3,4,5-tetrahydroxy-6-oxohexyl] phosphate	378.912	248.7	395.919	2.20104	C6H11BaO9P	[M+H-H2O]+					104872-94-8		BioDeepDB	1	pos	892397	802415	1.1503e+06	810460	1.35393e+06	898609	618149	1.31091e+06	833688	1.02888e+06	1.03857e+06	1.79466e+06	1.13356e+06	910463	1.14303e+06	1.28503e+06	1.1946e+06	1.14618e+06	1.0798e+06	767942	775746	1.49777e+06	1.26576e+06	875871
M390T240	disodium 5'-guanylate	390.176	239.8	407.185	4.52616	C10H12N5Na2O8P	[M+H-H2O]+					5550-12-9 /		BioDeepDB	1	pos	155137	17958.4	28412.5	38432.6	45431.3	28774.2	162541	38067.5	57014.4	103634	150800	41321.3	149508	36211.6	153956	156059	42107.6	109190	35431	41063.1	116866	176000	23549.1	25450.5
M392T48	Adenosine 5'-phosphate disodium	392.04	48.2	391.027	13.93	C10H12N5O7P. 2Na	[M+H]+					4578-31-8		BioDeepDB	1	pos	89327.7	92139.7	83736.6	158063	302822	163103	83966.3	83491.2	130313	80358.7	222619	82375.2	101426	198775	212405	59552.4	108615	59338.9	98122.6	58768	63713.9	73217.8	58664.4	15953.1
M392T501_2	Ursodeoxycholic acid	392.313	501.5	392.293	0.316074	C24H40O4	[M-H2O+NH4]+	Steroids and steroid derivatives	Bile acids, alcohols and derivatives	C07880	Lipid metabolism	128-13-2	HMDB0000946	BioDeepDB	1	pos	1.52294e+06	1.12334e+06	1.33824e+06	1.55597e+06	2.05144e+06	2.58393e+06	3.39889e+06	1.9276e+06	2.68488e+06	2.33559e+06	1.97359e+06	1.36949e+06	2.15189e+06	2.23057e+06	2.25684e+06	2.47957e+06	1.85661e+06	1.20095e+06	2.41078e+06	3.07306e+06	2.95687e+06	3.52141e+06	2.25198e+06	2.70557e+06
M399T395	S-Adenosylmethionine	399.16	394.8	398.137	10.8623	C15H22N6O5S	[M+H]+	5'-deoxyribonucleosides	5'-deoxy-5'-thionucleosides	C00019	Biosynthesis of other secondary metabolites; Metabolism of terpenoids and polyketides; Amino acid metabolism; Folding, sorting and degradation; Chemical structure transformation maps; Global and overview maps	485-80-3 / 29908-03-0	HMDB0001185	BioDeepDB	1	pos	532775	393902	612544	628094	562054	723414	446972	576521	460900	452983	749847	573798	485070	500295	309022	454051	580348	307905	519610	394742	373221	495512	319411	407592
M399T274_3	sucralose	399.004	274.2	397.633	7.89159		[M+H]+					56038-13-2		BioDeepDB	1	pos	173141	163891	166363	271106	234375	317713	283955	130263	185802	201984	364408	118013	242237	216598	327887	122995	287931	125243	171924	144799	165332	227415	78469.5	203146
M416T475_2	2-[3-[(4-Amino-2-methylpyrimidin-5-yl)methyl]-4-methyl-1,3-thiazol-3-ium-5-yl]ethyl dihydrogen phosphate;chloride;dihydrate	416.228	475.4	416.069	0.65964	C12H22ClN4O6PS	[M]+					273724-21-3		BioDeepDB	1	pos	679240	1.07712e+06	804221	630679	708073	715947	688756	735707	1.16331e+06	1.0386e+06	1.41836e+06	909151	842866	852485	640211	1.00734e+06	825202	710036	1.26331e+06	972710	1.22668e+06	1.12915e+06	934434	330284
M425T544	Hyaluronic acid	425.382	544.4	425.385	6.34723	C16H27NO12	[M]+					9004-61-9		BioDeepDB	1	pos	3.06839e+06	2.59501e+06	2.59944e+06	2.78112e+06	1.53338e+06	1.54234e+06	1.52129e+06	2.03122e+06	1.67337e+06	1.71641e+06	1.42689e+06	997917	3.28192e+06	2.26041e+06	2.67443e+06	2.63693e+06	1.33526e+06	1.28719e+06	1.22423e+06	1.44862e+06	4.27304e+06	4.59483e+06	4.25232e+06	4.38307e+06
M410T438_2	Inosine 5'-monophosphate disodium salt hydrate	410.199	438.3	410.022	5.43486	C10H13N4Na2O9P	[M]+					352195-40-5		BioDeepDB	1	pos	1.46778e+06	1.09817e+06	746985	390779	614701	643209	491974	667655	513397	305096	193914	492004	461542	371755	323018	1.02296e+06	926946	624507	532547	604566	832470	1.05751e+06	852288	512570
M432T481	Genistin	432.237	481.4	432.106	2.53475	C21H20O10	[M]+	Isoflavonoids	Isoflavonoid O-glycosides	C09126	Biosynthesis of other secondary metabolites	529-59-9	HMDB0033988	BioDeepDB	1	pos	6.30217e+06	1.12875e+06	530582	5.24916e+06	5.19306e+06	1.70806e+06	6.26429e+06	8.54729e+06	5.01517e+06	2.69271e+06	2.99034e+06	1.85124e+06	9.04425e+06	6.42161e+06	3.32243e+06	7.96792e+06	6.3202e+06	2.36775e+06	1.39548e+06	3.40876e+06	1.44943e+06	2.6918e+06	3.8555e+06	3.979e+06
M428T406_1	Tetrahydrofolic acid	428.137	405.7	445.171	9.85825	C19H23N7O6	[M+H-H2O]+	Pteridines and derivatives	Pterins and derivatives	C00101	Metabolism of cofactors and vitamins; Drug resistance: antineoplastic; Translation; Amino acid metabolism; Energy metabolism; Global and overview maps	135-16-0	HMDB0001846	BioDeepDB	1	pos	27089.1	9722.86	43334.2	42226.3	39810.7	21422.7	23919	16208.7	10846.9	8579.39	17554.6	14737.5	9769.24	8408.29	36054.6	24746.4	12381.8	6542.36	25530.3	26650	22995.3	43739.6	12023.4	44763.4
M428T350_2	ADP	428.278	350	427.029	12.0191	C10H15N5O10P2	[M+H]+	Purine nucleotides	Purine ribonucleotides	C00008	Transport and catabolism; Signal transduction; Sensory system; Endocrine system; Environmental adaptation; Neurodegenerative disease; Signaling molecules and interaction; Metabolism of terpenoids and polyketides; Nucleotide metabolism; Energy metabolism; Immune system; Global and overview maps	58-64-0 / 20398-34-9	HMDB0001341	BioDeepDB	1	pos	244291	143423	176562	255669	238798	258010	161663	230809	247172	207181	327715	179122	239297	208456	83745.4	199389	212556	97620.4	220139	169042	131598	198545	137678	197311
M449T520_2	Astragalin	449.109	520.2	448.101	0.3442	C21H20O11	[M+H]+	Flavonoids	Flavonoid glycosides	C12249	Biosynthesis of other secondary metabolites; Global and overview maps	480-10-4	HMDB0037429	BioDeepDB	1	pos	458341	334603	376281	392212	489618	489148	514252	342121	484371	383971	449707	363775	380331	416899	364118	363389	336748	260262	426704	295492	351172	356465	205292	303788
M465T612	Glycocholic acid	465.378	612.2	465.309	5.27303	C26H43NO6	[M]+	Steroids and steroid derivatives	Bile acids, alcohols and derivatives	C01921	Lipid metabolism; Global and overview maps; Digestive system	475-31-0	HMDB0000138	BioDeepDB	1	pos	1.85086e+07	3.9905e+06	4.49767e+06	2.04588e+06	181464	59092.2	21881.2	1.84835e+06	1.77942e+06	1.28945e+06	1.11375e+06	498594	445786	303358	4.99227e+06	605949	2.94534e+06	3.82909e+07	1.08592e+06	3.57897e+06	1.68192e+06	4.5311e+06	1.83268e+06	2.65975e+07
M485T311_1	Uridine 5'-triphosphate tris salt	485.356	311.5	484.14	8.55157	C9H15N2O15P3	[M+H]+					108321-53-5		BioDeepDB	1	pos	3.00291e+06	2.29573e+06	2.9212e+06	1.54878e+06	688143	2.08987e+06	1.50421e+06	763358	1.50323e+06	1.54002e+06	955103	1.11371e+06	2.06859e+06	1.03682e+06	1.21422e+06	1.53742e+06	2.6088e+06	3.25534e+06	3.1359e+06	2.51233e+06	851922	1.08434e+06	1.27424e+06	2.36624e+06
M468T590_2	Deoxyuridine-5'-triphosphate	468.396	590.3	467.974	12.0664	C9H15N2O14P3	[M+H]+			C00460	Global and overview maps; Nucleotide metabolism	102814-08-4	HMDB0001191	BioDeepDB	1	pos	8.50339e+07	6.23665e+07	1.00538e+08	6.34353e+07	7.95098e+07	8.30215e+07	7.12327e+07	8.31078e+07	5.8638e+07	4.8874e+07	4.21186e+07	3.49256e+07	8.62772e+07	4.67078e+07	6.35501e+07	5.92801e+07	1.03849e+08	5.50178e+07	6.23962e+07	5.59184e+07	4.54713e+07	7.77939e+07	5.02627e+07	7.13314e+07
M480T593_1	(2S)-2-[[4-[(2-Amino-4-oxo-7,8-dihydro-3H-pteridin-6-yl)methylamino]benzoyl]amino]pentanedioic acid;dihydrate	480.148	593.2	479.176	17.5284	C19H25N7O8	[M+H]+					207226-40-2		BioDeepDB	1	pos	1.23328e+06	1.70457e+06	2.54403e+06	1.59597e+06	1.79005e+06	89610.1	24780.2	2.42291e+06	2.5916e+06	1.94439e+06	2.13461e+06	2.08135e+06	3.19412e+06	2.18148e+06	1.91552e+06	2.55328e+06	2.53971e+06	107785	1.0476e+06	1.50727e+06	1.07371e+06	86580.7	752984	19937.1
M500T680	5-Phospho-D-ribose 1-diphosphate pentasodium salt	500.329	680	499.98	12.1873	C5H13O14P3	[M]+					108321-05-7		BioDeepDB	1	pos	3.0827e+06	1.86487e+06	3.59378e+06	3.0193e+06	2.28247e+06	3.64485e+06	2.54428e+06	3.18651e+06	2.48209e+06	2.0286e+06	3.52546e+06	2.57176e+06	2.52523e+06	2.86368e+06	3.31175e+06	2.88639e+06	2.8688e+06	764479	3.28208e+06	2.42488e+06	1.93539e+06	2.7498e+06	1.91765e+06	2.45485e+06
M507T48	2'-Deoxyguanosine 5'-triphosphate sodium salt hydrate	507.18	48.3	507.18	0.591506	C10H16N5O13P3	[M]+					18423-40-0		BioDeepDB	1	pos	191572	8853.59	329873	19387.5	162204	580159	693578	4561.24	3825.63	530747	46562.6	691236	30989.4	7089.12	905508	445679	432191	11822.6	9830.57	449932	458960	619007	714633	220413
M540T582	Oleuropein	540.156	582	540.184	6.93485	C25H32O13	[M]+			C09794		32619-42-4		BioDeepDB	1	pos	570729	458777	357118	1.90585e+06	1.867e+06	1.12577e+06	1.33272e+06	300542	416221	388807	716118	315826	470579	506349	618472	1.00527e+06	614639	287292	350984	1.13791e+06	365896	468201	498635	1.54723e+06
M536T572_2	beta-Carotene	536.161	572.2	536.438	6.0026	C40H56	[M]+			C02094	Metabolism of cofactors and vitamins; Digestive system; Biosynthesis of other secondary metabolites; Metabolism of terpenoids and polyketides; Chemical structure transformation maps; Global and overview maps	7235-40-7		BioDeepDB	1	pos	2.04826e+07	2.84869e+07	2.41925e+07	1.98078e+07	1.67722e+07	3.03197e+07	4.5982e+07	1.90919e+08	1.11554e+08	6.804e+06	1.23716e+07	1.57408e+08	1.00582e+08	5.57144e+07	2.14983e+07	1.11606e+08	7.9794e+06	2.04217e+08	3.42735e+08	3.33e+08	1.43604e+08	1.51176e+07	4.14273e+07	1.35961e+08
M545T649_2	Protoporphyrin IX	545.411	649	562.258	17.8645	C34H34N4O4	[M+H-H2O]+	Tetrapyrroles and derivatives	Porphyrins	C02191	Metabolism of cofactors and vitamins; Global and overview maps	553-12-8	HMDB0000241	BioDeepDB	1	pos	5.43243e+06	2.26504e+06	874978	2.87452e+06	6.52443e+06	3.38105e+06	2.75032e+06	4.49515e+06	1.02108e+06	1.83117e+06	2.72697e+06	3.69924e+06	489541	482743	220463	330708	1.3748e+07	1.98479e+07	5.91436e+06	7.68351e+06	8.47615e+06	8.10462e+06	578723	1.27407e+06
M551T566	ATP disodium salt	551.353	566.5	550.96	0.018952	C10H14N5Na2O13P3	[M+H]+					34369-07-8		BioDeepDB	1	pos	953058	44153.9	64193.5	18051.6	388921	288574	182206	8746.91	139789	186517	201123	344725	217303	219630	131009	266058	897140	35529.2	1.52846e+06	1.02571e+06	214949	54961	5165.1	6061.95
M584T648_1	Bilirubin	584.467	647.5	584.264	10.5136	C33H36N4O6	[M]+			C00486	Metabolism of cofactors and vitamins; Global and overview maps; Digestive system	635-65-4		BioDeepDB	1	pos	2.38473e+06	4.82857e+06	5.12334e+06	2.4538e+06	4.57225e+06	4.79884e+06	3.18265e+06	6.49462e+06	4.26392e+06	3.3293e+06	4.62385e+06	7.19127e+06	4.30554e+06	4.13045e+06	1.72987e+06	5.65054e+06	1.72011e+06	1.46351e+06	2.3871e+06	4.27734e+06	7.34863e+06	1.78848e+06	1.15167e+06	1.38852e+06
M577T615_1	D-Raffinose Pentahydrate	577.386	614.8	594.222	10.7717	C18H42O21	[M+H-H2O]+					17629-30-0		BioDeepDB	1	pos	2.37413e+06	2.81654e+06	4.43691e+06	2.8189e+06	1.78366e+06	1.55007e+06	643309	1.72908e+06	7.47175e+06	8.16637e+06	6.06075e+06	6.40053e+06	585371	479972	456512	134096	569409	185802	735936	860545	101194	24452	225892	215257
M593T672	Uridine 5'-diphosphoglucose disodium salt hydrate fromSaccharomyces cerevisiae	593.265	672.3	610.27	4.43984	C15H24N2O17P2	[M+H-H2O]+					28053-08-9		BioDeepDB	1	pos	2.36875e+06	3.06658e+06	2.80674e+06	3.7851e+06	2.64256e+06	2.91885e+06	1.7954e+06	3.68995e+06	1.4199e+06	2.55715e+06	4.14663e+06	3.06642e+06	2.11622e+06	2.36061e+06	2.46792e+06	2.23185e+06	2.56155e+06	4.07716e+06	2.75226e+06	2.19616e+06	2.45008e+06	3.6291e+06	1.61771e+06	2.125e+06
M606T590	Guanosine 5'-diphosphoglucose sodium salt	606.349	589.6	605.34	2.5134	C16H25N5O16P2	[M+H]+					103301-72-0		BioDeepDB	1	pos	635900	33091.9	425727	8474.66	647759	89237.6	1.02938e+06	51181.4	281339	852052	67710.6	58435	20284.7	7507.6	26515.4	68073.6	577952	9229.53	225871	379632	8062.29	33377.1	400733	1.1051e+06
M609T280_1	UDP-a-D-Galactose disodium salt	609.385	279.8	610.019	4.76935	C15H22N2Na2O17P2	[M]+					137868-52-1		BioDeepDB	1	pos	327302	444084	501276	492585	170766	196512	66389	306991	432423	708528	424235	820238	58476.5	32867.8	38217.6	23835.9	8883.34	18934.4	23443.3	29432.1	4561.51	2655.07	701.115	1676.3
M625T444	CE(16_0)	624.575	443.7	624.585	15.8508	C43H76O2	[M]+	Steroids and steroid derivatives	Steroid esters	C11251		601-34-3	HMDB0000885	BioDeepDB	1	pos	2.40528e+06	921265	1.40483e+06	1.61212e+06	452156	223711	213527	405291	556708	318064	344021	116403	34174.8	61140	4238.84	22576.6	1.51408e+06	354669	1.65433e+06	1.41947e+06	103085	259418	11782.6	175607
M646T403_1	Trisodium;6-[[[5-(2,4-dioxopyrimidin-1-yl)-3,4-dihydroxyoxolan-2-yl]methoxy-oxidophosphoryl]oxy-oxidophosphoryl]oxy-3,4,5-trihydroxyoxane-2-carboxylate	645.974	403.4	645.98	9.13349	C15H19N2Na3O18P2	[M]+					63700-19-6		BioDeepDB	1	pos	9.70443e+07	2.81984e+07	2.14928e+07	2.28874e+07	2.98653e+07	4.74379e+07	9.66215e+06	9.15834e+06	9.03513e+06	41181.8	1.41595e+07	91216.6	3.9359e+06	3.51743e+06	4.29395e+06	1.78058e+06	9.78318e+06	1.00147e+07	8.04421e+06	9.47966e+06	8.98058e+06	8.41213e+06	9.44521e+06	9.03886e+06
M664T284_2	Nicotinamide hypoxanthine dinucleotide sodium salt	664.406	283.9	664.41	6.17093	C21H26N6O15P2	[M]+					104809-38-3		BioDeepDB	1	pos	1.71833e+07	4.48653e+06	1.18603e+07	777223	1.6476e+07	1.06131e+06	3.41111e+07	2.20628e+06	4.53945e+06	2.26353e+07	4.45833e+06	2.12257e+06	985066	470968	4.10856e+06	4.36705e+06	8.9708e+06	561876	544809	5.38653e+06	205506	1.56413e+06	1.34213e+07	2.51578e+07
M651T268_1	3,3',5'-Triiodo-L-thyronine	651.375	267.9	650.79	12.4804	C15H12I3NO4	[M+H]+			C07639	Endocrine system	5817-39-0		BioDeepDB	1	pos	21780.9	6606.28	17250.2	28660	21217.3	54428	26123.3	66031	55891.8	73247.3	25548	63237.4	18291.8	16969	65275.8	15702.1	98376.2	4838.96	73815.2	60573.5	63855.5	60886.6	12294.9	51277
M663T636	NAD	663.441	636	663.425	7.24103	C21H27N7O14P2	[M-H2O+NH4]+	Organooxygen compounds	Alcohols and polyols			53-84-9 /		BioDeepDB	1	pos	2.49682e+08	1.66222e+07	6.75379e+06	3.39953e+06	6.3963e+06	2.7702e+06	8.27405e+06	5.53578e+06	6.07149e+06	2.73729e+08	3.67284e+08	5.98368e+08	2.1698e+08	2.67317e+08	3.91631e+07	9.31799e+07	3.45033e+07	2.12152e+07	6.70634e+07	8.31114e+07	3.69468e+07	5.0836e+06	5.88566e+06	1.45054e+07
M777T580_2	Thyroxine	776.582	579.9	776.687	14.672	C15H11I4NO4	[M]+	Carboxylic acids and derivatives	Amino acids, peptides, and analogues	C01829	Digestive system; Endocrine system; Signaling molecules and interaction; Amino acid metabolism; Immune disease; Global and overview maps	51-48-9	HMDB0000248	BioDeepDB	1	pos	1.01378e+06	730502	858849	596887	1.06235e+06	1.02866e+06	894971	499762	930878	875880	586246	642620	804367	386884	357213	644601	741782	287997	685088	651791	335509	692799	262892	708004
M808T509_4	TG(16_0_16_0_16_0)	807.561	509.5	807.32	14.6407	C51H98O6	[M]+	Carboxylic acids and derivatives	Carboxylic acid derivatives			555-44-2	HMDB0005356	BioDeepDB	1	pos	1.11092e+06	2.3512e+06	2.52097e+06	2.84668e+06	922092	2.17034e+06	2.02584e+06	2.03686e+06	2.15801e+06	2.42055e+06	2.447e+06	2.50498e+06	812631	2.08122e+06	1.88004e+06	1.80403e+06	1.6899e+06	4.74842e+06	4.43897e+06	1.72381e+06	2.83807e+06	2.9798e+06	2.02976e+06	2.62354e+06
M813T610	Flavin adenine dinucleotide disodium	812.668	609.9	829.121	17.0394	C27H31N9Na2O15P2	[M+H-H2O]+					84366-81-4		BioDeepDB	1	pos	2.99632e+06	2.24518e+06	3.47763e+06	2.99513e+06	1.72951e+06	472098	2.10547e+06	1.4012e+06	1.89908e+06	1.43606e+06	1.12398e+06	1.05518e+06	2.07559e+06	1.00464e+06	637132	630093	2.10487e+07	2.31357e+07	2.22418e+07	3.31962e+07	5.90382e+06	6.60006e+06	4.98521e+06	6.86332e+06
M833T653_2	NADPH tetrasodium salt	833.252	652.8	833.019	12.9076	C21H26N7Na4O17P3	[M]+					2646-71-1		BioDeepDB	1	pos	1.07324e+07	2.34888e+06	3.50096e+06	2.5928e+06	2.25724e+06	1.81171e+06	5.96266e+06	4.96233e+06	1.06061e+07	2.49322e+07	8.55381e+06	5.67934e+07	5.05023e+07	2.68474e+07	7.60011e+07	4.33964e+07	6.52043e+07	6.59228e+07	6.98449e+07	2.91203e+07	3.53459e+07	5.5701e+07	1.14011e+07	3.04693e+06
M932T685_1	Angiotensin III	931.535	685.2	930.508	18.3399	C46H66N12O9	[M+H]+	Carboxylic acids and derivatives	Amino acids, peptides, and analogues	C15848	Endocrine system	12687-51-3	HMDB0001036	BioDeepDB	1	pos	1.06075e+07	4.29203e+06	1.01819e+07	5.6593e+06	8.52718e+06	9.59536e+06	5.68818e+06	1.04108e+07	2.91835e+06	3.78491e+06	4.20096e+06	1.60107e+06	2.50798e+06	1.22039e+06	357930	488665	5.2137e+06	8.64428e+06	9.35633e+06	1.36417e+07	503336	1.83129e+06	2.72871e+06	732802
M121T569	Acetophenone	121.064	569.1	120.058	3.10579	C8H8O	[M+H]+	Organooxygen compounds	Carbonyl compounds	C07113	Xenobiotics biodegradation and metabolism; Global and overview maps	98-86-2	HMDB0033910	BioDeepDB	1	pos	1.7461e+06	2.94214e+06	641458	647594	617327	2.45864e+06	1.6774e+06	1.46239e+06	1.31221e+06	586546	1.74449e+06	1.40628e+06	2.01114e+06	1.50502e+06	1.19036e+06	1.56423e+06	2.12487e+06	2.13718e+06	1.55711e+06	495749	1.36754e+06	479829	499090	519608
M103T112	Valeric acid	103.076	112.5	102.068	1.94032	C5H10O2	[M+H]+	Fatty Acyls	Fatty acids and conjugates	C00803		109-52-4	HMDB0000892	BioDeepDB	1	pos	197596	240931	208745	257135	228489	168300	26027.5	17414.8	54506.2	172846	330763	315076	135377	65786.1	185134	55003.5	258435	65310.8	65746.6	46897.6	174829	41172.2	6884.27	27222.8
M113T571	Citraconic acid	113.018	571.3	130.027	12.0866	C5H6O4	[M+H-H2O]+	Fatty Acyls	Fatty acids and conjugates	C02226	Carbohydrate metabolism; Amino acid metabolism; Global and overview maps	498-23-7	HMDB0000634	BioDeepDB	1	pos	2.27625e+07	2.2277e+07	2.57758e+07	2.45432e+07	2.57279e+07	2.4567e+07	2.92621e+07	2.76072e+07	2.76747e+07	2.4632e+07	3.17902e+07	2.7782e+07	3.16522e+07	3.14983e+07	2.74387e+07	2.57678e+07	2.46049e+07	2.4961e+07	3.02697e+07	3.29259e+07	3.50613e+07	3.06924e+07	2.65833e+07	1.38083e+07
M122T55	N,N-Dimethylaniline	122.097	54.6	121.089	2.45707	C8H11N	[M+H]+	Organonitrogen compounds	Amines	C02846		121-69-7	HMDB0001020	BioDeepDB	1	pos	553035	1.85919e+06	1.53133e+06	754565	645706	656573	570083	506673	541259	437274	1.45878e+06	594135	674444	1.5791e+06	683855	2.46542e+06	964620	1.05133e+06	1.2211e+06	659118	1.51645e+06	609717	520146	538528
M125T630	xi-Tetrahydro-6-propyl-2H-pyran-2-one	125.091	630.3	142.099	4.36235	C8H14O2	[M+H-H2O]+	Lactones	Delta valerolactones				HMDB0038310	BioDeepDB	1	pos	4.28912e+07	4.65178e+07	4.35001e+07	4.61741e+07	1.08144e+07	4.79845e+07	3.90524e+07	4.3229e+07	1.07158e+07	1.13357e+07	4.24855e+07	4.66562e+07	1.21332e+07	1.19996e+07	1.17944e+07	1.18141e+07	4.03825e+07	1.79087e+07	5.71947e+06	1.12156e+07	1.12131e+07	4.75158e+06	1.13508e+07	1.18447e+07
M125T568	1-Methylhistamine	125.092	568.3	125.095	25.1576	C6H11N3	[M+3ACN+2H]2+	Organonitrogen compounds	Amines	C05127	Amino acid metabolism; Global and overview maps	501-75-7	HMDB0000898	BioDeepDB	1	pos	4.08708e+06	4.31413e+06	3.94234e+06	2.73503e+06	4.06736e+06	4.20486e+06	3.87003e+06	4.16922e+06	1.62735e+06	4.32436e+06	4.22605e+06	1.92917e+06	1.63878e+06	245428	1.97139e+06	4.65238e+06	3.83043e+06	4.26532e+06	4.50065e+06	2.36552e+06	2.87412e+06	4.36245e+06	4.2619e+06	4.43985e+06
M126T34	Dimethyl trisulfide	125.963	34.2	125.963	1.58776	C2H6S3	[M]+	Organic trisulfides		C08372		3658-80-8	HMDB0013780	BioDeepDB	1	pos	1.42007e+06	1.28363e+06	2.35839e+06	1.58529e+06	1.64815e+06	1.57522e+06	791916	1.64426e+06	1.01853e+06	229373	1.19295e+06	2.0523e+06	1.66203e+06	1.20459e+06	2.97524e+06	1.55732e+06	2.04755e+06	1.14872e+06	1.39421e+06	368150	1.59843e+06	872317	147524	941025
M127T62_2	Methyl methanethiosulfonate	126.987	62.2	125.981	7.06225	C2H6O2S2	[M+H]+	Sulfonyls				2949-92-0	HMDB31832	BioDeepDB	1	pos	1.11902e+06	990889	1.56266e+06	1.73133e+06	1.50294e+06	1.06198e+06	1.15575e+06	908396	1.01346e+06	948321	2.09126e+06	1.13711e+06	1.08539e+06	747629	1.68363e+06	1.07392e+06	1.02238e+06	1.48924e+06	1.60691e+06	1.43491e+06	1.65279e+06	1.93998e+06	1.35896e+06	216468
M127T40_2	3-Vinyl-1,2-dithiacyclohex-4-ene	127.003	40.2	144.007	29.8604	C6H8S2	[M+H-H2O]+							BioDeepDB	1	pos	1.25126e+06	1.48916e+06	1.29109e+06	1.44747e+06	946173	1.16835e+06	1.12936e+06	1.19632e+06	1.00264e+06	906330	873843	1.61316e+06	2.09087e+06	1.63667e+06	2.05285e+06	2.09012e+06	1.10168e+06	1.92971e+06	1.39207e+06	1.00676e+06	1.99711e+06	2.0554e+06	1.65046e+06	2.05356e+06
M130T338	Agmatine	130.123	338	130.122	9.22204	C5H14N4	[M]+	Organonitrogen compounds	Guanidines	C00179	Amino acid metabolism; Global and overview maps	306-60-5	HMDB0001432	BioDeepDB	1	pos	889652	927177	865091	779500	898610	607881	330015	292996	313760	924414	1.40221e+06	284911	1.00934e+06	175373	974582	212487	741957	861209	777874	735901	1.21875e+06	363514	310179	401345
M137T287	4-Propylphenol	137.096	287.4	136.089	2.91765	C9H12O	[M+H]+	Benzene and substituted derivatives	Phenylpropanes	C14311		645-56-7	HMDB0032625	BioDeepDB	1	pos	216108	210153	251099	350838	458040	425179	531126	464057	214353	330748	318712	220781	312291	225459	285436	256312	824129	619926	824614	929536	508429	505830	525213	588052
M142T559	Pelletierine	142.123	559.2	141.115	2.27972	C8H15NO	[M+H]+	Piperidines		C06182	Chemical structure transformation maps; Biosynthesis of other secondary metabolites; Global and overview maps	539-00-4/4396-01-4	HMDB0030325	BioDeepDB	1	pos	1.41218e+06	52934.5	1.74242e+06	2.92008e+06	1.51219e+06	1.09969e+06	707063	721878	2.39137e+06	631605	58122.6	1.02356e+06	3.62268e+06	1.48505e+06	3.40689e+06	4.25726e+06	488887	6.18879e+06	764767	1.06111e+06	1.05668e+06	893130	5.66041e+06	934994
M143T61	5-(2-Hydroxyethyl)-4-methylthiazole	143.04	61.2	143.041	4.19463	C6H9NOS	[M]+	Azoles	Thiazoles	C04294	Metabolism of cofactors and vitamins; Global and overview maps	137-00-8	HMDB0032985	BioDeepDB	1	pos	8.03489e+06	5.39862e+06	9.36714e+06	9.12643e+06	7.79021e+06	7.91631e+06	7.97946e+06	1.00307e+07	8.19756e+06	8.90135e+06	7.9791e+06	8.76787e+06	7.59359e+06	6.98793e+06	6.67465e+06	8.23965e+06	7.92177e+06	9.15962e+06	8.74217e+06	8.42747e+06	8.92904e+06	7.14603e+06	6.10652e+06	8.03129e+06
M145T330	Caprylic acid	145.123	330.3	144.115	3.44536	C8H16O2	[M+H]+	Fatty Acyls	Fatty acids and conjugates	C06423	Lipid metabolism; Metabolism of cofactors and vitamins; Chemical structure transformation maps; Global and overview maps	124-07-2	HMDB0000482	BioDeepDB	1	pos	664544	652684	646855	630924	678266	673434	659451	672826	666743	693823	692933	700662	712396	707693	700550	673952	680358	668373	669942	664873	682224	674646	668652	681685
M151T410	2-Methoxy-4-vinylphenol	151.076	409.8	150.068	1.98576	C9H10O2	[M+H]+	Phenols	Methoxyphenols	C17883		7786-61-0	HMDB0013744	BioDeepDB	1	pos	350183	203252	272520	74417.2	367402	976103	235724	343392	235809	408653	447201	439393	259765	395769	541428	381216	297172	68572.4	250063	273610	363455	274345	65010	243312
M152T559	N-Methyltyramine	152.107	559.4	151.1	3.28715	C9H13NO	[M+H]+	Benzene and substituted derivatives	Phenethylamines	C02442	Amino acid metabolism; Global and overview maps	370-98-9	HMDB0003633	BioDeepDB	1	pos	119478	40168.2	713933	480898	1.34948e+06	1.8988e+06	934950	672863	1.19061e+06	1.26341e+06	935431	813888	812650	783071	934558	1.53116e+06	619472	1.53876e+06	1.3443e+06	419530	756933	668270	1.55278e+06	605939
M169T63	2-Amino-3-phosphonopropionic acid	169.014	62.7	169.014	2.36667	C3H8NO5P	[M]+	Carboxylic acids and derivatives	Amino acids, peptides, and analogues	C05672	Metabolism of other amino acids; Global and overview maps	5652-28-8/20263-06-3	HMDB0000370	BioDeepDB	1	pos	2.27696e+06	2.08911e+06	2.06731e+06	1.88232e+06	3.51859e+06	2.02542e+06	3.61901e+06	2.38574e+06	3.19252e+06	4.57263e+06	3.58045e+06	2.84645e+06	3.87832e+06	2.02553e+06	3.49764e+06	3.2484e+06	4.29393e+06	4.22597e+06	3.16037e+06	3.06728e+06	3.20085e+06	2.29335e+06	2.45893e+06	2.91325e+06
M155T309	2,6-Dimethoxyphenol	155.071	309.4	154.063	3.22433	C8H10O3	[M+H]+	Phenols	Methoxyphenols	C10787		91-10-1	HMDB0034158	BioDeepDB	1	pos	342446	304771	308878	324524	313738	338438	354784	305525	364018	306164	439159	321893	372551	265954	347689	349259	296239	261921	343415	338398	318387	367687	237381	288733
M164T53	TMPD (hydrochloride)	164.127	53.3	164.131	28.9321	C10H16N2	[M]+					637-01-4		BioDeepDB	1	pos	71278.7	130122	121207	138559	170586	144708	109157	159484	135868	125127	137709	34093.5	170958	122905	122895	118117	91151.1	114665	109634	118203	130654	131653	139603	88022.2
M167T503	3,4-Dihydroxymandelic acid	167.034	503.1	184.037	0.598679	C8H8O5	[M+H-H2O]+	Phenols	Benzenediols	C05580	Amino acid metabolism; Global and overview maps	775-01-9	HMDB0001866	BioDeepDB	1	pos	432470	430785	767120	736308	713303	383218	739053	532508	469023	493726	618726	735492	719462	421465	1.1966e+06	760234	760217	1.14049e+06	1.12337e+06	1.24095e+06	1.65109e+06	1.38792e+06	509983	364859
M185T527	6-hydroxy Chlorzoxazone	184.988	526.8	184.988	2.32065	C7H4ClNO3	[M]+					1750-45-4		BioDeepDB	1	pos	6.78902e+07	5.01194e+07	4.92871e+07	4.85367e+07	5.52706e+07	5.34437e+07	5.5572e+07	5.66536e+07	5.95363e+07	5.33283e+07	9.613e+07	1.01511e+08	4.94807e+07	1.07614e+08	5.22741e+07	1.02245e+08	5.52939e+07	9.4117e+07	5.97956e+07	3.26149e+07	5.28409e+07	6.10688e+07	5.37817e+07	5.71835e+07
M170T418	Lupinine	170.154	418.5	169.147	2.49185	C10H19NO	[M+H]+			C10773	Chemical structure transformation maps; Biosynthesis of other secondary metabolites; Global and overview maps	486-70-4		BioDeepDB	1	pos	522307	631756	46281.4	388718	292922	160138	15988.7	485539	323833	99382.9	283601	335634	889333	489962	319831	139584	667610	112493	112533	299535	106665	109882	230777	35494.1
M171T559	L-Targinine	171.121	559.5	188.127	9.54877	C7H16N4O2	[M+H-H2O]+	Carboxylic acids and derivatives	Amino acids, peptides, and analogues	C03884		17035-90-4/NA	HMDB0029416	BioDeepDB	1	pos	1.20571e+06	937082	559596	950395	748147	981378	679507	624871	269021	586839	398473	450591	346375	430851	368674	483335	756272	525644	686810	731946	939537	823696	966953	936948
M191T162	CLOPIDOL	190.99	162.1	190.99	0.161244	C7H7Cl2NO	[M]+					2971-90-6		BioDeepDB	1	pos	1.15308e+06	734099	753914	707192	265630	1.1898e+06	908698	1.07479e+06	946714	2.18303e+06	442307	736374	714574	737034	730273	2.60722e+06	801373	976707	4.1871e+06	755553	2.17504e+06	720837	732138	714264
M178T342	Cysteinylglycine	178.036	342.2	178.041	29.2076	C5H10N2O3S	[M]+	Carboxylic acids and derivatives	Amino acids, peptides, and analogues	C01419	Metabolism of other amino acids; Global and overview maps	19246-18-5	HMDB0000078	BioDeepDB	1	pos	162831	171078	187763	172208	189950	177385	191127	166617	179033	150867	167777	146552	200666	135662	169618	128094	159787	176181	159075	177364	174564	208300	215305	203754
M197T384	Geranyl acetate	197.154	384	196.146	1.52165	C12H20O2	[M+H]+	Fatty Acyls	Fatty alcohol esters	C09861		105-87-3	HMDB0035157	BioDeepDB	1	pos	1.03216e+06	724914	548758	889055	1.1536e+06	564784	632065	1.58671e+06	1.01849e+06	690313	2.01089e+06	1.08822e+06	996683	1.02812e+06	1.94064e+06	413505	728510	1.34143e+06	1.49172e+06	955480	1.27648e+06	924649	573478	2.18589e+06
M180T365	Metanephrine	180.097	365.1	197.105	3.14275	C10H15NO3	[M+H-H2O]+	Phenols	Methoxyphenols	C05588	Amino acid metabolism; Global and overview maps	5001-33-2	HMDB0004063	BioDeepDB	1	pos	318841	91158.1	112293	85751.4	81720.7	153438	106285	75626.7	95360.4	101940	504965	235227	95906.7	183817	75479.2	93264.7	187945	113618	163485	241723	245137	94070.1	90615.7	62321.1
M183T33	2,3-dihydrothieno-Thiadiazole Carboxylate	182.962	33.3	199.971	11.3945	C6H4N2O2S2	[M+H-H2O]+							BioDeepDB	1	pos	2.0766e+06	2.19911e+06	2.24395e+06	2.3322e+06	2.31933e+06	2.17829e+06	2.72391e+06	4.86474e+06	5.89022e+06	2.17225e+06	5.10274e+06	6.00597e+06	2.12751e+06	2.11939e+06	2.07857e+06	1.99907e+06	4.52169e+06	5.06283e+06	4.79661e+06	4.71375e+06	8.47861e+06	5.02657e+06	6.92935e+06	3.95796e+06
M185T547	Phosphorylcholine	185.081	547.2	184.074	0.669976	C5H15NO4P	[M+H]+	Organonitrogen compounds	Quaternary ammonium salts	C00588	Lipid metabolism; Cancer: overview; Global and overview maps	3616-04-4/107-73-3	HMDB0001565	BioDeepDB	1	pos	299954	194359	320505	452585	486344	454448	118000	323736	443032	199323	324004	440632	443641	392773	299992	337166	354878	133804	464831	490800	355775	315079	117124	205128
M184T334	p-Fluorophenylalanine	184.082	333.8	183.07	26.2058	C9H10FNO2	[M+H]+			C11217		51-65-0		BioDeepDB	1	pos	3.7312e+06	3.19574e+06	3.52365e+06	4.05964e+06	923202	877737	963159	838182	1.04761e+06	1.12986e+06	1.20229e+06	1.04062e+06	200706	206228	218424	835851	2.6996e+06	2.63156e+06	2.35759e+06	2.62492e+06	1.35739e+06	1.4249e+06	1.29928e+06	1.32645e+06
M187T342	Levamisole	187.065	341.8	204.072	2.32005	C11H12N2S	[M+H-H2O]+	Imidazothiazoles		C07070		14769-73-4	HMDB0014986	BioDeepDB	1	pos	681632	561588	557264	662570	603624	642592	549166	552454	877272	544978	531495	820627	660253	558949	1.06365e+06	571047	535840	508913	584457	523689	614830	780580	833622	793919
M190T50	5-Bromoisoquinoline	189.96	50.5	206.968	6.4608	C9H6BrN	[M+H-H2O]+					34784-04-8		BioDeepDB	1	pos	70772.7	26024.3	153167	48461.5	226746	801142	193903	140503	718766	788984	657530	496494	167794	141689	614743	738908	499420	925913	893127	953940	652983	108635	103789	104265
M195T66	Zonisamide	195.013	66.5	212.026	27.0033	C8H8N2O3S	[M+H-H2O]+	Benzisoxazoles		C07504		68291-97-4	HMDB0015045	BioDeepDB	1	pos	873668	767680	418849	433471	339373	824694	725181	432148	683222	442059	401457	329859	965699	830877	579713	433222	498102	413702	447645	1.04521e+06	408130	402473	472718	648203
M196T41_2	CHLOROXINE	195.969	40.6	212.975	6.19926	C9H5Cl2NO	[M+H-H2O]+					773-76-2		BioDeepDB	1	pos	371155	411484	416856	1.17889e+06	400805	388495	1.23386e+06	794551	381159	1.20469e+06	404864	384204	1.26584e+06	876467	1.1924e+06	1.21727e+06	755894	710289	984169	363978	486768	1.1546e+06	1.08738e+06	382035
M196T33	Carmustine	195.995	32.8	213.007	22.276	C5H9Cl2N3O2	[M+H-H2O]+	Organic carbonic acids and derivatives	Ureas	C06873		154-93-8	HMDB0014407	BioDeepDB	1	pos	3.78696e+06	2.41909e+06	3.93361e+06	1.9682e+06	2.08653e+06	2.67776e+06	1.68057e+06	1.98532e+06	1.55976e+06	1.64298e+06	1.55664e+06	2.59423e+06	1.40705e+06	1.75651e+06	2.31506e+06	1.59191e+06	2.17319e+06	1.24821e+06	1.47766e+06	1.66215e+06	3.92783e+06	3.22211e+06	3.64424e+06	3.68792e+06
M196T101	N-Heptanoylhomoserine lactone	196.127	100.9	213.137	11.5537	C11H19NO3	[M+H-H2O]+			C11844	Cellular community - prokaryotes	177158-20-2		BioDeepDB	1	pos	422245	529911	597382	810680	1.12098e+06	315622	1.68535e+06	707726	515626	311122	446038	738340	1.67449e+06	904275	2.36825e+06	1.19427e+06	508869	776042	663631	440652	792858	1.22722e+06	447299	491097
M198T502	Tacrine	198.121	502.2	198.116	28.7702	C13H14N2	[M]+	Quinolines and derivatives	Benzoquinolines	C01453		321-64-2	HMDB0014526	BioDeepDB	1	pos	422688	327699	223067	417431	253908	347303	390193	196038	334755	312201	382264	482362	190834	405954	180986	259657	382475	420874	199555	304566	330805	342351	165643	343503
M198T358	Guanethidine	198.186	357.6	198.184	7.06408	C10H22N4	[M]+	Organonitrogen compounds	Guanidines	C07036		645-43-2/55-65-2	HMDB0015301	BioDeepDB	1	pos	276103	308122	282841	319992	243212	437161	337572	340399	319141	333469	338539	288273	302282	393088	255751	341230	350073	58294.1	300671	238312	322396	267863	264237	314014
M199T48	O-Phosphothreonine	199.025	48.3	199.025	2.51225	C4H10NO6P	[M]+	Carboxylic acids and derivatives	Amino acids, peptides, and analogues	C12147	Metabolism of cofactors and vitamins	1114-81-4	HMDB0011185	BioDeepDB	1	pos	5.12212e+06	4.84854e+06	4.52608e+06	4.57638e+06	5.12298e+06	3.19459e+06	3.33357e+06	3.45084e+06	5.40875e+06	5.3883e+06	6.49508e+06	4.23144e+06	2.9755e+06	4.2181e+06	3.76395e+06	6.06374e+06	1.19415e+07	1.26806e+07	1.26462e+07	9.72799e+06	1.26261e+07	7.2818e+06	2.51678e+06	3.65385e+06
M199T337	Cadalene	199.153	336.8	198.141	24.9729	C15H18	[M+H]+							BioDeepDB	1	pos	223262	99283	229675	218692	223322	226096	220431	213663	218738	230496	224174	227241	237244	217776	238947	227485	225482	242749	241020	245349	242487	249509	182574	240304
M200T487	Diethylcarbamazine	200.173	486.9	199.168	14.4875	C10H21N3O	[M+H]+	Diazinanes	Piperazines	C07968		90-89-1	HMDB0014849	BioDeepDB	1	pos	977550	908523	1.11267e+06	928185	975919	1.0597e+06	1.0913e+06	1.07986e+06	1.31705e+06	1.33274e+06	1.31448e+06	1.1656e+06	1.13403e+06	1.15243e+06	1.13124e+06	985866	1.43256e+06	1.51443e+06	1.32626e+06	1.35612e+06	1.24479e+06	1.08215e+06	1.11821e+06	1.11835e+06
M201T570	Cysteine-S-sulfate	200.976	570.4	200.977	2.48786	C3H7NO5S2	[M]+	Carboxylic acids and derivatives	Amino acids, peptides, and analogues	C05824	Amino acid metabolism; Global and overview maps	1637-71-4	HMDB0000731	BioDeepDB	1	pos	2.25332e+07	1.6131e+06	1.77079e+07	8.71749e+06	9.1828e+06	8.07499e+06	7.97867e+06	1.1281e+07	5.7091e+06	4.97137e+06	1.1518e+07	5.40318e+06	1.03491e+07	9.63061e+06	5.61002e+06	4.44459e+06	1.08654e+07	1.29181e+07	1.46548e+07	2.27553e+07	1.74538e+07	1.98253e+07	1.56348e+07	1.73214e+07
M201T355_1	Ethyl-L-NIO	201.149	355.4	201.148	5.33502	C9H19N3O2	[M]+					150403-97-7		BioDeepDB	1	pos	212733	263573	238298	210933	203042	212313	226941	201337	408845	276004	300083	663793	1.76412e+06	3.14274e+06	290333	500868	241135	213021	199138	286792	216194	225110	156868	274813
M204T53_2	Zingiberene	204.188	53.4	204.188	0.489745	C15H24	[M]+	Prenol lipids	Sesquiterpenoids	C09750		495-60-3	HMDB0036164	BioDeepDB	1	pos	2.007e+07	1.97141e+07	1.94088e+07	2.02327e+07	8.25472e+06	8.7438e+06	8.22788e+06	9.43154e+06	9.76602e+06	9.99446e+06	1.10439e+07	1.03156e+07	3.39229e+06	3.4929e+06	3.8949e+06	4.11101e+06	1.00769e+07	1.01918e+07	1.21203e+07	8.23001e+06	4.24561e+06	3.87745e+06	3.8222e+06	2.85896e+06
M205T409	Diethylpropion	205.144	409.1	205.147	15.1114	C13H19NO	[M]+	Organooxygen compounds	Carbonyl compounds	C06954		134-80-5/90-84-6	HMDB0015072	BioDeepDB	1	pos	1.2932e+06	1.35268e+06	1.08348e+06	1.13669e+06	1.14759e+06	1.01579e+06	304968	1.28752e+06	297393	997592	1.40941e+06	1.20393e+06	1.16747e+06	1.09402e+06	1.20256e+06	898312	1.22352e+06	1.28281e+06	1.74509e+06	214357	1.43954e+06	1.09067e+06	1.10792e+06	1.52742e+06
M224T71	Cerulenin	224.129	71.2	223.121	1.78469	C12H17NO3	[M+H]+	Epoxides	Oxirane carboxylic acids and derivatives	C12058		17397-89-6	HMDB0015168	BioDeepDB	1	pos	1.21155e+07	1.72513e+07	1.62265e+07	4.08099e+06	1.40913e+07	3.0054e+06	5.14307e+06	1.81512e+07	2.36396e+07	4.32804e+06	4.13796e+06	5.50373e+06	1.82766e+07	4.53934e+06	2.41903e+07	7.33233e+06	5.84899e+06	5.94728e+06	1.34232e+07	5.64339e+06	1.34339e+07	6.78901e+06	6.24603e+06	5.75875e+06
M208T305	Prometon	208.156	305	225.159	22.7425	C10H19N5O	[M+H-H2O]+			C14186		1610-18-0		BioDeepDB	1	pos	48714.4	9881	31691	6103.4	50012.7	216097	25110.5	10843.9	25470.5	66861.2	72540.2	78736.5	33102.1	65259.7	35650.7	54186.8	26769	2000.52	34985.3	38176.3	56297.8	34096.4	1749.71	28361.9
M209T551	Dihydrolipoate	209.07	550.6	208.059	15.899	C8H16O2S2	[M+H]+	Fatty Acyls	Fatty acids and conjugates	C02147	Metabolism of cofactors and vitamins; Global and overview maps	462-20-4	HMDB0012210	BioDeepDB	1	pos	3.89634e+06	917148	3.91244e+06	843489	742748	872653	908741	728193	1.00202e+06	958678	839681	798896	785025	758730	768538	645247	761989	737204	793841	1.07559e+06	2.97304e+06	2.88115e+06	3.06358e+06	3.80382e+06
M210T528	3,4-DMMA	210.149	527.9	209.142	1.90341	C12H19NO2	[M+H]+							BioDeepDB	1	pos	382678	269614	568269	377677	1.35934e+06	964340	875332	555682	782966	796015	600691	831248	466857	507633	644829	1.35348e+06	664214	843198	849352	348500	603409	454555	887990	367939
M216T265	6-Aminopenicillanic acid	216.06	265.3	216.057	15.7363	C8H12N2O3S	[M]+	Carboxylic acids and derivatives	Amino acids, peptides, and analogues	C02954	Chronology: Antiinfectives; Biosynthesis of other secondary metabolites	551-16-6	HMDB0060618	BioDeepDB	1	pos	658395	634336	643565	555190	308783	318450	353580	329894	399381	416829	454731	367512	156522	172604	182820	170712	1.24534e+06	1.20636e+06	1.36042e+06	1.29227e+06	856797	889079	677873	773940
M217T303	Methoxsalen	217.053	303.1	216.042	16.6964	C12H8O4	[M+H]+	Coumarins and derivatives	Furanocoumarins	C01864		298-81-7	HMDB0014693	BioDeepDB	1	pos	620986	598982	1.10792e+06	856380	1.2205e+06	1.03877e+06	1.43892e+06	727020	895608	1.36249e+06	1.16036e+06	1.18563e+06	630633	745030	1.05058e+06	1.19135e+06	966069	1.34518e+06	1.45848e+06	619816	1.19536e+06	735019	1.46199e+06	525158
M217T383	Lidocaine	217.164	382.5	234.173	8.59259	C14H22N2O	[M+H-H2O]+	Benzene and substituted derivatives	Xylenes	C07073	Xenobiotics biodegradation and metabolism	137-58-6	HMDB0014426	BioDeepDB	1	pos	1.32169e+06	1.07407e+06	1.26345e+06	1.18559e+06	180625	207967	265862	150869	255149	252010	279703	231495	46265.7	40123.4	28558.5	94204.1	1.28746e+06	1.54804e+06	1.41454e+06	1.17822e+06	407986	365193	295588	360029
M221T48_3	DIPYROCETYL	221.04	48.4	238.048	0.434129	C11H10O6	[M+H-H2O]+					486-79-3		BioDeepDB	1	pos	641914	802512	848046	753919	799541	788264	783422	951897	934635	543525	898893	759649	773476	979996	801258	712205	738877	647555	943179	986778	816814	910959	680213	849583
M224T448	Mefenamic acid	224.1	448	241.11	11.8965	C15H15NO2	[M+H-H2O]+	Benzene and substituted derivatives	Benzoic acids and derivatives	C02168		61-68-7	HMDB0014922	BioDeepDB	1	pos	181218	159048	174378	164225	158474	202944	184985	159010	183234	191176	181435	182899	219336	171121	196911	304931	183355	249468	107047	322751	326998	266401	171719	56906.9
M224T241	Neostigmine	224.157	241.1	223.145	23.7512	C12H19N2O2	[M+H]+	Benzene and substituted derivatives	Phenoxy compounds	C07258		59-99-4	HMDB0015472	BioDeepDB	1	pos	541885	403218	965046	927853	1.05751e+06	637382	924560	968078	898864	682166	1.27477e+06	957462	980999	667151	2.43268e+06	1.04783e+06	1.18211e+06	1.69217e+06	1.48973e+06	1.92533e+06	2.24066e+06	2.4848e+06	479432	512605
M225T593	Clofibrate	225.061	593.2	242.071	10.957	C12H15ClO3	[M+H-H2O]+	Benzene and substituted derivatives	Phenoxyacetic acid derivatives	C06916		637-07-0	HMDB0014774	BioDeepDB	1	pos	226384	194045	254862	226043	174099	187152	199726	197237	46375.3	141074	141531	141664	86887.8	124507	78227.6	90139	230358	292755	288806	268426	330729	347978	296127	294838
M230T361	Ergothioneine	230.097	360.7	230.096	2.6076	C9H16N3O2S	[M]+	Carboxylic acids and derivatives	Amino acids, peptides, and analogues	C05570	Amino acid metabolism; Global and overview maps	497-30-3/58511-63-0	HMDB0003045	BioDeepDB	1	pos	240114	104097	545807	260836	574807	112703	381323	405949	247945	112119	821276	104146	180875	328100	259003	109845	155977	106313	111001	110705	131599	179455	117121	104675
M231T57	Guanabenz	231.019	56.5	230.013	1.62757	C8H8Cl2N4	[M+H]+	Benzene and substituted derivatives	Halobenzenes	C07034		5051-62-7	HMDB0014767	BioDeepDB	1	pos	892565	707937	899968	753237	704995	734605	635697	510106	1.04751e+06	836884	635049	692336	649698	835095	816254	574518	629149	553758	791412	655770	641304	1.04734e+06	787827	756081
M231T599	Pyrimethamine	231.079	599	248.083	13.5625	C12H13ClN4	[M+H-H2O]+	Diazines	Pyrimidines and pyrimidine derivatives	C07391		58-14-0	HMDB0014350	BioDeepDB	1	pos	1.53923e+06	1.13347e+06	898837	1.13068e+06	124007	1.58062e+06	1.59725e+06	684052	1.66689e+06	1.06628e+06	1.10022e+06	998861	1.42636e+06	971778	1.11737e+06	1.09737e+06	1.96153e+06	1.40754e+06	2.15895e+06	2.19487e+06	765228	733390	160064	165199
M233T340	Sulfadiazine	233.048	340.2	250.052	14.7351	C10H10N4O2S	[M+H-H2O]+	Benzene and substituted derivatives	Benzenesulfonamides	C07658		68-35-9	HMDB0014503	BioDeepDB	1	pos	94184.8	595153	154601	183438	83042.7	499684	637462	125608	2.26194e+06	1.31716e+06	1.75467e+06	2.01815e+06	1.07581e+06	913039	1.28923e+06	1.32988e+06	850490	478120	1.16508e+06	987371	1.28547e+06	1.27856e+06	1.43167e+06	923174
M236T543	Neopterin	236.075	543.2	253.081	3.53278	C9H11N5O4	[M+H-H2O]+	Pteridines and derivatives	Pterins and derivatives	C05926	Metabolism of cofactors and vitamins	2009-64-5	HMDB0000845	BioDeepDB	1	pos	77394.6	86958.8	208408	79687.7	128664	17746	78981.6	85929	79753.4	84935.5	63027.7	75750.7	86815.5	64226.1	57448.6	67931.3	160687	69261.7	86657.4	69744.3	62801.4	153996	87114.1	66325.1
M253T72	Proguanil	253.113	72.3	253.109	12.2475	C11H16ClN5	[M]+	Organonitrogen compounds	Guanidines	C07631		500-92-5	HMDB0015263	BioDeepDB	1	pos	4.33827e+06	4.18895e+06	3.78685e+06	3.41664e+06	2.21543e+06	2.04367e+06	2.98674e+06	2.3014e+06	425609	425347	4.67926e+06	410755	386807	352447	418289	331929	351675	3.74743e+06	279229	208858	365325	337387	328055	362731
M238T51	Propyzamide	238.014	50.8	255.022	1.95787	C12H11Cl2NO	[M+H-H2O]+			C14333		23950-58-5		BioDeepDB	1	pos	5.75331e+06	4.49839e+06	4.09867e+06	6.62464e+06	5.59367e+06	5.13867e+06	2.49233e+06	3.02393e+06	5.24878e+06	5.76033e+06	4.9857e+06	6.54708e+06	7.16572e+06	5.94668e+06	5.54393e+06	8.85695e+06	6.42869e+06	232247	4.81444e+06	1.65257e+06	7.7126e+06	8.48531e+06	8.3219e+06	3.07843e+06
M241T41	6,7-DICHLORO-3-HYDROXY-2-QUINOXALINECARBOXYLIC ACID	240.954	40.9	257.96	5.54734	C9H4Cl2N2O3	[M+H-H2O]+							BioDeepDB	1	pos	829298	993874	934511	1.25036e+06	1.09009e+06	1.09461e+06	1.0193e+06	936399	920789	1.09203e+06	1.14659e+06	1.27512e+06	1.14405e+06	969146	866310	1.08549e+06	1.31834e+06	1.06678e+06	847968	1.08669e+06	1.05375e+06	1.06685e+06	1.11279e+06	1.0952e+06
M243T396	Carisoprodol	243.16	395.8	260.174	25.7691	C12H24N2O4	[M+H-H2O]+	Carboxylic acids and derivatives	Amino acids, peptides, and analogues	C07927		78-44-4	HMDB0014539	BioDeepDB	1	pos	13592.2	6932.51	13431.8	23034.5	230295	276613	322346	249955	26607.3	28756	44624.1	32668.6	763900	998833	699247	684769	8105.84	52182.8	10352.5	7515.46	6486.09	11181.6	3356.79	11174.9
M243T116	Oxymetazoline	243.183	115.6	260.189	6.30801	C16H24N2O	[M+H-H2O]+	Benzene and substituted derivatives	Xylenes	C07363		1491-59-4	HMDB0015070	BioDeepDB	1	pos	4.95321e+07	7.38502e+07	4.93148e+07	6.27471e+07	6.45136e+07	7.85991e+07	1.84621e+08	1.54463e+08	6.62505e+07	6.45536e+07	5.01338e+07	7.64526e+07	7.51263e+07	7.37155e+07	6.70205e+07	9.26269e+07	3.77324e+07	1.11055e+08	1.01473e+08	9.48103e+07	8.2793e+07	5.35651e+07	5.43759e+07	5.86567e+07
M245T355	Farnesyl acetone	245.223	355.1	262.23	3.54134	C18H30O	[M+H-H2O]+							BioDeepDB	1	pos	393253	307621	403505	291166	549242	399713	414687	176845	415640	536608	525109	546578	417571	339810	564102	613154	378233	566202	594112	210287	453971	369844	369809	278141
M248T685	Mirtazapine	248.148	685.2	265.158	10.7436	C17H19N3	[M+H-H2O]+	Piperazinoazepines		C07570		61337-67-5/85650-52-8	HMDB0014514	BioDeepDB	1	pos	424942	2.00404e+06	781214	777920	818412	716787	709068	1.26646e+06	731175	504607	593822	618459	616182	672503	941957	565099	740255	1.47372e+06	708851	647818	376915	1.28893e+06	548714	860761
M251T436	2-DPMP	251.166	436.4	251.167	7.12916	C18H21N	[M]+					519-74-4		BioDeepDB	1	pos	684170	575228	298953	440554	310180	142124	179318	288784	227943	546001	247563	294311	171674	407722	206183	5.13932e+06	7.6772e+06	1.85431e+07	8.14521e+07	1.06208e+07	1.12319e+07	7.07442e+06	7.74362e+06	1.19861e+07
M252T463	N-Acetyl-L-tyrosine	252.123	462.7	251.116	0.0951916	C13H17NO4	[M+H]+	Carboxylic acids and derivatives	Amino acids, peptides, and analogues	C01657		537-55-3/840-97-1	HMDB0000866	BioDeepDB	1	pos	1.10156e+06	1.32309e+06	1.13338e+06	1.35172e+06	393156	367201	444883	591645	1.28891e+06	1.11025e+06	1.50503e+06	981790	268016	452402	306579	444246	2.58883e+06	2.37397e+06	3.34161e+06	3.74584e+06	4.05807e+06	3.49914e+06	2.74426e+06	2.0154e+06
M254T167	Midodrine	254.126	167.5	254.127	3.54155	C12H18N2O4	[M]+	Benzene and substituted derivatives	Methoxybenzenes	C07890		133163-28-7/42794-76-3/3092-17-9	HMDB0014356	BioDeepDB	1	pos	344548	270867	300943	361152	311959	317608	359361	377971	357079	328774	363115	330752	175642	357798	383378	336392	361491	351442	437589	364286	429705	349702	352656	355832
M258T40_2	Ebselen	257.977	40.2	274.985	0.765184	C13H9NOSe	[M+H-H2O]+					60940-34-3		BioDeepDB	1	pos	5.05682e+06	5.52796e+06	5.89332e+06	5.54179e+06	5.60734e+06	5.84665e+06	6.49361e+06	6.56798e+06	5.3321e+06	4.09337e+06	8.69765e+06	4.83945e+06	5.75849e+06	6.6142e+06	4.91775e+06	6.16277e+06	4.47678e+06	6.24014e+06	5.98982e+06	4.93825e+06	6.86087e+06	4.90265e+06	5.5288e+06	6.7357e+06
M259T40_2	5-IAI	258.979	40	258.986	26.6151	C9H10IN	[M]+							BioDeepDB	1	pos	46166.3	46353.8	34553.7	26159.3	63064.3	45851.7	48920.9	23137	243201	37372.7	318205	31681.7	212597	55626.1	188638	17070.1	95233.1	283213	283833	519924	339320	80015.6	38952.7	276138
M259T343	Yangonin	259.1	342.6	258.089	14.6661	C15H14O4	[M+H]+	Kavalactones		C09980	Chemical structure transformation maps	500-62-9	HMDB0034144	BioDeepDB	1	pos	19606.9	21368.3	68695.7	23739.2	132031	168680	249387	197320	7913.47	1335.33	3121.74	2898.85	125649	186626	139544	175259	258823	58439.3	316141	202725	111298	107030	53990.1	84694
M259T542	Primaquine	259.171	541.6	259.168	7.71693	C15H21N3O	[M]+	Quinolines and derivatives	Aminoquinolines and derivatives	C07627		90-34-6	HMDB0015219	BioDeepDB	1	pos	1.76076e+06	1.32254e+06	1.58081e+06	959944	927648	1.90562e+06	836769	884049	958492	985357	1.17966e+06	1.15236e+06	1.76615e+06	970807	1.03835e+06	970510	1.06756e+06	949419	997855	1.15672e+06	958486	808367	950567	1.56175e+06
M259T416	3-Androstanol	259.247	416.5	276.245	16.2008	C19H32O	[M+H-H2O]+			C15638		7657-50-3/NA		BioDeepDB	1	pos	158901	4.42601e+06	163144	173890	195751	414676	48389.5	187115	113725	101018	220263	100280	122295	79745.5	85867.1	91479.6	135628	76362.7	197062	175402	82750.6	78930.2	4852.98	6379.47
M262T239	QX-314	262.201	239.1	262.205	12.6371	C16H26N2O	[M]+					24003-58-5		BioDeepDB	1	pos	663790	450214	609370	358252	226763	523899	377865	214185	203956	467898	188122	188050	159407	168810	214946	183393	187477	288658	240701	180655	177073	194907	195489	147562
M280T312	Imipramine	280.191	312	280.194	9.27937	C19H24N2	[M]+	Benzazepines	Dibenzazepines	C07049		50-49-7	HMDB0001848	BioDeepDB	1	pos	890882	251875	922469	1.64133e+06	898142	864899	1.63671e+06	836407	205908	521873	1.14258e+06	204201	1.0165e+06	179357	1.16545e+06	119516	175955	184120	184956	169694	467990	172093	924354	710286
M268T372	Pentazocine	268.206	371.9	285.209	16.9049	C19H27NO	[M+H-H2O]+	6,7-benzomorphans	2,6-dimethyl-3-benzazocines	C07421		359-83-1	HMDB0014790	BioDeepDB	1	pos	195550	204584	213641	197916	208900	274400	190313	199345	202486	246812	210599	235640	204433	201773	203924	195461	202215	216032	199530	209450	198309	225889	109837	212445
M269T479	Alachlor	269.117	478.7	269.118	4.08744	C14H20ClNO2	[M]+	Benzene and substituted derivatives	Anilides	C10928		15972-60-8	HMDB0031766	BioDeepDB	1	pos	1.33895e+06	1.08406e+06	754222	430651	458455	829473	1.00669e+06	642639	79070.3	614343	634629	84416.1	285432	316161	546505	335680	2.95128e+06	1.803e+06	1.19231e+06	1.13617e+06	614696	460785	1.10204e+06	363633
M287T578	Procyclidine	287.222	578.4	287.225	10.7931	C19H29NO	[M]+	Organonitrogen compounds	Amines	C07378		77-37-2	HMDB0014531	BioDeepDB	1	pos	578252	25484.1	235565	109924	33891.9	261370	362477	1.05088e+06	370491	362764	331785	225148	410266	526250	715769	219153	658671	329409	731693	713226	336676	294451	470560	1.64934e+06
M272T312	Sotalol	272.113	312.1	272.12	24.6221	C12H20N2O3S	[M]+	Benzene and substituted derivatives	Sulfanilides	C07309		3930-20-9	HMDB0014632	BioDeepDB	1	pos	2.41959e+06	3.15416e+06	2.40574e+06	2.04373e+06	2.52427e+06	3.0821e+06	3.09647e+06	3.20567e+06	2.46171e+06	2.54455e+06	2.9714e+06	3.6911e+06	2.26791e+06	2.70368e+06	3.30314e+06	3.16076e+06	3.34736e+06	3.65687e+06	2.32392e+06	2.53061e+06	3.53803e+06	2.8058e+06	2.87023e+06	2.50377e+06
M277T402	PERHEXILINE	277.283	401.7	277.277	23.261	C19H35N	[M]+					6724-53-4		BioDeepDB	1	pos	147227	212209	222965	227337	296299	194225	181915	366236	203804	127566	217275	253778	160063	121215	191175	143972	215636	192098	245932	180077	130452	139237	101900	110942
M280T48	3-amino-4-hydroxyphenyl sulfone	280.052	47.8	280.052	0.785568	C12H12N2O4S	[M]+					7545-50-8		BioDeepDB	1	pos	6.2097e+06	6.19288e+06	6.20422e+06	4.17265e+06	5.11387e+06	5.1812e+06	4.55863e+06	4.45923e+06	5.18398e+06	4.39379e+06	5.35561e+06	4.93714e+06	2.26775e+06	4.59753e+06	5.75079e+06	4.46298e+06	5.29012e+06	4.775e+06	4.46665e+06	7.01352e+06	9.84886e+06	6.96443e+06	4.57347e+06	4.23064e+06
M299T593_1	8-Anilino-1-naphthalene sulfonate	299.062	593.3	299.062	2.67503	C16H13NO3S	[M]+	Naphthalenes	Naphthalene sulfonic acids and derivatives	C11326		82-76-8	HMDB0061854	BioDeepDB	1	pos	4.2861e+06	4.73907e+06	4.49118e+06	3.72605e+06	527106	316345	314643	457189	6.28752e+06	7.29556e+06	1.1875e+07	4.66441e+06	74269.4	78612.9	77027.5	58607.1	9.36373e+06	9.39324e+06	9.23276e+06	1.00344e+07	2.94358e+06	983155	2.45587e+06	3.13762e+06
M282T73	2'-O-Methyladenosine	282.12	72.7		1.06338	C11H16N5O7P(C5H8O6PR)n(C5H8O6PR)n	[M+H]+	Purine nucleosides		C04779		2140-79-6	HMDB0004326	BioDeepDB	1	pos	321205	360421	329790	324315	458131	465740	497658	399351	364099	321756	117054	355340	585099	323198	299625	333434	495581	561988	479783	436624	374224	378780	323643	324823
M285T271	CAY10435	285.193	271.2	302.199	3.52713	C18H26N2O2	[M+H-H2O]+					288862-73-7		BioDeepDB	1	pos	3.47054e+06	2.07936e+06	3.83025e+06	1.95403e+06	3.35145e+06	3.54033e+06	2.41138e+06	1.75244e+06	1.90096e+06	2.28361e+06	2.50037e+06	2.36875e+06	1.85618e+06	1.75807e+06	2.28676e+06	3.87128e+06	2.27824e+06	2.93906e+06	2.32113e+06	2.16634e+06	1.92276e+06	4.17746e+06	1.60146e+06	2.95298e+06
M303T472	Phenoxybenzamine	303.134	471.9	303.139	16.4944	C18H22ClNO	[M]+	Benzene and substituted derivatives	Phenylmethylamines	C07435		59-96-1	HMDB0015061	BioDeepDB	1	pos	739418	550734	704149	811571	917848	1.29734e+06	1.64699e+06	640887	630316	972910	860375	545038	291658	1.17737e+06	1.6609e+06	1.40327e+06	1.08783e+06	922830	679269	1.29859e+06	479943	600296	970376	584509
M286T648	Palmitoyl Ethanolamide-d4	286.301	648.1	303.308	3.1351	C18H33D4NO2	[M+H-H2O]+					1159908-45-8		BioDeepDB	1	pos	647671	567331	466404	287909	689087	393642	962423	360474	484443	886130	346514	497020	501054	297527	337123	455704	443211	396103	215589	497555	117685	374710	292974	759553
M304T440_2	Palmitoyl Ethanolamide-d5	304.312	439.7	304.314	7.27269	C18H32D5NO2	[M]+							BioDeepDB	1	pos	1.05353e+06	1.1012e+06	912602	1.11117e+06	1.03985e+06	1.10674e+06	1.28706e+06	1.0679e+06	2.45634e+06	2.53288e+06	2.46073e+06	2.46996e+06	1.85394e+06	2.59659e+06	2.22275e+06	2.5963e+06	3.20255e+06	889153	920967	3.23936e+06	692180	2.29394e+06	2.15344e+06	2.0687e+06
M289T238_3	W123	289.19	237.9	306.194	8.96053	C17H26N2O3	[M+H-H2O]+							BioDeepDB	1	pos	300791	63594	57979	34117.2	37989.3	396339	38828.6	19913.9	55342.3	27392.7	253219	226416	278957	205543	47880.7	280659	213216	54931.5	234612	66685.8	230459	207164	22480	44289.4
M290T362	Eicosapentaenoic Acid-d5	290.251	361.6	307.256	7.47652	C20H25D5O2	[M+H-H2O]+					1197205-73-4		BioDeepDB	1	pos	735893	658069	798425	740114	598517	690257	727291	584190	694110	561484	670421	784178	765203	777312	694293	789268	852540	861192	745168	850703	786506	768703	354294	759363
M291T49	Norsertraline	291.054	48.5	291.058	13.9318	C16H15Cl2N	[M]+					918933-19-4		BioDeepDB	1	pos	600671	493800	522018	509383	133863	260738	249828	240174	190157	470819	433711	464732	117227	300853	272668	296357	249249	113929	325602	385146	404849	390151	90983	85974
M292T500	Methadone	292.197	500	309.209	17.6799	C21H27NO	[M+H-H2O]+	Benzene and substituted derivatives	Diphenylmethanes	C07163	Xenobiotics biodegradation and metabolism	76-99-3	HMDB0014477	BioDeepDB	1	pos	531969	466261	614549	458250	439214	321540	386013	415274	308312	411471	407011	397893	299651	320548	320998	268107	904481	806559	496080	411450	282634	266733	226865	266241
M293T40	CAY10526	292.925	40.2	309.93	8.21567	C12H7BrO3S	[M+H-H2O]+							BioDeepDB	1	pos	100156	79433.4	98108.1	101891	106283	99176.4	133717	78983.8	145296	93397.2	127679	92004.6	154308	86013.9	129376	68191.5	145759	84605.3	89907.9	91034.7	68928.5	93861.9	47113.3	110412
M294T49	5-HYDROXY DICLOFENAC	294.003	48.8	311.012	2.60078	C14H11Cl2NO3	[M+H-H2O]+					69002-84-2		BioDeepDB	1	pos	193241	118641	158298	88379.7	262704	241966	366099	169202	319963	176696	188230	238238	398135	276890	200928	250389	228419	110541	312151	305138	244360	157945	73944	174511
M312T312	Dhurrin	312.106	312	311.101	5.36997	C14H17NO7	[M+H]+	Organooxygen compounds	Carbohydrates and carbohydrate conjugates	C05143	Metabolism of other amino acids; Global and overview maps	499-20-7	HMDB0060471	BioDeepDB	1	pos	598995	264605	265677	72214.7	28361.2	14779.1	17766.7	29193.3	603751	1.38582e+06	1.09778e+06	302328	3073.8	3797.29	8446.52	2028.65	479680	707591	1.32075e+06	2.985e+06	328095	349101	292727	300985
M297T640_1	Albendazole sulfone	297.082	640	297.078	13.8009	C12H15N3O4S	[M]+	Benzimidazoles	2-benzimidazolylcarbamic acid esters	C16626		75184-71-3	HMDB0060561	BioDeepDB	1	pos	2.83536e+06	3.09266e+06	2.67623e+06	2.89979e+06	2.93764e+06	2.75224e+06	2.84266e+06	2.91208e+06	2.49671e+06	3.08042e+06	2.13151e+06	3.08002e+06	2.97073e+06	2.36449e+06	4.59904e+06	3.56228e+06	2.77969e+06	2.6004e+06	2.77474e+06	2.63752e+06	2.55666e+06	2.51485e+06	2.61232e+06	2.45522e+06
M300T388	Piplartine	300.114	388.5	317.126	16.8803	C17H19NO5	[M+H-H2O]+	Cinnamic acids and derivatives		C10166		20069-09-4	HMDB0030341	BioDeepDB	1	pos	339346	19282.9	15435.9	17173.4	23129	23981.1	92999.9	18503.7	399829	56017.4	27361.6	319106	306456	40554.5	69050.9	21099.3	78910.2	17185.4	43409.5	310438	45412	12208.3	151404	16355.6
M304T34	Chlorpyrifos-methyl	303.887	33.6	320.895	1.53346	C7H7Cl3NO3PS	[M+H-H2O]+			C14520		5598-13-0		BioDeepDB	1	pos	8.27206e+06	7.88959e+06	6.39639e+06	7.9382e+06	2.19042e+06	7.50664e+06	366475	1.82286e+06	5.24304e+06	4.03854e+06	7.17752e+06	5.61907e+06	2.48463e+06	6.29143e+06	5.04849e+06	6.26706e+06	1.92059e+06	5.65466e+06	5.62198e+06	6.69715e+06	8.10606e+06	6.24606e+06	8.46203e+06	437117
M306T249	BUTACAINE	306.228	249.2	306.231	10.5418	C18H30N2O2	[M]+					149-15-5		BioDeepDB	1	pos	23933.1	4333.82	18443.1	20706	30349.9	34928.1	14197.1	20077	20551.1	16663.9	26457.6	24519	14405.3	15114.6	29468.5	19691.6	18162.4	9286.94	22746	14669.9	14989.4	15843.5	10897.9	2627.06
M325T573	Tolterodine	325.238	572.6	325.241	7.37921	C22H31NO	[M]+	Benzene and substituted derivatives	Diphenylmethanes	C07750		124937-51-5	HMDB0015170	BioDeepDB	1	pos	313338	364595	684475	304583	796367	750955	833004	664165	694495	7.30776e+06	817542	873494	347636	784707	652445	3.85988e+06	737716	1.11853e+07	8.74427e+06	679885	382681	336055	354419	306173
M309T586	Ajmaline	309.197	585.7	326.199	14.6638	C20H26N2O2	[M+H-H2O]+	Ajmaline-sarpagine alkaloids		C06542	Biosynthesis of other secondary metabolites; Global and overview maps	4360-12-7	HMDB0015495	BioDeepDB	1	pos	103024	3.26488e+07	129332	92426.9	106594	84998.1	101527	574384	455115	288505	335045	73272	71370.6	65518	67587.6	57283.7	116807	472610	130744	287464	99076.1	90715.6	64236.1	102099
M310T304	N-Acetyl-a-neuraminic acid	310.115	304.3	309.106	4.51446	C11H19NO9	[M+H]+	Organooxygen compounds	Carbohydrates and carbohydrate conjugates	C19909		21646-00-4	HMDB0000773	BioDeepDB	1	pos	244842	243341	55327.9	159858	364576	395540	343227	220432	200530	69587.4	130951	79941.2	242433	72832.2	67337.9	50796.7	217375	63199.2	67149.6	277332	69103.1	270911	187420	51277.9
M311T603	11Z-Eicosenoic acid	311.295	602.7	310.287	2.24867	C20H38O2	[M+H]+	Fatty Acyls	Fatty acids and conjugates	C16526	Lipid metabolism	26764-41-0/5561-99-9	HMDB0002231	BioDeepDB	1	pos	2.395e+06	3.46695e+06	2.69273e+06	3.17187e+06	3.50256e+06	2.67255e+06	2.10714e+06	3.87582e+06	2.41791e+06	2.16924e+06	2.21261e+06	1.32463e+06	2.52619e+06	2.29833e+06	1.98541e+06	2.16095e+06	2.1941e+06	2.3659e+06	2.56285e+06	2.56239e+06	3.27582e+06	2.63997e+06	3.80195e+06	3.05225e+06
M344T555	Paroxetine	344.165	554.6	329.143	2.75387	C19H20FNO3	[M+H]+	Piperidines	Phenylpiperidines	C07415		61869-08-7	HMDB0014853	GNPS	1	pos	128400	98777.2	212586	301702	183945	186053	84481.9	97549.9	98077	34670.8	158284	47168.9	107225	113976	234597	147708	213754	18209.3	182816	39350.5	91385.7	256363	48110.1	203349
M313T499	homo-Tienilic Alcohol	312.977	499.2	329.988	13.3759	C14H12Cl2O3S	[M+H-H2O]+					236735-89-0		BioDeepDB	1	pos	284114	226994	225932	86162.1	343598	318260	300488	195063	173033	185883	414134	312855	212748	248099	202509	282034	348202	123579	260593	296793	249804	276402	145933	218395
M331T458_2	Ethyl icosapentate	331.264	458.3	330.256	1.2075	C22H34O2	[M+H]+	Fatty Acyls	Fatty acid esters	C16184		86227-47-6/NA	HMDB0039530	BioDeepDB	1	pos	2.23616e+06	2.54579e+06	2.28177e+06	2.33028e+06	2.33555e+06	2.02396e+06	3.12999e+06	1.60595e+06	1.61603e+06	2.22617e+06	1.69622e+06	628151	1.80341e+06	1.9929e+06	3.21254e+06	2.43918e+06	1.65066e+06	4.55351e+06	1.53476e+06	2.9443e+06	1.8452e+06	2.11126e+06	1.58609e+06	2.11153e+06
M331T451	Geranylacetone	331.304	450.7	330.292	13.0515	C23H38O	[M+H]+	Prenol lipids	Monoterpenoids	C13297		3796-70-1/6809-52-5	HMDB0031846	BioDeepDB	1	pos	804118	957349	669687	602618	1.60102e+06	1.47006e+06	729160	1.16682e+06	635652	859389	858316	789807	1.00002e+06	2.0093e+06	927463	891641	1.3482e+06	1.43884e+06	1.55592e+06	1.27328e+06	1.50356e+06	1.00192e+06	1.63502e+06	2.06424e+06
M339T580	Disopyramide	339.232	579.6	339.231	2.35827	C21H29N3O	[M]+	Pyridines and derivatives	Pheniramines	C06965		3737-09-5	HMDB0014425	BioDeepDB	1	pos	1.01161e+07	6.37522e+06	6.00367e+06	7.15821e+06	2.83651e+06	4.35883e+06	3.25422e+06	2.30877e+06	7.055e+06	7.61323e+06	1.0999e+07	2.92561e+06	2.4018e+06	1.56792e+06	1.35838e+06	1.44214e+06	3.85396e+06	9.95757e+06	5.20006e+06	4.91395e+06	1.41392e+06	1.8939e+06	1.38655e+06	3.73282e+06
M325T584	21-hydroxy-heneicosanoic acid	325.31	584.2	342.313	14.0045	C21H42O3	[M+H-H2O]+							BioDeepDB	1	pos	2.54396e+06	1.89476e+06	1.76587e+06	1.42672e+06	2.20212e+06	1.76195e+06	1.33748e+06	2.14093e+06	2.24473e+06	1.09526e+06	780802	1.12831e+06	1.51212e+06	1.36715e+06	1.26438e+06	1.80656e+06	2.09169e+06	4.91519e+06	2.13051e+06	1.62091e+06	3.20605e+06	2.67281e+06	1.30853e+06	4.32885e+06
M327T575	Oxyphencyclimine	327.196	574.6	344.21	20.3731	C20H28N2O3	[M+H-H2O]+	Diazines	Pyrimidines and pyrimidine derivatives	C07851		125-53-1/125-52-0	HMDB0014527	BioDeepDB	1	pos	3.29951e+06	2.7485e+06	777205	3.31659e+06	705078	4.59611e+06	2.80096e+06	2.09227e+06	2.02917e+06	1.3813e+06	3.0028e+06	901131	540410	389162	2.47518e+06	3.07949e+06	4.12126e+06	1.84759e+06	6.01588e+06	4.8021e+06	2.77196e+06	1.71863e+06	643504	4.78304e+06
M328T428	Methotrimeprazine	328.161	428	328.161	0.609458	C19H24N2OS	[M]+	Benzothiazines	Phenothiazines	C07192		60-99-1	HMDB0015474	BioDeepDB	1	pos	124922	234621	128246	268363	106593	243300	119192	257843	287659	221819	289936	129105	326614	271088	137934	190834	251445	248188	376106	214261	212880	366953	277043	241984
M330T453	Furosemide	330.008	452.7	330.008	1.81814	C12H11ClN2O5S	[M]+	Benzene and substituted derivatives	Benzenesulfonamides	C07017		54-31-9	HMDB0001933	BioDeepDB	1	pos	312358	295047	314207	184352	113752	286236	280686	187284	293030	138544	176225	266897	178932	160547	173066	148414	176371	176215	176320	327518	163581	160339	291626	345343
M330T576	CLOPERASTINE	330.163	576	329.155	3.27696	C20H24ClNO	[M+H]+					3703-76-2		BioDeepDB	1	pos	245669	295288	180468	1.12032e+06	477264	1.80648e+06	541164	1.61919e+06	1.8613e+06	234557	1.35177e+06	994476	354010	211618	1.27336e+06	168850	361845	48406.9	1.19321e+06	329517	273663	340522	208515	241406
M331T525	Phenazepam	330.95	524.5	347.967	28.9147	C15H10BrClN2O	[M+H-H2O]+					51753-57-2		BioDeepDB	1	pos	47773.4	34298.6	84947.7	139219	53823.8	60046.6	37663.6	123303	11296.2	47272.5	21536.8	55083	9866.25	38526.9	91387.9	52448.7	73929.6	23423.1	52853.6	41977.7	8239.54	109633	55194.7	22139.4
M332T57	Chlorpyrifos	331.917	57.5	348.926	6.52573	C9H11Cl3NO3PS	[M+H-H2O]+	Organic thiophosphoric acids and derivatives	Thiophosphoric acid esters	C14322		2921-88-2	HMDB0041856	BioDeepDB	1	pos	208405	281277	152225	143702	26124.8	707590	928665	1.7316e+06	1.07462e+06	32431.1	43789.3	28720.2	761878	41772.2	283898	18427.7	756143	208460	986254	933164	22012.9	140838	803074	2.28544e+06
M332T272	17a-Hydroxypregnenolone	332.233	272.1	332.235	7.22385	C21H32O3	[M]+	Steroids and steroid derivatives	Pregnane steroids	C05138	Lipid metabolism; Endocrine and metabolic disease; Global and overview maps; Endocrine system	387-79-1	HMDB0000363	BioDeepDB	1	pos	269455	224036	221671	245024	458410	411420	334898	249293	371864	286375	427009	318370	416193	446514	286256	327219	292202	248885	442481	379734	298129	360187	180470	252859
M350T559	N-(2-fluro-ethyl) arachidonoyl amine	350.28	558.7	349.278	15.8616	C22H36FNO	[M+H]+					166100-37-4		BioDeepDB	1	pos	2.83717e+06	2.51445e+06	1.99233e+06	2.53602e+06	3.80911e+06	3.1142e+06	1.88281e+06	2.38005e+06	2.92838e+06	2.58815e+06	2.93227e+06	2.20325e+06	5.51154e+06	4.28336e+06	1.78847e+06	1.65993e+06	2.19185e+06	3.19752e+06	2.47577e+06	5.26605e+06	1.87553e+06	1.6159e+06	2.46827e+06	2.74626e+06
M332T624	Alpha-Linolenoyl ethanolamide	332.288	623.7	349.298	8.02316	C22H39NO2	[M+H-H2O]+	Organonitrogen compounds	Amines	C13828		150314-34-4	HMDB0013624	BioDeepDB	1	pos	360120	877283	417901	454426	399113	419137	440343	646939	772287	492216	396729	526860	520767	575338	634991	619257	501914	424799	745498	559908	644295	604046	335600	609268
M335T49	Mukurozidiol	335.12	48.8	334.105	20.9597	C17H18O7	[M+H]+	Coumarins and derivatives	Furanocoumarins	C09141		482-25-7	HMDB0030651	BioDeepDB	1	pos	1.15635e+06	855791	944497	880013	1.03355e+06	983308	948702	973861	1.20698e+06	723186	998519	1.19037e+06	1.08637e+06	1.04283e+06	1.05042e+06	800490	1.07277e+06	687160	1.07349e+06	912949	1.03394e+06	930041	593723	772873
M336T284	Fentanyl	336.218	283.5	336.22	7.62461	C22H28N2O	[M]+			C06998		437-38-7		BioDeepDB	1	pos	18454.5	13121.9	18958	1.886e+06	646916	952356	696093	1.2719e+06	9.92454e+06	9.44226e+06	6.10079e+06	9.3364e+06	7.53922e+06	7.58383e+06	6.39782e+06	12371.4	5.7899e+06	7.31491e+07	1.44254e+06	2.30135e+06	1.05207e+06	2.17177e+06	1.42696e+06	2.68288e+07
M338T524	Amodiaquine	338.139	523.9	355.145	2.46644	C20H22ClN3O	[M+H-H2O]+	Quinolines and derivatives	Aminoquinolines and derivatives	C07626		86-42-0	HMDB0014751	BioDeepDB	1	pos	92598.4	76600.7	86980.9	85821.1	114451	107576	143858	83367.2	144647	92096.8	147339	86944.2	128116	111016	112034	86514.9	97134.3	59999.8	98093.2	87662.9	96053	82891.9	51728.9	94476.3
M338T361	Prostaglandin A2-d4	338.234	361	338.24	15.1269	C20H26D4O4	[M]+							BioDeepDB	1	pos	56859.7	213590	211703	198429	214390	161000	220495	170140	120884	45250.7	139222	199964	36009.7	36096.6	36679.9	28286.2	148310	181288	161589	187613	86271.9	70042.4	39516.3	40706.2
M355T494_2	N-Hexadecyl-L-hydroxyproline	355.304	493.9	355.309	14.1502	C21H41NO3	[M]+					76652-69-2		BioDeepDB	1	pos	2.56234e+06	829177	746739	1.68095e+06	2.71624e+06	2.58802e+06	476752	381747	2.38761e+06	3.224e+06	1.35785e+06	1.73939e+06	4.07779e+06	277987	87732.6	328755	1.10227e+06	1.9991e+06	7.69429e+06	6.64131e+06	5.94118e+06	602226	2.40234e+06	2.08688e+06
M322T634	AM3102	322.311	634.1	339.314	14.596	C21H41NO2	[M+H-H2O]+					213182-22-0		BioDeepDB	1	pos	2.53473e+06	1.38299e+06	2.24672e+06	1.50178e+06	1.54937e+06	1.1513e+06	1.29104e+06	409952	1.14514e+06	895852	612092	919343	1.27073e+06	1.12777e+06	1.08673e+06	1.53389e+06	1.17132e+06	1.46575e+06	1.60459e+06	1.59391e+06	1.63216e+06	2.11429e+06	1.54446e+06	1.0654e+06
M342T420	Cannabidiol dimethyl ether	342.254	419.6	342.256	5.49395	C23H34O2	[M]+					1242-67-7		BioDeepDB	1	pos	406461	403544	327492	264932	280341	274313	293449	338942	19839.7	94400.9	130798	81922.9	17340.5	1458.82	4248.8	117984	23137.6	18067.9	21817.9	20153.6	195727	364383	275716	398836
M365T548	Quinestrol	365.247	547.7	364.24	1.57702	C25H32O2	[M+H]+	Steroids and steroid derivatives	Estrane steroids	C07619		152-43-2	HMDB0015579	BioDeepDB	1	pos	497209	352179	544015	395246	386245	503312	349641	548977	586249	563783	563696	551843	328541	390391	466701	441377	521861	979188	652624	630331	449017	550080	462338	530083
M370T532	Arachidoyl glycine	370.332	531.8	369.324	0.890426	C22H43NO3	[M+H]+					617703-96-5		BioDeepDB	1	pos	828844	409541	1.8336e+06	495097	695184	987202	375152	532420	878641	797217	1.11055e+06	833221	712372	788767	593485	554480	1.16934e+06	819285	544970	586394	912326	847286	498153	217055
M353T658	tetracosanal	353.378	657.8	352.371	0.260792	C24H48O	[M+H]+							BioDeepDB	1	pos	6.18641e+06	3.31726e+06	4.1635e+06	6.44888e+06	3.64892e+06	5.09671e+06	735242	771665	2.36521e+06	4.72007e+06	4.23946e+06	1.7039e+06	3.74826e+06	3.305e+06	2.26493e+06	4.27923e+06	2.5115e+06	2.29338e+06	6.84473e+06	4.6252e+06	6.06553e+06	4.16639e+06	4.37423e+06	5.33197e+06
M356T406	Conessine	356.315	405.7	356.319	11.7873	C24H40N2	[M]+			C06545		546-06-5/5913-82-6		BioDeepDB	1	pos	601163	23419.5	248480	717890	330071	590053	63515.3	31389	93876.2	288268	380953	81371.9	102415	75713.1	216539	273095	107612	22213.1	292193	266330	212424	157009	45608.8	139000
M358T467	13,14-dihydro Prostaglandin F1&alpha	358.275	466.8	358.272	8.58467	C20H38O5	[M]+					20592-20-5		BioDeepDB	1	pos	1.11342e+06	999511	1.04567e+06	1.16658e+06	1.12602e+06	1.18051e+06	1.096e+06	1.18107e+06	991934	1.00602e+06	1.15201e+06	1.22476e+06	1.16292e+06	1.25565e+06	996521	1.19442e+06	1.08189e+06	1.27194e+06	1.12244e+06	1.09378e+06	1.09724e+06	1.1994e+06	675241	1.07586e+06
M360T574	N-arachidonoyl dihydroxypropylamine	360.293	573.7	377.293	19.5393	C23H39NO3	[M+H-H2O]+					183718-70-9		BioDeepDB	1	pos	858520	927122	1.13789e+06	1.16721e+06	768561	1.34691e+06	1.80563e+06	1.08954e+06	2.0906e+06	1.73017e+06	269551	1.49954e+06	1.95829e+06	879855	1.28963e+06	1.81474e+06	1.10158e+06	1.39204e+06	1.31888e+06	1.19604e+06	1.61234e+06	1.31714e+06	1.34706e+06	1.55459e+06
M361T519	Fenofibrate	361.119	518.5	360.113	2.97963	C20H21ClO4	[M+H]+	Benzene and substituted derivatives	Benzophenones	C07586		49562-28-9	HMDB0015173	BioDeepDB	1	pos	134764	100820	103034	160901	118421	125913	107465	84192.4	124359	114445	178776	81886.3	93027.8	122886	103017	85432.8	157187	94786.8	114433	99535.5	80194.8	117748	21014.7	71663.7
M361T373	Cetaben	361.298	373.4	361.298	0.887112	C23H39NO2	[M]+					55986-43-1		BioDeepDB	1	pos	444962	133530	285968	409477	309811	391365	115617	192324	150291	221885	306316	144044	210041	263053	204782	348226	206619	490411	327046	439398	191840	373434	269016	169887
M366T48	Amoxicillin	366.109	48	365.104	6.76301	C16H19N3O5S	[M+H]+	Lactams	Beta lactams	C06827		26787-78-0	HMDB0015193	BioDeepDB	1	pos	1.00597e+06	150145	249255	1.03539e+06	1.24449e+06	1.27442e+06	1.86579e+06	1.16171e+06	1.81863e+06	1.00196e+06	1.22367e+06	974026	2.16651e+06	349599	686557	342515	176113	127479	1.56105e+06	322918	705199	610329	157594	1.00855e+06
M384T585	AX 048	384.312	585.2	383.304	1.99108	C22H41NO4	[M+H]+					873079-69-7		BioDeepDB	1	pos	4.62278e+07	3.72091e+07	4.21346e+07	3.92928e+07	4.03557e+07	5.17509e+07	3.60574e+07	5.20861e+07	4.35612e+07	3.97487e+07	4.24209e+07	4.54896e+07	4.88216e+07	3.92543e+07	4.11322e+07	3.88784e+07	4.04514e+07	4.9229e+07	4.34487e+07	3.76362e+07	5.4638e+07	5.42308e+07	4.12463e+07	4.74468e+07
M369T34	Sufentanil	369.194	34.5	386.203	2.88737	C22H30N2O2S	[M+H-H2O]+	Benzene and substituted derivatives	Anilides	C08022		56030-54-7	HMDB0014846	BioDeepDB	1	pos	873066	682272	1.03806e+06	1.14631e+06	896246	1.43598e+06	666510	1.38833e+06	890085	2.95817e+06	1.01293e+06	773887	754155	564354	422058	430036	483235	1.97799e+06	482448	478187	480254	549997	478269	1.22239e+06
M371T601	Tamoxifen	371.221	601.3	371.225	9.9671	C26H29NO	[M]+	Stilbenes		C07108	Xenobiotics biodegradation and metabolism	10540-29-1	HMDB0014813	BioDeepDB	1	pos	1.13964e+07	1.0748e+07	1.61187e+07	1.70713e+07	1.45242e+07	1.02303e+07	2.18717e+07	2.34495e+07	1.5646e+07	2.19783e+07	1.09737e+07	2.02887e+07	1.62661e+07	1.11252e+07	1.20604e+07	9.29532e+06	1.71882e+07	1.8068e+07	1.34587e+07	1.76767e+07	1.35577e+07	1.63951e+07	9.29133e+06	1.59982e+07
M371T410	HU210	371.291	410.2	388.298	1.85529	C25H40O3	[M+H-H2O]+					112830-95-2		BioDeepDB	1	pos	462779	402771	513069	470346	310939	343804	317900	364939	282767	222849	259684	271390	521860	525126	434869	488232	180201	248160	212396	265603	1.36449e+06	1.018e+06	1.66862e+06	1.63515e+06
M389T361	N-oleoyl taurine	389.25	361.5	389.26	25.8953	C20H39NO4S	[M]+					52514-04-2		BioDeepDB	1	pos	792559	1.53046e+06	1.43866e+06	1.17089e+06	1.36073e+06	918477	276981	941711	1.13378e+06	804768	806505	515976	772819	781746	973546	952074	762860	873153	930621	1.16493e+06	926313	1.01234e+06	492457	572573
M372T347_1	Finasteride	372.275	347	372.278	6.38775	C23H36N2O2	[M]+					98319-26-7	HMDB01984	BioDeepDB	1	pos	2.24841e+07	2.80954e+07	1.99243e+07	2.18219e+07	6.27798e+06	2.27198e+07	1.3207e+07	1.90913e+07	1.26857e+07	1.77784e+07	1.95961e+07	1.91272e+07	1.81648e+07	1.79585e+07	1.46068e+07	1.41645e+07	1.13039e+07	2.03516e+07	1.39182e+07	1.76244e+07	1.97165e+07	2.28994e+07	1.17764e+07	1.56577e+07
M378T48	Cefdinir	378.024	48.5	395.036	11.285	C14H13N5O5S2	[M+H-H2O]+	Lactams	Beta lactams	C08110		91832-40-5	HMDB0014675	BioDeepDB	1	pos	2.86606e+06	1.5807e+06	978717	1.17569e+06	218479	817706	681500	1.1379e+06	2.17861e+06	2.09657e+06	82150.6	64829.9	1.26868e+06	859743	700854	492524	837228	783952	698227	1.41527e+06	1.81879e+06	900100	22832.3	536515
M396T552	PGD2-EA	396.28	552.1	395.267	13.3214	C22H37NO5	[M+H]+					398138-28-8		BioDeepDB	1	pos	95835.5	101017	230274	275536	79688.7	216238	175131	286535	363505	430785	373067	240192	277940	380190	388790	371866	298891	450294	451588	356084	464108	357016	304707	346240
M380T656	C-6 Ceramide	380.347	656.2	397.356	3.83959	C24H47NO3	[M+H-H2O]+					124753-97-5		BioDeepDB	1	pos	2.22621e+06	2.27452e+06	2.16369e+06	1.72515e+06	1.51388e+06	1.35511e+06	1.68082e+06	1.44813e+06	1.56129e+06	1.52786e+06	1.65965e+06	1.54037e+06	2.10574e+06	2.01715e+06	2.11134e+06	2.21417e+06	1.6771e+06	1.47318e+06	1.35502e+06	2.17804e+06	3.74452e+06	3.16483e+06	2.82966e+06	4.17353e+06
M383T690_2	Campesterol	383.368	689.6	400.37	1.04338	C28H48O	[M+H-H2O]+	Steroids and steroid derivatives	Ergostane steroids	C01789	Lipid metabolism; Chemical structure transformation maps; Global and overview maps; Metabolism of terpenoids and polyketides	474-62-4	HMDB0002869	BioDeepDB	1	pos	4.3407e+06	4.04914e+06	4.40727e+06	4.32508e+06	4.16864e+06	4.38515e+06	4.43355e+06	3.9089e+06	4.17256e+06	4.55402e+06	4.67667e+06	4.43078e+06	4.53693e+06	4.46994e+06	4.65807e+06	4.30716e+06	4.82797e+06	4.68361e+06	4.87063e+06	4.31784e+06	4.16265e+06	3.9917e+06	4.58222e+06	4.09452e+06
M384T423_2	Prostaglandin F2alpha Ethanolamide-d4	384.305	422.9	401.308	0.52042	C22H35D4NO5	[M+H-H2O]+							BioDeepDB	1	pos	1.01496e+07	9.34777e+06	7.99575e+06	8.67016e+06	2.11644e+06	2.08189e+06	6.02321e+06	6.91695e+06	5.87231e+06	1.00871e+07	9.33494e+06	6.69274e+06	4.49176e+06	5.12584e+06	1.68738e+06	1.23558e+06	1.39666e+07	2.03441e+07	1.42311e+07	1.47841e+07	7.80408e+06	4.71646e+06	7.02929e+06	6.29411e+06
M384T460_2	L-759,633	384.303	460.4	384.303	0.59985	C26H40O2	[M]+					174627-50-0		BioDeepDB	1	pos	3.08092e+06	2.91449e+06	3.64612e+06	1.26888e+06	2.06304e+06	3.30165e+06	1.36674e+06	2.00937e+06	1.63543e+06	182928	123799	977994	1.1885e+06	1.09438e+06	1.55408e+06	1.33891e+06	2.80353e+06	1.0892e+06	1.26993e+06	1.11806e+06	1.61428e+06	1.7944e+06	1.86296e+06	813547
M384T671	Behenoyl-EA	384.384	671.1	383.376	0.767462	C24H49NO2	[M+H]+					94109-05-4		BioDeepDB	1	pos	8.70005e+06	6.96248e+06	8.84923e+06	8.42593e+06	9.87556e+06	8.765e+06	3.19181e+06	8.4207e+06	8.64094e+06	9.33997e+06	2.33822e+06	8.06322e+06	8.72962e+06	8.86857e+06	7.54147e+06	7.60271e+06	7.47594e+06	7.11329e+06	6.41392e+06	7.77264e+06	8.45935e+06	7.26486e+06	1.87314e+06	4.57426e+06
M386T357	HU-211	386.291	356.9	386.282	23.0524	C25H38O3	[M]+					112924-45-5		BioDeepDB	1	pos	9.33824e+06	1.08277e+07	1.12476e+07	5.85876e+06	7.64881e+06	9.91613e+06	8.19876e+06	6.71129e+06	8.6575e+06	6.36657e+06	7.99492e+06	6.60514e+06	6.90896e+06	5.33914e+06	6.00896e+06	7.01081e+06	7.03475e+06	7.894e+06	7.11429e+06	8.85655e+06	5.4401e+06	5.99289e+06	4.60229e+06	7.69851e+06
M386T577	2-Arachidonoyl Glycerol-d8	386.334	576.5	386.327	18.5754	C23H30D8O4	[M]+					924894-97-3		BioDeepDB	1	pos	573422	323682	357507	267866	524556	453196	649947	257793	362957	843341	926131	770019	820717	385751	656437	463045	546801	519684	487485	382417	296072	606381	195285	423545
M387T458_1	Terazosin	387.193	457.7	387.191	5.42365	C19H25N5O4	[M]+	Diazinanes	Piperazines	C07127		63590-64-7	HMDB0015293	BioDeepDB	1	pos	8.25619e+06	9.55567e+06	9.33771e+06	6.0464e+06	5.28999e+06	8.21067e+06	5.23383e+06	7.33224e+06	9.02074e+06	5.59293e+06	5.81865e+06	6.59886e+06	7.626e+06	6.08583e+06	4.37984e+06	7.00912e+06	6.19254e+06	6.45107e+06	7.02357e+06	6.27491e+06	5.97356e+06	6.64335e+06	5.07801e+06	7.74698e+06
M387T425	3-BETA-ENANTHOXYANDROST-1-EN-17-ONE	387.323	425.2	386.318	7.11703	C26H42O2	[M+H]+							BioDeepDB	1	pos	1.00322e+06	771263	790942	767959	275512	207860	293303	262806	317214	321462	305121	183211	248485	209754	280485	265823	279003	310268	212510	319134	670079	590581	435366	702440
M388T297	17-phenyl trinor PGF2alpha amide	388.249	297.2	387.241	2.0322	C23H33NO4	[M+H]+					155205-89-3		BioDeepDB	1	pos	7.8417e+06	6.62694e+06	1.5605e+07	1.41165e+07	8.45125e+06	1.14997e+07	4.53021e+06	2.3803e+07	6.14953e+06	6.72072e+06	8.47247e+06	8.42901e+06	5.15185e+06	5.23926e+06	1.3824e+07	7.06514e+06	1.13728e+07	2.69788e+06	1.03735e+07	6.17796e+06	4.54713e+06	1.56065e+07	8.72649e+06	1.10785e+07
M389T429	U-18666A	389.326	429	388.321	5.846	C25H41NO2	[M+H]+					3039-71-2		BioDeepDB	1	pos	383335	521059	642679	688916	424059	592056	1.74961e+06	1.11653e+06	383105	326703	491012	394314	377512	200470	215357	61775.7	341188	328542	206252	289431	352816	229034	369017	768808
M390T362	Palmitoyl 3-carbacyclic Phosphatidic Acid	390.255	361.9	390.254	2.5343	C20H39O5P	[M]+					476310-22-2		BioDeepDB	1	pos	44612.4	16449.9	149909	30224.8	20713.6	99804.9	150675	100663	9606.36	93958.8	29272.1	28254	82287.1	23262.4	82776.2	24348.4	234110	325559	158403	167791	115444	103644	88282.5	12465.3
M391T481	Butaprost	391.289	481.2	408.288	11.2449	C24H40O5	[M+H-H2O]+					69685-22-9		BioDeepDB	1	pos	1.23458e+06	665645	752390	768941	436186	448152	594313	310168	686836	833623	743834	446523	359375	239914	73626.2	52116.2	1.52565e+06	2.20612e+06	2.06977e+06	1.70446e+06	1.10724e+06	1.12454e+06	875380	1.39687e+06
M391T598	4-Hydroxyphenylretinamide	391.252	597.8	391.251	0.981977	C26H33NO2	[M]+					65646-68-6		BioDeepDB	1	pos	1.00328e+06	2.61278e+06	1.93291e+06	1.10989e+06	1.13615e+06	687157	1.13926e+06	1.48093e+06	2.18409e+06	1.52332e+06	2.61176e+06	1.2e+06	2.82097e+06	1.29161e+06	1.59549e+06	1.52761e+06	1.39794e+06	1.19895e+06	1.7717e+06	1.38025e+06	2.11864e+06	1.37646e+06	769272	1.78983e+06
M393T349_2	17-phenyl trinor Prostaglandin F2alpha-d4	393.257	349.1	392.25	1.41668	C23H28D4O5	[M+H]+							BioDeepDB	1	pos	1.55515e+06	1.94417e+06	1.81548e+06	1.56452e+06	1.15804e+06	1.2277e+06	1.3186e+06	1.26568e+06	1.05765e+06	1.25342e+06	1.28313e+06	1.22519e+06	599973	622174	404863	1.3965e+06	1.67436e+06	1.48194e+06	1.68692e+06	1.25163e+06	1.4898e+06	1.29716e+06	1.37801e+06	1.43983e+06
M394T48	G-1	394.04	48.4	411.047	0.0708203	C21H18BrNO3	[M+H-H2O]+					925420-28-6		BioDeepDB	1	pos	272111	260177	261207	324185	342878	364921	406603	252977	437806	310531	306427	289192	346827	266456	447546	73275.2	399605	261812	339276	254427	303413	263430	163379	269025
M395T495	Arachidonoyl-1-thio-Glycerol	395.261	494.6	394.254	1.26499	C23H38O3S	[M+H]+							BioDeepDB	1	pos	158157	183126	176838	165683	151489	142755	142400	190329	203510	241924	218628	155867	189320	148971	165420	207534	166883	262837	158730	202129	299233	221054	151102	152959
M394T566	Petromyzonol	394.319	566.1	394.308	25.9283	C24H42O4	[M-H2O+NH4]+			C16258		28979-29-5		BioDeepDB	1	pos	1.09742e+08	1.18166e+08	1.0521e+08	9.33295e+07	8.22949e+07	7.21898e+07	1.19716e+08	8.4167e+07	2.48748e+07	3.14521e+07	2.43532e+07	2.82189e+07	8.10974e+06	1.52587e+07	1.17603e+07	1.49065e+07	5.05077e+07	3.56617e+07	3.36808e+07	3.82683e+07	1.48239e+07	1.07665e+07	3.09476e+06	9.74591e+06
M394T520_2	C-8 Ceramine	394.404	519.8	411.408	9.19413	C26H53NO2	[M+H-H2O]+					170926-06-4		BioDeepDB	1	pos	1.07555e+06	2.47636e+06	777587	616309	1.16884e+06	1.29293e+06	1.81257e+06	2.524e+06	3.38261e+06	1.99585e+06	946371	2.13422e+06	1.48797e+06	1.41039e+06	1.15958e+06	679182	1.18272e+06	1.21009e+06	1.645e+06	1.73447e+06	1.61675e+06	646491	979019	1.00524e+06
M395T266	GANGALEOIDIN	394.997	266.4	412.012	18.036	C18H14Cl2O7	[M+H-H2O]+					55365-63-4		BioDeepDB	1	pos	25115.3	24799.9	160676	35976.2	148250	24705.6	174553	12504.3	42740.6	28196.5	102931	22944	42265.1	38615.1	228619	15256	135553	135252	26508	19592.5	19301	125883	8849.22	102521
M397T500	Flecainide	397.129	500	414.138	4.44692	C17H20F6N2O3	[M+H-H2O]+	Benzene and substituted derivatives	Benzoic acids and derivatives	C07001		54143-55-4	HMDB0015326	BioDeepDB	1	pos	2.37695e+06	1.70625e+06	2.82093e+06	1.90896e+06	927032	1.95199e+06	582612	891028	358817	615656	904439	484027	52471	38059	221750	224847	1.83829e+06	1.64329e+06	2.6305e+06	4.02892e+06	211572	374978	647241	625781
M398T618	Salmeterol	398.269	617.9	415.272	9.87775	C25H37NO4	[M+H-H2O]+	Benzene and substituted derivatives	Benzyl alcohols	C07241		89365-50-4	HMDB0015073	BioDeepDB	1	pos	570798	126480	2.64239e+06	823687	6.6086e+06	7.43209e+06	7.2061e+06	2.87393e+06	4.79085e+06	3.49599e+06	543798	360153	3.09884e+06	2.72253e+06	7.4502e+06	4.37168e+06	2.18981e+06	5.77718e+06	6.76401e+06	589140	3.62405e+06	561501	3.54198e+06	5.19024e+06
M417T416	N-Oleoyl dopamine	417.32	416.1	417.324	9.10571	C26H43NO3	[M]+			C12272	Signaling molecules and interaction	105955-11-1		BioDeepDB	1	pos	107688	76222.6	34289.6	81069.3	112998	93217.2	116910	50291.5	90727	35258.7	137407	35872.1	144241	127232	61220.5	158452	116346	140143	102309	108191	107914	44277	68932.1	285598
M401T638	20a,22b-Dihydroxycholesterol	401.342	637.7	418.345	1.24582	C27H46O3	[M+H-H2O]+	Steroids and steroid derivatives	Bile acids, alcohols and derivatives	C05501	Lipid metabolism; Global and overview maps	15234-55-6/596-94-1	HMDB0006763	BioDeepDB	1	pos	7.81117e+06	8.68214e+06	7.19707e+06	7.57507e+06	5.7888e+06	7.30932e+06	5.48439e+06	5.33975e+06	7.84328e+06	6.81035e+06	1.22376e+07	7.19698e+06	6.09739e+06	4.35138e+06	9.15361e+06	4.87497e+06	3.59276e+06	5.63802e+06	6.47371e+06	6.48506e+06	6.97127e+06	8.80414e+06	4.72721e+06	7.58155e+06
M420T509_3	CAY10510	420.231	509.2	420.231	0.00564213	C24H33FO5	[M]+					291303-34-9		BioDeepDB	1	pos	2.7891e+07	2.30919e+07	2.85631e+07	2.15157e+07	1.13357e+07	1.72831e+07	2.02138e+07	1.34437e+07	4.34804e+06	3.01108e+06	3.47796e+06	1.93628e+06	385699	305201	1.69555e+06	485916	1.797e+07	8.26578e+06	1.47738e+07	1.63153e+07	6.62394e+06	6.38642e+06	6.64932e+06	1.05945e+07
M385T462	Thiocholesterol	385.331	462	402.332	17.1588	C27H46S	[M+H-H2O]+					1249-81-6		BioDeepDB	1	pos	166609	174761	322047	727006	93531.6	206438	377101	531462	307073	585533	468853	462182	495161	735129	354976	93718.2	503321	339212	461012	384000	111028	173641	191139	247895
M404T576_1	METERGOLINE	404.235	576	403.226	3.46333	C25H29N3O2	[M+H]+					17692-51-2		BioDeepDB	1	pos	5.39012e+07	7.26639e+07	6.81112e+07	6.11833e+07	146898	559770	1.09056e+06	1.09327e+06	2.23125e+07	1.87188e+07	3.3851e+07	2.17297e+07	923416	5.32954e+06	1.25147e+06	653202	1.77139e+07	1.91559e+07	2.31477e+07	2.25447e+07	2.24343e+07	3.10106e+07	9.00106e+06	2.42751e+07
M405T480	Asp-Phe4Cl-OH	405.043	480.3	422.052	3.35563	C18H15ClN2O8	[M+H-H2O]+							BioDeepDB	1	pos	517713	428338	190276	443549	248702	421064	245111	137805	466309	404747	515800	172509	458268	253971	438902	184997	187380	171980	435880	446668	417941	370023	244674	363723
M405T576	7-hydroxycoumarinyl-gamma-Linolenate	405.239	576	422.246	2.03441	C27H34O4	[M+H-H2O]+					161180-12-7		BioDeepDB	1	pos	6.62392e+06	9.69733e+06	1.06002e+06	1.01228e+07	6.87433e+06	1.04787e+07	2.20485e+07	2.5623e+07	7.19471e+06	409990	1.78372e+06	684977	8.81669e+06	492874	307915	1.1092e+06	1.1582e+06	149960	867046	1.51618e+06	1.38071e+07	9.07523e+06	8.33574e+06	6.29812e+06
M406T48	Cephapirin	406.051	48.4	423.056	6.2406	C17H17N3O6S2	[M+H-H2O]+	Carboxylic acids and derivatives	Amino acids, peptides, and analogues	C06896		21593-23-7	HMDB0015270	BioDeepDB	1	pos	81564.9	272489	164045	369082	430266	331242	317387	69937.7	409075	262289	282056	128872	147539	294377	351156	197960	66789.9	118494	91796.5	130888	257338	213023	150191	246879
M407T406	alpha-Amyrone	407.355	405.9	424.371	18.8586	C30H48O	[M+H-H2O]+	Prenol lipids	Triterpenoids			638-96-0	HMDB0036659	BioDeepDB	1	pos	822317	721648	874786	883426	598790	869001	523422	446555	553370	540848	671922	526756	658630	750230	753767	755351	421035	519367	415593	418103	1.28648e+06	1.42492e+06	1.67001e+06	1.60126e+06
M409T670	PGF2alpha diethyl amide	409.311	669.7	409.319	19.5667	C24H43NO4	[M]+							BioDeepDB	1	pos	96543.2	100367	2.22888e+06	122749	125894	141977	183625	103553	1.53893e+06	3.14453e+06	3.51471e+06	1.27718e+06	3.18175e+06	1.81413e+06	2.41131e+06	2.16093e+06	255115	275881	196861	181820	119205	116654	96891.6	151255
M411T599	Squalene	411.401	599.5	410.391	4.67671	C30H50	[M+H]+	Prenol lipids	Triterpenoids	C00751	Lipid metabolism; Chemical structure transformation maps; Global and overview maps; Metabolism of terpenoids and polyketides	111-02-4/7683-64-9	HMDB0000256	BioDeepDB	1	pos	182835	1.38661e+06	4.15022e+06	1.37722e+06	1.80689e+06	2.26233e+06	360692	982089	1.79999e+06	777662	1.84121e+06	2.55296e+06	2.53427e+06	1.75608e+06	1.89873e+06	1.88667e+06	4.14859e+06	5.22589e+06	4.50848e+06	1.47054e+06	701386	574304	776650	439569
M415T48	Cephaloridine	415.054	48.4	415.066	29.6347	C19H17N3O4S2	[M]+			C11754	Digestive system	50-59-9		BioDeepDB	1	pos	215140	605335	1.34807e+06	2.86596e+06	963335	973298	292055	1.13937e+06	1.03858e+06	905699	1.66121e+06	929856	659760	1.92821e+06	2.03943e+06	471436	701052	517079	426782	603489	447988	203187	104531	267423
M415T460	tomatidine	415.353	460.2	415.345	20.4236	C27H45NO2	[M]+							BioDeepDB	1	pos	206307	440399	1.02884e+06	393587	496599	512753	397529	331551	100272	214459	438223	246149	352525	122015	220031	196000	121284	141630	858958	340347	1.12243e+06	648301	101774	174231
M419T458	Termitomycamide B	419.302	458.3	436.309	0.370774	C28H40N2O2	[M+H-H2O]+					1254277-89-8		BioDeepDB	1	pos	1.82513e+06	279989	2.39056e+06	2.22378e+06	253675	1.23988e+06	5.22748e+06	198967	3.04354e+07	1.65262e+07	4.23896e+07	4.12475e+07	1.44537e+07	1.87232e+06	3.2741e+06	2.20331e+07	7.82327e+06	72300.8	6.59761e+06	4.752e+06	97751.8	212966	1.45677e+06	1.8439e+06
M421T523	Topotecan	421.165	522.9	421.164	2.6118	C23H23N3O5	[M]+	Camptothecins		C11158	Digestive system	119413-54-6/123948-87-8	HMDB0015164	BioDeepDB	1	pos	823560	1.10201e+06	1.15968e+06	1.13748e+06	1.03701e+06	416252	1.04177e+06	1.28782e+06	604971	1.24936e+06	1.3224e+06	1.2978e+06	1.30544e+06	261408	95673.1	1.42895e+06	934680	1.14503e+06	1.03012e+06	434694	2.06837e+06	1.62806e+06	422972	1.32804e+06
M421T458_2	AGELASINE	421.322	458.2	421.321	3.01575	C26H39N5	[M]+							BioDeepDB	1	pos	2.01044e+07	4.99898e+06	2.05174e+07	1.96489e+07	1.34325e+07	1.32546e+07	1.45293e+07	1.4425e+07	1.26189e+07	1.61226e+07	1.45626e+07	1.44048e+07	1.064e+07	1.0603e+07	1.24257e+07	1.08136e+07	5.78381e+07	5.06508e+07	5.37884e+07	6.6392e+07	2.43024e+07	2.50651e+07	3.04219e+07	3.12127e+07
M422T470	N-Arachidonyl dopamine	422.302	470.3	439.309	1.97489	C28H41NO3	[M+H-H2O]+			C12271	Sensory system; Signaling molecules and interaction	199875-69-9		BioDeepDB	1	pos	3.96296e+06	400796	4.27637e+06	955025	266701	5.39632e+06	3.54962e+06	1.78169e+06	3.15157e+06	905095	493130	2.0276e+06	471646	331736	2.73232e+06	3.05671e+06	695803	3.93674e+06	1.81708e+06	917428	449355	795883	2.58134e+06	2.21878e+06
M425T576_1	Benazepril	425.211	576.1	424.2	9.17192	C24H28N2O5	[M+H]+	Carboxylic acids and derivatives	Amino acids, peptides, and analogues	C06843		86541-75-5	HMDB0014682	BioDeepDB	1	pos	4.48862e+07	7.51129e+07	3.81543e+07	8.27863e+07	5.08602e+07	4.15019e+07	4.43585e+07	2.50238e+07	7.191e+07	1.51176e+07	5.43184e+07	4.64327e+07	4.74428e+07	4.0006e+07	8.52521e+07	6.9756e+07	3.64749e+07	2.92266e+08	1.91165e+08	2.85944e+08	4.87761e+08	2.97757e+08	1.72626e+08	8.02077e+07
M425T561	Stypoltrione	425.268	561.4	424.261	2.11631	C27H36O4	[M+H]+							BioDeepDB	1	pos	6.89062e+06	5.75625e+06	5.367e+06	5.22566e+06	1.18288e+06	1.32218e+06	2.43173e+06	2.02865e+06	340301	857983	388680	411592	269181	195982	166705	170325	2.0624e+06	2.91546e+06	1.85607e+06	1.0048e+06	340108	351734	670954	519417
M426T447	METHYLBENZETHONIUM	426.333	447	425.329	9.14779	C28H43NO2	[M+H]+					1320-44-1		BioDeepDB	1	pos	23201	2360.88	18099.4	22360.6	35869	36835.2	25913.3	11285.4	30004.2	23736.3	53987.4	31490.2	38663.1	31107.8	17311.3	18075.4	29162.3	2693.95	17293.8	4473.79	20183.9	22917.9	3402.19	19648.9
M427T492_3	(S)-2,3-Epoxysqualene	427.398	491.8	426.386	11.2869	C30H50O	[M+H]+	Prenol lipids	Triterpenoids	C01054	Lipid metabolism; Chemical structure transformation maps; Global and overview maps; Metabolism of terpenoids and polyketides	54910-48-4/7200-26-2	HMDB0001188	BioDeepDB	1	pos	996784	501592	692352	880387	787277	1.21695e+06	1.29073e+06	901578	907526	575214	1.27999e+06	894916	759983	811322	984572	949500	650071	1.11105e+06	1.52889e+06	1.16321e+06	790824	533626	872935	486166
M427T602	Phospho-anandamide	427.244	602.4	426.241	9.07209	C22H37NO5P	[M+H]+			C19913	Nervous system	183323-26-4		BioDeepDB	1	pos	209845	255109	288691	404710	360988	531619	347647	242191	313416	22606.5	451204	295853	344981	293523	274324	291198	225486	200503	774461	232461	667571	174406	193482	22115.9
M427T264	Leukotriene E4-d5	427.263	263.7	444.271	0.0147005	C23H32D5NO5S	[M+H-H2O]+							BioDeepDB	1	pos	2.93656e+06	2.541e+06	1.9512e+06	2.48148e+06	1.04943e+06	1.00296e+06	762036	985467	602557	633495	517183	540033	357939	480187	400817	117054	2.59278e+06	2.58203e+06	2.34641e+06	2.43514e+06	682366	981546	747634	677251
M429T659	Araguspongin B	429.37	659.2	446.387	21.5804	C28H50N2O2	[M+H-H2O]+					123000-02-2		BioDeepDB	1	pos	1.0595e+07	5.73741e+06	1.30644e+07	1.87303e+07	1.22794e+07	1.04595e+07	4.20672e+06	1.21266e+07	9.54281e+06	1.21571e+07	1.46369e+07	1.12992e+07	1.51664e+07	6.18694e+06	7.48543e+06	4.42797e+06	9.46073e+06	1.35756e+07	1.19934e+07	9.61563e+06	1.06856e+07	4.2625e+06	1.74225e+06	2.27417e+06
M429T564	Xestospongin C	429.383	564.3	446.387	8.3961	C28H50N2O2	[M+H-H2O]+					88903-69-9		BioDeepDB	1	pos	2.33742e+06	180346	3.69149e+06	2.98426e+06	3.4906e+06	286717	381887	1.55151e+06	2.90544e+06	2.99039e+06	3.27095e+06	6.57715e+06	4.26751e+06	2.54638e+06	7.55343e+06	6.73901e+06	3.16231e+06	6.88646e+06	7.18593e+06	4.83781e+06	7.59401e+06	6.1275e+06	1.03084e+06	80583.8
M430T329	Hecogenin	430.306	329.1	430.308	4.64785	C27H42O4	[M]+			C08902	Chemical structure transformation maps	467-55-0		BioDeepDB	1	pos	92676	25153.6	1.55191e+06	73156.3	171516	3.24649e+06	1.80544e+06	53149.2	22618.2	1.28297e+06	63947.4	1.50816e+06	95966.7	36679.4	2.13077e+06	1.74268e+06	897448	51765	36826.2	1.0276e+06	12056.9	1.57922e+06	1.72988e+06	828392
M432T258_2	Latanoprost	432.29	258.2	432.288	6.53637	C26H40O5	[M]+					130209-82-4		BioDeepDB	1	pos	1.47356e+06	1.05652e+06	1.21506e+06	1.12628e+06	1.0843e+06	1.09038e+06	844595	1.05172e+06	390436	321392	320245	277081	35753.2	85301.7	133743	146871	1.41316e+06	1.28083e+06	1.64664e+06	1.50175e+06	638351	768260	545452	951441
M432T626	OMDM-1	432.355	626.1	431.34	18.6876	C27H45NO3	[M+H]+							BioDeepDB	1	pos	1.99368e+07	1.50957e+07	1.6287e+07	1.60513e+07	1.35649e+07	1.32298e+07	1.41318e+07	1.54012e+07	9.9646e+06	1.05618e+07	9.35229e+06	9.42546e+06	7.5786e+06	8.41078e+06	8.22293e+06	7.11653e+06	1.78649e+07	1.32502e+07	1.83391e+07	1.91217e+07	1.64987e+07	1.5647e+07	1.78994e+07	1.7173e+07
M433T50	AGK2	433.031	49.5	433.038	17.7403	C23H13Cl2N3O2	[M]+					304896-28-4		BioDeepDB	1	pos	1.27853e+06	83443.7	809558	189254	269199	284832	1.03631e+06	142478	798286	125102	934683	797985	752880	895440	800585	225699	662442	97845.3	1.19128e+06	201079	856335	141368	73755.1	151572
M433T464_1	Azadiradione	433.231	463.9	450.241	4.79513	C28H34O5	[M+H-H2O]+							BioDeepDB	1	pos	2.52742e+07	3.29238e+07	3.9633e+07	3.51311e+07	2.32342e+07	1.28096e+07	3.6349e+07	3.86191e+07	3.09446e+06	2.63682e+06	2.50615e+06	2.09706e+06	388741	380978	542119	230830	1.42374e+07	1.97327e+07	4.76284e+07	4.21489e+07	1.23027e+07	1.26003e+07	1.39687e+07	1.27311e+07
M436T625	OCTADECYLPHOSPHOCHOLINE	436.358	625.3	435.348	6.13783	C23H50NO4P	[M+H]+					65956-63-0		BioDeepDB	1	pos	2.66487e+07	2.52742e+07	2.84423e+07	2.08502e+07	1.68484e+07	1.71857e+07	6.68312e+06	2.04339e+07	2.97387e+06	1.07688e+07	1.35134e+07	1.16044e+07	7.19676e+06	9.17715e+06	3.55835e+06	2.76036e+06	2.49114e+07	2.18465e+07	1.63519e+07	2.72536e+07	2.31265e+07	1.88766e+07	2.30199e+07	2.20887e+07
M437T464_1	Fluphenazine	437.179	463.9	437.175	8.92084	C22H26F3N3OS	[M]+	Benzothiazines	Phenothiazines	C07010		69-23-8	HMDB0014761	BioDeepDB	1	pos	1.24143e+07	1.12189e+07	1.7247e+07	9.69123e+06	1.34282e+07	8.882e+06	1.06477e+07	7.72454e+06	1.18955e+07	5.83039e+06	1.50005e+07	1.15632e+07	9.28324e+06	7.6099e+06	8.79963e+06	9.02451e+06	1.26462e+07	1.30949e+07	3.4696e+06	3.60307e+06	3.9206e+06	9.08305e+06	9.59906e+06	9.25189e+06
M437T325	Diacetyl-10-gingerdiol	437.291	324.8	436.282	1.90946	C25H40O6	[M+H]+							BioDeepDB	1	pos	282139	280568	47463.1	287856	280961	212439	285094	363771	233126	306165	262622	143594	469847	253285	169048	352947	383419	350600	402868	278428	280287	415008	189567	521224
M455T521	CAY10631	455.427	520.8	454.417	4.73764	C32H54O	[M+H]+							BioDeepDB	1	pos	2.23478e+06	1.92333e+06	2.37782e+06	1.77965e+06	1.03665e+06	1.00763e+06	1.05962e+06	659956	862466	774464	1.06955e+06	1.02441e+06	1.59658e+06	1.33369e+06	1.37655e+06	1.45604e+06	720274	944793	629556	898089	3.53306e+06	3.00701e+06	3.69847e+06	4.92616e+06
M438T48_1	Cefotaxime	438.044	48.5	455.057	13.3914	C16H17N5O7S2	[M+H-H2O]+	Lactams	Beta lactams	C06885		63527-52-6	HMDB0014636	BioDeepDB	1	pos	156528	153393	447407	576179	772964	708951	245104	822341	1.21433e+06	184620	693924	247227	752784	985733	547633	889815	196307	98570.8	729184	707909	795754	557512	496695	103432
M438T48_2	Met-Phe4Cl-OH	438.066	48.5	438.065	0.833786	C19H19ClN2O6S	[M]+							BioDeepDB	1	pos	1.41691e+06	278067	1.5698e+06	1.3253e+06	526450	1.45935e+06	2.78904e+06	1.20635e+06	1.82175e+06	2.11744e+06	1.87883e+06	1.62827e+06	1.96794e+06	1.37305e+06	1.81956e+06	1.80582e+06	1.34391e+06	938365	1.90024e+06	1.6143e+06	1.79688e+06	1.59705e+06	1.95275e+06	1.68433e+06
M439T48	CAY10561	439.05	48.5	456.056	3.70035	C22H15Cl2FN4O2	[M+H-H2O]+					933786-58-4		BioDeepDB	1	pos	910959	996463	1.38592e+06	564944	1.12041e+06	1.15417e+06	636673	1.02853e+06	1.04064e+06	1.02586e+06	1.02811e+06	430224	1.26169e+06	1.14395e+06	510253	1.22235e+06	281660	461654	731173	406755	985973	774221	60756.1	294224
M441T288	Norverapamil	441.279	288.4	440.268	10.4242	C26H36N2O4	[M+H]+					67018-85-3		BioDeepDB	1	pos	1.77288e+06	1.34103e+06	789660	2.12751e+06	2.45258e+06	1.88689e+06	1.70793e+06	2.24719e+06	1.61394e+06	2.25028e+06	2.07022e+06	1.30085e+06	2.38497e+06	2.20173e+06	818532	2.23799e+06	1.94261e+06	1.82465e+06	1.81824e+06	1.73218e+06	2.23623e+06	2.32413e+06	1.03706e+06	2.17888e+06
M442T250_4	17-phenyl trinor PGF2alpha cyclopropyl methyl amide	442.3	250	441.288	9.94801	C27H39NO4	[M+H]+					1138395-10-4		BioDeepDB	1	pos	6.27458e+06	5.76565e+06	4.97219e+06	5.46057e+06	795168	6.15455e+06	2.05241e+06	7.10406e+06	7.70106e+06	8.97522e+06	763128	7.37055e+06	2.46359e+06	5.95305e+06	5.80184e+06	1.44174e+06	7.55769e+06	932728	9.61852e+06	8.24563e+06	1.30667e+06	3.71003e+06	7.01215e+06	992894
M441T678	Oleic Acid-2,6-diisopropylanilide	441.395	677.8	441.397	3.77271	C30H51NO	[M]+					140112-65-8		BioDeepDB	1	pos	400308	327794	290510	220608	254297	282525	142038	200021	252548	159411	319206	294395	313420	205138	206983	279140	8.05482e+06	6.59233e+06	4.98885e+06	5.77268e+06	1.88466e+06	2.18843e+06	7.21322e+06	7.13381e+06
M460T367	Lankacidin C	460.228	367.4	459.226	11.0293	C25H33NO7	[M+H]+			C15758		23623-31-6		BioDeepDB	1	pos	181684	198127	223061	169526	191713	241124	234532	197050	221979	234791	239520	183523	191570	249624	223108	186617	230289	200937	199097	250930	196719	221424	218719	207931
M442T55_2	Boc-Pro-DVal(NMe)-Val-OMe	442.289	55.1	441.284	3.98381	C22H39N3O6	[M+H]+							BioDeepDB	1	pos	2.31678e+06	2.59677e+06	2.33368e+06	3.30703e+06	2.69415e+06	4.09005e+06	290948	1.07576e+06	2.32266e+06	2.38204e+06	348739	944928	1.57294e+06	2.09225e+06	426090	3.64819e+06	1.61933e+06	3.40124e+06	1.9657e+06	2.67935e+06	3.88637e+06	1.99342e+06	2.75033e+06	2.30388e+06
M443T48_1	Barbamide	443.044	48.3	460.055	7.59744	C20H23Cl3N2O2S	[M+H-H2O]+			C15693				BioDeepDB	1	pos	799600	187964	1.19111e+06	1.3701e+06	638930	1.46428e+06	1.13963e+06	1.09734e+06	591470	909176	1.6989e+06	1.25148e+06	1.23305e+06	936454	449205	1.5936e+06	1.05321e+06	872489	2.4344e+06	1.04235e+06	1.28476e+06	1.27216e+06	231297	511040
M443T563	16-phenoxy tetranor PGF2alpha cyclopropyl methyl amide	443.28	563.4	443.267	18.0412	C26H37NO5	[M-H2O+NH4]+							BioDeepDB	1	pos	1.30136e+06	843947	1.2552e+06	863733	1.26457e+06	1.06562e+06	896071	975643	668607	624290	700010	520231	307897	304406	285563	198779	1.04847e+06	862825	975832	799354	420027	357938	317231	469633
M444T310_1	STROPHANTHIDIN SEMICARBAZIDE	444.254	310.2	461.253	19.2416	C24H35N3O6	[M+H-H2O]+							BioDeepDB	1	pos	3.0954e+07	5.87781e+06	3.63647e+07	5.30206e+06	9.16181e+07	4.76736e+06	8.00996e+07	1.82603e+06	7.06535e+06	1.41243e+08	2.06224e+06	2.15623e+06	6.16101e+06	2.35815e+06	3.53868e+06	9.49892e+06	1.49279e+07	1.21178e+06	5.73179e+06	3.05262e+07	999293	7.14491e+06	4.78694e+07	1.0535e+08
M444T310_2	AL 8810 isopropyl ester	444.266	310.2	444.268	2.89889	C27H37FO4	[M]+					208114-93-6		BioDeepDB	1	pos	5.29809e+07	6.1339e+07	8.56062e+07	5.29016e+07	7.10119e+07	6.24574e+07	1.09664e+08	6.65124e+07	5.54449e+07	6.43112e+07	8.45216e+07	5.67408e+07	6.01527e+07	4.89296e+07	4.82013e+07	8.0775e+07	5.66246e+07	5.65501e+07	6.4649e+07	5.73581e+07	6.64886e+07	4.63246e+07	7.38655e+07	6.99686e+07
M446T48	H-89	446.052	48.4	445.046	2.24189	C20H20BrN3O2S	[M+H]+					127243-85-0		BioDeepDB	1	pos	56122.9	79706.9	94950.4	128818	38138.6	23233.7	106827	80198.2	98851.2	100415	153329	87810.3	53014.7	70902.3	114215	78068.1	41528.8	44448.1	49968.6	48345.5	73584.3	67098.8	50909.9	47508.7
M447T296_2	Fluazinam	446.953	296.2	463.951	19.3175	C13H4Cl2F6N4O4	[M+H-H2O]+			C18578		79622-59-6		BioDeepDB	1	pos	167395	43308	46832.6	37101	46611.2	37533.2	51886.1	22715.2	196379	147935	222986	32588.7	150893	30797.2	30848.2	17264.5	247963	208037	147408	194734	237699	184490	18711.5	116822
M452T318	Tumonoic Acid G	452.296	318.2	469.304	0.704704	C25H43NO7	[M+H-H2O]+							BioDeepDB	1	pos	85221.5	74469.2	71892.4	70224.9	155174	130041	90921.5	109889	108479	117423	109396	66802.4	84796.8	95213.2	82131.8	62467.9	164504	127557	161313	108035	92982	110153	116890	119494
M453T637	CE(5_0)	453.396	636.9	470.412	20.1744	C32H54O2	[M+H-H2O]+	Steroids and steroid derivatives	Steroid esters	C02530	Lipid metabolism; Digestive system; Endocrine system	7726-03-6	HMDB0003442	BioDeepDB	1	pos	3.46679e+06	1.18612e+07	5.96336e+06	7.74207e+06	1.45198e+07	3.02509e+06	348221	8.1693e+06	1.29565e+07	6.93153e+06	1.58676e+07	3.36472e+06	8.25923e+06	3.17232e+06	9.40295e+06	9.28051e+06	8.14121e+06	3.22685e+06	1.1659e+07	7.07691e+06	8.00174e+06	1.16863e+07	8.9687e+06	1.16885e+06
M471T453_2	Terfenadine	471.307	453.4	471.314	13.5793	C32H41NO2	[M]+	Benzene and substituted derivatives	Diphenylmethanes	C07463		50679-08-8	HMDB0014486	BioDeepDB	1	pos	172796	127793	523923	43987.1	25237.5	27827	500859	18176	15714.4	66493.7	22714.8	15768.2	20226	7643.39	12389.1	6739.94	2.54571e+06	4.88096e+06	759989	671825	394658	490980	610581	1.33652e+06
M475T547	(S)-MG132	475.305	546.8	475.305	1.00685	C26H41N3O5	[M]+					133407-82-6		BioDeepDB	1	pos	401350	189112	419950	547353	59048.5	86923.6	21602.8	14263.9	792324	750512	1.20821e+06	810696	12261.1	6999.12	277629	161746	1.09934e+06	1.75539e+06	726551	1.76726e+06	1.11401e+06	158355	243039	965868
M460T464_3	BW A868C	460.282	464.2	459.273	2.38984	C25H37N3O5	[M+H]+					118675-50-6		BioDeepDB	1	pos	3.30832e+07	3.92185e+07	1.41018e+07	2.6965e+07	3.87026e+07	3.973e+07	2.10404e+07	2.93087e+07	2.95306e+07	2.28704e+07	5.80934e+07	2.16821e+07	2.56935e+07	2.25558e+07	2.82698e+07	2.38188e+07	2.98022e+07	3.03559e+07	1.45839e+07	2.50113e+07	2.26669e+07	2.41499e+07	1.77459e+07	2.04447e+07
M460T598_2	Oleyloxyethyl Phosphorylcholine	460.348	597.5	477.358	5.37917	C25H52NO5P	[M+H-H2O]+					84601-19-4		BioDeepDB	1	pos	7.39783e+06	6.03107e+06	6.78485e+06	6.88903e+06	3.36619e+06	4.31572e+06	1.05876e+06	4.34974e+06	2.45742e+06	2.92571e+06	3.14194e+06	834225	7.22849e+06	8.53012e+06	7.90843e+06	8.07689e+06	971427	1.02642e+06	1.13038e+06	1.1245e+06	2.16068e+07	1.51006e+07	2.00509e+07	2.53977e+07
M464T449	Lyso-PAF C-16	464.346	449.1	481.353	0.921295	C24H52NO6P	[M+H-H2O]+					52691-62-0		BioDeepDB	1	pos	236810	281338	48929.2	317034	221627	262930	70843.3	329086	183245	233878	84913.5	45300	313879	268018	267647	330212	231369	180590	277544	226191	337517	222534	61501.6	317882
M473T464	Jamaicamide C	473.262	464.2	490.26	20.7792	C27H39ClN2O4	[M+H-H2O]+			C18214				BioDeepDB	1	pos	2.60047e+07	6.9402e+06	3.17998e+06	1.66775e+06	2.88858e+06	4.4748e+06	679167	524641	2422.21	6930.2	2333.69	2486.24	2506.9	3996.18	3931.53	837159	14265.3	13081.9	11959.5	16043.1	2.82076e+06	4070.85	8832.08	7221.04
M474T523	DL-PPMP	474.383	522.5	474.382	1.00552	C29H50N2O3	[M]+							BioDeepDB	1	pos	1.33024e+06	2.17414e+06	1.88825e+06	2.45226e+06	2.43049e+06	1.71153e+06	578618	794287	2.01923e+06	1.75965e+06	1.78635e+06	2.35691e+06	2.00579e+06	1.83589e+06	1.79068e+06	1.75555e+06	1.54825e+06	1.81693e+06	677262	1.2144e+06	720130	802512	253987	240555
M482T293	HEPC	482.305	293	481.299	2.60679	C23H48NO5PS	[M+H]+					60793-01-3		BioDeepDB	1	pos	21324.5	44207.7	29953.7	24377	31182.2	35651.9	24012.2	32184	38738.5	5919.58	46408.2	24305	34659.6	25696.9	23409.1	28975.7	22678.7	22251.2	17828.9	31641.6	21821.5	33174.1	15870.6	42996.5
M502T480	Fexofenadine	502.293	480.3	501.288	5.32757	C32H39NO4	[M+H]+	Benzene and substituted derivatives	Diphenylmethanes	C06999	Digestive system	83799-24-0	HMDB0005030	BioDeepDB	1	pos	194365	215194	585178	420623	190071	265053	258587	297101	390639	310572	475748	255891	422605	192992	291326	104198	347524	154715	44938.4	306275	314306	10857.7	113072	221806
M486T54_1	UNC0224	486.355	53.7	485.348	0	C26H43N7O2	[M+H]+					1197196-48-7		BioDeepDB	1	pos	5.57003e+06	4.59434e+06	4.60302e+06	5.47757e+06	3.86675e+06	3.84291e+06	4.00168e+06	4.25265e+06	3.46155e+06	3.22549e+06	3.158e+06	2.73016e+06	625582	2.66198e+06	2.58945e+06	650455	1.8683e+07	1.99076e+07	1.71249e+07	1.98076e+07	4.84345e+06	4.45682e+06	3.78957e+06	6.1155e+06
M487T619	cholesteryl hemisuccinate	487.365	619.5	486.371	25.597	C31H50O4	[M+H]+					1510-21-0		BioDeepDB	1	pos	3.82921e+06	8.02537e+06	1.02375e+07	6.15053e+06	5.77356e+06	5.83021e+06	4.54687e+06	3.58397e+06	3.91041e+06	3.76336e+06	1.49521e+07	1.0265e+07	5.02072e+06	9.81252e+06	1.20603e+07	4.66293e+06	4.91412e+06	3.8296e+06	1.06382e+07	3.32497e+06	8.7797e+06	1.07603e+07	3.07941e+06	3.237e+06
M496T650_2	34_6(16Z,19Z,22Z,25Z,28Z,31Z)	496.431	650	496.428	5.17487	C34H56O2	[M]+					105528-06-1		BioDeepDB	1	pos	3.21718e+07	1.97882e+07	3.13012e+07	3.7799e+07	3.47359e+07	3.83567e+07	1.71645e+06	1.87545e+07	3.83507e+07	2.74391e+07	2.74454e+07	3.07319e+07	3.28455e+07	2.9066e+07	3.21854e+07	2.29669e+07	3.02923e+07	2.80652e+07	1.89262e+07	2.0421e+07	3.3246e+07	2.65759e+07	205246	1.27195e+07
M497T385	Glaucarubin	497.252	385.1	496.231	28.203	C25H36O10	[M+H]+	Prenol lipids	Terpene lactones	C08760		1448-23-3	HMDB0035626	BioDeepDB	1	pos	2.11441e+06	422970	564412	510535	544238	731008	186874	297286	1637.98	181674	268582	151717	70133.8	92370.4	97290.8	91492.4	2383.27	35785	1445.24	6993.86	228934	161466	3981.94	9893.94
M516T610	UNC0321	516.371	610.5	515.358	10.2639	C27H45N7O3	[M+H]+							BioDeepDB	1	pos	6.69091e+07	4.98722e+07	5.05534e+07	4.54594e+07	3.01847e+07	3.88635e+07	3.10247e+07	2.45219e+07	6.05894e+07	8.30184e+07	6.05448e+07	4.52538e+07	3.82002e+07	1.09994e+07	2.08152e+07	1.07924e+07	1.1417e+07	1.9431e+07	7.96404e+07	1.89848e+07	7.9421e+06	1.08057e+07	202829	1.94119e+07
M505T494	Taxusin	505.283	494.2	504.272	5.98477	C28H40O8	[M+H]+			C20152		19605-80-2		BioDeepDB	1	pos	183853	486089	320039	240446	234240	305792	227049	259144	401902	262056	403436	213953	403213	295135	211812	418957	224431	225670	239868	242152	220579	199045	184666	260833
M505T48_3	1-Kestose	505.19	48.2	504.169	28.1557	C18H32O16	[M+H]+	Organooxygen compounds	Carbohydrates and carbohydrate conjugates	C03661		470-69-9	HMDB0011729	BioDeepDB	1	pos	739201	1.16546e+06	519385	410692	954368	1.32573e+06	760156	740433	1.23047e+06	535978	1.07553e+06	723866	1.1005e+06	984336	666546	1.2149e+06	617328	509101	688323	647809	609038	538050	501307	745257
M513T394_1	11-KETOROCKOGENIN ACETATE	513.317	393.9	530.324	0.351027	C31H46O7	[M+H-H2O]+							BioDeepDB	1	pos	138959	5332.26	7078.14	88607	115367	105294	61503.5	57823.5	10329.3	70936.8	81382.1	56462.1	74323.6	79968.7	19345.2	114103	147584	7343.81	197520	216151	157395	13285.6	54833.8	57979.1
M514T464	MK 571	514.128	463.9	514.115	16.385	C26H27ClN2O3S2	[M-H2O+NH4]+			C11239		115104-28-4/NA		BioDeepDB	1	pos	79821.1	88185.4	118338	98133.4	178449	149021	95747.1	113519	153034	114310	155257	100393	126590	107897	142758	83637	127557	79982.6	94185.6	56249.6	107722	114359	69680.9	116344
M519T552	(-)-Gossypol	519.214	551.9	518.194	24.5063	C30H30O8	[M+H]+	Prenol lipids	Sesquiterpenoids	C07667	Chemical structure transformation maps; Global and overview maps; Metabolism of terpenoids and polyketides	90141-22-3/303-45-7	HMDB0040723	BioDeepDB	1	pos	431590	331023	320034	164390	215221	212154	159393	222733	586122	7.5389e+06	3.5998e+06	603532	3.23558e+06	286856	1.36055e+06	237833	197642	244915	315857	211887	166780	207451	140515	153422
M520T271	Linoleic Acid-biotin	520.345	270.6	520.345	0.745444	C28H48N4O3S	[M]+							BioDeepDB	1	pos	422799	161012	828303	122021	750002	851792	1.05832e+06	366602	29418.7	465082	203106	793164	440691	55419.6	1.06219e+06	692073	636683	122359	181686	621029	118850	790858	852760	181902
M521T54_2	Bellericagenin B; (2?,3?,5?,9?,18?,19?)-2,3,19,23,24-Pentahydroxyolean-12-en-28-oic acid	521.341	53.7	520.34	12.5864	C30H48O7	[M+H]+							BioDeepDB	1	pos	921031	958608	1.08639e+06	1.3294e+06	4.50409e+06	4.42895e+06	4.62936e+06	3.23166e+06	3.15922e+06	2.28159e+06	3.2406e+06	2.97558e+06	5.31472e+06	4.93113e+06	4.62391e+06	3.20065e+06	4.56369e+06	3.6607e+06	4.62094e+06	3.3464e+06	6.04956e+06	8.03081e+06	4.92096e+06	6.3582e+06
M523T636	KRP 203-phosphate	523.113	635.6	523.099	11.3675	C24H27ClNO6PS	[M-H2O+NH4]+							BioDeepDB	1	pos	4.45967e+06	2.35582e+06	1.75061e+06	3.04883e+06	5.86037e+06	3.50468e+06	72455	3.03842e+06	1.70987e+06	4.0715e+06	2.20229e+06	2.95315e+06	3.72354e+06	2.87508e+06	1.8502e+06	7.61665e+06	2.75741e+06	4.79154e+06	7.39892e+06	6.46207e+06	4.49451e+06	7.32752e+06	1.83752e+06	3.49718e+06
M541T610	Leptomycin B	541.353	610.5	540.345	0.152463	C33H48O6	[M+H]+					87081-35-4		BioDeepDB	1	pos	4.59287e+06	2.23713e+06	1.98413e+07	1.98221e+06	8.04253e+06	7.7846e+06	6.01061e+06	5.91524e+06	3.71224e+06	3.18893e+07	4.57971e+06	2.93849e+07	5.29941e+06	6.07937e+06	5.86567e+06	1.49277e+07	4.45776e+07	5.17739e+07	3.82222e+07	1.69695e+07	2.59594e+07	2.36296e+07	3.33286e+06	9.71218e+06
M526T479	Isodesmosine	526.292	479.4	525.28	9.07215	C24H39N5O8	[M+H]+						HMDB00739	BioDeepDB	1	pos	495994	15663.4	16790.6	28798.5	21990.3	359897	235031	18783.4	155138	16243.2	131630	126209	18928.8	436946	15159.3	13753.7	251348	105111	129640	348428	304700	17987.3	6335.84	14040.4
M528T445_1	Indoxacarb	528.094	445.3	527.071	29.9189	C22H17ClF3N3O7	[M+H]+			C18569		173584-44-6		BioDeepDB	1	pos	324791	190168	135531	212804	353944	299785	130972	216382	365020	186015	322056	306682	282326	227168	360872	227681	211309	92690.4	298252	171468	241960	91236.2	193630	102565
M530T675_1	4a,7b-Dihydroxy-3-(hydroxymethyl)-1,1,6,8-tetramethyl-5-oxo-1,1a,1b,4,4a,5,7a,7b,8,9-decahydro-9aH-cyclopropa[3,4]benzo[1,2-e]azulen-9a-yl laurate	530.374	674.6	530.361	13.6583	C32H50O6	[M-H2O+NH4]+							BioDeepDB	1	pos	9.85259e+06	3.26848e+06	1.86846e+07	8.09248e+06	1.34683e+07	3.22471e+07	5.28885e+07	763022	122132	2.74512e+07	1.04188e+07	2.20242e+07	7.32843e+06	442735	7.66002e+07	3.47257e+07	3.47302e+07	5.55076e+06	3.80557e+06	2.7281e+07	609502	3.81272e+07	2.14404e+07	1.31121e+07
M549T555_4	1-O-(cis-9-Octadecenyl)-2-O-acetyl-sn-glycero-3-phosphocholine	549.369	554.6	549.379	18.6024	C28H56NO7P	[M]+					86288-90-1		BioDeepDB	1	pos	787946	487871	653121	337238	6.33255e+06	6.10415e+06	2.52173e+06	992640	4.63791e+06	474555	4.62327e+06	378689	2.20888e+06	2.10445e+06	1.36932e+06	410372	9.58075e+06	953919	954723	624156	357796	265140	3.99404e+06	4.31078e+06
M545T529	(2S,5R,8S)-2-[(Benzoyloxy)methyl]-3-(?-D-glucopyranosyloxy)-8-methyl-9,10-dioxatetracyclo[4.3.1.02,5.03,8]decane-6-sulfonic acid	545.131	529.1	544.125	2.0762	C23H28O13S	[M+H]+							BioDeepDB	1	pos	703260	553396	622999	588734	361575	375392	307259	365969	236493	201865	228450	238302	516251	447514	381573	313185	128087	179009	292517	271487	301600	576914	579955	761632
M546T505_2	CHAETOCHROMIN	546.153	505	546.153	0.177701	C30H26O10	[M]+							BioDeepDB	1	pos	2.006e+07	3.09442e+07	1.95867e+07	3.41068e+07	3.51556e+07	3.6661e+07	5.21931e+07	5.01604e+07	1.68297e+07	6.38394e+07	2.93317e+07	5.09753e+07	2.37374e+07	7.66504e+07	6.5756e+07	2.32416e+07	2.63882e+07	2.26206e+07	3.43087e+07	1.85423e+07	1.25056e+08	3.98487e+07	1.53994e+08	1.23606e+08
M548T53_1	Antillatoxin B (red color)	548.35	53.4	565.352	11.0557	C33H47N3O5	[M+H-H2O]+							BioDeepDB	1	pos	2.23064e+06	131349	3.46417e+06	3.4101e+06	998802	8.54441e+06	1.43869e+07	111373	345667	2.89378e+06	723243	9.58863e+06	629993	71204	1.06238e+07	9.40774e+06	6.55227e+06	2.2441e+06	264878	3.52148e+06	46416	3.47422e+06	5.48411e+06	2.06351e+06
M548T513	1,2-Didecanoyl PC	548.381	512.9	565.374	15.593	C28H56NO8P	[M+H-H2O]+					3436-44-0		BioDeepDB	1	pos	1.10737e+06	593589	641418	952564	242724	95394.8	89160.4	255066	1.03272e+06	1.14544e+06	1.17085e+06	1.14423e+06	94141.3	22466.1	27613.1	12878.7	260011	250663	348155	230613	36481.5	47757.7	10905.5	32406.4
M551T575	Leukotriene F4	551.285	575.5	568.282	19.6523	C28H44N2O8S	[M+H-H2O]+	Fatty Acyls	Eicosanoids	C06462	Lipid metabolism; Global and overview maps	83851-42-7	HMDB0006465	BioDeepDB	1	pos	5.81104e+06	5.77852e+06	5.31954e+06	5.64622e+06	4.26068e+06	4.04121e+06	4.90568e+06	4.14863e+06	3.11546e+06	3.7693e+06	4.31484e+06	2.8901e+06	1.45488e+06	2.05939e+06	1.28523e+06	1.49802e+06	6.48627e+06	6.71091e+06	6.54482e+06	6.54807e+06	3.71127e+06	3.23671e+06	5.86748e+06	2.0808e+06
M555T548_2	TG(10_0_10_0_10_0)	555.452	548.4	554.455	17.132	C33H62O6	[M+H]+					621-71-6	HMDB00548	BioDeepDB	1	pos	3.10454e+06	2.42838e+06	2.12335e+07	4.81438e+06	1.60572e+07	6.03002e+06	3.44031e+06	1.569e+06	1.13392e+07	6.41853e+06	1.09613e+07	6.35701e+06	1.18192e+07	5.37892e+06	3.30275e+07	1.82624e+07	1.25118e+07	8.71439e+06	1.51977e+07	2.72621e+07	1.70732e+07	3.10988e+07	170149	1.43304e+06
M562T588_2	Hexanolamino PAF C-16	562.409	587.7	579.426	18.2356	C30H62NO7P	[M+H-H2O]+					137566-83-7		BioDeepDB	1	pos	2.63255e+06	1.82649e+06	1.5688e+06	2.23429e+06	1.62739e+06	1.50396e+06	1.47843e+06	1.16119e+06	1.13587e+06	1.6209e+06	523579	1.12003e+06	1.64146e+06	1.7312e+06	887146	1.66148e+06	1.13533e+06	719282	1.68218e+06	800396	1.81277e+06	3.22705e+06	5.53035e+06	2.85635e+06
M568T619_1	Montelukast	568.19	618.8	585.21	22.9958	C35H36ClNO3S	[M+H-H2O]+	Linear 1,3-diarylpropanoids		C07482		158966-92-8/151767-02-1	HMDB0014614	BioDeepDB	1	pos	4.76632e+06	1.74629e+06	1.97388e+06	1.07806e+06	1.53261e+06	4.57679e+06	755311	1.94116e+06	2.06444e+06	2.17616e+06	5.26842e+06	2.0311e+06	2.25361e+06	2.67373e+06	2.55551e+06	1.72079e+06	3.22254e+06	1.77117e+06	1.23258e+06	1.75219e+06	2.03158e+06	1.80891e+06	1.92462e+06	1.23446e+06
M571T445_1	PKC 412	571.23	444.8	570.227	6.26974	C35H30N4O4	[M+H]+					120685-11-2		BioDeepDB	1	pos	1.06528e+06	659285	1.94231e+06	165266	3.36215e+06	762329	4.25982e+06	552321	1.19269e+06	1.15536e+06	799501	462219	150136	75812	270948	172478	2.67717e+06	496903	673037	781845	13225.2	771002	1.63721e+06	3.81214e+06
M571T617_1	Zeaxanthin	571.456	616.8	568.428	9.27455	C40H56O2	[M+H]+			C06098	Chemical structure transformation maps; Biosynthesis of other secondary metabolites; Global and overview maps; Metabolism of terpenoids and polyketides	144-68-3		BioDeepDB	1	pos	1.71589e+07	2.55472e+06	1.61938e+07	1.0752e+07	7.66734e+06	1.35036e+07	1.10099e+07	1.31368e+07	2.83683e+06	1.05594e+07	5.2151e+06	1.12343e+07	5.0986e+06	7.29647e+06	3.87834e+06	6.8407e+06	1.96558e+07	1.61173e+07	1.29063e+07	8.63457e+06	7.12042e+06	1.19983e+07	1.23952e+07	1.24646e+07
M572T477_2	CAY10633	572.252	476.9	589.268	14.2127	C34H39NO8	[M+H-H2O]+					712313-33-2		BioDeepDB	1	pos	229511	187019	356973	392314	230515	458547	179222	398451	175494	140836	280626	240427	266488	184332	160497	252156	255463	176375	334578	217187	185245	338068	215677	348577
M581T549_2	Streptomycin	581.282	549.5	581.266	7.61076	C21H39N7O12	[M-H2O+NH4]+	Organooxygen compounds	Carbohydrates and carbohydrate conjugates	C00413	Biosynthesis of other secondary metabolites; Global and overview maps	57-92-1	HMDB0015214	BioDeepDB	1	pos	1.38058e+06	1.08257e+06	804317	604645	945438	350691	107400	4.62631e+06	1.61464e+06	2.26532e+06	1.07151e+06	703907	616453	595723	386811	90686.8	309293	352471	593920	1.02672e+06	923965	306352	752212	10642.8
M586T558_1	12-Deoxyphorbol 13-palmitate; (1aR,1bS,4aR,7bR,8R,9aS)-4a,7b-Dihydroxy-3-(hydroxymethyl)-1,1,6,8-tetramethyl-5-oxo-1,1a,1b,4,4a,5,7a,7b,8,9-decahydro-9aH-cyclopropa[3,4]benzo[1,2-e]azulen-9a-yl palmitate	586.44	558.1	586.423	7.40195	C36H58O6	[M-H2O+NH4]+							BioDeepDB	1	pos	710597	668723	725076	398282	484969	399860	1.79608e+06	615975	1.2285e+06	806843	970338	510761	1.18062e+06	956821	776783	1.89647e+06	675095	489224	1.06328e+06	979000	955809	491050	279437	498166
M592T437_2	A2E	592.444	437.4	591.444	11.801	C42H57NO	[M+H]+							BioDeepDB	1	pos	495050	287955	528164	168995	149128	332154	76179.5	130860	317117	207942	203376	127504	217303	113531	128569	258230	94434	266844	68621.5	263052	119703	111622	93971.6	51236.5
M592T672_1	DEPMPO-biotin	592.259	672.4	591.249	3.46716	C24H42N5O8PS	[M+H]+					936224-52-1		BioDeepDB	1	pos	7.30233e+07	1.10147e+07	2.11582e+07	8.45884e+07	3.10132e+07	1.63559e+07	1.21813e+07	2.1852e+07	1.09403e+07	1.2941e+06	5.34961e+06	4.01684e+06	3.28989e+06	3.10087e+06	8.95862e+06	2.4878e+07	6.88943e+06	1.12111e+07	7.4195e+06	3.41359e+06	1.79183e+06	1.76235e+06	5.48169e+06	904162
M592T304	PGPC	592.366	303.9	609.364	14.9409	C29H56NO10P	[M+H-H2O]+					89947-79-5		BioDeepDB	1	pos	670872	241662	478909	133792	905059	197395	858046	197003	275077	474234	215621	218694	167795	69451.5	172180	232804	917583	191646	136076	382850	142632	205590	557038	315160
M593T308	U-74389G	593.402	307.6	610.4	16.3618	C37H50N6O2	[M+H-H2O]+					153190-29-5		BioDeepDB	1	pos	10202.6	6614.63	27794	12895.2	17953.9	20381.2	28945.7	12092.5	8336.57	4407.96	3029.48	5654.89	3964.07	1975.58	5166.01	2422.03	19661.7	15127	18818.9	9539.26	3637.98	3589.03	19398.4	13871.4
M594T641_1	(+)-Bebeerine	594.275	640.9	594.273	3.87026	C36H38N2O6	[M]+			C09352		477-60-1/436-05-5		BioDeepDB	1	pos	2.44487e+07	4.98509e+06	2.2129e+07	2.13188e+07	1.07363e+07	3.17108e+07	4.42666e+07	1.61492e+07	5.93325e+06	5.70982e+06	1.83619e+06	4.56605e+06	1.86901e+06	1.52352e+06	6.14036e+06	5.95142e+06	1.86482e+07	7.03705e+07	1.77004e+07	1.57593e+07	700718	5.40731e+06	5.49122e+07	3.67146e+07
M622T48_2	CALCEIN	622.162	47.9	622.143	4.03897	C30H26N2O13	[M-H2O+NH4]+					1461-15-0		BioDeepDB	1	pos	522094	6.76924e+07	1.14686e+06	68735.6	724370	1.42697e+06	2.70407e+06	37658.6	12145.4	1.40285e+06	62828.9	2.44324e+06	48209.7	7280.81	1.11513e+06	1.74494e+06	358995	18860.3	20623.8	2.1079e+06	15932.8	1.99928e+06	1.52453e+06	89230.8
M606T262_2	Apicidin	606.353	261.8	623.368	12.9468	C34H49N5O6	[M+H-H2O]+					183506-66-3		BioDeepDB	1	pos	208668	97908.4	84578.7	155035	226479	212819	60549.4	91024.5	91752.6	48908.7	309988	111513	33035.4	146970	130322	43445.8	175467	69525.1	75856.1	98128	103487	89322.8	74583.8	99748.4
M608T464	Boc-Phe(NMe)-Pro-Phe(NMe)-Gly-OMe	608.321	464	608.321	0.164745	C33H44N4O7	[M]+							BioDeepDB	1	pos	224430	262845	59289.3	456329	535320	469388	475397	603403	87235.4	495515	585845	176134	573662	249567	180567	117906	389847	493319	242541	112389	383435	426897	192049	122826
M608T280_1	Malyngamide J	608.38	279.9	607.372	1.13696	C33H53NO9	[M+H]+							BioDeepDB	1	pos	160896	174254	111332	13234.6	2949.44	282835	2377.72	72606.5	142074	149214	103548	693598	159258	242451	64200.5	27763.3	272971	353604	210296	223270	1.59614e+06	1.08015e+06	1.46708e+06	2.32012e+06
M627T284_1	Somocystinamide A byproduct	627.398	283.9	626.39	0.759097	C32H58N4O4S2	[M+H]+							BioDeepDB	1	pos	3.63016e+06	656491	899473	2.06333e+06	3.82785e+06	1.0606e+06	1.16855e+06	1.81711e+06	4.40866e+06	2.25949e+06	5.7069e+06	1.09673e+06	2.01153e+06	2.9142e+06	1.94654e+06	1.56785e+06	2.11057e+06	1.52761e+06	1.90076e+06	761129	2.25078e+06	1.71022e+06	1.07084e+06	2.05585e+06
M615T381_2	16,16-dimethyl Prostaglandin E2 p-(p-acetamidobenzamido) phenyl ester	615.334	381	632.346	7.34219	C37H48N2O7	[M+H-H2O]+					62873-55-6		BioDeepDB	1	pos	2.83264e+06	4.83525e+06	3.36976e+06	4.07793e+06	388772	317782	396896	851097	424371	443335	437580	344256	1428.39	317384	1692.32	259639	1.52633e+06	2.73391e+06	1.39702e+06	1.28274e+06	1603.76	506523	729452	923822
M616T681_2	3'-Sialyllactose	616.192	680.8	633.212	20.4386	C23H39NO19	[M+H-H2O]+	Organooxygen compounds	Carbohydrates and carbohydrate conjugates			35890-38-1	HMDB0000825	BioDeepDB	1	pos	102188	77901.7	69991.1	411014	436490	111906	469429	64001.2	418699	89757.9	332605	60778	402091	382570	356692	90400.3	267353	81085.4	72256.5	56427.2	294565	55463.6	26426.4	62916
M623T683_3	(+)-Tetrandrine	623.314	682.5	622.304	4.01082	C38H42N2O6	[M+H]+			C09654	Chemical structure transformation maps	518-34-3		BioDeepDB	1	pos	3.34669e+06	4.14009e+06	4.25094e+06	3.16643e+06	7.9869e+06	3.71393e+06	2.04704e+06	7.03942e+06	4.93818e+06	5.48755e+06	2.31474e+06	3.43154e+06	4.7219e+06	4.35302e+06	4.98979e+06	2.47848e+06	9.88208e+06	6.36123e+06	9.13277e+06	8.44572e+06	3.72442e+06	2.9588e+06	6.48282e+06	4.86831e+06
M625T683	CAY10626	625.285	682.6	624.278	0.476008	C31H35F3N8O3	[M+H]+					1202884-94-3		BioDeepDB	1	pos	304802	116436	1.01552e+06	432648	1.19494e+06	1.15995e+06	259266	283718	967688	195791	435014	927047	1.15339e+06	592034	704113	1.05082e+06	1.22355e+06	163705	929356	246441	82136.3	1.15409e+06	115943	134969
M629T284_1	Prostaglandin A1-biotin	629.406	283.9	646.413	1.65604	C35H58N4O5S	[M+H-H2O]+							BioDeepDB	1	pos	1.09455e+06	569099	580393	441611	930493	529512	443261	470880	229819	451936	1.08642e+06	469887	484826	693447	249757	556385	158932	267220	689228	361761	391164	141189	413174	315066
M630T439_2	DIHYDROGAMBOGIC ACID	630.314	439.1	630.319	8.19977	C38H46O8	[M]+							BioDeepDB	1	pos	64298.3	77810.3	150171	76508.5	36680.2	193157	100042	102791	104617	95398	140980	59168.1	62315.1	87181.4	59953.6	69934.1	93701.4	22860.3	93330.1	75798.1	85559.4	78680.4	38708.2	50556.4
M631T472	Cytotrienin A	631.335	472.3	648.341	2.79963	C37H48N2O8	[M+H-H2O]+					189010-85-3		BioDeepDB	1	pos	207946	218505	81271.9	39698	107339	27910.8	97273.5	25005.1	23542.3	145971	130397	22839.7	112996	77468.7	95648.9	18207.2	188296	172352	153372	240165	111422	192360	80822.8	157330
M634T378	Azelaoyl PAF	634.439	377.6	651.448	1.23767	C33H66NO9P	[M+H-H2O]+							BioDeepDB	1	pos	8530.13	25877.5	23246.3	4574.28	482.715	168.317	936.655	1304.79	40113.2	10298.3	38248.6	3533.8	1343.56	1019.13	1929.92	11483.7	50538.4	30528	33969.7	15042.5	12202.1	35968.1	4630.4	31111.9
M639T555	Teniposide	639.14	554.7	656.156	14.1847	C32H32O13S	[M+H-H2O]+	Lignan lactones	Podophyllotoxins	C11153		29767-20-2	HMDB0014587	BioDeepDB	1	pos	626006	333740	468164	317076	52572.5	29624.1	32107.1	1.11468e+06	511711	224591	486935	307081	504628	214044	328137	67153.1	365540	392227	484055	434410	304512	524748	899064	2.20612e+06
M640T264_1	Moxidectin	640.393	263.6	639.377	12.6485	C37H53NO8	[M+H]+					113507-06-5		BioDeepDB	1	pos	27825.1	27501.2	47576	20144.2	151644	171850	22696.5	33431	1.94526e+07	1.5588e+06	2.18799e+06	2.44383e+06	4.4638e+06	1.27952e+06	897708	1.26292e+06	26144.1	43305.4	7636.71	4451.35	9270.93	137191	1.88243e+06	1.8211e+06
M642T302_2	C-12 NBD Ceramide	642.455	301.8	659.462	0.35271	C36H61N5O6	[M+H-H2O]+					202850-01-9		BioDeepDB	1	pos	1.06377e+06	456654	474245	968520	837963	1.25844e+06	670546	1.76813e+06	1.18829e+06	648079	78253.5	586021	479100	879545	691301	131435	609612	1.43363e+06	725849	924493	569257	566965	421548	695293
M644T252_1	8-iso Prostaglandin A2-biotin	644.395	251.5	644.397	2.70271	C35H56N4O5S	[M]+							BioDeepDB	1	pos	270785	14772.6	500564	61484.3	69396.8	456090	504125	21809.7	7477.33	305003	51933.1	1.15377e+06	27808.1	7671.98	595177	710427	267294	4058.33	8152.83	388409	7253.6	438079	384533	70668.5
M646T471_2	1-Palmitoyl-2-(5-keto-6-octenedioyl)-sn-glycero-3-phosphocholine	646.369	470.6	663.375	1.90913	C32H58NO11P	[M+H-H2O]+			C13900		439904-33-3		BioDeepDB	1	pos	563603	359674	592591	374952	552621	324135	342605	326304	299310	330148	332403	200226	479343	405617	294765	252412	897211	665538	751840	450350	235487	320701	177239	408236
M653T623_1	Fungichromin	653.38	622.9	670.393	8.67183	C35H58O12	[M+H-H2O]+			C13299		6834-98-6		BioDeepDB	1	pos	346892	643260	381825	1.14415e+06	1.25624e+06	522556	292283	473204	348075	374888	548734	429366	875291	309040	255652	692426	362903	269905	477923	261177	727095	330860	161855	381248
M672T302	Palmyramide A	672.403	301.9	671.378	26.0261	C36H53N3O9	[M+H]+							BioDeepDB	1	pos	74605.9	89343.1	34970.8	67743.8	95750.8	66238.3	76813.6	42432.9	51988.8	83893.3	20503.3	109207	94219.7	22693.5	47196.6	83785.7	62211.2	60325.4	78504.1	87393.7	24068.3	73217.6	104276	76845.3
M681T481_3	HEUDELOTTIN C	681.36	480.7	698.367	0.765311	C39H54O11	[M+H-H2O]+							BioDeepDB	1	pos	18800.7	12510	49641.2	34654.2	3894.75	3417.6	4054.61	2489.67	735288	265782	606426	235475	237888	411382	394661	202983	54645.3	35697.2	55868.3	45256.9	54429.1	7210.62	5533.77	19606.3
M702T48_1	Neu5Acalpha2-6Galbeta1-4Glcbeta-Sp	702.239	48.4	702.244	7.86795	C25H42N4O19	[M]+					615554-66-0		BioDeepDB	1	pos	511590	735192	878893	1.08517e+06	444911	418579	326088	421668	495963	610703	566545	410059	155622	144724	140720	121509	984986	776578	923013	1.71116e+06	131964	160820	72639.8	530884
M703T686	Carmabin A	703.447	686.5	703.431	7.40437	C40H57N5O6	[M-H2O+NH4]+							BioDeepDB	1	pos	1.23341e+07	8.84537e+06	4.6e+06	7.99018e+06	7.16924e+06	6.8823e+06	514921	1.23812e+07	3.16712e+06	6.42954e+06	6.24308e+06	6.31674e+06	7.33221e+06	1.16581e+07	5.02359e+06	3.22921e+07	7.86357e+06	4.17169e+06	7.85204e+06	9.15862e+06	2.55069e+07	1.07146e+07	992052	1.71083e+06
M687T48_1	Itraconazole	687.236	48.3	704.239	6.00499	C35H38Cl2N8O4	[M+H-H2O]+			C07060		84625-61-6		BioDeepDB	1	pos	1.75463e+06	704527	68647.7	7757.99	5084.96	47233.9	546990	162021	120154	2.52959e+06	1.91909e+06	1.61529e+06	2.56756e+06	5.7639e+06	829972	1.03369e+06	1.52335e+06	929622	1.0145e+06	2.22378e+06	2.65662e+06	1.05787e+06	394901	843940
M688T641	Dephospho-CoA	688.174	640.7	687.149	26.5921	C21H35N7O13P2S	[M+H]+	Purine nucleotides	Purine ribonucleotides	C00882	Metabolism of cofactors and vitamins; Global and overview maps	3633-59-8	HMDB0001373	BioDeepDB	1	pos	2.70018e+07	3.33084e+07	4.51236e+07	3.07998e+07	4.78885e+07	3.13403e+07	8.37414e+07	3.86524e+07	2.70349e+07	3.01951e+07	1.99489e+07	1.34232e+07	1.79419e+07	3.98046e+06	6.12056e+06	6.98041e+06	7.05603e+07	3.36746e+07	2.51091e+07	2.58495e+07	2.03161e+07	1.06612e+07	2.32352e+07	3.1926e+07
M688T630	N-Succinimidyl [tris(2,4,6-trimethoxyphenyl)phosphonio]acetate	688.207	629.7	688.216	12.7744	C33H39NO13P	[M]+					226409-58-1		BioDeepDB	1	pos	1.34116e+07	2.38458e+07	1.47545e+07	1.03596e+07	2.54273e+07	4.07799e+07	2.96017e+07	2.93984e+07	1.54313e+07	1.18159e+07	1.14956e+07	7.47897e+06	6.55465e+06	1.60809e+06	2.47271e+06	2.60237e+06	3.01589e+07	3.54246e+07	1.56544e+07	2.40505e+07	7.60786e+06	4.30634e+06	7.94495e+06	1.23579e+07
M690T624_2	Microcolin C	690.497	623.7	689.473	24.728	C37H63N5O7	[M+H]+							BioDeepDB	1	pos	2.34359e+07	1.93765e+07	3.44725e+07	3.87785e+07	8.4646e+07	6.47118e+07	8.916e+06	7.67179e+07	5.02053e+07	1.60923e+07	9.68575e+06	1.5343e+07	1.00834e+07	1.26878e+07	1.23696e+08	1.20829e+08	7.34762e+06	7.65467e+07	5.09389e+07	6.1846e+07	3.72087e+07	2.71272e+07	880227	1.64179e+07
M700T690_2	N-dodecanoyl-L-Homoserine lactone-3-hydrazone-fluorescein	700.242	689.6	700.257	21.3997	C37H40N4O8S	[M]+							BioDeepDB	1	pos	70313.8	208946	328105	188951	26006.4	11141.1	15434.3	11424.7	4.65765e+06	5.27529e+06	4.55355e+06	4.14061e+06	4.0542e+06	4.12427e+06	3.92163e+06	1.45509e+06	309802	212691	295109	216075	332105	70818.4	5213.16	195554
M702T48_2	Galalpha(1-3)[Fucalpha(1-2)]Galbeta(1-4)Glcbeta-Sp	702.253	48.4	719.26	0.844575	C26H45N3O20	[M+H-H2O]+							BioDeepDB	1	pos	3.6883e+06	4.20232e+06	2.61117e+06	5.04575e+06	4.74836e+06	8.97663e+06	3.89681e+06	3.44552e+06	6.62961e+06	5.61104e+06	3.93153e+06	6.62256e+06	8.15095e+06	4.69571e+06	1.51346e+07	2.47115e+06	7.85677e+06	4.14144e+06	6.81903e+06	5.90078e+06	2.1477e+06	1.10818e+06	3.09863e+06	2.16519e+06
M702T313_1	KDdiA-PC	702.427	312.6	719.437	4.57637	C36H66NO11P	[M+H-H2O]+					439904-34-4		BioDeepDB	1	pos	72553.5	24079.1	76588.2	80179.1	71824.8	48970.7	30323.2	444488	178587	48448.5	134293	160387	179780	210658	61831.7	124150	52759.3	109367	168394	183275	70073.5	199722	56503.5	33232.4
M703T675_5	Azadirachtin A	703.245	674.8	720.263	14.1714	C35H44O16	[M+H-H2O]+			C08748	Chemical structure transformation maps	11141-17-6		BioDeepDB	1	pos	1.07237e+07	5.57943e+06	7.09964e+06	1.00746e+07	1.42334e+06	4.28741e+06	1.24367e+06	3.43744e+06	850028	716357	618432	863314	3.05959e+06	2.86763e+06	2.64153e+06	2.74001e+06	4.99812e+06	3.06582e+06	4.51024e+06	5.05044e+06	4.8548e+06	2.47691e+06	3.60149e+06	4.82621e+06
M704T675_1	KN-62	704.197	675	721.203	2.78153	C38H35N5O6S2	[M+H-H2O]+					127191-97-3		BioDeepDB	1	pos	3.8087e+07	8.30878e+07	5.29679e+07	4.04374e+07	2.15728e+07	2.82864e+07	4.12041e+07	2.88716e+07	4.43459e+07	1.26051e+08	9.20112e+07	3.60227e+07	1.50219e+07	1.38115e+07	2.84832e+07	1.68505e+08	8.30469e+07	2.74624e+08	1.111e+08	1.34929e+08	2.68578e+07	5.38105e+07	3.9825e+07	6.50611e+07
M706T675_1	Valrubicin	706.204	675.1	723.214	3.01641	C34H36F3NO13	[M+H-H2O]+							BioDeepDB	1	pos	3.10048e+07	1.68355e+07	1.08154e+07	2.70469e+07	1.90779e+07	1.89399e+07	2.47222e+07	8.16711e+06	7.15467e+06	4.76479e+06	9.1446e+06	7.42094e+06	1.70219e+07	1.33361e+07	5.93948e+06	1.19525e+07	3.83927e+07	3.9175e+07	6.47301e+07	1.5465e+07	1.762e+07	1.18956e+07	1.69169e+07	1.62941e+07
M714T673_2	Spinosyn A	714.455	673.4	731.461	2.42702	C41H65NO10	[M+H-H2O]+			C11054		131929-60-7		BioDeepDB	1	pos	3.29945e+06	1.54291e+07	1.87273e+07	1.43622e+07	1.45297e+07	2.03426e+07	7.30398e+06	1.72932e+07	1.02677e+07	2.61706e+06	1.8923e+06	1.77039e+06	3.05277e+06	1.21793e+06	688298	630542	1.64364e+06	1.61256e+06	1.52204e+06	1.32794e+06	3.97781e+06	4.27063e+06	345930	313385
M728T295	Spinosyn D	728.463	294.7	745.476	8.05257	C42H67NO10	[M+H-H2O]+			C11056		131929-63-0		BioDeepDB	1	pos	1.10354e+06	1.00226e+06	1.4469e+06	447676	278229	349425	812599	255436	634450	654822	273214	749769	41870.6	40140.4	105256	145653	5.90669e+06	7.5385e+06	3.96703e+06	6.06547e+06	1.24372e+06	1.1246e+06	337376	280175
M744T479_1	Fucalpha1-2Galbeta1-4[Fucalpha1-3]GlcNAcbeta-Sp	744.305	478.7	744.291	9.94132	C28H48N4O19	[M-H2O+NH4]+							BioDeepDB	1	pos	268769	180208	42303.4	24960.2	57617.9	5390.46	50048.4	39342.1	35150.9	25629.8	371223	99782.8	409031	328011	328675	362906	417231	178551	1.07716e+06	850160	419069	227405	207440	224408
M751T511_3	Palmitoyl thio-PC	750.555	511.1	749.539	11.7247	C40H80NO7PS	[M+H]+					113881-60-0		BioDeepDB	1	pos	1.66145e+07	1.55118e+07	5.02905e+06	8.06096e+06	1.47049e+07	4.87151e+06	2.60677e+07	5.43172e+06	5.0343e+06	1.19252e+07	1.33021e+07	3.51305e+06	5.7883e+06	1.14518e+07	9.97516e+06	7.75706e+06	1.37324e+07	4.48385e+06	1.50444e+07	4.2296e+07	1.16106e+07	2.20022e+06	913807	1.02549e+07
M753T491_1	Dihomo-gamma-Linolenoyl PAF C-16	752.6	490.7	769.599	11.4611	C44H84NO7P	[M+H-H2O]+					155575-01-2		BioDeepDB	1	pos	482083	841968	654636	523339	1.75671e+07	3.15724e+06	502212	438043	1.09809e+07	476091	3.01339e+06	631745	622894	705015	382293	1.4107e+06	5.03633e+06	4.58891e+06	6.58752e+06	694549	5.79053e+06	2.69259e+06	106215	163875
M759T312_11	CAY10455	759.324	312.3	776.331	0.972265	C45H48N2O10	[M+H-H2O]+					290374-09-3		BioDeepDB	1	pos	637758	476327	831617	667550	882007	839078	1.08197e+06	443454	1.00446e+06	437121	979641	902991	917750	985334	931905	1.02257e+06	731492	983559	959885	500703	614099	753594	420402	463586
M785T690	Arachidonoyl thio-PC	784.568	689.6	783.56	0.481076	C44H82NO6PS	[M+H]+					146797-82-2		BioDeepDB	1	pos	1.09069e+06	235456	782306	966042	794882	526075	915950	571038	584160	614620	1.3011e+06	721387	503412	357929	397062	469116	2.71252e+06	3.92215e+06	1.73389e+06	1.80667e+06	716794	1.19919e+06	1.29359e+06	940619
M770T333_3	SELAMECTIN	770.451	333.3	769.44	4.80238	C43H63NO11	[M+H]+					165108-07-6		BioDeepDB	1	pos	254729	157638	165731	308260	176781	342913	317528	434475	260259	737892	544405	199807	369043	361504	453196	449843	329796	508391	206569	762542	623175	543623	194127	190852
M793T679_1	1,2-dipalmitoyl-sn-glycero-3-phosphoethanolamine-N-(succinyl)	792.555	679.3	791.531	20.2827	C41H78NO11P	[M+H]+					186800-61-3		BioDeepDB	1	pos	1.40255e+07	1.16045e+07	1.34241e+07	5.41385e+06	1.49785e+07	6.35043e+06	2.28217e+07	1.75098e+07	1.36627e+06	433436	2.74817e+06	1.9799e+06	6.89731e+06	9.04505e+06	6.38934e+06	1.17932e+06	1.91417e+07	2.01227e+07	2.00068e+07	1.892e+07	8.81347e+06	7.38415e+06	5.14531e+06	8.07985e+06
M793T454_1	Phosphine-biotin	793.341	454.4	792.332	1.95642	C41H53N4O8PS	[M+H]+							BioDeepDB	1	pos	56928.8	57278.9	48164.4	35848.1	26309.1	23632.6	20343.1	21689.6	26139.2	27018.6	29885.4	31578.5	16996.5	16019	17134.4	18371	137676	144514	124381	129216	46007.6	48603.1	40220.6	53270.1
M796T491_2	Coenzyme Q9	795.639	491.2	794.621	12.8199	C54H82O4	[M+H]+	Prenol lipids	Quinone and hydroquinone lipids	C01967	Metabolism of cofactors and vitamins	303-97-9	HMDB0006707	BioDeepDB	1	pos	404369	227478	584052	489833	968758	1.06294e+06	366440	431932	782558	409846	871627	467935	429709	472424	776021	208835	427833	237748	546000	443381	137641	772048	112577	486973
M807T492_1	Docetaxel	807.354	491.9	807.347	9.16574	C43H53NO14	[M]+	Prenol lipids	Diterpenoids	C11231	Digestive system	114977-28-5	HMDB0015378	BioDeepDB	1	pos	40718	28246.8	31981.5	53942.8	40805.2	23444.5	39112.8	44650.4	49460.1	43082.7	63132.3	36540.6	38003.3	33258	44204.1	28257.6	43550.3	34292.3	22976.6	28461	25646.2	30091.3	21112.7	28058.9
M825T492_2	Vincristine	825.404	491.9	824.4	3.72666	C46H56N4O10	[M+H]+	Vinca alkaloids		C07204	Biosynthesis of other secondary metabolites; Global and overview maps	57-22-7	HMDB0014681	BioDeepDB	1	pos	824101	901390	953329	423782	522604	183278	298461	240903	372385	262983	289429	173508	105742	62118.2	34213.8	35708.7	2.67788e+06	4.94631e+06	2.16178e+06	1.36951e+06	286050	592357	254785	67275.8
M807T333_1	Nodularin	807.45	333.3	824.443	17.7522	C41H60N8O10	[M+H-H2O]+			C15713		118399-22-7		BioDeepDB	1	pos	355362	328930	393359	198080	346047	290308	295645	157555	286260	284215	358788	271292	219569	301989	296485	81955	1.45939e+06	918797	1.53985e+06	776731	453174	531643	182437	615773
M826T329_2	PC(20_5(5Z,8Z,11Z,14Z,17Z)_20_5(5Z,8Z,11Z,14Z,17Z))	825.523	329	825.531	10.1208	C48H76NO8P	[M]+	Glycerophospholipids	Glycerophosphocholines				HMDB0008511	BioDeepDB	1	pos	192310	165278	158059	159154	130395	100859	163644	72823.6	131894	174398	170163	93064.4	118442	113776	84894	90400.5	475456	1.0976e+06	466977	397073	142901	173555	76457.1	148252
M811T288_2	PI(16_0_16_0)	810.524	287.9	810.526	2.43423	C41H79O13P	[M]+							BioDeepDB	1	pos	809201	660060	749656	836972	720911	718204	617967	643201	660752	631273	725038	717486	589175	600930	601961	690675	1.44859e+06	640480	1.43881e+06	1.37001e+06	916152	1.15607e+06	726758	1.02845e+06
M811T47_1	Maltopentaose	811.259	46.7	828.275	10.4132	C30H52O26	[M+H-H2O]+	Organooxygen compounds	Carbohydrates and carbohydrate conjugates			34620-76-3	HMDB12254	BioDeepDB	1	pos	174215	161125	80132.6	149772	38373.3	29551	32243	64371.6	95920.6	24882.5	25057.2	17137.4	7972.15	10601	10454.6	23765.5	686883	749129	434130	786317	109672	127581	120186	165158
M818T574_1	1-Stearoyl-2-Arachidonoyl PC-d8	817.646	574.1	817.644	3.09529	C46H76D8NO8P	[M]+							BioDeepDB	1	pos	1.03506e+06	7.58069e+06	1.15934e+06	1.44792e+06	758795	287895	343020	309718	799320	1.48172e+06	1.72084e+06	930112	658461	385995	762596	222365	2.79252e+06	3.87436e+06	3.54925e+06	2.54824e+06	850208	557576	699011	896755
M820T520_2	Sialyl-Lewis X	820.302	519.7	820.296	7.45338	C31H52N2O23	[M]+	Organooxygen compounds	Carbohydrates and carbohydrate conjugates			98603-84-0	HMDB0006565	BioDeepDB	1	pos	1.19163e+06	8.03649e+06	1.7237e+06	1.34277e+06	3.33354e+07	1.83033e+06	760170	1.24805e+06	1.07027e+06	3.52969e+06	2.74274e+06	1.49818e+06	671341	475949	786873	460449	2.97215e+06	4.8364e+06	4.25534e+06	4.17074e+06	1.1881e+06	1.44913e+06	1.12823e+06	1.42042e+06
M824T492_1	Virginiamycin	824.378	491.9	823.354	19.8938	C43H49N7O10	[M+H]+	Carboxylic acids and derivatives	Amino acids, peptides, and analogues	C11269		11006-76-1/23152-29-6	HMDB0030520	BioDeepDB	1	pos	779994	803622	953972	730228	642672	451676	737810	677671	616360	791078	906291	570703	301404	415761	562787	317049	2.52384e+06	2.81635e+06	2.47873e+06	2.02483e+06	663182	751070	430862	596429
M831T520	Galb1-3[Neu5Aca2,6]GalNAca-Thr	831.312	520.1	831.312	0.204971	C32H53N3O22	[M]+							BioDeepDB	1	pos	1.68736e+06	1.40546e+06	1.53786e+06	1.01346e+06	528551	1.37353e+06	1.04591e+06	950653	1.4118e+06	1.43348e+06	1.37216e+06	1.32814e+06	1.21079e+06	1.2348e+06	859297	869566	1.99763e+06	1.38234e+06	828403	1.48282e+06	632609	1.15815e+06	965218	1.17921e+06
M854T312_16	Paclitaxel	854.333	312	853.331	5.96957	C47H51NO14	[M+H]+	Prenol lipids	Diterpenoids	C07394	Chemical structure transformation maps; Global and overview maps; Metabolism of terpenoids and polyketides; Digestive system	33069-62-4	HMDB0015360	BioDeepDB	1	pos	495796	572663	649227	495710	541644	615249	651193	730809	719152	677082	768428	580055	909364	735905	725567	661359	628257	439185	607269	594814	515164	450993	137421	379922
M879T640_2	Dolastatin 16	878.52	640.2	878.515	5.75685	C47H70N6O10	[M]+							BioDeepDB	1	pos	423435	323437	125267	337711	167134	162843	185470	138768	170845	112499	55111.3	143871	233949	65348.7	39174.6	157688	1.01794e+06	929833	1.09246e+06	863827	228371	203715	59031.7	163692
M885T48_3	TG(18_1(9Z)_18_1(9Z)_18_1(9Z))	884.783	48	884.783	0.892875	C57H104O6	[M]+					122-32-7	HMDB05453	BioDeepDB	1	pos	167740	157946	215880	173717	256119	276314	218201	274947	375642	584566	407586	463585	278764	208523	240527	188341	599818	915942	257809	711556	368610	139164	407705	391293
M927T471	Nystatin	926.53	471	925.504	20.8304	C47H75NO17	[M+H]+	Organooxygen compounds	Carbohydrates and carbohydrate conjugates	C06572		1400-61-9	HMDB0014784	BioDeepDB	1	pos	434340	283680	366467	153023	193883	97969.7	89028.9	24852.9	361364	483836	67718.6	85533.6	163270	105044	94224.7	66225.5	640029	454731	451328	268579	70038.2	51291.6	114534	144761
M930T520_2	GalNAca1-3[Fuca1-2]Galb1-4[Fuca1-3]GlcNAcb-Sp	930.36	519.8	947.371	3.2395	C36H61N5O24	[M+H-H2O]+							BioDeepDB	1	pos	192041	338466	493243	198913	72618.2	97229.5	23792.4	93001.1	1.25757e+06	1.33223e+06	2.58821e+06	2.77685e+06	1.66282e+06	1.35015e+06	1.28369e+06	1.20444e+06	986026	991530	804545	993200	10551.8	981663	464617	614692
M951T567_2	REBAUDIOSIDE C	951.444	567.1	950.436	0.683252	C44H70O22	[M+H]+					63550-99-2		BioDeepDB	1	pos	330297	239419	455033	343177	556103	662419	112946	517299	522213	211031	139727	186351	572205	548868	566057	584332	734664	609866	427189	480572	353432	571741	581173	521708
M964T547_1	7-XYLOTAXOL B	964.4	547.2	963.389	4.00233	C50H61NO18	[M+H]+					90352-19-5		BioDeepDB	1	pos	146679	86346.6	172046	168523	278582	200696	285413	299400	216861	276906	203328	219016	158425	124601	164654	118943	654664	772921	571164	463046	224178	251593	217098	231282
M966T547_1	Isorebaudioside A	966.435	547	966.431	4.46119	C44H70O23	[M]+					1058600-85-3		BioDeepDB	1	pos	731123	524100	775113	483533	296918	785701	169120	692797	702461	315241	501070	438492	951173	710730	601928	251115	281726	273059	296396	840705	656174	581902	729762	783463
M976T312_19	Crocin	976.404	312.2	976.379	4.37934	C44H64O24	[M-H2O+NH4]+	Prenol lipids	Diterpenoids	C08589	Biosynthesis of other secondary metabolites; Global and overview maps	42553-65-1/39465-00-4	HMDB0002398	BioDeepDB	1	pos	105938	77677	192707	54909.4	76572.8	156684	67899.2	94722.5	32955.1	45791	98080.8	57512.1	50788.6	18074.3	32984.2	19369.4	235266	275817	290081	445096	30890.9	93650.1	51681.1	2561.26
M991T47_2	Maltohexaose	991.326	46.7	990.327	9.15542	C36H62O31	[M+H]+	Organooxygen compounds	Carbohydrates and carbohydrate conjugates	C01936		34620-77-4	HMDB0012253	BioDeepDB	1	pos	1.17098e+06	715650	821029	682805	1.20187e+06	740609	1.04561e+06	1.08101e+06	104664	360601	290525	175007	203342	170602	198472	38258.7	1.60772e+06	1.08841e+06	814166	1.13633e+06	211540	203756	100455	229206
M429T660	SMZ-PtO	429.088	659.7	429.086	5.97178	C17H15N7O5S	[M]+							MoNA	1	pos	301809	241335	201574	1.6021e+06	2.57153e+06	330145	437891	241406	1.12586e+06	906961	1.55027e+06	860727	905584	359291	915178	286718	963924	192023	1.12757e+06	1.03784e+06	197669	841339	117648	209793
M110T40_2	4-Chloroaniline	110.009	40.1	127.019	23.3254	C6H6ClN	[M+H-H2O]+			C14450	Xenobiotics biodegradation and metabolism; Global and overview maps	106-47-8		MoNA	1	pos	9.77852e+06	8.75823e+06	3.44594e+06	1.59005e+07	1.34935e+07	8.35122e+06	2.7669e+07	7.21962e+06	9.17829e+06	9.9141e+06	6.22826e+06	1.77483e+07	1.17054e+07	1.58576e+07	2.177e+07	6.39221e+06	1.25641e+07	1.94962e+07	1.92047e+07	2.15389e+07	2.7675e+07	2.39568e+07	6.06858e+06	4.53908e+06
M120T101	indoline	120.081	100.9	119.164	2.70411	C8H9N	[M+H]+	Organonitrogen compounds	Amines			496-15-1/		MoNA	1	pos	1.38261e+06	3.75719e+06	1.9215e+06	1.72133e+06	1.08849e+06	1.8428e+06	1.59604e+06	1.37622e+06	1.41595e+06	1.74768e+06	2.00763e+06	1.36535e+06	1.49474e+06	1.12802e+06	3.3248e+06	1.23888e+06	1.70518e+06	1.82723e+06	2.0023e+06	1.82873e+06	2.50663e+06	1.41285e+06	1.66622e+06	1.2295e+06
M130T54	Quinoxaline	130.05	54.3	130.053	21.5301	C8H6N2	[M]+			C18575		91-19-0		MoNA	1	pos	3.76858e+06	3.95641e+06	3.53307e+06	968774	3.40152e+06	3.64664e+06	3.60908e+06	3.54483e+06	3.57809e+06	3.57807e+06	3.54425e+06	3.55048e+06	3.49336e+06	3.4801e+06	3.21789e+06	892042	3.92825e+06	3.71619e+06	3.55602e+06	3.48252e+06	892154	913448	3.694e+06	3.34341e+06
M139T53	Methyl pyrazine 2-carboxylate	139.051	52.7	138.043	2.85197	C6H6N2O2	[M+H]+					6164-79-0		MoNA	1	pos	1.76142e+06	1.52877e+06	1.73403e+06	2.10086e+06	664858	646447	677895	572893	676934	811965	795699	701892	202324	200665	142124	718500	1.40674e+06	1.39407e+06	1.3498e+06	1.31292e+06	857223	963929	905133	890634
M146T40_3	1H-Benzotriazole-5-carboxylic acid	146.03	40.2	163.038	4.39909	C7H5N3O2	[M+H-H2O]+					23814-12-2		MoNA	1	pos	4.57164e+06	3.58013e+06	4.67631e+06	6.73935e+06	921387	959879	913237	567244	875164	1.38942e+06	1.29935e+06	886498	17060.8	16566.7	10633.7	557537	3.50475e+06	3.29179e+06	2.92269e+06	2.30608e+06	1.25401e+06	1.84302e+06	1.61173e+06	1.35319e+06
M150T448	2-Aminobenzothiazole	150.027	448	150.025	13.5363	C7H6N2S	[M]+					136-95-8		MoNA	1	pos	180438	105942	163926	146446	446147	280567	348004	285388	81994.7	130968	206126	81923.4	387480	393780	452644	498257	61665.7	208497	183460	181708	264476	235099	36290.3	289534
M151T77	(+)-Norephedrine	151.097	77.3	151.1	19.193	C9H13NO	[M]+	Benzene and substituted derivatives	Phenylpropanes	C02343		c("37577-28-9", "154-41-6", "14838-15-4")	HMDB0001942	mzCloud	1	pos	3.20203e+06	4.71302e+06	1.0061e+06	3.54842e+06	5.39834e+06	4.22038e+06	822005	920910	794893	2.79469e+06	4.27365e+06	5.9928e+06	784201	4.56056e+06	798280	1.03592e+07	801654	2.91029e+06	844641	772628	4.0873e+06	2.86644e+06	789340	837550
M156T276	4-Phenylpyridine	156.081	276.5	155.073	2.72106	C11H9N	[M+H]+	Pyridines and derivatives	Phenylpyridines			939-23-1	HMDB33123	MoNA	1	pos	137624	113849	187900	205840	136762	148100	136071	131794	155827	134183	133673	128739	49897.8	70184.3	51843.6	147801	101431	149818	139958	136551	144217	122788	142975	117680
M159T468	N-Nitrosodi-n-butylamine	159.15	468.3	158.142	2.58124	C8H18N2O	[M+H]+			C19277		924-16-3		MoNA	1	pos	45504	9439.86	55075	6464.7	9203.91	64858.1	3077	68724.4	11176.9	43496	69266.3	52383.1	39409.5	57567	13765.7	55692.8	61489.6	32967.4	69061.5	92859.5	57948.3	48238	40622.5	50109.7
M166T383	2-Nitrobenzamide	166.036	382.5	166.038	11.0943	C7H6N2O3	[M]+					610-15-1		MoNA	1	pos	181544	360187	96232.1	115248	88077.4	807743	133920	50605.3	44854.9	33112.3	24572.6	364413	109714	23703	174648	359950	131066	314166	152830	554991	579457	255965	730404	79082.3
M180T319	Hydroxyatrazine	180.122	318.7	197.128	7.96128	C8H15N5O	[M+H-H2O]+	Triazines	Aminotriazines	C06552	Xenobiotics biodegradation and metabolism; Global and overview maps	2163-68-0	HMDB0062766	MoNA	1	pos	197903	208739	205605	171617	130310	178046	157103	138115	160036	165773	164888	224231	210147	155348	158595	242606	164430	135685	218383	180309	151613	167877	120712	116025
M182T74	3-Bromo-N,N-dimethylaniline	181.992	73.6	199	0.70014	C8H10BrN	[M+H-H2O]+					66314-77-0		MoNA	1	pos	6.89687e+06	3.31998e+06	7.16488e+06	1.47553e+06	1.49742e+06	1.52641e+06	3.19384e+06	3.56799e+06	3.98442e+06	2.60187e+06	4.24852e+06	3.18956e+06	3.10087e+06	3.44915e+06	2.69541e+06	2.65543e+06	3.43423e+06	1.35942e+06	2.94732e+06	3.32549e+06	6.95486e+06	6.69574e+06	7.07944e+06	2.06931e+06
M185T305	(2-Naphthalenyloxy)acetic acid	185.056	304.7	202.063	3.96636	C12H10O3	[M+H-H2O]+	Benzene and substituted derivatives	Phenoxyacetic acid derivatives	C18750		120-23-0	HMDB0032706	MoNA	1	pos	4.66128e+06	2.59717e+06	3.08565e+06	2.75652e+06	2.02406e+06	1.15226e+06	2.612e+06	1.11168e+06	2.66676e+06	2.27361e+06	2.91283e+06	1.22965e+06	1.10326e+06	1.1106e+06	1.16132e+06	1.20261e+06	3.59753e+06	4.56429e+06	2.46499e+06	3.42211e+06	1.03282e+06	1.03824e+06	2.51865e+06	999711
M188T278	Selegiline	188.144	277.8	187.281	2.25602	C13H17N	[M+H]+	Organonitrogen compounds	Amines			14611-51-9	HMDB0015171	MoNA	1	pos	1.58728e+06	782134	2.68802e+06	1.5045e+06	4.64621e+06	4.99696e+06	3.93956e+06	2.38791e+06	4.04991e+06	3.74291e+06	2.69141e+06	2.66504e+06	2.82434e+06	2.11929e+06	3.24303e+06	3.7256e+06	2.21329e+06	5.06773e+06	5.32448e+06	1.44057e+06	2.62139e+06	2.30448e+06	4.0921e+06	2.26789e+06
M189T40	2,6-Dichlorobenzamide	188.979	39.9	188.975	21.1664	C7H5Cl2NO	[M]+			C10934		2008-58-4		MoNA	1	pos	688586	370035	565908	618415	358073	341605	398390	337442	207708	294928	93384.3	139382	59013.7	43966	43924.2	56508.6	1.24036e+06	2.13241e+06	1.16186e+06	1.34474e+06	251986	284931	329715	304020
M230T351	Icaridin	230.176	350.8	229.168	2.30435	C12H23NO3	[M+H]+					119515-38-7		MoNA	1	pos	1.03114e+06	1.03192e+06	1.00956e+06	833887	423307	576691	597454	592644	852209	936052	1.06426e+06	954690	397208	400150	306803	405383	856246	1.11846e+06	1.03083e+06	963009	372537	727534	444395	446821
M223T62	Thiram	222.975	61.5	239.988	25.4109	C6H12N2S4	[M+H-H2O]+			C11160		137-26-8		MoNA	1	pos	492036	432020	460746	465911	449541	459552	472218	412129	443431	462904	450178	437549	450879	428974	445992	431436	483272	421272	437316	453593	428961	455641	472027	424490
M230T425	dodecyldimethylamine N-oxide	230.248	425.5	229.403	2.4295	C14H31NO	[M+H]+					1643-20-5/		MoNA	1	pos	4.97927e+06	2.76064e+06	2.87847e+06	2.52252e+06	1.99258e+06	2.47481e+06	2.07031e+06	1.78578e+06	2.53998e+06	1.89694e+06	1.86376e+06	1.71966e+06	2.5296e+06	1.80499e+06	2.02298e+06	2.8444e+06	2.09291e+06	2.83811e+06	2.15447e+06	2.67139e+06	2.08942e+06	1.80835e+06	1.73832e+06	2.55994e+06
M246T61	Parathion-methyl	245.991	61.2	263.002	12.4639	C8H10NO5PS	[M+H-H2O]+			C14228		298-00-0		MoNA	1	pos	327477	142071	741453	1.07383e+06	881917	123196	908091	532915	510709	113560	615496	947223	967513	310556	2.12676e+06	896915	811207	2.03383e+06	1.80891e+06	1.59318e+06	2.74829e+06	2.48244e+06	408064	249730
M257T681	Mono-benzyl phthalate	257.268	680.6	256.254	24.5814	C15H12O4	[M+H]+	Benzene and substituted derivatives	Benzoic acids and derivatives			2528-16-7/	HMDB0061744	MoNA	1	pos	1.66866e+06	1.38812e+06	2.62202e+06	1.61882e+06	3.26551e+06	3.14716e+06	2.88987e+06	1.4738e+06	2.83205e+06	3.97267e+06	2.97183e+06	3.70971e+06	2.62788e+06	2.45944e+06	4.11789e+06	4.4492e+06	1.72674e+06	4.45567e+06	4.41364e+06	1.18113e+06	2.93653e+06	2.27308e+06	2.72458e+06	1.47183e+06
M278T410	Fenthion	278.014	409.9	278.02	22.3011	C10H15O3PS2	[M]+	Organic thiophosphoric acids and derivatives	Thiophosphoric acid esters	C14420		55-38-9	HMDB0033209	MoNA	1	pos	69908.1	56483.7	210966	50725.1	62934.1	59952.5	50599	59715.3	361627	272292	319232	307319	303316	279366	41777.9	46902.5	396782	189290	205374	212004	41228.4	42109.9	134502	46915.5
M296T300	flunixin	296.243	299.7	296.245	4.05072	C14H11F3N2O2	[M]+	Pyridines and derivatives	Pyridinecarboxylic acids and derivatives			38677-85-9/		MoNA	1	pos	2.76087e+06	7.13532e+06	318897	6.67397e+06	9.98596e+06	1.12223e+07	1.35022e+07	1.54773e+07	4.57278e+06	1.24353e+07	1.63728e+07	730800	1.82245e+07	1.45355e+07	802626	1.33414e+07	1.03505e+07	1.13218e+07	1.28006e+07	1.05457e+07	1.34904e+07	1.44983e+07	6.73242e+06	3.08632e+07
M281T40	3-Iodopropynyl butylcarbamate	280.993	40.2	280.991	5.06553	C8H12INO2	[M]+					55406-53-6		MoNA	1	pos	1.90828e+06	967293	1.59225e+06	1.03016e+06	1.03351e+06	1.06373e+06	905715	1.06239e+06	794040	685504	1.14569e+06	1.12419e+06	872648	1.09422e+06	677135	950986	500355	752163	791132	1.25182e+06	2.01409e+06	1.77255e+06	1.70169e+06	1.73692e+06
M281T501	Dodemorph	281.267	501.2	281.272	16.7101	C18H35NO	[M]+			C18786		1593-77-7		MoNA	1	pos	1.46367e+06	1.5697e+06	1.44058e+06	1.29902e+06	1.49606e+06	1.34327e+06	1.10628e+06	1.49388e+06	1.39507e+06	1.49522e+06	1.27265e+06	1.34442e+06	1.52643e+06	1.55569e+06	1.46783e+06	1.39441e+06	1.37861e+06	1.44497e+06	1.52441e+06	1.31415e+06	1.55308e+06	1.61237e+06	1.45818e+06	1.29553e+06
M285T392	Tris(2-chloroethyl)phosphate	284.961	391.7	283.954	0.786071	C6H12Cl3O4P	[M+H]+			C14445		115-96-8		MoNA	1	pos	10583.8	23272.9	10963.8	28530.2	12647.6	11946.5	41385.2	7809.73	19125.5	21104.3	35247.7	11523.2	10719.4	12271.8	36315.9	20101.7	37940.7	7238.68	13523.6	10382.5	10915.4	10020.6	5215.71	38640.1
M296T147	Pethoxamid	296.136	147.1	295.804	17.1631	C16H22ClNO2	[M+H]+	Organooxygen compounds	Ethers			106700-29-2/		MoNA	1	pos	64837	115517	261177	176492	232706	108460	134256	137367	72840.9	120596	129565	162311	75273.3	124581	293625	130963	73438.2	185057	104838	221860	852349	304220	53149.9	76649.3
M318T452	diphenyl phthalate	318.327	452.2	318.323	14.7647	C20H14O4	[M]+	Carboxylic acids and derivatives	Carboxylic acid derivatives			84-62-8/		MoNA	1	pos	112607	21333.7	90418.8	84313.2	30053.5	17666.7	62120.3	22888	147396	124749	35350.6	28699	27324.8	38219.5	25016.7	20271.8	115230	20726.4	149706	26832.4	146298	129167	119163	97749.1
M326T420	NPE_327.1704_12.2	326.163	420.5	326.163	1.35688	C19H22N2O3	[M]+							MoNA	1	pos	390951	244038	360241	302552	321214	84932.5	317779	262217	229295	319100	381728	211291	371480	421368	367431	374685	243638	270854	285027	205825	300513	326427	269201	349911
M329T314	sulcotrione	329.028	314.2	328.768	10.339	C14H13ClO5S	[M+H]+	Organooxygen compounds	Carbonyl compounds			99105-77-8/		MoNA	1	pos	1.58541e+07	1.77226e+07	1.43375e+07	1.14128e+07	1.36431e+07	2.56744e+07	4.0633e+07	1.96842e+07	1.2518e+07	1.31882e+07	1.42353e+07	1.36836e+07	1.66745e+07	1.40381e+07	1.84354e+07	1.68434e+07	304545	9.01276e+06	92213.3	269820	468642	293657	249316	2.8627e+06
M386T333_3	Medroxyprogesterone acetate	386.248	333.1	386.246	5.17802	C24H34O4	[M]+			C08150		71-58-9		MoNA	1	pos	1.38095e+07	2.85906e+06	9.86563e+06	1.30962e+07	1.58036e+07	5.38614e+07	1.10455e+07	1.01363e+07	9.73298e+06	5.01443e+07	1.55405e+07	4.94541e+06	1.04806e+08	1.18023e+07	1.08475e+07	1.39249e+07	1.49089e+07	1.08483e+07	3.53961e+07	1.13457e+07	1.24431e+07	1.05526e+07	2.37823e+06	1.05313e+07
M437T50	Cefazolin	437.017	49.7	454.03	13.8805	C14H14N8O4S3	[M+H-H2O]+	Lactams	Beta lactams	C06880	Digestive system	25953-19-9	HMDB0015422	MoNA	1	pos	235668	350068	496455	558572	240241	237428	297578	237328	210820	323132	263986	352389	183462	205913	177212	240527	485257	167611	371840	210048	274703	329342	205474	291211
M470T378	Ebastin	470.312	378.4	469.659	14.3405	C32H39NO2	[M+H]+					90729-43-4/		MoNA	1	pos	14161.8	10946.3	11170.9	43177.4	40050.1	52192.3	25449.5	22641.2	48915.4	25099.5	41863.5	19442.1	17257.1	18020.3	16221	13106.1	10270.8	19857.7	15358.8	12295.1	11100.9	12069.5	6233.47	9724.04
M514T589	Ketoconazole	514.422	589.1	531.432	5.96009	C26H28Cl2N4O4	[M+H-H2O]+	Carboxylic acids and derivatives	Carboxylic acid derivatives					MoNA	1	pos	6.39644e+06	1.58288e+06	208697	1.49067e+06	1.86216e+06	2.62861e+06	1.73128e+06	1.19372e+07	3.69242e+06	6.57312e+06	9.38616e+06	683195	1.04797e+07	9.0886e+06	1.4638e+06	1.51121e+07	9.68804e+06	8.87839e+06	1.1358e+07	9.25728e+06	1.5616e+07	1.67399e+07	1.12062e+07	3.01198e+07
M764T471	Clarithromycin N-Oxide	764.478	471.5	763.472	1.15358	C38H69NO14	[M+H]+					118074-07-0		MoNA	1	pos	580258	374381	418127	427827	289011	263697	203030	251918	271902	162469	285395	241159	126951	42477.9	84383.7	22812.7	1.73299e+06	1.35583e+06	1.24008e+06	909458	294470	309487	195422	454059
M163T637	Caffeic acid	163.149	637.3	180.157	7.75979	C9H8O4	[M+H-H2O]+	Phenols	Benzenediols	C01197		331-39-5	HMDB0001964	MoNA	1	pos	6.19178e+06	5.19812e+06	6.17414e+06	6.20327e+06	7.1688e+06	6.97364e+06	5.00541e+06	6.69896e+06	5.09476e+06	5.36594e+06	6.06008e+06	5.75168e+06	7.28042e+06	5.42993e+06	5.48317e+06	5.75795e+06	5.4495e+06	5.03361e+06	5.44234e+06	5.4558e+06	6.44869e+06	5.9831e+06	5.9263e+06	5.2161e+06
M169T57	3-Phosphoglyceric acid	168.983	57.1	185.993	14.5932	C3H7O7P	[M+H-H2O]+	Organooxygen compounds	Carbohydrates and carbohydrate conjugates	C00597		820-11-1	HMDB0000807	MoNA	1	pos	1.05237e+07	6.65946e+06	9.83986e+06	5.76853e+06	9.65189e+06	5.85797e+06	6.7573e+06	6.09335e+06	6.35795e+06	8.37537e+06	6.71063e+06	5.57743e+06	6.13017e+06	4.39898e+06	6.80707e+06	4.3849e+06	2.23229e+06	5.99622e+06	6.75938e+06	7.34287e+06	9.38167e+06	6.04376e+06	4.66188e+06	3.47413e+06
M186T40_2	Phosphoserine	186.019	40.4	185.009	15.0543	C3H8NO6P	[M+H]+	Carboxylic acids and derivatives	Amino acids, peptides, and analogues	C01005	Biosynthesis of other secondary metabolites; Translation; Amino acid metabolism; Energy metabolism; Global and overview maps	407-41-0	HMDB0000272	MoNA	1	pos	151869	31332.2	41527.7	42369.7	50281.7	56000.8	53008.2	58129.7	46615.8	55674.2	145821	78602.7	43579.1	96521.1	146740	133594	124727	41042.5	65405.9	184844	38280.5	51239.6	25959.7	62365.1
M214T532	Indoxyl sulfate	214.217	532.1	213.21	1.75523	C8H7NO4S	[M+H]+	Organic sulfuric acids and derivatives	Sulfuric acid esters			487-94-5	HMDB0000682	MoNA	1	pos	4.71581e+06	1.1655e+06	1.36727e+06	4.26526e+06	3.32544e+06	821565	6.49208e+06	3.35297e+06	2.89123e+06	2.86197e+06	2.65116e+06	835180	3.23393e+06	2.63335e+06	3.25792e+06	4.05306e+06	5.75566e+06	6.6659e+06	5.36889e+06	4.88519e+06	1.02751e+07	3.63763e+06	2.56529e+06	844500
M273T506	Pesticide3_Chloroxuron_C15H15ClN2O2_Urea, N'-[4-(4-chlorophenoxy)phenyl]-N,N-dimethyl-	273.079	505.6	290.082	14.3863	C15H15ClN2O2	[M+H-H2O]+					1982-47-4		MoNA	1	pos	651797	717470	747858	724624	654111	890193	766517	901630	914969	719299	915046	716374	809945	920815	620729	712281	706310	588391	1.00804e+06	654913	703985	789698	468015	759618
M291T362	N-acetylneuraminate	291.253	361.5	308.262	4.89609	C11H18NO9	[M+H-H2O]+	Organooxygen compounds	Alcohols and polyols					MoNA	1	pos	19899.9	663386	25292.3	17632	44822.1	274178	19213.1	63742.5	18360.1	135016	19303.3	114586	12946.2	14647.7	18826.2	25186.6	22554.7	27723.5	20630.5	19572.8	15050.6	25933.3	12175.2	22734.1
M394T390	dADP	394.035	390	411.034	19.8815	C10H15N5O9P2	[M+H-H2O]+	Purine nucleotides	Purine deoxyribonucleotides	C00206	Global and overview maps; Nucleotide metabolism	2793-06-8	HMDB0001508	MoNA	1	pos	717882	154082	180253	638787	938933	753067	777511	155314	761580	774252	916252	496207	905949	251961	895720	536301	958638	519185	561019	627052	191254	593210	277563	465400
M784T503_2	FAD	783.533	503.1	782.526	0.224624	C27H30N9O15P2	[M+H]+	Organic phosphoric acids and derivatives	Phosphate esters					MoNA	1	pos	485588	389821	478644	693052	655140	704021	565957	301166	337740	215700	669488	467742	433863	475596	378914	368045	161745	273465	433511	364274	309737	318709	176453	310629
M185T40	OCP_186.0317_15.9	185.024	40.3	185.024	3.00597	C8H8ClNO2	[M]+					6961-49-5		MoNA	1	pos	2.49134e+06	2.90292e+06	2.90552e+06	3.3893e+06	2.70848e+06	2.94938e+06	3.0897e+06	3.64903e+06	3.22426e+06	2.93155e+06	2.80806e+06	2.83736e+06	3.0165e+06	2.59243e+06	3.22447e+06	2.98716e+06	3.21435e+06	3.3063e+06	3.29402e+06	3.28165e+06	3.20533e+06	3.3546e+06	3.86238e+06	3.14042e+06
M191T41	2-Chlorobenzenesulfonamide	190.98	41	190.981	5.11631	C6H6ClNO2S	[M]+					6961-82-6		MoNA	1	pos	795870	133858	2.75089e+06	7.21049e+06	2.45967e+06	640532	94756.6	206701	3.19389e+06	2.58718e+06	4.75244e+06	4.29401e+06	6.65384e+06	2.62018e+06	7.73361e+06	3.29776e+06	3.42412e+06	3.07308e+06	3.79063e+06	6.56355e+06	7.5684e+06	8.68408e+06	906887	943165
M222T68	Carbofuran	222.113	67.7	221.105	3.70982	C12H15NO3	[M+H]+	Coumarans		C14291		1563-66-2	HMDB0031770	mzCloud	1	pos	6.08983e+06	6.10712e+06	8.71676e+06	5.6989e+06	5.49976e+06	4.88429e+06	5.6675e+06	5.18773e+06	4.93128e+06	4.47164e+06	4.86804e+06	4.71749e+06	4.5486e+06	3.19222e+06	4.77714e+06	4.9776e+06	6.52079e+06	5.44206e+06	6.2983e+06	6.63866e+06	4.85041e+06	7.0082e+06	7.47766e+06	3.32369e+06
M234T223	LID_235.1805_10.1	234.178	223.4	234.173	20.4403	C14H22N2O	[M]+			D00358		137-58-6		MoNA	1	pos	1.1093e+06	1.02887e+06	4.7139e+06	1.68369e+06	1.67878e+06	4.59406e+06	1.97205e+06	1.25057e+06	1.66858e+06	2.40353e+06	1.30837e+06	1.51751e+06	1.98413e+06	1.47741e+06	3.95152e+06	2.0547e+06	2.16109e+06	2.25378e+06	1.89267e+06	1.77332e+06	1.13592e+06	1.31332e+06	679275	1.16456e+06
M236T451	Penciclovir	236.114	451.4	253.118	17.932	C10H15N5O3	[M+H-H2O]+	Imidazopyrimidines	Purines and purine derivatives	C07417		39809-25-1	HMDB0014444	MoNA	1	pos	216511	295885	341977	414262	302127	65021	72507.4	211172	106041	47721.3	115678	124589	255241	466429	85442	86403.2	139596	71048.4	117055	477301	46829.2	42608.9	78646.5	44204
M236T50	DROPROPIZINE	236.149	49.8	236.152	13.8805	C13H20N2O2	[M]+					17692-31-8		MoNA	1	pos	204800	830263	457722	726712	624568	734428	673151	815927	652643	837231	770331	742957	720424	632195	767343	724302	552810	1.08177e+06	683520	813752	1.37144e+06	800188	512889	713789
M251T411	Rivastigmine	251.181	411.3	250.168	22.6771	C14H22N2O2	[M+H]+	Benzene and substituted derivatives	Phenoxy compounds	C11766		123441-03-2	HMDB0015124	MoNA	1	pos	4.7737e+06	5.4692e+06	5.10106e+06	4.74553e+06	4.0439e+06	5.56592e+06	4.65293e+06	4.59927e+06	4.44152e+06	6.12488e+06	5.44016e+06	5.4149e+06	5.14379e+06	4.44724e+06	4.81318e+06	5.11131e+06	5.22978e+06	5.61337e+06	5.06248e+06	4.75451e+06	4.56951e+06	4.76594e+06	4.16248e+06	5.40353e+06
M264T335	PRZ_M282	263.999	335	281.014	27.5118	C11H14Cl3NO	[M+H-H2O]+					67747-01-7		MoNA	1	pos	61223.7	41192.5	44242.3	30853.6	60200	67766.1	162660	51548.7	49947.1	60800.6	29793.4	50787.4	24167.7	47678	60587.7	20729.1	55567.6	302610	35573.5	122110	37908.9	37840.3	37530	48840.5
M268T516	Mepyramine	268.176	516.3	285.184	2.11055	C17H23N3O	[M+H-H2O]+	Benzene and substituted derivatives	Benzylamines	C11798		91-84-9/NA	HMDB0015639	MoNA	1	pos	2.37003e+06	2.70296e+06	2.49681e+06	772367	2.57368e+06	2.65831e+06	2.97018e+06	3.69677e+06	2.73082e+06	3.04309e+06	2.91919e+06	2.6735e+06	2.77786e+06	3.20596e+06	2.49354e+06	2.00804e+06	2.55044e+06	3.96524e+06	3.29739e+06	2.68911e+06	2.64617e+06	2.86545e+06	2.66958e+06	570219
M292T54_2	Benproperine	292.443	54	309.446	15.5039	C21H27NO	[M+H-H2O]+	Organooxygen compounds	Ethers					MoNA	1	pos	3.33072e+06	2.79626e+06	3.48151e+06	3.54506e+06	2.10048e+06	3.08655e+06	2.83108e+06	3.96881e+06	2.16451e+06	1.72243e+06	18413.7	1.90616e+06	2.95835e+06	1.75984e+06	1.41703e+06	2.58825e+06	2.30541e+06	2.8224e+06	2.83692e+06	2.77776e+06	2.57455e+06	3.01558e+06	3.41306e+06	2.19362e+06
M324T404_2	PRZ_M323b	323.993	403.6	322.988	6.33434	C12H12Cl3NO3	[M+H]+							MoNA	1	pos	468343	453092	479125	430556	70391.3	19188.1	313055	118233	699574	501053	732212	406724	328622	243724	79282.8	34090.1	846542	835018	769115	623720	636833	691285	392946	554880
M333T499	Dichlofluanid	332.963	499	331.962	20.651	C9H11Cl2FN2O2S2	[M+H]+			C18820		1085-98-9		MoNA	1	pos	55818.6	41109.4	51677.5	72153.8	71706	67575.8	75038.1	52025.2	62663	55164.6	81650.3	51489	60548	50458.8	61858.8	47978.9	76211	43312.4	54577.7	42810.8	51340.5	56614.1	33824.4	76200.2
M353T424	PRZ_M353	353.023	423.7	352.015	2.5455	C13H15Cl3N2O3	[M+H]+							MoNA	1	pos	21427.9	24489.9	23709.5	27368.2	29403.4	18221.2	26540.6	3303.47	24518.2	19146.5	31747.3	14470.6	22282.5	17055	32142.5	10854	27029.6	24728	18916.9	18140	18081.8	29055.1	10648	24796.4
M373T48_2	Permethrin	373.081	48.3	390.079	24.2146	C21H20Cl2O3	[M+H-H2O]+	Fatty Acyls	Fatty acid esters	C14388		52645-53-1	HMDB0015604	MoNA	1	pos	239249	186371	200190	307042	200941	252865	221510	253899	240473	210012	280783	252656	254469	203163	272618	213701	223370	140881	239934	211435	204100	201334	162102	200854
M423T545	Fludrocortisone	423.215	545.4	380.2	5.77231	C21H29FO5	[M+H]+	Steroids and steroid derivatives	Hydroxysteroids	C07004		127-31-1	HMDB0014825	MoNA	1	pos	1.33272e+07	6.10335e+06	9.3318e+06	7.15344e+06	6.52346e+06	7.9552e+06	7.22793e+06	6.49423e+06	4.72022e+06	8.56972e+06	7.94477e+06	4.34665e+06	4.80452e+06	4.7061e+06	5.23898e+06	3.96748e+06	1.53845e+07	2.0361e+07	1.61485e+07	1.16758e+07	6.4888e+06	2.98261e+06	5.53497e+06	7.01372e+06
M393T660	Betamethasone	393.205	659.7	392.2	4.2624	C22H29FO5	[M+H]+	Steroids and steroid derivatives	Hydroxysteroids	C06848		378-44-9	HMDB0014586	MoNA	1	pos	789737	573754	561691	791347	804700	892518	859368	810867	794836	607129	849965	695178	750877	671465	629679	696904	735520	382576	632280	647354	522085	564975	520252	646859
M441T260_2	tembotrione	441.042	260.1	440.82	8.168	C17H16ClF3O6S	[M+H]+					335104-84-2/		MoNA	1	pos	248871	461324	374324	366474	362922	84161.4	341335	72735	403077	366981	447683	71426	308234	322601	538981	135101	139210	348727	88260.1	330030	203949	448690	186690	353567
M529T445_1	Ceftazidime	529.086	445.3	546.099	11.2761	C22H22N6O7S2	[M+H-H2O]+	Lactams	Beta lactams	C06889		78439-06-2/72558-82-8	HMDB0014582	MoNA	1	pos	6.08891e+06	3.62261e+06	5.9138e+06	7.98601e+06	3.28889e+06	3.49028e+06	704068	2.49145e+06	2.30885e+06	2.72234e+06	833277	2.33607e+06	3.3112e+06	993743	4.14312e+06	1.18296e+06	2.69643e+06	713567	930150	1.99147e+06	7.17927e+06	4.73119e+06	1.2524e+06	4.78427e+06
M551T548	Aliskiren	551.396	547.8	551.393	5.01193	C30H53N3O6	[M]+	Carboxylic acids and derivatives	Amino acids, peptides, and analogues			173334-57-1	HMDB15387	MoNA	1	pos	221762	303719	281427	366582	225157	341331	348854	207278	104408	170620	252856	270051	370076	289071	353887	485824	219798	463277	133199	381748	579459	502204	540087	164533
M116T355	2-Aminobenzimidazole	116.053	355.3	133.064	29.0039	C7H7N3	[M+H-H2O]+			C10901		934-32-7		MoNA	1	pos	306498	238359	326104	295548	181942	256054	184166	155061	315789	399907	281809	313559	217752	196325	481287	403922	154849	286895	200670	180537	343139	319544	416252	414401
M150T227	Racemethionine	150.059	227.4	149.051	1.82867	C5H11NO2S	[M+H]+	Carboxylic acids and derivatives	Amino acids, peptides, and analogues	C01733		59-51-8	HMDB0033951	MoNA	1	pos	149054	187657	272094	161505	162771	316225	311054	235115	289448	246254	219461	180685	257944	267757	294443	283863	195475	232491	289844	201070	227415	154330	219728	198280
M171T50	Dichlobenil	170.962	50.4	170.964	16.378	C7H3Cl2N	[M]+			C11040		1194-65-6		MoNA	1	pos	587546	555597	607788	543877	311056	263678	329009	325425	448271	521201	455940	388568	34662.1	41436.6	25425.3	32086.2	1.05505e+06	1.15897e+06	997136	1.08748e+06	520839	472093	516808	379263
M171T380	Levetiracetam	171.118	380.3	170.106	27.445	C8H14N2O2	[M+H]+	Carboxylic acids and derivatives	Amino acids, peptides, and analogues	C07841		102767-28-2	HMDB0015333	MoNA	1	pos	225480	202336	207417	494776	378358	333706	111599	558671	386814	292007	375171	480455	355896	351658	356287	375210	271719	321014	338766	487065	544406	310162	433203	474038
M188T270	Dimethyltryptamine	188.129	270.1	188.131	14.3519	C12H16N2	[M]+	Indoles and derivatives	Tryptamines and derivatives	C08302		61-50-7	HMDB0005973	MoNA	1	pos	1.33059e+06	1.3588e+06	1.1067e+06	1.29113e+06	973226	563786	1.04436e+06	818486	581122	1.01932e+06	754002	992379	648290	513471	1.09555e+06	559357	391683	454931	611441	273089	484231	1.43052e+06	331351	727746
M206T549	4-Octylphenol	206.167	549.5	206.167	0.485044	C14H22O	[M]+			C14132		1806-26-4		MoNA	1	pos	247676	183503	267661	546250	197222	297512	350938	70370.8	282011	227840	395116	241591	338852	469088	580917	467352	202267	517709	212627	237630	284603	610676	296997	374681
M208T307	flufenacet OXA	208.207	307.2	225.216	10.8834	C11H12FNO3	[M+H-H2O]+	Carboxylic acids and derivatives	Carboxylic acid derivatives					MoNA	1	pos	338169	327506	309395	280957	397526	387141	399379	388600	389337	377233	356766	374781	396461	385784	408751	388435	351312	400842	374518	399227	403962	341675	401562	370476
M211T516	Bisphenol A	211.109	515.9	228.115	7.26639	C15H16O2	[M+H-H2O]+	Benzene and substituted derivatives	Diphenylmethanes	C13624	Xenobiotics biodegradation and metabolism; Global and overview maps	80-05-7	HMDB0032133	MoNA	1	pos	7.98676e+06	6.06277e+06	9.61708e+06	3.82987e+06	5.47475e+06	9.79807e+06	4.28306e+06	6.9071e+06	4.59032e+06	3.33756e+06	4.19366e+06	3.08707e+06	3.87861e+06	3.32632e+06	3.89057e+06	1.02629e+07	8.95382e+06	6.00392e+06	5.35033e+06	4.26714e+06	5.23299e+06	6.37318e+06	5.95627e+06	4.93175e+06
M231T526	Aminophenazone	231.138	525.8	231.137	4.32642	C13H17N3O	[M]+	Azoles	Pyrazoles	C07539		58-15-1	HMDB0015493	MoNA	1	pos	783730	1.01951e+06	303441	498983	101820	520902	640741	469144	383018	102791	98805.4	225493	245239	2.04632e+06	161476	369242	282009	304592	537792	466464	297814	228538	344201	227612
M251T453	4,4?-Dichlorobenzophenone	251.001	452.7	249.995	6.75789	C13H8Cl2O	[M+H]+			C06643		90-98-2		MoNA	1	pos	230077	388897	851855	613490	708784	401616	428612	403630	259530	402038	402766	550769	291012	393854	1.01559e+06	509788	285483	642077	367064	845817	2.86124e+06	1.1305e+06	192554	277827
M254T502	Dextromethorphan	254.184	502.4	271.194	7.73455	C18H25NO	[M+H-H2O]+	Morphinans		C06947		125-71-3	HMDB0001920	MoNA	1	pos	4.92434e+06	6.10272e+06	6.37241e+06	5.12657e+06	6.47888e+06	8.55741e+06	5.14146e+06	4.56947e+06	2.19531e+06	2.66934e+06	2.50389e+06	2.3408e+06	5.76816e+06	3.63719e+06	5.18698e+06	4.77582e+06	2.38866e+06	3.06341e+06	3.12516e+06	3.56211e+06	5.24732e+06	6.06537e+06	5.11088e+06	5.95409e+06
M272T419	N-lauroylsarcosine	272.222	419.5	271.215	0.0726907	C15H29NO3	[M+H]+					97-78-9		MoNA	1	pos	865569	533641	717565	518535	631785	664118	552807	464404	458846	344147	697251	364558	722177	469909	569055	338193	495706	693902	590616	532795	430627	449872	454292	770072
M289T516	Imazamethabenz-methyl	289.154	516.2	288.147	1.96608	C16H20N2O3	[M+H]+	Benzene and substituted derivatives	Benzoic acids and derivatives	C11494		81405-85-8	HMDB0034913	MoNA	1	pos	3.56333e+06	3.42845e+06	3.27491e+06	3.85943e+06	1.65684e+06	1.58049e+06	1.75197e+06	1.5091e+06	1.71781e+06	1.90773e+06	1.97008e+06	1.64523e+06	520481	550505	463823	1.8015e+06	2.95532e+06	2.99198e+06	2.80562e+06	2.84757e+06	2.10616e+06	1.82103e+06	1.88506e+06	2.08461e+06
M293T451	Edifenphos	293.015	451	310.025	7.73338	C14H15O2PS2	[M+H-H2O]+	Benzene and substituted derivatives		C14436		17109-49-8	HMDB0031781	MoNA	1	pos	54017.7	38247	60624.2	69232.1	60123.8	72799.3	53830.6	65196	70722.2	45430.9	86843	58569.3	61432.6	64974	55020.1	50895.5	62223.4	30421.1	64737.9	42137.5	56569.9	71522.3	40116.2	70417.6
M297T40	Hydrochlorothiazide	296.971	40.2	296.964	20.204	C7H8ClN3O4S2	[M]+	Thiadiazines	Benzothiadiazines	C07041		58-93-5	HMDB0001928	MoNA	1	pos	189221	155677	174785	202771	222775	183723	201088	135697	196027	172169	261494	152600	177842	191588	257106	139955	255297	163317	153227	170840	170726	185898	65562	135350
M321T305	Iprovalicarb	321.223	305.3	320.426	17.5306	C18H28N2O3	[M+H]+	Carboxylic acids and derivatives	Carboxylic acid derivatives					MoNA	1	pos	1.69665e+08	2.09158e+07	1.25721e+08	1.36363e+08	9.59857e+07	1.27756e+08	2.02633e+07	1.04557e+08	1.79771e+07	7.14198e+07	2.70759e+07	8.828e+07	7.59398e+07	8.1767e+07	2.16604e+07	9.80593e+07	2.29469e+07	1.70637e+08	1.98666e+07	1.0234e+08	7.48056e+07	7.55348e+07	8.75682e+07	1.13088e+08
M328T441	XLR11 N-(4-HYDROXYPENTYL)	328.213	441	345.21	29.3305	C21H28FNO2	[M+H-H2O]+							MoNA	1	pos	434025	326491	373498	460190	520276	571090	526688	356297	477746	405097	671341	431029	558876	515208	482892	438527	520341	272212	483674	320502	387409	348964	222472	340555
M340T607_2	canadine	340.392	607.2	339.385	2.27973	C20H21NO4	[M+H]+	Organooxygen compounds	Ethers			522-97-4/		MoNA	1	pos	4.35375e+07	3.75753e+07	7.30518e+07	4.1995e+07	6.81776e+07	6.47577e+07	1.3961e+07	9.79933e+07	3.82046e+07	4.38926e+07	4.55968e+07	3.58929e+07	1.5584e+07	1.391e+07	1.66033e+07	1.48882e+07	6.81765e+07	9.00083e+07	9.32854e+07	8.57608e+07	3.57186e+07	1.16568e+07	3.50178e+07	1.81365e+06
M366T60	Brevianamide B	366.185	59.6	365.174	10.3292	C21H23N3O3	[M+H]+	Azaspirodecane derivatives				38136-92-4	HMDB0030380	MoNA	1	pos	30548.3	7215	56114.7	36552.4	23756.6	34872	19902.2	245575	18208.8	16595.5	131233	195226	13034.6	9213.05	159493	34399.6	161976	4831.43	58378.5	30297.8	115346	192401	127576	181831
M370T262_3	Amisulpride	370.496	261.9	369.479	26.5158	C17H27N3O4S	[M+H]+	Organooxygen compounds	Ethers			71675-85-9/53583-79-2	HMDB0015633	MoNA	1	pos	4.64755e+06	5.12189e+06	5.56198e+06	4.85544e+06	5.03279e+06	3.82801e+06	730865	4.85037e+06	6.08186e+06	4.52306e+06	6.68811e+06	5.22401e+06	3.8668e+06	4.90539e+06	4.45151e+06	5.67049e+06	4.56291e+06	5.09401e+06	7.83674e+06	8.45107e+06	1.00365e+07	8.74076e+06	6.61478e+06	3.89204e+06
M389T646	azoxystrobin acid	389.363	645.6	389.361	5.1366	C21H15N3O5	[M]+	Organooxygen compounds	Ethers					MoNA	1	pos	2.29214e+06	1.2632e+06	4.81947e+06	3.91824e+06	4.34336e+06	1.63395e+06	3.73576e+06	2.64409e+06	2.76482e+06	1.95533e+06	3.03783e+06	4.94492e+06	4.40376e+06	1.82331e+06	8.41193e+06	3.84483e+06	2.09961e+06	3.93959e+06	8.49666e+06	9.51831e+06	8.73636e+06	1.10235e+07	1.96585e+06	1.72475e+06
M387T49	Thifensulfuron-methyl	387.04	48.8	387.031	23.2534	C12H13N5O6S2	[M]+			C10957		79277-27-3		MoNA	1	pos	137985	108378	119516	162006	148437	166802	146059	151976	148739	113186	138266	134723	163954	135227	131674	121543	161630	86830.7	148934	114021	120197	87800.3	82601.7	115403
M414T48	Rimsulfuron	414.043	48.5	431.057	15.6167	C14H17N5O7S2	[M+H-H2O]+			C10952		122931-48-0		MoNA	1	pos	251502	233167	1.10912e+06	1.14418e+06	1.03246e+06	328457	1.14038e+06	717652	398495	635970	1.38545e+06	164597	1.26603e+06	1.02363e+06	1.01772e+06	221670	1.19564e+06	133688	1.01337e+06	568057	733843	814967	647913	716021
M417T464_1	Spironolactone	417.217	464	416.202	18.2004	C24H32O4S	[M+H]+	Steroids and steroid derivatives	Steroid lactones	C07310		52-01-7	HMDB0014565	MoNA	1	pos	2.25298e+06	234546	1.09349e+07	491567	5.31166e+06	1.4861e+07	1.62936e+07	320909	115627	7.47024e+06	3.90142e+06	1.65647e+07	854346	131684	2.54675e+07	1.17057e+07	7.70121e+06	254933	224631	9.12765e+06	2.17236e+06	1.73454e+07	2.11764e+07	5.42483e+06
M427T49	perfluorooctyl phosphate	427.078	48.8	444.084	2.8894	C8H6F13O4P	[M+H-H2O]+	Organic phosphoric acids and derivatives	Phosphate esters					MoNA	1	pos	478622	553217	622064	586298	592415	574100	626822	401907	562755	693751	1.00847e+06	366407	591845	483344	562378	536754	838796	305621	580357	490909	386189	568332	71298	569334
M437T281_3	Fipronil	436.949	280.6	435.939	6.44829	C12H4Cl2F6N4OS	[M+H]+			C11099		120068-37-3		MoNA	1	pos	487141	357436	205354	496998	387466	707109	695409	597958	649883	267495	809474	344682	536974	722653	363880	543294	463214	268474	519297	466127	538360	411986	217479	289226
M448T456	oxaline	448.205	456.4	447.486	15.7734	C24H25N5O4	[M+H]+	Carboxylic acids and derivatives	Carboxylic acid derivatives			55623-37-5/		MoNA	1	pos	977365	600122	1.17455e+06	323606	447909	502532	480271	492357	65163.3	29531	41630.6	21573.5	20622.4	33164.5	6689.34	64355.1	899582	1.14433e+06	1.13399e+06	1.26726e+06	250586	190084	85010.8	65574.7
M470T590	N-arachinoyl-5-hydroxytryptamide	470.4	590.3	470.387	17.7569	C30H50N2O2	[M-H2O+NH4]+							MoNA	1	pos	1.2885e+07	1.11233e+07	9.01093e+06	6.25326e+06	227402	246107	366680	173483	154903	313464	373175	72649	1.81944e+06	1.86301e+06	1.95856e+06	62816.4	1.17063e+07	2.07628e+07	2.1878e+07	1.7831e+07	121524	922249	1.26884e+06	4.392e+06
M498T650	N-behenoyl-5-hydroxytryptamide	498.429	650.2	498.419	20.1693	C32H54N2O2	[M-H2O+NH4]+							MoNA	1	pos	1.58993e+06	1.3192e+06	1.52137e+06	1.10768e+06	982518	1.08236e+06	896190	967189	650017	762989	676074	703807	1.33405e+06	1.10241e+06	960018	1.15902e+06	377255	450258	658876	704917	2.26365e+06	1.43683e+06	3.01415e+06	2.62833e+06
M526T611_2	N-lignoceroyl-5-hydroxytryptamide	526.441	610.8	526.45	17.5311	C34H58N2O2	[M]+							MoNA	1	pos	7.89163e+07	7.79095e+07	1.7364e+08	9.27238e+07	7.28438e+07	1.36578e+08	2.1229e+07	9.88973e+07	8.69055e+07	9.0558e+07	5.35079e+07	4.8982e+07	5.20604e+07	5.53677e+07	3.00735e+07	5.30978e+07	3.93333e+07	7.34217e+07	1.76021e+08	1.59322e+08	1.03462e+08	1.16582e+08	1.72966e+07	1.54459e+07
M562T516	Ergocorninine	562.299	515.5	561.295	6.39402	C31H39N5O5	[M+H]+					564-36-3		MoNA	1	pos	266633	37537.5	684746	50636	736007	170604	1.60201e+06	22169.3	146322	1.02951e+06	34733.6	114502	29087.9	9293.75	43293.5	163778	313194	24177	48094.6	306834	6955.93	106861	644795	1.17574e+06
M548T419	Ergosine	548.285	419.4	547.279	3.91272	C30H37N5O5	[M+H]+			C09167		561-94-4		MoNA	1	pos	1.7922e+06	437710	1.56965e+06	161526	1.79624e+06	606077	1.58737e+06	323365	1.04582e+06	769362	557787	390508	272639	154770	467042	300524	1.78226e+06	213017	340149	899858	89164.4	454320	1.37188e+06	3.0279e+06
M577T546	(-)-Stercobilin	577.331	546.2	594.342	5.02522	C33H46N4O6	[M+H-H2O]+	Tetrapyrroles and derivatives	Bilirubins				HMDB0240259	MoNA	1	pos	450091	5725.27	976044	67964.5	298408	943258	1.24252e+06	13857.2	13271.1	1.01156e+06	64708.8	1.10373e+06	232983	12124.6	1.29226e+06	1.01485e+06	633595	45494.8	22882	1.03101e+06	3619.74	1.4334e+06	1.4063e+06	80137
M594T445_1	Ergocristam	594.31	444.8	593.3	3.7342	C35H39N5O4	[M+H]+					50868-53-6		MoNA	1	pos	333061	306806	136943	337908	164058	241412	249274	293997	192461	291029	227331	211662	272910	236625	224252	136721	575268	581573	410657	486665	226947	203135	189163	186070
M654T307	Enniatin B1	654.436	307.4	653.425	5.79664	C34H59N3O9	[M+H]+					19914-20-6		MoNA	1	pos	248831	185087	304134	335328	187518	73214	120442	356694	492892	199714	317256	153515	271149	177889	630160	139080	133006	197573	114229	219336	214595	276471	2128.01	382542
M668T296_3	enniatin A1	668.444	296.4	667.874	6.66703	C35H61N3O9	[M+H]+	Carboxylic acids and derivatives	Amino acids, peptides, and analogues			4530-21-6/		MoNA	1	pos	2.03746e+06	1.14489e+06	1.8216e+06	1.07216e+06	1.00697e+06	1.54874e+06	1.37864e+06	1.00996e+06	1.43155e+06	1.17882e+06	822853	734481	1.20748e+06	1.30938e+06	1.81273e+06	1.35602e+06	3.3588e+06	3.39502e+06	3.28613e+06	3.12943e+06	851350	1.40437e+06	779075	1.44289e+06
M721T479_1	Ritonavir	721.322	478.7	720.313	2.52869	C37H48N6O5S2	[M+H]+	Carboxylic acids and derivatives	Amino acids, peptides, and analogues	C07240	Digestive system	155213-67-5	HMDB0014646	MoNA	1	pos	367836	155034	575678	962055	758949	1.04183e+06	350574	793074	343911	249973	307418	282596	335495	246061	196773	613753	353149	436533	379522	463215	288986	266324	139805	67617.8
M706T515_2	Theionbrunonine A	706.337	515.3	706.355	26.159	C42H50N4O4S	[M]+							MoNA	1	pos	1.51329e+06	1.07256e+06	1.33071e+06	566569	86236.1	62736.1	39956.9	75477.5	1.23321e+06	1.1312e+06	942532	978269	51342.9	45986.2	73130.8	39363.7	2.11584e+06	1.92144e+06	2.33275e+06	3.73275e+06	633680	520971	239988	1.57627e+06
M774T49_1	Iopromide	774.12	49.2	791.112	20.325	C18H24I3N3O8	[M+H-H2O]+	Carboxylic acids and derivatives	Carboxylic acid derivatives			73334-07-3	HMDB0041910	MoNA	1	pos	984471	1.29255e+06	1.54772e+06	1.19807e+06	567176	1.08903e+06	1.25334e+06	1.18489e+06	576173	542451	946175	514432	780505	856852	802367	616111	915037	1.24818e+06	1.74194e+06	1.01947e+06	718962	1.22297e+06	1.35781e+06	1.64306e+06
M852T464_2	Triacetylfusarinin C	852.411	463.9	852.412	0.780398	C39H60N6O15	[M]+							MoNA	1	pos	383149	392045	399211	391414	317174	431845	438925	256334	459497	352058	332811	248862	238300	283547	249066	216747	318884	265596	335826	297729	255200	260090	70020.2	157889
M857T520_1	Methoxy-MCA-Albicidin	857.294	520.1	856.27	19.3671	C45H40N6O12	[M+H]+							MoNA	1	pos	205105	336455	148984	252916	27406.1	20766.1	16922	37162.1	598588	1.06083e+06	1.15044e+06	1.30089e+06	638040	573840	1.29044e+06	605357	407974	513094	369765	532269	491885	455012	270602	260494
M913T272_2	SurugamideA	912.62	272.4	911.621	8.53208	C48H81N9O8	[M+H]+							MoNA	1	pos	3.03169e+06	918871	940344	697573	443238	469820	390699	255408	492283	449222	727664	229115	1.32066e+06	494437	1.68603e+06	222812	6.39852e+06	1.39099e+07	1.15491e+07	9.54884e+06	2.35992e+06	2.55664e+06	929965	3.3495e+06
M102T72	1-Aminocyclopropanecarboxylic acid	102.091	72.3	101.048	0.772781	C4H7NO2	[M+H]+	Carboxylic acids and derivatives	Amino acids, peptides, and analogues	C01234	Chemical structure transformation maps; Amino acid metabolism; Global and overview maps	22059-21-8	HMDB0036458	BioDeepDB	1	pos	2.07065e+06	1.74478e+06	2.06473e+06	1.30036e+06	2.80234e+06	1.90913e+06	3.65829e+06	1.96394e+06	1.90357e+06	1.88882e+06	3.43893e+06	2.72979e+06	932035	1.96603e+06	1.72091e+06	2.45977e+06	1.58904e+06	1.76793e+06	1.47612e+06	1.87815e+06	8.04915e+06	2.13201e+06	1.05252e+06	1.71175e+06
M148T47	Mevalonic acid	148.097	47.5	148.074	4.98132	C6H12O4	[M+H]+	Fatty Acyls	Fatty acids and conjugates	C00418	Chemical structure transformation maps; Cell growth and death; Global and overview maps; Metabolism of terpenoids and polyketides	150-97-0/17817-88-8	HMDB0000227	BioDeepDB	1	pos	4.01208e+06	3.55379e+06	4.18649e+06	4.62842e+06	987803	981687	1.06865e+06	967386	1.12416e+06	1.3427e+06	1.35296e+06	1.05696e+06	187328	229543	139349	980100	2.93807e+06	2.96027e+06	2.90298e+06	2.77152e+06	1.51071e+06	1.57849e+06	1.44177e+06	1.41376e+06
M161T260	Tryptamine	161.108	259.7	160.1	2.63178	C10H12N2	[M+H]+	Indoles and derivatives	Tryptamines and derivatives	C00398	Biosynthesis of other secondary metabolites; Signaling molecules and interaction; Amino acid metabolism; Chemical structure transformation maps; Global and overview maps	61-54-1	HMDB0000303	BioDeepDB	1	pos	37754.8	31261.3	30953.3	35793.1	29934.8	31616.5	26545.3	28024.8	28502.6	32431.5	27471.3	30127.4	25114.1	29283.6	26281.1	33646.3	540314	1.05552e+06	491007	681086	428663	497048	426112	516793
M170T582	1-Methylhistidine	170.095	581.8	169.085	17.7783	C7H11N3O2	[M+H]+	Carboxylic acids and derivatives	Amino acids, peptides, and analogues	C01152	Amino acid metabolism; Global and overview maps	332-80-9/368-16-1	HMDB0000001	BioDeepDB	1	pos	601661	493090	1.43096e+06	512405	2.64078e+06	986838	2.61899e+06	670529	2.32942e+06	2.16859e+06	718105	1.44434e+06	1.41206e+06	1.18059e+06	763391	2.10394e+06	1.22539e+06	905153	1.0485e+06	600362	646234	1.40633e+06	720263	497876
M180T59	S-Carboxymethyl-L-cysteine	180.034	59.3	179.025	9.43587	C5H9NO4S	[M+H]+			C03727		638-23-3		BioDeepDB	1	pos	2.02316e+07	7.58072e+06	2.87419e+06	3.44414e+06	2.94657e+06	2.57379e+06	1.07918e+07	2.7779e+06	3.2492e+06	3.70389e+06	3.539e+06	3.26267e+06	2.08964e+06	3.45882e+06	2.68164e+06	2.9457e+06	1.42262e+07	1.48778e+07	2.13582e+07	1.16398e+07	1.2728e+07	9.59343e+06	1.56374e+07	8.91673e+06
M195T237	Caffeine	195.088	237.2	194.08	2.17338	C8H10N4O2	[M+H]+	Imidazopyrimidines	Purines and purine derivatives	C07481	Chemical structure transformation maps; Biosynthesis of other secondary metabolites; Global and overview maps	58-08-2	HMDB0001847	BioDeepDB	1	pos	635915	654594	602886	737654	639529	681946	617532	629772	2.93256e+06	2.06625e+06	1.75259e+06	1.85135e+06	413265	347631	623297	615708	584898	562387	640711	791511	309706	383847	609766	457131
M197T252	Gluconic acid	197.082	251.6	196.058	3.50214	C6H12O7	[M+H]+	Organooxygen compounds	Carbohydrates and carbohydrate conjugates	C00257	Carbohydrate metabolism; Global and overview maps	526-95-4	HMDB0000625	BioDeepDB	1	pos	327014	567402	246276	509152	527010	494223	482673	443624	290793	316873	252616	395437	384097	377966	333386	337913	993929	900367	1.29709e+06	1.19969e+06	340947	352280	338131	301357
M209T48_2	3-Nitro-L-tyrosine	209.05	48.2	226.059	8.44775	C9H10N2O5	[M+H-H2O]+					621-44-3	HMDB0001904	BioDeepDB	1	pos	388568	235963	397410	286051	410526	356190	223624	234342	264425	360979	333192	232576	358313	274989	308257	373361	222903	326452	379813	261217	195312	346390	20778.9	39946.3
M222T51	N-Acetylmannosamine	222.098	50.5	221.09	0.48268	C8H15NO6	[M+H]+	Organooxygen compounds	Carbohydrates and carbohydrate conjugates	C00645	Carbohydrate metabolism; Glycan biosynthesis and metabolism; Global and overview maps	7772-94-3/3615-17-6	HMDB0001129	BioDeepDB	1	pos	1.7815e+06	1.68278e+06	1.53483e+06	1.94765e+06	1.71738e+06	1.63171e+06	1.96287e+06	1.05902e+06	2.0096e+06	1.94326e+06	1.73929e+06	1.45024e+06	1.83832e+06	1.34784e+06	2.16003e+06	2.09766e+06	1.45926e+06	2.03846e+06	2.12691e+06	1.84478e+06	2.02284e+06	1.39159e+06	1.67184e+06	1.99159e+06
M291T390	Catechin	291.085	389.8	290.079	3.69651	C15H14O6	[M+H]+	Flavonoids	Flavans	C06562	Chemical structure transformation maps; Biosynthesis of other secondary metabolites; Global and overview maps	154-23-4	HMDB0002780	BioDeepDB	1	pos	793383	697609	720293	724449	729336	690421	671220	622018	688194	718338	1.12528e+06	892506	746216	758981	736864	699520	772972	976537	832428	782743	799972	777018	826366	741628
M307T352	(-)-Epigallocatechin	307.082	351.8	306.074	1.03577	C15H14O7	[M+H]+	Flavonoids	Flavans	C12136	Biosynthesis of other secondary metabolites; Global and overview maps	970-74-1	HMDB0038361	BioDeepDB	1	pos	110520	96611.7	109063	130949	88451.8	93331.7	92898.4	84703.7	78464.3	150134	234233	105163	55867.9	87157.8	137511	88307.7	63432.9	145794	78728	100893	106010	93371.8	89097.3	67251.3
M352T362	Adenosine 2',3'-cyclic phosphate	352.038	362.1	329.053	11.1295	C10H12N5O6P	[M+Na]+	Purine nucleotides	Cyclic purine nucleotides	C02353	Global and overview maps; Nucleotide metabolism	634-01-5	HMDB0011616	BioDeepDB	1	pos	166249	168380	151985	208478	313773	43559.4	123131	163701	253378	92943	264174	189149	195201	231714	103567	420842	575169	86787.8	458516	117256	169255	186946	128913	91682.5
M360T315	beta-Lactose	360.157	314.7	342.116	12.9284	C12H22O11	[M]+	Carbohydrates and carbohydrate conjugates	Glycosyl compounds	C01970		5965-66-2	HMDB0041627	BioDeepDB	1	pos	52495.2	56420.7	47977.2	5930.07	43558.8	3103.39	63848.5	36049	78090.4	45704.4	21498.1	14039	65381.8	12315.4	87406.7	32887.9	77394.2	80177.8	45024.5	54802.3	74941.5	72957.7	11009.1	50041.1
M363T532	Cortisol	363.219	532.3	362.209	5.84772	C21H30O5	[M+H]+	Steroids and steroid derivatives	Hydroxysteroids	C00735	Endocrine and metabolic disease; Cancer: overview; Excretory system; Digestive system; Endocrine system; Lipid metabolism; Signaling molecules and interaction; Cancer: specific types; Target-based classification: Nuclear receptors; Global and overview maps	50-23-7	HMDB0000063	BioDeepDB	1	pos	649439	535274	1.01732e+06	849846	468801	759253	567902	563648	400491	559197	804269	480424	435472	295296	397792	443410	423343	871390	618295	721992	423951	509704	465371	557671
M518T464	Sodium taurocholate	518.309	463.9	537.274	10.4626	C26H44NNaO7S	[M+H]+					145-42-6		BioDeepDB	1	pos	129338	239188	175571	404626	375803	1.38162e+06	1.77342e+06	602711	684241	1.0172e+06	1.48043e+06	1.26588e+06	1.76061e+06	811288	492561	563257	919312	539695	1.35737e+06	745633	1.72956e+06	363893	497250	669828
M526T426	3,5-Diiodothyronine	525.89	426.4	524.893	15.338	C15H13I2NO4	[M+H]+	Carboxylic acids and derivatives	Amino acids, peptides, and analogues			1041-01-6/534-51-0	HMDB0000582	BioDeepDB	1	pos	6.5153e+06	1.81761e+06	2.75093e+06	2.06918e+06	2.69601e+06	1.90095e+06	1.23951e+06	1.39348e+06	810378	814241	605693	833432	1.6264e+06	1.24127e+06	1.1953e+06	1.39226e+06	281773	1.32821e+06	1.12708e+06	1.1513e+06	2.64291e+06	2.37278e+06	3.76077e+06	3.42365e+06
M608T454_1	Diosmin	608.19	453.8	608.174	7.60288	C28H32O15	[M-H2O+NH4]+	Flavonoids	Flavonoid glycosides	C10039		520-27-4	HMDB0029548	BioDeepDB	1	pos	571800	1.92549e+06	1.84002e+06	1.87858e+06	640794	1.80333e+06	1.37128e+06	1.22824e+06	1.55845e+06	529718	560679	1.31427e+06	2.06448e+06	1.84563e+06	1.18977e+06	1.25069e+06	674367	647673	1.26401e+06	585738	545349	635381	513536	1.1805e+06
M647T690	Uridine diphosphate glucuronic acid	647.453	689.6	580.034	4.77819	C15H22N2O18P2	[M+H]+	Pyrimidine nucleotides	Pyrimidine nucleotide sugars	C00167	Carbohydrate metabolism; Glycan biosynthesis and metabolism; Global and overview maps	2616-64-0/63700-19-6	HMDB0000935	BioDeepDB	1	pos	1.37522e+06	1.81129e+06	532008	1.50488e+06	682872	702098	907312	822467	549450	667454	258919	219069	470167	490775	1.22499e+06	1.01219e+06	333158	524566	1.1036e+06	510916	1.3444e+06	1.22452e+06	490299	355171
M851T464_2	3-Methylcrotonyl-CoA	851.388	463.9	849.157	11.5684	C26H42N7O17P3S	[M+H]+	Fatty Acyls	Fatty acyl thioesters	C03069	Amino acid metabolism; Global and overview maps; Metabolism of terpenoids and polyketides	793193-48-3	HMDB0001493	BioDeepDB	1	pos	1.4746e+06	482040	656011	880126	2.86657e+06	2.20611e+06	2.60189e+06	2.9298e+06	1.37104e+06	567560	462322	1.7714e+06	1.10939e+06	291350	1.26808e+06	283407	2.60831e+06	1.13653e+06	1.74454e+06	2.24458e+06	290695	362429	1.06334e+06	407217
M103T604	Ethylmethylacetic acid	103.076	603.6	102.068	2.17316	C5H10O2	[M+H]+	Fatty Acyls	Fatty acids and conjugates	C18319	Digestive system	116-53-0	HMDB0002176	BioDeepDB	1	pos	3.41943e+06	2.18673e+06	4.15853e+06	2.96117e+06	3.80362e+06	3.74346e+06	629925	7.05984e+06	1.39225e+06	2.8504e+06	6.35815e+06	1.24407e+06	2.93817e+06	2.4511e+06	4.6742e+06	1.98843e+06	1.59217e+06	486951	5.56169e+06	436382	1.01933e+06	764286	168852	389956
M162T49	L-Carnitine	162.113	48.5	161.105	1.18025	C7H15NO3	[M+H]+	Organonitrogen compounds	Quaternary ammonium salts	C00318	Environmental adaptation; Digestive system	541-15-1	HMDB0000062	BioDeepDB	1	pos	2.18411e+06	1.38422e+06	1.95131e+06	1.77757e+06	1.25515e+06	1.03902e+06	1.34945e+06	1.14775e+06	452617	637380	156942	458073	69004.4	91607.5	197805	59420.9	4.38072e+06	5.70436e+06	4.17173e+06	4.54402e+06	817959	1.04209e+06	984393	1.15103e+06
M182T72	L-Tyrosine	182.082	72.3	181.074	1.48645	C9H11NO3	[M+H]+	Carboxylic acids and derivatives	Amino acids, peptides, and analogues	C00082	Cancer: overview; Metabolism of cofactors and vitamins; Metabolism of other amino acids; Chemical structure transformation maps; Nervous system; Endocrine system; Digestive system; Neurodegenerative disease; Biosynthesis of other secondary metabolites; Translation; Metabolism of terpenoids and polyketides; Amino acid metabolism; Substance dependence; Energy metabolism; Global and overview maps	60-18-4	HMDB0000158	BioDeepDB	1	pos	1.38914e+06	1.48816e+06	1.08995e+06	1.37946e+06	1.93269e+06	1.44926e+06	957034	1.28117e+06	1.56472e+06	1.46454e+06	1.17988e+06	1.07673e+06	1.56823e+06	1.4663e+06	1.48029e+06	2.12734e+06	2.05378e+06	854148	924155	1.51043e+06	2.05656e+06	1.1403e+06	1.21893e+06	1.97348e+06
M180T49	Fructose-1P	180.087	48.8	180.063	0.147362	C6H12O6	[M]+	Carbohydrates and carbohydrate conjugates	Monosaccharides	C10906		57-48-7	HMDB0062538	BioDeepDB	1	pos	849710	1.00086e+06	1.68049e+06	2.29959e+06	1.07475e+06	700399	601681	886714	700248	673703	756834	1.2317e+06	623432	1.16996e+06	1.5746e+06	1.14377e+06	545860	1.54218e+06	1.15908e+06	2.16895e+06	4.98665e+06	1.87107e+06	670039	789905
M285T485	Biochanin A	285.076	485	284.068	0.067656	C16H12O5	[M+H]+	Isoflavonoids	O-methylated isoflavonoids	C00814	Chemical structure transformation maps; Biosynthesis of other secondary metabolites; Global and overview maps	491-80-5	HMDB0002338	BioDeepDB	1	pos	551197	424755	583314	416697	411705	254615	355658	366515	313499	293569	14546.8	229149	341295	185148	323234	402249	354720	470635	444070	389960	390915	419330	372067	258301
M432T624	Chenodeoxycholic acid glycine conjugate	432.304	623.5	449.314	6.86092	C26H43NO5	[M+H-H2O]+	Steroids and steroid derivatives	Bile acids, alcohols and derivatives	C05466		640-79-9	HMDB0000637	BioDeepDB	1	pos	3.66308e+06	1.95643e+06	1.85196e+06	2.3759e+06	962888	840582	2.57852e+06	1.73773e+06	186856	921670	321713	293203	1.92441e+06	237747	461858	313321	229037	184726	137491	123786	286713	323282	79097.8	411437
M451T48_2	Cyanidin 3-glucoside	451.116	48	449.108	4.09087	C21H21O11	[M+H]+	Flavonoids	Flavonoid glycosides	C08604	Biosynthesis of other secondary metabolites	7084-24-4	HMDB0030684	BioDeepDB	1	pos	12163.1	292697	44612.9	31575.5	12797.2	14703.8	12047.2	5581.92	1.77315e+06	26769.2	28552.2	17347.7	16099.3	12910.4	476428	213275	3.90673e+06	3.26151e+07	431850	1.4953e+06	1.65513e+06	7.83203e+06	2.63586e+06	1.78417e+07
M825T492_3	Rifampicin	825.416	491.9	822.405	4.01194	C43H58N4O12	[M+H]+			C06688	Digestive system	13292-46-1		BioDeepDB	1	pos	546617	419050	587745	405954	244499	154532	138307	65116.2	114632	114059	113972	107266	51904.2	40089.2	19470.9	12030.9	793450	1.01715e+06	1.16069e+06	674367	113390	213667	76505.6	139172
M133T76	MLS000515960-01!	133.106	75.8	150.116	20.0175	C9H14N2	[M+H-H2O]+							GNPS	1	pos	29923.7	7822.13	94197.1	72167.1	23511.1	5539.83	29356.6	8081	15619.2	13440.8	26611.4	356344	5540.94	7274.36	47059.9	9752.36	12688.3	41787	22290.6	30523.2	7867.33	23257.7	7246.52	6201.53
M134T47	N(6)-hydroxyadenine	134.118	46.7	151.126	6.45701	C5H5N5O	[M+H-H2O]+					5667-20-9/		GNPS	1	pos	1.96493e+06	5.53261e+06	7.28398e+06	3.12768e+06	6.70623e+06	3.89282e+06	6.74071e+06	1.02047e+07	3.76962e+06	1.78098e+06	8.37121e+06	7.20826e+06	6.77704e+06	8.01059e+06	3.99657e+06	5.09307e+06	6.94254e+06	8.1937e+06	7.50773e+06	5.90875e+06	3.0341e+06	3.26511e+06	3.66169e+06	2.60047e+06
M152T41_2	Chlorzoxazone	151.984	40.5	168.993	12.9356	C7H4ClNO2	[M+H-H2O]+	Benzoxazoles	Benzoxazolones	C07931		95-25-0	HMDB0014500	GNPS	1	pos	98953.7	330847	103776	170934	150616	245893	357213	77522	308111	166788	93968	91547	331040	184609	70300.5	255431	484021	341647	260666	229512	84318.6	68958.1	84403.7	85960.4
M164T321	Quinic acid	164.107	321.5	163.1	1.88879	C10H13NO	[M+H]+	Organooxygen compounds	Alcohols and polyols	C06746		77-95-2/877-95-2	HMDB0003072	GNPS	1	pos	121289	12920.5	63717.9	12628.3	47978.1	103016	96442.3	133909	83506	51414.2	17285.6	108151	77655.5	102205	85679.9	12262.4	98691.9	111974	90353.8	126321	104746	54330.9	56078.2	136310
M175T424	L-Theanine	175.112	423.7	174.1	25.5933	C7H14N2O3	[M+H]+	Carboxylic acids and derivatives	Amino acids, peptides, and analogues	C01047		3081-61-6	HMDB0034365	GNPS	1	pos	849276	669008	805840	643970	64473.3	110429	86503.6	58026.4	98604.5	356578	198739	442032	83091.1	474517	507167	120811	393947	1.35734e+06	387898	820883	921666	683912	586639	73650.3
M184T473	MLS001074086-01!	184.084	472.6	201.092	3.30182	C10H16ClNO	[M+H-H2O]+							GNPS	1	pos	613549	583647	703454	716634	640405	634351	751259	588927	537275	767233	591358	578301	568881	470039	547306	619068	524444	682984	614163	629289	526865	643677	688167	740493
M190T383	MLS002637604-01!phenyl(piperidin-1-yl)methanone	190.126	383.1	189.115	19.7758	C12H15NO	[M+H]+							GNPS	1	pos	1.27874e+06	856940	1.03721e+06	783389	1.39353e+06	1.28849e+06	982554	1.17251e+06	1.02841e+06	1.07236e+06	1.14045e+06	1.07124e+06	1.24191e+06	1.12582e+06	1.18487e+06	1.2308e+06	1.00509e+06	1.22262e+06	1.45069e+06	1.41787e+06	870175	1.23704e+06	34589.8	76780.6
M202T54	Aniracetam	202.083	53.8	219.089	4.12702	C12H13NO3	[M+H-H2O]+			C13355		72432-10-1		GNPS	1	pos	313278	429435	529470	555586	317590	403528	568355	385234	488567	385227	627565	362520	306658	339933	494222	387134	403531	424482	367931	518910	297309	365578	227168	273889
M205T270	4-Hydroxy-3-(3-methyl-2-butenyl)acetophenone	205.123	270.4	204.115	4.84707	C13H16O2	[M+H]+	Organooxygen compounds	Carbonyl compounds	C10702		26932-05-8/35816-89-8	HMDB0030770	GNPS	1	pos	42213	69001.8	465061	38815.6	31051.8	34241.1	345028	33837.1	26756.6	35564.2	28874.2	20275.7	20111.2	21142.1	16571.3	17606.9	1.45263e+06	2.80785e+06	628957	436631	760001	543706	484560	768877
M210T652	3-Methyl-1-(2,4,6-trihydroxyphenyl)-1-butanone	210.088	652.3	210.089	7.13988	C11H14O4	[M]+	Benzene and substituted derivatives	Phenols and derivatives	C07350		26103-97-9	HMDB0033798	GNPS	1	pos	49022.4	44962.4	79482.3	76717	895384	4.61905e+06	43527.2	56975	82846.5	2.13664e+06	202846	1.97256e+06	184645	196063	119111	596002	78954.5	138707	87163.1	68729.4	415871	455989	27788.9	26798.8
M232T48	MLS002172470-01!SKF-86466 hydrochloride	232.065	48.2	231.058	0.298019	C11H15Cl2N	[M+H]+							GNPS	1	pos	835243	304186	383671	271146	441936	309645	522282	261820	451804	491118	270114	329968	718719	355271	350078	328764	963799	335327	471593	941157	282086	303223	382567	503922
M235T296	NCGC00160280-01!N-methyl-metacryloyl-lupinine	235.19	295.6	252.196	7.77459	[C15H26NO2]+	[M+H-H2O]+							GNPS	1	pos	6.62253e+06	5.38821e+06	4.6744e+06	4.48639e+06	4.39451e+06	3.80361e+06	4.37909e+06	4.94401e+06	415133	1.54814e+06	286995	3.88965e+06	381254	424499	166325	323489	5.33518e+06	2.92856e+06	3.98905e+06	2.77097e+06	1.19863e+06	1.54497e+06	203757	293970
M241T444	Imiquimod	241.143	444.2	240.304	5.27699	C14H16N4	[M+H]+	Organonitrogen compounds	Amines			99011-02-6	HMDB0014862	GNPS	1	pos	626809	468608	611992	659981	670329	169242	944268	647389	365200	214708	220443	660644	835174	946036	1.21033e+06	609960	671167	403577	528281	558305	620118	981110	503152	404276
M243T340	NCGC00380346-01!2-(7-hydroxyoctyl)pentanedioic acid	243.157	340.1	260.162	8.88369	C13H24O5	[M+H-H2O]+							GNPS	1	pos	203830	195686	83822	193671	82512.5	157632	94821.5	149913	169523	106131	163255	123724	191024	167337	111050	92989.2	98036.1	652206	215248	187890	588686	217123	182494	65294.2
M244T370	NCGC00385670-01!N-(10-hydroxy-10-methylundecyl)acetamide	244.228	370.5	243.22	2.84502	C14H29NO2	[M+H]+							GNPS	1	pos	101072	61113.2	529728	115857	402447	312114	369857	330750	553443	625974	518064	456829	289698	118017	494596	481578	494214	611909	405608	360600	52679.1	52941.7	306504	70657.4
M245T424	(R)-flurbiprofen	245.267	423.8	244.261	3.65316	C15H13FO2	[M+H]+	Benzene and substituted derivatives	Halobenzenes			51543-40-9/		GNPS	1	pos	123386	61601.4	163776	115976	137248	140982	38440	83146.1	90175.6	133336	93822.9	120213	122958	89787.8	100223	148716	65017.8	86576.6	97824.7	67758.3	90011.1	85921.7	8345.22	42668.2
M245T299	NCGC00381248-01!4-oxododecanedioic acid	245.139	299.4	244.131	1.83676	C12H20O5	[M+H]+							GNPS	1	pos	390086	262042	295358	321197	353296	350022	323915	266628	336931	327847	403392	285418	381579	253414	325966	276871	373884	426355	329944	287112	255766	359250	358291	342140
M246T236	Pinacidil monohydrate	246.171	235.5	245.164	2.11889	C13H19N5	[M+H]+							GNPS	1	pos	461113	208182	413676	274478	479855	385444	1.16885e+06	234554	277049	427302	269728	243944	284967	401492	598452	380133	279056	2.03133e+06	289466	855696	314860	411277	379395	360942
M249T299_1	Makaluvamine N	248.985	298.5	265.992	1.13891	[C10H9BrN3O]+	[M+H-H2O]+							GNPS	1	pos	575674	609140	1.25513e+06	558940	1.29037e+06	1.12392e+06	70851.3	688773	527626	598133	570149	670577	1.90948e+06	705018	552646	838327	634607	653700	825867	505146	651242	730256	428527	231812
M258T610	Xanthoxyletin	258.27	610.2	258.269	3.09753	C15H14O4	[M]+	Organooxygen compounds	Ethers			84-99-1/		GNPS	1	pos	1.4116e+06	875985	1.07392e+06	1.21428e+06	1.94784e+06	1.99512e+06	1.86868e+06	1.33833e+06	2.25336e+06	1.81386e+06	2.10761e+06	1.92596e+06	1.95383e+06	1.88554e+06	1.96701e+06	1.49394e+06	1.68806e+06	1.01125e+06	1.72906e+06	1.42245e+06	1.78856e+06	1.22127e+06	1.10937e+06	1.41147e+06
M262T360	deoxy-PF1140	262.181	359.7	261.173	1.69739	C16H23NO2	[M+H]+							GNPS	1	pos	687045	693258	596280	541303	668288	712263	634776	672841	710271	646062	539270	571513	754641	673792	634122	663466	604858	655269	592057	659925	649165	315312	735111	667513
M283T287	Dihydrophaseic acid	283.154	286.7	282.147	0.353857	C15H22O5	[M+H]+	Prenol lipids	Sesquiterpenoids	C15971	Metabolism of terpenoids and polyketides	41756-77-8	HMDB0038660	GNPS	1	pos	1.67793e+06	2.33492e+06	3.57747e+06	467877	2.93113e+06	3.2423e+06	6.39022e+06	2.66257e+06	4.68402e+06	2.40084e+06	1.61281e+06	2.06262e+06	1.02042e+06	1.41986e+06	2.08706e+06	1.90312e+06	2.49381e+06	1.89533e+06	223578	1.26331e+06	1.93759e+06	1.94304e+06	36801.4	1.22779e+06
M265T177_2	NCGC00160338-01!ALLOMATRINE 1N-OXIDE	265.188	177.2	264.184	12.2706	C15H24N2O2	[M+H]+							GNPS	1	pos	5.69925e+06	8.05863e+06	5.52831e+06	6.47826e+06	3.68487e+06	4.95375e+06	4.88127e+06	3.39125e+06	5.44624e+06	3.97828e+06	5.63597e+06	4.30941e+06	3.04868e+06	2.06427e+06	3.15508e+06	5.04082e+06	4.841e+06	4.90972e+06	5.61394e+06	3.83055e+06	6.19873e+06	4.63844e+06	4.24243e+06	1.99431e+06
M265T349	(-)-Quebrachamine	265.201	348.7	282.21	4.77374	C19H26N2	[M+H-H2O]+	Quebrachamine alkaloids		C09235		4850-21-9	HMDB0030260	GNPS	1	pos	563840	564115	901843	663964	546247	564314	182385	549075	525093	380402	129005	163360	376979	255451	381123	456337	592736	565517	169727	634708	155114	725392	838641	260244
M268T54_2	Makaluvamine O	267.985	53.7	266.976	5.06739	[C10H8BrN2O2]+	[M+H]+							GNPS	1	pos	1.2829e+06	1.01478e+06	1.17609e+06	1.09329e+06	1.12327e+06	819339	1.28529e+06	622917	1.57597e+06	1.28463e+06	1.91852e+06	1.04075e+06	1.24156e+06	1.17917e+06	1.09803e+06	623720	2.26756e+06	1.50524e+06	1.51778e+06	1.92533e+06	1.55017e+06	1.72394e+06	867229	1.2196e+06
M270T629	pinostrobin	270.279	629.1	270.281	7.02977	C16H14O4	[M]+	Organooxygen compounds	Ethers					GNPS	1	pos	1.33404e+08	1.40828e+08	1.50706e+08	1.29911e+08	8.56595e+07	8.97315e+07	9.58408e+07	8.29046e+07	6.22831e+07	7.1555e+07	6.24174e+07	6.50302e+07	6.41437e+07	5.46311e+07	7.32007e+07	6.45729e+07	1.23882e+08	1.13188e+08	1.78515e+08	1.63839e+08	1.25209e+08	1.14164e+08	9.86144e+07	1.01225e+08
M271T49	NCGC00179780-02_C20H32O_(5xi,9xi)-Beyer-15-en-18-ol	271.238	49.1	288.245	0.301005	C20H32O	[M+H-H2O]+							GNPS	1	pos	3.59218e+06	5.3295e+06	1.17993e+07	4.06396e+06	5.4266e+06	6.74772e+06	2.84532e+06	9.34106e+06	2.99432e+06	3.85408e+06	6.69574e+06	6.65723e+06	3.00975e+06	3.4308e+06	5.25038e+06	6.68166e+06	5.62712e+06	2.2346e+06	5.7837e+06	4.63266e+06	3.05031e+06	1.12838e+07	3.56803e+06	554478
M272T629	1-deoxymethylsphinganine	272.287	629.1	271.482	29.7143	C17H37NO	[M+H]+	Organooxygen compounds	Alcohols and polyols					GNPS	1	pos	178977	772574	1.38883e+06	1.59777e+06	921522	769729	1.03854e+06	895109	786428	293634	655148	1.51666e+06	215750	220147	1.29233e+06	2.04535e+06	5.33182e+06	4.26707e+06	1.85191e+06	1.9862e+06	1.63605e+06	2.30534e+06	989897	1.42112e+06
M275T402	10-deoxygerfelin	275.278	401.7	274.269	6.9893	C15H14O5	[M+H]+	Organooxygen compounds	Ethers					GNPS	1	pos	1.35423e+07	3.73026e+06	3.38961e+07	2.19028e+07	2.69931e+07	2.59738e+07	3.11907e+07	2.85593e+07	2.71875e+06	2.39175e+07	2.11024e+07	2.1284e+07	4.07452e+07	4.16273e+07	5.19041e+07	4.8513e+07	3.21585e+06	8.50068e+07	1.69311e+06	3.60848e+06	1.71658e+07	2.07649e+07	2.29701e+07	4.66788e+07
M281T280	aspidofractinine	281.197	280.3	280.407	16.8024	C19H24N2	[M+H]+	Organonitrogen compounds	Amines					GNPS	1	pos	300582	256633	309132	396202	169021	190417	172237	131824	198432	238721	190145	259379	354778	349861	401425	343424	24425.2	111575	126023	17924.6	426282	295602	350079	567452
M284T124	MLS002154132-01!Oxprenolol hydrochloride6452-73-9	284.136	124.1	301.144	3.2988	C15H24ClNO3	[M+H-H2O]+							GNPS	1	pos	1.13878e+06	149706	1.04193e+06	266947	1.16442e+06	345676	999107	1.01371e+06	1.22341e+06	886881	362193	931389	263556	853386	951143	906999	1.21753e+06	544127	1.00811e+06	875915	772128	896064	553043	836137
M286T271	CGS 15943	285.695	271.3	285.689	21.7014	C13H8ClN5O	[M]+	Diazanaphthalenes	Benzodiazines					GNPS	1	pos	2.15681e+06	1.92353e+06	2.65166e+06	2.09026e+06	1.85416e+06	1.45788e+06	1.06686e+06	2.00829e+06	1.68888e+06	1.48397e+06	503690	1.46175e+06	2.12154e+06	1.40251e+06	1.68174e+06	2.08762e+06	1.59897e+06	1.80314e+06	1.77127e+06	2.01486e+06	1.884e+06	2.50321e+06	617130	994140
M288T503	Entacapone	288.095	503.5	305.101	3.5891	C14H15N3O5	[M+H-H2O]+	Cinnamic acids and derivatives	Hydroxycinnamic acids and derivatives	C07943		130929-57-6	HMDB0012226	GNPS	1	pos	81801.4	44112.8	63741.9	72987.6	101878	94098.7	103471	54542.8	91365	62033.2	107114	65323.6	89717.4	98702.7	108880	61066.2	102602	63348.1	75562.5	69986.2	73860.1	68563.4	52952.3	89757.6
M288T421	C17-Sphinganine	288.29	421.4	287.282	0.328059	C17H37NO2	[M+H]+							GNPS	1	pos	5.33998e+06	5.53134e+06	5.67542e+06	5.50521e+06	4.61118e+06	1.02017e+07	5.71288e+06	5.18882e+06	4.94283e+06	6.17619e+06	5.43643e+06	5.11821e+06	4.8003e+06	4.28798e+06	5.58905e+06	4.02377e+06	5.34746e+06	9.831e+06	4.46093e+06	5.9005e+06	5.26778e+06	5.53239e+06	3.09354e+06	5.12941e+06
M293T352	NCGC00385877-01_C12H20O8_(3R)-4,4-Dimethyl-2-oxotetrahydro-3-furanyl beta-D-glucopyranoside	293.125	351.5	292.116	7.8683	C12H20O8	[M+H]+							GNPS	1	pos	77281.5	94067	175912	38269.3	126892	163677	37027.2	87114.1	161696	95082.6	129548	122122	74184.6	70896.7	35612.3	33036.1	111299	242332	39551.2	40714.4	44470.4	39131.9	34576.1	60468.1
M294T260	stephanthrine	294.363	260.1	293.36	15.2057	C19H19NO2	[M+H]+					22108-99-2/		GNPS	1	pos	863523	825008	969050	1.78306e+06	1.38462e+06	6.2134e+06	4.75327e+06	1.26695e+06	3.11548e+06	1.39089e+06	1.79708e+06	1.29847e+06	1.58804e+06	1.29701e+06	1.10429e+06	1.48966e+06	1.26104e+06	1.19133e+06	1.43937e+06	1.3252e+06	1.18995e+06	1.1312e+06	1.03369e+06	1.53135e+06
M298T88	Spongosine	298.115	87.5	297.107	0.0181809	C11H15N5O5	[M+H]+					24723-77-1		GNPS	1	pos	447314	455316	1.1594e+06	1.12065e+06	432414	738825	341670	1.12355e+06	862850	734567	875782	858727	489783	304078	1.00054e+06	708837	1.04892e+06	489151	709563	839510	331141	1.06575e+06	727876	644316
M299T309	Geissoschizoline	299.211	308.5	298.204	1.92506	C19H26N2O	[M+H]+			C09197		18397-07-4		GNPS	1	pos	373908	328794	1.10312e+06	1.65688e+06	1.50174e+06	375612	1.69672e+06	1.28184e+06	1.29705e+06	1.07906e+06	1.23687e+06	1.02718e+06	1.556e+06	2.35854e+06	3.16e+06	1.17302e+06	1.2098e+06	1.73681e+06	2.12459e+06	2.45934e+06	2.47915e+06	4.62803e+06	1.10812e+06	603774
M299T438	NCGC00347859-02!2,3-dihydroxypropyl 13-methyltetradecanoate	299.253	438.5	316.261	4.09564	C18H36O4	[M+H-H2O]+							GNPS	1	pos	2.64025e+06	2.06768e+06	3.80395e+06	3.81008e+06	3.08546e+06	2.26633e+06	3.0618e+06	2.79332e+06	3.9391e+06	4.40813e+06	3.11597e+06	4.18355e+06	2.92306e+06	1.76214e+06	6.19341e+06	3.10306e+06	2.78366e+06	4.82952e+06	4.31755e+06	5.24234e+06	5.04986e+06	5.86118e+06	922193	1.27546e+06
M304T464	(R)-Heraclenol	304.3	463.9	304.295	15.4453	C16H16O6	[M]+	Organooxygen compounds	Ethers			26091-76-9	HMDB0030745	GNPS	1	pos	2.7373e+06	1.94423e+06	588029	2.07673e+06	4.04538e+06	2.72282e+06	3.04563e+06	2.7744e+06	3.32845e+06	3.74513e+06	4.2282e+06	3.13314e+06	3.5803e+06	3.33451e+06	3.56314e+06	2.25084e+06	2.29307e+06	2.56185e+06	1.91959e+06	2.09953e+06	2.38326e+06	74586.9	94692.8	117319
M306T305	MLS000028619-01!BUTACAINE149-16-6	306.235	304.8	306.231	14.929	C18H30N2O2	[M]+							GNPS	1	pos	833313	1.17235e+06	1.19382e+06	1.14674e+06	666112	948511	680898	807511	708421	999770	2.59815e+06	782807	553469	976241	888017	681346	740203	1.45217e+06	840457	865848	760346	895191	808399	750687
M311T499	iodinated analogue of makaluvamine Q	310.981	499.2	327.994	19.9446	[C11H11IN3O]+	[M+H-H2O]+							GNPS	1	pos	3.9985e+06	3.10266e+06	3.95718e+06	955465	3.47765e+06	2.87371e+06	438068	4.60818e+06	2.61203e+06	3.87352e+06	1.92377e+06	2.39383e+06	4.1085e+06	2.43314e+06	2.83269e+06	4.18044e+06	949741	3.76129e+06	3.85602e+06	3.75135e+06	3.09559e+06	3.58112e+06	201890	372369
M312T452	Trilostane	312.189	451.6	329.199	8.86002	C20H27NO3	[M+H-H2O]+	Steroids and steroid derivatives	Estrane steroids	C12580		13647-35-3	HMDB0015240	GNPS	1	pos	274498	335095	305884	283542	291699	329394	310904	311428	253175	285192	558939	334519	313482	337096	333889	306404	314460	348357	358012	276621	344255	335520	275834	331201
M317T452	CGS 12066B	317.324	452.4	334.339	22.8977	C17H17F3N4	[M+H-H2O]+	Organonitrogen compounds	Amines					GNPS	1	pos	3.22435e+06	2.78995e+06	2.27873e+06	2.98211e+06	195074	174760	1.70312e+06	990487	302768	2.30749e+06	446613	314401	718098	417233	742452	406346	1.20138e+07	1.15337e+07	1.11908e+07	1.15064e+07	5.30646e+06	4.3314e+06	1.78473e+06	3.98201e+06
M319T274_3	epalrestat	319.404	274.3	319.399	16.2803	C15H13NO3S2	[M]+	Carboxylic acids and derivatives	Amino acids, peptides, and analogues			82159-09-9/		GNPS	1	pos	310627	361680	606821	366417	570586	213291	54811.8	182619	266291	224414	398081	392941	272483	280563	564989	731685	354710	349967	202780	310051	209080	541715	17596.4	40860.3
M321T521	MLS000863608-01!5-(1,2,4a,5-tetramethyl-7-oxo-3,4,8,8a-tetrahydro-2H-naphthalen-1-yl)-3-methylpentanoic acid	321.242	520.9	320.235	1.31018	C20H32O3	[M+H]+							GNPS	1	pos	148612	199707	160398	143029	150393	120138	147196	145404	1.6051e+06	1.15371e+06	461122	2.93312e+06	1.45558e+07	2.9044e+07	1.16295e+06	3.09814e+06	154215	178167	150723	152696	121088	110755	110770	141006
M323T236	Cinanserin	323.472	235.7	340.484	13.1881	C20H24N2OS	[M+H-H2O]+	Carboxylic acids and derivatives	Carboxylic acid derivatives					GNPS	1	pos	11630.1	2.05761e+07	34006.8	23838.1	29618.3	25784	2240.17	71216.8	515560	318007	432700	63492.8	1389.39	1580.22	13886.2	1210.86	33681.9	73093.7	21174.4	87440.4	562.297	1522.4	418.256	603.311
M324T236_2	LEVOSULPIRIDE	324.421	236.5	341.426	6.88612	C15H23N3O4S	[M+H-H2O]+	Organooxygen compounds	Ethers			23672-07-3/		GNPS	1	pos	4.55986e+06	3.78139e+06	4.20047e+06	4.07235e+06	848309	1.06501e+06	767389	5.50279e+06	3.96797e+06	5.79607e+06	2.99465e+06	3.83599e+06	140003	453724	253559	346295	8.75257e+06	7.30116e+06	9.60362e+06	9.45959e+06	4.79749e+06	4.65171e+06	336065	9.94725e+06
M326T526	Sertraline HCl	325.684	526.2	342.691	1.63963	C17H18Cl3N	[M+H-H2O]+	Organonitrogen compounds	Amines			79559-97-0/		GNPS	1	pos	1.78985e+06	2.86232e+06	2.95968e+06	2.77991e+06	3.01973e+06	1.90712e+06	142750	2.1197e+06	2.54833e+06	1.74901e+06	1.58554e+06	1.1431e+06	2.05779e+06	1.87709e+06	1.46061e+06	1.8776e+06	1.79062e+06	1.55748e+06	2.0222e+06	2.29427e+06	2.10885e+06	2.20851e+06	72047.5	169717
M328T453	MLS001148648-01!2,2-DICHLORO-N-[4-HYDROXYPHENYL]-N-METHYLACETAMIDE 2-FUROIC ACID ESTER	328.013	452.8	327.007	3.32058	C14H11Cl2NO4	[M+H]+							GNPS	1	pos	745792	748291	917672	795935	846501	839848	764405	822864	464937	936426	1.06527e+06	823946	871133	895162	877862	880671	256157	943142	819056	960977	823241	309033	752442	739373
M328T514	tranilast	328.348	514.2	327.331	29.6149	C18H17NO5	[M+H]+	Organooxygen compounds	Ethers			53902-12-8/		GNPS	1	pos	1.12142e+06	1.35536e+06	1.53149e+06	1.28886e+06	604992	1.34287e+06	428347	1.46319e+06	1.07415e+06	1.59446e+06	1.3298e+06	165426	1.40231e+06	1.47864e+06	983597	796011	526163	1.54924e+06	1.16461e+06	1.58451e+06	1.19598e+06	1.21864e+06	2.25843e+06	1.56061e+06
M332T316	[10]-Shogaol	332.243	316	332.235	25.1475	C21H32O3	[M]+	Benzene and substituted derivatives	Phenols and derivatives			36752-54-2	HMDB0031462	GNPS	1	pos	534053	111293	539647	549640	344762	690769	115656	272992	135770	295312	236326	302526	800408	251831	286120	83164.1	215768	293729	276468	256704	274985	243169	259357	371537
M334T270_2	Palonosetron HCl	333.875	270.3	332.868	2.32423	C19H25ClN2O	[M+H]+	Carboxylic acids and derivatives	Carboxylic acid derivatives			135729-62-3/		GNPS	1	pos	133664	125368	130114	107879	113643	90996.6	122734	67429.8	64970.2	138509	165665	111778	127286	117204	121929	61942.8	199091	142759	146345	200909	169078	173727	88640.6	132668
M337T632_1	Cryptochlorogenic acid	337.294	631.7	354.309	22.4315	C16H18O9	[M+H-H2O]+	Carboxylic acids and derivatives	Carboxylic acid derivatives			905-99-7	HMDB0030653	GNPS	1	pos	4.88681e+07	5.50847e+07	5.79108e+07	5.14928e+07	9.00295e+07	5.87117e+07	4.01716e+07	2.68505e+07	2.57284e+07	2.87654e+07	5.07958e+07	5.01514e+07	5.52452e+07	4.57514e+07	5.41337e+07	8.09694e+07	4.35372e+07	5.45716e+07	5.01591e+07	3.49163e+07	5.32306e+07	8.44731e+07	3.11003e+07	3.27745e+07
M342T291	NCGC00169660-02_C22H30O3_2-Hydroxy-6-[(8Z,11Z)-8,11,14-pentadecatrien-1-yl]benzoic acid	342.227	291.3	342.219	21.346	C22H30O3	[M]+							MoNA	1	pos	317552	738939	918339	1.07806e+06	736925	322057	830447	2.15075e+06	1.09842e+06	894641	1.17031e+06	1.26634e+06	756065	832184	869665	892347	835338	670509	763598	680689	1.03252e+06	1.86253e+06	663475	833255
M347T248_2	icajine	347.426	248.2	364.438	11.991	C22H24N2O3	[M+H-H2O]+					5525-31-5/		GNPS	1	pos	104713	46636.3	1.75532e+06	117652	43627.5	819947	175983	54491.8	68113.9	62228.4	111054	67936	77837.4	32313.1	63431.8	40309.4	1.03051e+06	3.52431e+06	1.74765e+06	1.01516e+06	457274	443822	1.66681e+06	891024
M352T665	Lansoprazole	352.357	665	369.363	5.51713	C16H14F3N3O2S	[M+H-H2O]+	Organooxygen compounds	Ethers			103577-45-3	HMDB0005008	GNPS	1	pos	8.66346e+06	1.01418e+07	1.15102e+07	7.40082e+06	2.60481e+06	8.07247e+06	7.36168e+06	6.29525e+06	8.59847e+06	8.30001e+06	7.3254e+06	7.90012e+06	9.94988e+06	8.67056e+06	9.90529e+06	6.43058e+06	1.51718e+06	8.592e+06	7.15269e+06	7.27621e+06	8.5098e+06	1.46696e+07	4.9729e+06	5.46918e+06
M353T260_2	MLS002154197-01!Zimelidine dihydrochloride monohydrate61129-30-4	353.033	260.1	370.045	12.8006	C16H20BrClN2O	[M+H-H2O]+							GNPS	1	pos	858898	1.29361e+06	269811	1.08519e+06	1.17342e+06	927453	1.04095e+06	482248	934964	1.03165e+06	1.45833e+06	603917	1.20823e+06	807898	1.466e+06	137754	1.16852e+06	1.04863e+06	980280	671915	878104	1.24406e+06	592373	1.69118e+06
M355T494_1	lornoxicam	354.801	494	371.819	28.3708	C13H10ClN3O4S2	[M+H-H2O]+	Carboxylic acids and derivatives	Carboxylic acid derivatives			70374-39-9/		GNPS	1	pos	3.83033e+06	1.30586e+07	1.90249e+06	6.39599e+06	2.24353e+07	8.13389e+06	1.20932e+07	6.84315e+06	1.49968e+07	2.13665e+06	1.45267e+07	4.02986e+06	5.63966e+06	4.09798e+06	5.13143e+06	4.516e+06	1.03142e+07	1.00325e+07	1.25245e+07	1.77594e+07	3.58653e+06	6.17091e+06	5.08974e+06	1.07068e+07
M355T249	amorolfine hydrochloride	354.98	248.6	353.97	7.95538	C21H36ClNO	[M+H]+	Organooxygen compounds	Ethers			78613-38-4/		GNPS	1	pos	183626	20030.7	124007	174060	61395.2	172756	71682.1	91928.2	198318	139638	236116	29359.6	161858	124919	255513	148148	185124	26886.7	128451	112002	125762	127328	7604.38	145332
M373T343	averantin	373.128	342.9	372.369	0.324339	C20H20O7	[M+H]+	Organooxygen compounds	Alcohols and polyols			5803-62-3/		GNPS	1	pos	19629.6	14969.2	22414.6	194765	179690	199225	64430.1	30181.9	47947.8	88636.6	23747.9	135260	45662.5	22897.8	88718.1	49075.8	27487.4	14654.4	17918.5	18556.1	20915.9	73016.5	17535.1	20433
M355T517	Gancaonin I	355.412	517.5	354.396	23.9834	C21H22O5	[M+H]+	Organooxygen compounds	Ethers			126716-36-7	HMDB0038756	GNPS	1	pos	65351.8	39135.7	94577.9	84773.2	80898.3	125945	3044	43051.5	78345.2	68048.7	63125.2	69901	77680.2	75903.7	134464	98935.5	83888.4	87809.9	72878.5	292259	204130	111699	21573.2	2060.29
M358T507_2	Myrocin A	358.379	506.8	358.385	17.0211	C20H22O6	[M]+	Organooxygen compounds	Alcohols and polyols					GNPS	1	pos	2.33928e+07	2.62172e+07	2.46415e+07	2.34519e+07	8.24919e+07	1.98181e+07	2.71185e+07	2.94922e+07	3.80753e+07	2.94316e+07	7.17262e+06	3.14778e+07	2.06267e+07	2.64193e+07	1.00155e+08	1.59967e+07	1.49674e+06	3.90631e+06	1.09868e+07	1.64666e+06	2.35206e+07	3.44427e+07	3.44404e+07	2.77412e+07
M359T386	NCGC00180855-02_C23H36O4_2-Pentenoic acid, 3-[(acetyloxy)methyl]-5-[(1R,4aR,8aR)-decahydro-5,5,8a-trimethyl-2-methylene-1-naphthalenyl]-, methyl ester, (2Z)-	359.254	386	376.261	0.0713479	C23H36O4	[M+H-H2O]+							GNPS	1	pos	3546.74	22325.2	19038.9	20013.1	22842.6	24428.9	17444.6	26280.8	28478.5	16030.7	25571.8	21639.1	23675.8	27172.6	16454.8	19978.8	31085.8	15794.2	21540	24244.1	23858.8	17198.9	12095.7	20057.9
M361T521	LSM-4337	361.366	520.9	360.359	0.343142	C19H20O7	[M+H]+	Organooxygen compounds	Alcohols and polyols					GNPS	1	pos	405968	291014	439937	255510	547152	696269	509640	567372	232693	257899	296201	262630	345519	361651	334016	330222	368753	341784	450766	435082	644812	644140	592326	730713
M360T507	nadifloxacin	360.375	506.8	360.38	13.375	C19H21FN2O4	[M]+	Organooxygen compounds	Alcohols and polyols			124858-35-1/		GNPS	1	pos	3.597e+06	2.69325e+06	3.38685e+06	2.24078e+06	4.30588e+06	4.47654e+06	3.9846e+06	5.37995e+06	2.18784e+06	2.41334e+06	2.42811e+06	1.87853e+06	3.17422e+06	376699	3.02315e+06	2.91571e+06	3.21629e+06	3.44614e+06	2.81898e+06	3.53503e+06	4.81193e+06	5.14568e+06	5.8149e+06	5.28776e+06
M361T40	Naltrexone HCl	360.849	40.2	377.863	17.3646	C20H24ClNO4	[M+H-H2O]+					16676-29-2/		GNPS	1	pos	128812	127053	111869	169741	142309	29030.2	21105.7	182997	105226	216976	140905	163330	223912	214715	193557	262695	174044	135840	206276	122550	122484	112396	18532.5	148532
M363T54_2	NCGC00347620-02_C22H34O4_7-Oxabicyclo[4.1.0]hept-3-ene-2,5-diol, 4-(hydroxymethyl)-1-[(1,4,4a,5,6,7,8,8a-octahydro-2,5,5,8a-tetramethyl-1-naphthalenyl)methyl]-	363.261	53.8	362.246	20.9613	C22H34O4	[M+H]+							GNPS	1	pos	478223	943464	422166	665161	782883	738522	534347	872773	626464	550706	670811	616212	654023	626322	584778	621820	631346	536109	768923	651896	739936	667987	378915	381171
M367T607	Geissolaevine	367.376	606.8	366.368	2.78733	C20H18N2O5	[M+H]+							GNPS	1	pos	7.02501e+07	5.82836e+07	2.31375e+07	1.19605e+07	1.32152e+07	3.44102e+07	2.4198e+07	1.34772e+07	3.2735e+07	1.98922e+07	6.62332e+07	2.80918e+07	5.91585e+07	1.35547e+07	9.44785e+06	1.98239e+07	2.77117e+07	6.71866e+07	1.37548e+07	1.0549e+07	1.26809e+07	3.02189e+07	6.436e+07	5.04914e+07
M368T359	Blonanserin	368.244	358.8	367.504	14.2628	C23H30FN3	[M+H]+					132810-10-7/		GNPS	1	pos	27497.1	106239	142750	58181.5	179212	35418	558464	51962.6	186984	27476.8	316748	62213.3	55886.2	52048.4	136745	70331.1	108464	362382	315085	78320.3	273842	85580.8	129524	6521.43
M368T482	Nilvadipine	368.372	481.8	385.371	22.3524	C19H19N3O6	[M+H-H2O]+					75530-68-6/		GNPS	1	pos	256715	226144	244803	256729	469789	427645	282170	582835	398579	227582	237004	225114	229795	172216	123205	210981	245248	257244	380811	296631	343216	241377	243065	269766
M370T40	Dibromophakellin - CASMI2016 Category 1 - Challenge 1	369.924	40.2	386.933	5.40699	C11H11Br2N5O	[M+H-H2O]+							GNPS	1	pos	286451	202819	224176	269072	342886	367710	296145	157698	304070	243297	416420	217317	118772	247054	358671	212816	341914	156051	245268	219020	198629	217446	99999.7	218681
[truncated: 3,735 more rows]

## Sheet: Notes
标题	注释		Notes
ID	代谢物一级名称		Primary metabolite name
name	鉴定结果		Identification result
mz	质荷比		Mass-to-charge ratio (m/z)
rt	保留时间（单位秒）		Retention time (unit: seconds)
exact_mass	精确分子质量		Exact molecular mass
[truncated: 14 more rows]
