# Supplementary material for: Comparative analysis of rhizosphere soil between three plantation types in Karst Rocky Desertification area by widely targeted metabolomics
Source: PeerJ. 2025 Mar 31;13:e19131. doi: 10.7717/peerj.19131 (PMC11967436; doi:10.7717/peerj.19131)
Supplement: Supplemental Information 14 [file peerj-13-19131-s014.xlsx]

## Sheet: Sheet1
ID	name	mz	rt	exact_mass	ppm	formula	precursor_type	class	sub_class	KEGG	KEGG_Pathway	CAS	hmdb	library	level	posneg	XC_1	XC_2	XC_3	XC_4	XC_5	XC_6	XC_7	XC_8	YT_9	YT_10	YT_11	YT_12	YT_13	YT_14	YT_15	YT_16	GP_17	GP_18	GP_19	GP_20	GP_21	GP_22	GP_23	GP_24
M156T190	N-Methylethanolaminium phosphate	156.039	190	155.035	17.7901	C3H10NO4P	[M+H]+	Organic oxides	Amines	C01210	Lipid metabolism		HMDB0060173	MetaDNA	2	pos	1.57383e+06	1.88189e+06	2.02987e+06	1.66854e+06	696506	665256	669560	669209	1.48786e+06	1.35167e+06	587819	1.01311e+06	1.6631e+06	1.18586e+06	1.31055e+06	659978	1.81199e+06	1.61715e+06	1.48038e+06	1.46287e+06	1.34537e+06	558444	1.20411e+06	1.81785e+06
M182T312	2-Methyl-3-hydroxy-5-formylpyridine-4-carboxylate	182.045	312.1	181.037	0.131836	C8H7NO4	[M+H]+	Pyridines and derivatives	Pyridinecarboxylic acids and derivatives	C06050	Metabolism of cofactors and vitamins; Global and overview maps		HMDB0006954	MetaDNA	2	pos	724201	640657	642441	674236	614619	683094	625895	639476	644232	669008	959459	698415	698788	675821	734330	626269	683500	657698	675652	636228	747234	699654	678154	688662
M227T471	Deoxycytidine	227.092	471.2	227.091	5.72459	C9H13N3O4	[M]+	Azacyclic compounds	Alcohols and polyols	C00881	Membrane transport; Global and overview maps; Nucleotide metabolism	951-77-9	HMDB0000014	MetaDNA	2	pos	145940	112943	279840	205572	1.93546e+06	153784	956910	2.27784e+06	77233.5	57025.7	113428	2.02595e+06	2.31359e+06	283860	155194	2.82096e+06	455898	314740	130173	453269	59420.7	137746	111994	295533
M389T248	3alpha,7alpha-Dihydroxy-12-oxo-5beta-cholanate	389.257	248.3	406.272	19.9504	C24H38O5	[M+H-H2O]+	Carboxylic acids and derivatives	Alcohols and polyols	C01292		2458-08-4		MetaDNA	2	pos	1.31054e+06	1.19754e+06	1.4299e+06	1.43242e+06	1.64452e+06	1.54186e+06	1.60774e+06	1.107e+06	1.71825e+06	1.62599e+06	1.59755e+06	1.33358e+06	1.54467e+06	1.48494e+06	1.54361e+06	1.18977e+06	1.85591e+06	1.18552e+06	1.51686e+06	1.30719e+06	1.01779e+06	1.10213e+06	921931	1.29709e+06
M184T51	Choline sulfate	184.065	50.8	183.056	3.93342	C5H13NO4S	[M+H]+	Organic oxides	Alkyl sulfates	C00919	Membrane transport	4858-96-2		MetaDNA	2	pos	1.0972e+06	4.4049e+06	7.19434e+06	9.82892e+06	4.93562e+06	3.42075e+06	4.30773e+06	3.70747e+06	2.04317e+06	3.51298e+06	3.99732e+06	4.42763e+06	2.42106e+06	5.70058e+06	8.12431e+06	5.26879e+06	3.13965e+06	4.8633e+06	4.22172e+06	5.11218e+06	1.89819e+07	7.79071e+06	2.05254e+06	3.64304e+06
M440T620	Oleanolic aldehyde	440.36	620.3	440.365	11.8084	C30H48O2	[M]+			C20946				MetaDNA	2	pos	3.98338e+07	3.68976e+07	3.4061e+07	5.65114e+07	9.16812e+06	2.36651e+07	1.19059e+07	1.81624e+07	2.42243e+07	4.04911e+07	2.34947e+07	3.00682e+07	1.43621e+07	5.74821e+06	1.78991e+07	1.89926e+07	8.91831e+07	1.34599e+08	8.51946e+07	1.30816e+08	3.91768e+07	3.86883e+07	3.24929e+07	4.1858e+07
M183T269	L-Iditol	183.092	268.6	182.079	29.6254	C6H14O6	[M+H]+	Organooxygen compounds	Alcohols and polyols	C01507		488-45-9	HMDB0011632	MetaDNA	2	pos	1.02585e+06	1.07029e+06	1.09086e+06	1.07853e+06	1.00223e+06	1.08134e+06	1.04145e+06	966492	1.00983e+06	1.0351e+06	1.05009e+06	1.04827e+06	1.02998e+06	1.09006e+06	1.06312e+06	1.10277e+06	1.03576e+06	1.06517e+06	1.08665e+06	1.07707e+06	1.09349e+06	1.07844e+06	1.07676e+06	1.1302e+06
M600T607_2	Neoxanthin	600.428	607	600.418	16.322	C40H56O4	[M]+	Epoxides	Alcohols and polyols	C08606	Global and overview maps; Metabolism of terpenoids and polyketides	14660-91-4/30743-41-0	HMDB0003020	MetaDNA	2	pos	7.40307e+06	9.01606e+08	1.49888e+07	1.05325e+06	2.03087e+06	2.20383e+07	3.04302e+07	322947	99609.4	2.18586e+07	1.2644e+06	3.1007e+07	1.30777e+06	125493	1.92456e+07	2.09773e+07	6.03912e+06	208107	262524	2.99269e+07	108981	3.04414e+07	2.05671e+07	1.6753e+06
M449T512	Deoxycholic acid glycine conjugate	449.324	512	449.314	22.2561	C26H43NO5	[M]+	Carboxylic acids and derivatives	Alcohols and polyols	C05464		360-65-6	HMDB0000631	MetaDNA	2	pos	307385	349859	390247	320192	105766	406744	504596	303641	343452	479131	345524	304809	335255	372819	91771	308848	317866	532935	256669	360344	604619	305096	352177	375865
M468T527	Lupeol acetate	468.386	527.4	468.397	21.9899	C32H52O2	[M]+	Carboxylic acids and derivatives	Carbonyl compounds	C08630		1617-68-1		MetaDNA	2	pos	4.20486e+06	3.232e+06	2.73116e+06	2.97489e+06	2.06691e+06	2.18923e+06	2.49734e+06	2.38074e+06	308631	788329	236944	894775	1.16207e+06	1.41643e+06	1.15672e+06	194270	2.84717e+06	2.22326e+06	1.89344e+06	2.80482e+06	3.12304e+06	2.71012e+06	2.17158e+06	2.73824e+06
M584T663	Capsanthin	584.42	662.6	584.423	4.44883	C40H56O3	[M]+	Organic oxides	Acryloyl compounds	C08584	Metabolism of terpenoids and polyketides	465-42-9	HMDB0036590	MetaDNA	2	pos	1.29303e+06	83382.4	678937	15928	1.26083e+06	126465	2.59402e+06	144829	528024	1.60647e+06	118739	59601.3	37813.5	41530.2	45387.9	100628	1.64083e+06	39312.1	33944.5	531601	11830.1	271924	814923	1.56488e+06
M299T565	Ricinoleic acid	299.258	565.4	298.251	0.0801983	C18H34O3	[M+H]+	Carboxylic acids and derivatives	Alcohols and polyols	C08365		141-22-0	HMDB0034297	MetaDNA	2	pos	88821.1	210832	127342	580013	884225	329521	121973	4.05888e+06	2.12558e+07	3.16806e+07	2.60613e+07	3.52287e+07	3.35307e+07	3.73427e+07	3.28794e+07	2.78137e+07	1.12001e+07	2.26703e+07	92536.1	98970.1	65606	227242	5.8974e+06	1.22651e+07
M103T40	2-Ketobutyric acid	102.971	40.3	102.032	0.332173	C4H6O3	[M+H]+	Keto acids and derivatives	Short-chain keto acids and derivatives	C00109	Carbohydrate metabolism; Amino acid metabolism; Global and overview maps	600-18-0	HMDB0000005	BioDeepDB	2	pos	1.85969e+06	2.09257e+06	3.34524e+06	1.97743e+06	1.89875e+06	2.21436e+06	1.796e+06	3.84118e+06	746611	1.63667e+06	2.16613e+06	629778	2.15238e+06	1.91e+06	1.87134e+06	1.78029e+06	1.82617e+06	1.92377e+06	2.18788e+06	2.19217e+06	1.6239e+06	3.51938e+06	1.60855e+06	1.79698e+06
M102T372	Isovaleric acid	102.035	372.3	102.068	2.39954	C5H10O2	[M]+	Fatty Acyls	Fatty acids and conjugates	C08262	Chemical structure transformation maps; Global and overview maps; Digestive system	503-74-2	HMDB0000718	BioDeepDB	2	pos	4.60681e+07	4.17755e+07	4.634e+07	6.20641e+07	2.17261e+07	1.88201e+07	1.97363e+07	1.54422e+07	1.88624e+07	2.39501e+07	2.38791e+07	2.11918e+07	6.17029e+06	6.30619e+06	4.4002e+06	2.20877e+07	4.33323e+07	3.83827e+07	3.47432e+07	3.43409e+07	2.3027e+07	2.99738e+07	2.8238e+07	2.35945e+07
M103T493	Phenylacetaldehyde	103.051	493.1	120.058	8.09309	C8H8O	[M+H-H2O]+	Benzene and substituted derivatives	Phenylacetaldehydes	C00601	Amino acid metabolism; Xenobiotics biodegradation and metabolism; Global and overview maps	122-78-1	HMDB0006236	BioDeepDB	2	pos	9.03405e+06	2.18302e+06	7.72355e+06	8.64579e+06	3.21032e+06	3.23767e+06	2.54278e+06	2.14239e+07	1.15583e+07	1.90498e+07	2.38163e+06	1.60323e+07	1.47209e+07	1.36725e+07	1.21737e+07	3.09013e+07	2.1114e+07	3.36294e+06	2.44949e+06	3.29091e+06	2.02556e+06	2.91345e+06	2.21651e+06	2.30691e+06
M104T636	Dimethylglycine	104.108	636	103.063	8.50157	C4H9NO2	[M+H]+	Carboxylic acids and derivatives	Amino acids, peptides, and analogues	C01026	Amino acid metabolism; Global and overview maps	1118-68-9	HMDB0000092	BioDeepDB	2	pos	2.08103e+08	2.17766e+08	2.1651e+08	7.87333e+07	2.19136e+08	3.75774e+08	2.62129e+07	2.74586e+08	2.07372e+08	1.75325e+08	2.04498e+08	1.31917e+08	6.29059e+07	6.31369e+07	2.69855e+08	5.32662e+07	2.1028e+08	2.76236e+08	1.97311e+08	3.69704e+08	1.83196e+08	5.77582e+07	2.66466e+08	7.0775e+07
M109T306	m-Cresol	109.102	306.2	108.058	2.18436	C7H8O	[M+H]+	Phenols	Cresols	C01467	Xenobiotics biodegradation and metabolism; Global and overview maps	108-39-4	HMDB0002048	BioDeepDB	2	pos	3.59243e+06	8.33613e+06	3.17582e+06	3.84139e+06	3.13999e+06	2.19626e+06	3.38941e+06	7.99477e+06	2.68702e+06	2.63438e+06	3.01172e+06	3.78694e+06	2.93999e+06	2.19518e+06	1.16831e+07	3.66211e+06	3.07113e+06	1.32441e+07	4.44364e+06	4.49601e+06	5.77906e+06	5.51932e+06	2.39114e+06	1.46052e+06
M110T372	Catechol	110.019	372.2	110.037	12.4815	C6H6O2	[M]+			C00090	Xenobiotics biodegradation and metabolism; Global and overview maps	120-80-9 / 12385-08-9		BioDeepDB	2	pos	6.13587e+07	2.66567e+07	1.26903e+08	8.11234e+07	5.11115e+07	3.99506e+07	2.62917e+07	9.70375e+07	5.07015e+07	5.18104e+07	3.60312e+07	5.31413e+07	1.20216e+07	1.15138e+07	2.82482e+07	2.83941e+07	3.86706e+07	5.39243e+07	1.20131e+07	4.60416e+07	1.76709e+07	8.96124e+07	1.3448e+07	3.18143e+07
M110T402	Hydroquinone	110.019	402.3	110.037	8.66074	C6H6O2	[M]+	Phenols	Benzenediols	C00530	Amino acid metabolism; Xenobiotics biodegradation and metabolism; Global and overview maps	123-31-9	HMDB0002434	BioDeepDB	2	pos	2.2916e+07	2.13308e+07	2.56487e+07	4.79825e+07	9.93088e+06	3.26542e+07	8.83652e+06	1.20489e+06	3.6839e+07	3.75215e+07	5.04518e+07	2.30217e+07	3.69494e+07	2.61485e+07	2.17886e+07	4.0875e+07	2.27095e+07	1.0051e+07	2.03988e+07	4.50867e+07	2.38045e+07	4.63413e+07	6.01666e+06	7.98463e+06
M111T600	Pyrrole-2-carboxylic acid	111.019	600.4	111.032	7.5733	C5H5NO2	[M]+	Pyrroles	Pyrrole carboxylic acids and derivatives	C05942	Amino acid metabolism	634-97-9	HMDB0004230	BioDeepDB	2	pos	5.02183e+08	4.01916e+08	5.10778e+08	6.31474e+08	2.16259e+08	1.91528e+08	2.28905e+08	1.64992e+08	1.91088e+08	2.28087e+08	2.66656e+08	2.30713e+08	5.56492e+07	4.91119e+07	1.08443e+09	2.06761e+08	4.71786e+08	3.90013e+08	3.37046e+08	3.94746e+08	2.3321e+08	2.92907e+08	2.75573e+08	2.69091e+08
M113T72	Creatinine	113.035	72.2	113.059	0.0881227	C4H7N3O	[M]+	Carboxylic acids and derivatives	Amino acids, peptides, and analogues	C00791	Amino acid metabolism; Global and overview maps	60-27-5	HMDB0000562	BioDeepDB	2	pos	5.65933e+06	5.7457e+06	5.59187e+06	5.2742e+06	4.87519e+06	5.78334e+06	6.1359e+06	3.6983e+06	5.99874e+06	6.48505e+06	7.01256e+06	6.28297e+06	7.46403e+06	6.45918e+06	1.11662e+07	878576	431359	1.00379e+07	6.02044e+06	6.80619e+06	6.61888e+06	6.35914e+06	6.98319e+06	6.87277e+06
M130T254	Ketoleucine	130.159	253.7	130.063	2.98218	C6H10O3	[M]+	Keto acids and derivatives	Short-chain keto acids and derivatives	C00233	Amino acid metabolism; Biosynthesis of other secondary metabolites; Global and overview maps	816-66-0	HMDB0000695	BioDeepDB	2	pos	3.86141e+06	2.62907e+06	3.49285e+06	2.06615e+06	2.66485e+06	1.85237e+07	2.86051e+06	954202	1.0115e+07	2.9303e+06	1.6933e+06	2.45975e+06	2.51294e+06	1.30164e+07	3.0921e+06	2.11146e+06	2.38823e+06	6.13182e+06	2.32259e+06	2.56496e+06	8.07282e+06	2.3191e+06	2.02362e+06	1.16339e+07
M116T50	L-Proline	116.071	49.6	115.063	0.0859734	C5H9NO2	[M+H]+	Carboxylic acids and derivatives	Amino acids, peptides, and analogues	C00148	Cancer: overview; Membrane transport; Digestive system; Biosynthesis of other secondary metabolites; Translation; Amino acid metabolism; Global and overview maps	147-85-3	HMDB0000162	BioDeepDB	2	pos	7.5087e+06	7.18025e+06	1.0964e+07	1.11635e+07	4.70246e+06	6.07149e+06	3.74486e+06	2.8585e+06	6.82856e+06	9.06184e+06	5.17368e+06	7.56382e+06	6.53641e+06	6.65201e+06	8.03114e+06	7.82462e+06	1.43231e+06	8.19692e+06	2.90537e+06	2.18404e+06	9.92161e+06	7.20818e+06	7.9201e+06	1.23811e+07
M119T464_2	Phenylacetic acid	119.086	463.9	136.052	4.03475	C8H8O2	[M+H-H2O]+	Benzene and substituted derivatives		C07086	Amino acid metabolism; Xenobiotics biodegradation and metabolism; Global and overview maps	103-82-2	HMDB0000209	BioDeepDB	2	pos	909990	1.66021e+06	6.66562e+06	1.45017e+06	603316	1.79518e+06	2.37089e+06	516719	646391	2.533e+06	4.11255e+06	3.82853e+06	1.86325e+06	1.01639e+06	1.93641e+06	1.45439e+06	4.41639e+06	5.43903e+06	5.81562e+06	6.06804e+06	2.59828e+06	3.41193e+06	3.22084e+06	3.30453e+06
M120T61	L-Allothreonine	120.024	61.5	119.058	1.12689	C4H9NO3	[M+H]+	Carboxylic acids and derivatives	Amino acids, peptides, and analogues	C05519	Amino acid metabolism; Global and overview maps	24830-94-2 / 28954-12-3 / 144-98-9	HMDB0004041	BioDeepDB	2	pos	6.89852e+06	5.66311e+06	6.15513e+06	7.15511e+06	4.46168e+06	4.01383e+06	4.42493e+06	4.313e+06	4.00233e+06	4.18802e+06	4.32074e+06	4.98048e+06	3.74696e+06	3.08342e+06	3.41482e+06	3.1588e+06	1.30944e+07	1.13928e+07	1.04573e+07	9.45783e+06	4.81604e+06	4.92523e+06	5.56935e+06	5.17715e+06
M124T520	Nicotinic acid	124.086	519.8	123.032	4.51828	C6H5NO2	[M+H]+	Pyridines and derivatives	Pyridinecarboxylic acids and derivatives	C00253	Metabolism of cofactors and vitamins; Biosynthesis of other secondary metabolites; Infectious disease: bacterial; Chemical structure transformation maps; Global and overview maps	59-67-6	HMDB0001488	BioDeepDB	2	pos	3.64181e+07	3.37416e+08	5.39607e+07	2.17756e+08	5.94132e+08	3.81489e+08	7.42285e+07	4.432e+07	3.86198e+07	4.25401e+07	1.52825e+08	1.74418e+08	3.88597e+08	2.15657e+08	6.03017e+07	5.7916e+07	1.04718e+08	1.14223e+08	5.74904e+07	1.64224e+08	1.42019e+08	2.02864e+08	8.22407e+07	8.86159e+07
M140T44	Phosphonoacetate	140.069	44.5	139.988	1.11291	C2H5O5P	[M]+	Organic phosphonic acids and derivatives	Organic phosphonic acids	C05682	Metabolism of other amino acids; Global and overview maps	4408-78-0	HMDB0004110	BioDeepDB	2	pos	1.15073e+06	2.16207e+06	3.22735e+06	1.53103e+06	2.4245e+06	938029	629505	2.46198e+06	4.77194e+06	6.89987e+06	3.28969e+06	804939	767185	874173	2.48691e+06	3.11324e+06	2.84986e+06	3.17432e+06	754728	2.0991e+06	3.24243e+06	3.31908e+06	377673	674553
M126T57	Thymine	125.986	57.4	126.043	8.86787	C5H6N2O2	[M]+	Diazines	Pyrimidines and pyrimidine derivatives	C00178	Global and overview maps; Nucleotide metabolism	65-71-4	HMDB0000262	BioDeepDB	2	pos	1.67447e+07	1.69868e+07	1.67089e+07	1.6273e+07	1.64435e+07	2.94883e+07	1.75205e+07	2.32298e+07	1.02397e+07	1.79942e+07	1.84748e+07	1.15775e+07	2.00736e+07	3.31501e+07	2.03671e+07	2.6744e+07	1.15095e+07	1.80947e+07	1.80667e+07	1.63042e+07	2.8748e+07	1.94316e+07	1.25748e+07	1.94024e+07
M131T47	Heptanoic acid	130.965	46.7	130.099	3.96041	C7H14O2	[M+H]+	Fatty Acyls	Fatty acids and conjugates	C17714		111-14-8	HMDB0000666	BioDeepDB	2	pos	1.09156e+07	3.11917e+06	1.24341e+06	1.22289e+06	4.55678e+06	3.24343e+06	2.47492e+06	4.52552e+06	5.89624e+06	2.09233e+06	3.76669e+06	1.20828e+06	2.92246e+06	3.70864e+06	3.031e+06	1.1473e+06	325316	1.14645e+06	1.15789e+06	2.66353e+06	3.20969e+06	1.21027e+06	7.07698e+06	730932
M132T573	(R)-Pantolactone	131.534	572.6	130.063	0.413355	C6H10O3	[M+H]+			C01012		599-04-2		BioDeepDB	2	pos	4.84239e+07	1.43743e+08	1.3772e+08	9.64278e+07	1.30703e+08	1.37032e+08	7.66453e+07	6.56853e+07	8.32263e+07	8.74852e+07	7.49863e+07	1.23682e+08	7.33565e+07	6.90541e+07	8.06659e+07	8.74139e+07	3.30159e+07	5.13359e+07	6.49207e+07	8.21001e+07	6.41011e+07	1.08029e+08	1.09065e+08	7.26679e+07
M132T33	Glutaric acid	131.974	32.9	132.042	1.65086	C5H8O4	[M]+	Carboxylic acids and derivatives	Dicarboxylic acids and derivatives	C00489	Lipid metabolism; Amino acid metabolism; Global and overview maps	110-94-1	HMDB0000661	BioDeepDB	2	pos	6.90131e+06	7.48221e+06	8.5806e+06	1.71391e+07	1.21208e+07	2.54842e+06	3.82223e+06	7.38976e+06	7.83938e+06	9.13605e+06	9.74976e+06	9.10697e+06	1.24771e+07	1.00147e+07	1.02968e+07	1.76362e+07	9.35328e+06	1.05877e+07	7.10828e+06	1.65891e+07	1.25672e+07	7.32117e+06	5.29035e+06	2.41836e+07
M132T57	cis-4-Hydroxy-D-proline	131.975	56.7	131.058	1.13677	C5H9NO3	[M+H]+	Carboxylic acids and derivatives	Amino acids, peptides, and analogues	C03440	Amino acid metabolism; Global and overview maps	2584-71-6	HMDB0060460	BioDeepDB	2	pos	9.94483e+06	1.24653e+07	9.33718e+06	1.38768e+07	9.52823e+06	8.93384e+06	9.77884e+06	8.52494e+06	1.18259e+07	1.12987e+07	1.00496e+07	1.25367e+07	1.24702e+07	1.07287e+07	2.1943e+07	1.0073e+07	1.32794e+07	9.17856e+06	9.89026e+06	1.05542e+07	1.22798e+07	1.04606e+07	1.99647e+07	9.60085e+06
M133T47	L-Asparagine	133.061	47	132.054	2.2546	C4H8N2O3	[M+H]+	Carboxylic acids and derivatives	Amino acids, peptides, and analogues	C00152	Cancer: overview; Metabolism of other amino acids; Digestive system; Translation; Amino acid metabolism; Chemical structure transformation maps; Global and overview maps	70-47-3	HMDB0000168	BioDeepDB	2	pos	3.71259e+06	3.69106e+06	3.66306e+06	3.74523e+06	2.14512e+07	3.6389e+06	3.74631e+06	1.25057e+07	1.1918e+07	1.36209e+07	1.51718e+07	1.64568e+07	1.43356e+07	1.65007e+07	2.67474e+06	1.64553e+07	1.38382e+07	3.61175e+06	1.41436e+07	1.67087e+07	1.85664e+07	3.60718e+06	3.30063e+06	1.26868e+07
M132T686	L-Isoleucine	132.102	685.9	131.095	0.0301319	C6H13NO2	[M+H]+	Carboxylic acids and derivatives	Amino acids, peptides, and analogues	C00407	Cancer: overview; Metabolism of other amino acids; Digestive system; Biosynthesis of other secondary metabolites; Infectious disease: bacterial; Translation; Amino acid metabolism; Chemical structure transformation maps; Global and overview maps	73-32-5	HMDB0000172	BioDeepDB	2	pos	2.04711e+08	5.1665e+07	1.02378e+08	1.46346e+08	1.47841e+08	1.83857e+08	5.76757e+07	2.15194e+08	7.24045e+07	1.71319e+08	8.84944e+07	1.92908e+08	1.26675e+08	1.73821e+08	1.23223e+08	8.67336e+07	1.5592e+08	1.41194e+08	3.81645e+07	6.86389e+07	1.30433e+08	1.35035e+08	4.84353e+07	1.18516e+08
M142T42	O-Phosphoethanolamine	141.957	42.3	141.019	9.71559	C2H8NO4P	[M+H]+	Organic phosphoric acids and derivatives	Phosphate esters	C00346	Lipid metabolism; Signal transduction; Global and overview maps; Drug resistance: antimicrobial	1071-23-4	HMDB0000224	BioDeepDB	2	pos	2.43349e+07	2.22507e+06	1.39178e+07	2.50479e+07	1.46074e+07	1.39158e+07	1.32972e+07	1.25459e+07	1.25459e+07	4.39704e+07	1.62936e+07	1.90752e+07	9.97991e+07	1.31073e+07	3.08896e+07	1.3216e+07	1.27433e+07	1.24062e+07	1.21505e+07	1.21243e+07	1.19463e+07	1.19479e+07	1.52353e+07	1.1933e+07
M163T389	Anabasine	163.039	388.8	162.116	0.0407302	C10H14N2	[M+H]+			C06180	Chemical structure transformation maps; Biosynthesis of other secondary metabolites; Global and overview maps	13078-04-1 / 494-52-0	HMDB0004350	BioDeepDB	2	pos	5.8538e+06	6.58084e+06	5.93073e+06	6.04811e+06	4.34124e+06	4.31172e+06	5.06548e+06	6.64091e+06	4.69754e+06	8.61669e+06	5.36611e+06	6.2511e+06	9.68246e+06	9.43401e+06	4.10643e+06	6.00778e+06	7.89636e+06	6.93248e+06	3.99997e+06	3.50875e+06	1.0351e+07	7.33668e+06	5.69001e+06	9.00901e+06
M147T679	4-Hydroxycinnamic acid	146.981	678.8	164.047	6.72885	C9H8O3	[M+H-H2O]+	Cinnamic acids and derivatives	Hydroxycinnamic acids and derivatives	C00811	Metabolism of cofactors and vitamins; Biosynthesis of other secondary metabolites; Amino acid metabolism; Chemical structure transformation maps; Global and overview maps	7400-08-0 / 7400-08-0 501-98-4 / 501-98-4	HMDB0002035	BioDeepDB	2	pos	1.73227e+07	1.96676e+07	2.18963e+07	2.06269e+07	2.33503e+07	6.93698e+07	1.67262e+07	2.25712e+07	4.06218e+07	1.35258e+07	4.99263e+07	7.01611e+06	4.87217e+07	4.59099e+07	4.64152e+07	3.43395e+08	5.05637e+07	1.63366e+07	1.60935e+07	1.68919e+07	3.61658e+07	5.24075e+07	2.23422e+07	4.64261e+07
M130T72	L-Glutamic acid	130.05	72.3	147.053	23.2854	C5H9NO4	[M+H-H2O]+	Carboxylic acids and derivatives	Amino acids, peptides, and analogues	C00025	Neurodegenerative disease; Biosynthesis of other secondary metabolites; Substance dependence; Cellular community - eukaryotes; Energy metabolism; Metabolism of other amino acids; Excretory system; Carbohydrate metabolism; Cancer: overview; Membrane transport; Cell growth and death; Signal transduction; Nervous system; Digestive system; Environmental adaptation; Amino acid metabolism; Chemical str…	56-86-0	HMDB0000148	BioDeepDB	2	pos	3.28957e+06	2.66138e+06	2.88974e+06	2.7185e+06	2.55363e+06	3.06312e+06	2.6305e+06	2.7072e+06	3.67644e+06	2.51745e+06	3.55791e+06	3.22998e+06	2.72504e+06	2.82856e+06	2.35235e+06	2.71802e+06	2.84988e+06	2.91184e+06	3.19111e+06	3.03667e+06	2.96992e+06	2.71121e+06	2.70567e+06	2.28195e+06
M149T33	L-2-Hydroxyglutaric acid	148.976	32.8	148.037	6.95093	C5H8O5	[M+H]+	Fatty Acyls	Fatty acids and conjugates	C03196	Amino acid metabolism; Global and overview maps	13095-48-2	HMDB0000694	BioDeepDB	2	pos	9.88905e+06	1.09604e+07	1.06406e+07	5.16644e+06	1.28496e+07	1.8317e+07	9.43987e+06	1.44228e+07	7.21011e+06	1.25874e+07	1.16333e+07	1.17621e+07	9.96777e+06	1.45871e+07	8.51159e+06	1.28274e+07	5.77929e+06	5.60897e+06	9.0545e+06	8.98069e+06	1.17781e+07	9.63162e+06	7.90117e+06	9.60031e+06
M149T448	3-Methyladenine	149.024	448	149.07	4.11647	C6H7N5	[M]+	Imidazopyrimidines	Purines and purine derivatives	C00913		5142-23-4	HMDB0011600	BioDeepDB	2	pos	2.99896e+06	3.09599e+06	2.86229e+06	2.641e+06	3.22874e+06	3.05562e+06	5.88452e+06	3.60221e+06	3.15637e+06	3.07894e+06	3.46704e+06	3.09839e+06	2.96149e+06	3.11697e+06	2.5462e+06	3.23164e+06	2.97057e+06	2.91112e+06	5.66655e+06	2.41758e+06	3.1034e+06	3.00178e+06	2.97772e+06	2.73075e+06
M149T484	trans-Cinnamate	149.06	484.4	148.052	1.5055	C9H8O2	[M+H]+			C00423	Metabolism of cofactors and vitamins; Biosynthesis of other secondary metabolites; Amino acid metabolism; Chemical structure transformation maps; Global and overview maps	140-10-3		BioDeepDB	2	pos	2.58296e+06	678507	1.72425e+06	1.29261e+06	1.6919e+06	1.89127e+06	1.05997e+06	1.23192e+06	2.47604e+06	4.05774e+06	3.95182e+06	3.73528e+06	2.19452e+06	2.4357e+06	1.98777e+06	3.39549e+06	2.28488e+06	3.12202e+06	3.50259e+06	2.80145e+06	3.84752e+06	3.34303e+06	542153	491899
M151T40	D-Ribose	151.036	40.2	150.053	3.63242	C5H10O5	[M+H]+	Organooxygen compounds	Carbohydrates and carbohydrate conjugates	C00121	Carbohydrate metabolism; Membrane transport; Global and overview maps; Cell motility	613-83-2 / 50-69-1	HMDB0000283	BioDeepDB	2	pos	2.79806e+07	2.53167e+07	2.74783e+07	2.6442e+07	2.67946e+07	2.69798e+07	2.51464e+07	2.84821e+07	2.80128e+07	2.75172e+07	2.75889e+07	2.74099e+07	2.81514e+07	2.64969e+07	2.74566e+07	2.60641e+07	2.74216e+07	2.72684e+07	2.56301e+07	2.7909e+07	2.57989e+07	2.65629e+07	2.65758e+07	2.58918e+07
M153T559	Perillyl alcohol	153.091	559.5	152.12	2.85663	C10H16O	[M+H]+	Prenol lipids	Monoterpenoids	C02452	Global and overview maps; Metabolism of terpenoids and polyketides	536-59-4 / 18457-55-1	HMDB0003634	BioDeepDB	2	pos	872218	884941	968282	965260	1.05136e+07	1.0756e+07	1.04497e+07	8.93743e+06	899072	921081	952868	955546	826424	862356	815781	810897	4.61865e+06	4.99342e+06	5.07815e+06	5.69471e+06	5.05269e+06	5.08597e+06	6.42258e+06	6.58727e+06
M155T287	2,3-Butanediol	155.107	286.8	154.012	3.1932	C4H10O2S2	[M+H]+	Organooxygen compounds	Alcohols and polyols	C00265		513-85-9 / 3483-12-3	HMDB0003156	BioDeepDB	2	pos	983597	133393	1.75679e+06	838257	4.55996e+06	2.93624e+06	3.67925e+06	269304	2.17437e+06	4.12452e+06	1.75874e+06	1.63341e+06	1.77039e+06	2.44283e+06	2.27073e+06	2.0474e+06	1.39444e+06	3.29337e+06	3.38666e+06	1.03275e+06	1.96469e+06	2.44304e+06	2.92084e+06	319476
M156T45	L-Histidine	156.043	44.6	155.07	18.4216	C6H9N3O2	[M+H]+	Carboxylic acids and derivatives	Amino acids, peptides, and analogues	C00135	Cancer: overview; Membrane transport; Metabolism of other amino acids; Digestive system; Biosynthesis of other secondary metabolites; Translation; Amino acid metabolism; Chemical structure transformation maps; Global and overview maps	71-00-1	HMDB0000177	BioDeepDB	2	pos	712317	639802	2.49223e+06	687270	3.10002e+06	1.75913e+06	4.29402e+06	722614	2.48877e+06	3.84077e+06	2.91072e+06	4.15437e+06	1.46795e+06	2.37688e+06	2.9005e+06	3.89612e+06	2.11181e+06	4.13676e+06	5.87053e+06	1.38162e+06	3.83761e+06	1.83508e+06	5.29898e+06	1.44704e+06
M157T83	Uracil 5-carboxylate	156.966	83.2	156.017	0.0216197	C5H4N2O4	[M+H]+			C03030		23945-44-0		BioDeepDB	2	pos	5.04839e+07	4.63693e+07	4.74993e+07	4.74951e+07	5.30633e+07	5.97752e+07	5.31317e+07	5.86983e+07	4.93124e+07	5.48458e+07	5.90075e+07	4.69925e+07	3.94832e+07	3.37826e+07	4.45034e+07	8.36678e+07	9.51794e+07	5.42087e+07	5.01384e+07	5.22454e+07	5.59969e+07	6.96461e+07	5.44315e+07	9.62317e+07
M159T428	4,5-Dihydroorotic acid	158.959	427.6	158.033	12.6583	C5H6N2O4	[M+H]+	Carboxylic acids and derivatives	Amino acids, peptides, and analogues	C00337	Global and overview maps; Nucleotide metabolism	155-54-4 / 5988-19-2	HMDB0000528	BioDeepDB	2	pos	4.30944e+07	2.94766e+07	3.99125e+07	1.17304e+07	3.67039e+07	3.90829e+07	3.12726e+07	1.87752e+07	2.95033e+07	3.1391e+07	3.33561e+07	3.65912e+07	2.78952e+07	3.36947e+07	2.83793e+07	3.36629e+07	2.75885e+07	2.87227e+07	3.11829e+07	2.64456e+07	3.59423e+07	3.88723e+07	4.378e+07	4.00739e+07
M158T425	Pelargonic acid	158.154	425.5	158.131	4.55352	C9H18O2	[M]+	Fatty Acyls	Fatty acids and conjugates	C01601		112-05-0	HMDB0000847	BioDeepDB	2	pos	8.41591e+07	8.12143e+07	7.9786e+07	7.9558e+07	7.74877e+07	8.54562e+07	7.61436e+07	7.7946e+07	7.78585e+07	7.64007e+07	7.30622e+07	8.16656e+07	8.0646e+07	7.25605e+07	7.85917e+07	7.01238e+07	7.4374e+07	7.40227e+07	7.7589e+07	7.30019e+07	3.73452e+07	7.04368e+07	7.49846e+07	7.20195e+07
M166T101	L-Phenylalanine	166.087	100.8	165.079	3.03721	C9H11NO2	[M+H]+			C00079	Cancer: overview; Membrane transport; Metabolism of other amino acids; Digestive system; Biosynthesis of other secondary metabolites; Translation; Amino acid metabolism; Chemical structure transformation maps; Global and overview maps	673-06-3		BioDeepDB	2	pos	8.18715e+06	8.20352e+06	6.55615e+06	5.41117e+06	8.95686e+06	5.31911e+06	6.71642e+06	4.05894e+06	6.22818e+06	4.94049e+06	2.82581e+06	7.52978e+06	4.56707e+06	7.20535e+06	5.70084e+06	7.3174e+06	7.18581e+06	8.13213e+06	2.01278e+06	4.42644e+06	7.07052e+06	6.958e+06	4.19267e+06	3.25955e+06
M167T62	Desaminotyrosine	167.016	61.6	166.063	20.1113	C9H10O3	[M+H]+	Phenylpropanoic acids		C01744		501-97-3	HMDB0002199	BioDeepDB	2	pos	9.48567e+06	8.70961e+06	9.2527e+06	8.95729e+06	9.17562e+06	7.71529e+06	1.23522e+07	7.14218e+06	1.03584e+07	6.77525e+06	8.56174e+06	7.18976e+06	1.10167e+07	7.06611e+06	1.02767e+07	7.10016e+06	1.05831e+07	1.21206e+07	1.01781e+07	9.14946e+06	7.22259e+06	1.06959e+07	6.82699e+06	6.43013e+06
M169T231	Uric acid	169.05	231.3	168.028	17.5818	C5H4N4O3	[M+H]+	Imidazopyrimidines	Purines and purine derivatives	C00366	Global and overview maps; Nucleotide metabolism; Digestive system	69-93-2	HMDB0000289	BioDeepDB	2	pos	6.44487e+06	4.60824e+06	6.21213e+06	7.88958e+06	1.33934e+06	1.39238e+06	1.56224e+06	1.17995e+06	1.5579e+06	762045	903330	1.93028e+06	669076	646920	554611	591872	4.66291e+06	4.21084e+06	3.91313e+06	3.85762e+06	2.66372e+06	2.13612e+06	2.38829e+06	2.29111e+06
M171T341	Dihydroxyacetone phosphate	171.149	340.8	169.998	1.89394	C3H7O6P	[M+H]+	Organooxygen compounds	Carbohydrates and carbohydrate conjugates	C00111	Metabolism of cofactors and vitamins; Carbohydrate metabolism; Lipid metabolism; Energy metabolism; Global and overview maps	57-04-5	HMDB0001473	BioDeepDB	2	pos	8.22456e+06	7.25079e+06	5.38656e+06	2.91911e+06	9.97336e+06	1.14672e+07	8.96814e+06	5.20775e+06	9.58293e+06	8.80573e+06	5.28394e+06	5.20949e+06	4.2633e+06	4.72885e+06	7.205e+06	8.15011e+06	3.88013e+06	1.08567e+07	1.27576e+07	6.7866e+06	6.25513e+06	5.55331e+06	8.97765e+06	7.81506e+06
M172T88	3-Dehydroshikimate	171.993	88.3	172.037	2.49507	C7H8O5	[M]+			C02637	Chemical structure transformation maps; Amino acid metabolism; Global and overview maps; Metabolism of terpenoids and polyketides	2922-42-1		BioDeepDB	2	pos	2.45827e+08	4.13157e+07	1.19977e+08	1.04239e+08	4.50318e+08	1.56027e+08	3.13313e+08	6.58349e+07	4.29252e+08	1.91249e+08	2.15022e+08	4.63463e+08	1.78161e+08	6.51793e+07	1.50112e+08	6.15177e+07	6.21936e+07	6.36905e+07	2.06964e+08	1.95164e+07	2.3932e+08	6.40404e+07	5.6607e+07	1.15792e+08
M177T147	N-Formyl-L-methionine	176.97	147.1	177.046	11.2636	C6H11NO3S	[M]+	Carboxylic acids and derivatives	Amino acids, peptides, and analogues	C03145	Amino acid metabolism	4289-98-9	HMDB0001015	BioDeepDB	2	pos	2.26416e+06	197237	3.08534e+06	798008	4.13811e+06	888336	895477	2.49549e+06	870071	218802	213142	3.57355e+06	1.13148e+06	903833	914271	1.75837e+06	819655	935610	2.29859e+06	1.27701e+07	1.22805e+06	968825	955351	1.63288e+06
M177T202	Methyl beta-D-galactoside	176.97	201.9	194.079	11.4453	C7H14O6	[M+H-H2O]+			C03619	Membrane transport	1824-94-8		BioDeepDB	2	pos	1.50382e+07	2.344e+07	7.45288e+06	1.18682e+07	3.55521e+06	2.03064e+07	7.6819e+06	4.29871e+06	1.148e+07	2.44353e+07	7.73657e+06	2.11641e+07	7.69494e+06	1.5559e+07	1.0171e+07	6.75332e+06	1.59884e+07	3.8615e+07	1.95571e+07	1.09195e+07	2.06618e+07	2.27718e+07	1.60599e+07	6.43624e+06
M182T59	Acetylcholine chloride	182.029	59.3	181.087	0.18482	C7H16NO2. Cl	[M+H]+			C08201		60-31-1		BioDeepDB	2	pos	5.73624e+07	4.32269e+07	5.36967e+07	4.42742e+07	3.95564e+07	5.46617e+07	4.68562e+07	4.00736e+07	4.37027e+07	4.05697e+07	4.06703e+07	3.72523e+07	4.19148e+07	3.8313e+07	4.87659e+07	3.64344e+07	4.59796e+07	4.8664e+07	4.17831e+07	4.46508e+07	4.47444e+07	4.5144e+07	3.74036e+07	4.72352e+07
M183T32	Sorbitol	182.987	32.5	182.079	1.79103	C6H14O6	[M+H]+	Organooxygen compounds	Carbohydrates and carbohydrate conjugates	C00794	Carbohydrate metabolism; Membrane transport; Global and overview maps	50-70-4	HMDB0000247	BioDeepDB	2	pos	2.48781e+07	5.66645e+06	6.06664e+06	5.67887e+06	5.69315e+06	5.48592e+06	6.24497e+06	5.34978e+06	2.42331e+07	5.16452e+06	2.79643e+07	5.54081e+06	2.25264e+07	5.52642e+06	5.19562e+06	5.0002e+06	5.81802e+06	5.48383e+06	2.05785e+07	1.94342e+07	1.94535e+07	4.99486e+06	4.64816e+06	2.03125e+07
M183T55	4-Pyridoxic acid	182.987	55.3	183.053	6.96142	C8H9NO4	[M]+	Pyridines and derivatives	Pyridinecarboxylic acids and derivatives	C00847	Metabolism of cofactors and vitamins; Global and overview maps	82-82-6	HMDB0000017	BioDeepDB	2	pos	3.51568e+07	3.28578e+07	3.89735e+07	3.48398e+07	1.82576e+07	1.15102e+07	1.94106e+07	4.53732e+07	2.54975e+07	3.00713e+07	2.96563e+07	2.81668e+07	1.29092e+07	1.54424e+07	1.17428e+07	1.82905e+07	1.03051e+08	1.03787e+08	1.17229e+08	1.13589e+08	6.25416e+07	6.23988e+07	5.64198e+07	5.39533e+07
M200T52	Dodecanoic acid	199.976	52.4	200.178	3.35954	C12H24O2	[M]+	Fatty Acyls	Fatty acids and conjugates	C02679	Lipid metabolism; Biosynthesis of other secondary metabolites; Global and overview maps	143-07-7	HMDB0000638	BioDeepDB	2	pos	1.26124e+06	2.59473e+06	3.01579e+06	3.11793e+06	7.21876e+06	2.73873e+06	2.52024e+06	9.68021e+06	2.20011e+07	3.75201e+06	2.81241e+06	2.99686e+06	5.81607e+06	2.73651e+06	6.80027e+06	5.27903e+06	621377	6.36534e+06	2.13152e+06	1.25232e+07	1.97517e+06	1.05023e+07	2.74727e+06	2.87467e+06
M187T372	Undecanoic acid	186.954	372.2	186.162	12.9298	C11H22O2	[M+H]+	Fatty Acyls	Fatty acids and conjugates	C17715		112-37-8	HMDB0000947	BioDeepDB	2	pos	2.75776e+07	3.96236e+06	4.08367e+06	3.99842e+06	3.8529e+06	3.83874e+06	1.045e+07	9.94273e+06	1.21759e+07	3.58732e+06	3.60652e+06	3.62176e+06	1.22002e+07	3.67221e+06	8.793e+06	3.36075e+06	9.83455e+06	2.5177e+07	1.13726e+07	2.06127e+07	3.48299e+06	3.50593e+06	8.47757e+06	8.92366e+06
M198T637	Vanillylmandelic acid	198.186	637.5	198.053	4.20035	C9H10O5	[M]+	Phenols	Methoxyphenols	C05584	Amino acid metabolism; Global and overview maps	55-10-7	HMDB0000291	BioDeepDB	2	pos	1.10322e+07	9.83585e+06	1.56225e+07	1.70438e+07	2.16799e+07	6.91494e+06	3.35078e+07	1.34272e+07	1.03984e+07	6.91268e+06	9.07573e+06	1.57857e+07	3.30481e+07	1.94027e+07	4.67413e+07	2.4607e+07	1.11478e+07	1.50527e+07	1.54305e+07	1.15741e+07	1.6485e+07	2.61394e+07	9.15658e+06	1.05241e+07
M216T358	12-Hydroxydodecanoic acid	216.196	357.7	216.173	1.89128	C12H24O3	[M]+	Hydroxy acids and derivatives	Medium-chain hydroxy acids and derivatives	C08317		505-95-3	HMDB0002059	BioDeepDB	2	pos	1.51724e+06	1.43692e+06	1.60153e+06	1.62459e+06	1.74317e+06	1.50677e+06	1.65519e+06	1.54858e+06	1.91531e+06	1.88724e+06	1.84281e+06	1.81468e+06	1.62492e+06	1.73905e+06	1.68789e+06	1.63756e+06	1.85752e+06	1.79561e+06	1.71083e+06	1.69626e+06	1.67989e+06	1.31588e+06	1.54213e+06	1.59123e+06
M218T314	N-Acetylserotonin	218.212	314.3	218.106	2.6133	C12H14N2O2	[M]+	Indoles and derivatives	Hydroxyindoles	C00978	Amino acid metabolism; Global and overview maps	1210-83-9	HMDB0001238	BioDeepDB	2	pos	1.37104e+07	9.32891e+06	1.23644e+07	1.40102e+07	1.09508e+07	1.05647e+07	1.48778e+07	1.11753e+07	7.47857e+06	1.58865e+07	1.52474e+07	8.26552e+06	1.70495e+07	7.18177e+06	8.17936e+06	1.4691e+07	9.18617e+06	6.54405e+06	7.96856e+06	1.09685e+07	1.30165e+07	1.06388e+07	1.06002e+07	1.8657e+07
M204T525	L-Tryptophan	204.139	524.8	204.09	1.85339	C11H12N2O2	[M]+	Indoles and derivatives	Indolyl carboxylic acids and derivatives	C00078	Cancer: overview; Nervous system; Digestive system; Development and regeneration; Biosynthesis of other secondary metabolites; Translation; Amino acid metabolism; Chemical structure transformation maps; Infectious disease: parasitic; Global and overview maps	153-94-6	HMDB0013609	BioDeepDB	2	pos	1.165e+07	1.0254e+07	1.19065e+07	1.11734e+07	9.96114e+06	9.43151e+06	1.12673e+07	9.38812e+06	1.3591e+07	1.39993e+07	1.36912e+07	1.08736e+07	7.86317e+06	7.68236e+06	8.62132e+06	6.47948e+06	1.5867e+07	1.95433e+07	1.42964e+07	1.54781e+07	8.70972e+06	8.93144e+06	1.02959e+07	9.62693e+06
M225T305	Methyl jasmonate	225.149	305	224.141	1.00065	C13H20O3	[M+H]+	Fatty Acyls	Lineolic acids and derivatives	C11512	Lipid metabolism; Global and overview maps	1211-29-6 / 39924-52-2	HMDB0036583	BioDeepDB	2	pos	4.19903e+06	831571	1.03208e+06	4.56319e+06	4.4122e+06	3.16466e+06	6.48654e+06	3.63896e+06	4.38736e+06	3.14573e+06	3.38524e+06	3.22453e+06	3.50186e+06	2.93055e+06	5.33301e+06	3.45136e+06	3.90118e+06	3.90119e+06	3.52488e+06	831630	3.40036e+06	3.11846e+06	2.99603e+06	108304
M209T497	L-Kynurenine	209.154	497.3	208.085	2.04771	C10H12N2O3	[M+H]+	Organooxygen compounds	Carbonyl compounds	C00328	Amino acid metabolism; Infectious disease: parasitic; Global and overview maps	2922-83-0 / 343-65-7	HMDB0000684	BioDeepDB	2	pos	4.00666e+06	3.57406e+06	3.56997e+06	3.79013e+06	4.02772e+06	3.03756e+06	3.45989e+06	3.31365e+06	4.2646e+06	4.94137e+06	4.88676e+06	4.10712e+06	3.31519e+06	3.79754e+06	3.63823e+06	2.9946e+06	4.89037e+06	5.65205e+06	5.81453e+06	4.04518e+06	4.19594e+06	2.98587e+06	4.08448e+06	4.14665e+06
M224T49	Hydroxykynurenine	224.127	49.1	224.08	4.15841	C10H12N2O4	[M]+	Organooxygen compounds	Carbonyl compounds	C02794		484-78-6 / 2147-61-7	HMDB0000732	BioDeepDB	2	pos	8.45027e+06	8.09028e+06	7.41913e+06	6.54439e+06	8.54952e+06	7.91692e+06	8.88125e+06	7.11017e+06	8.64104e+06	8.09171e+06	8.13662e+06	8.08429e+06	8.75569e+06	8.13433e+06	8.00689e+06	7.71941e+06	7.5951e+06	8.53065e+06	8.30791e+06	8.19913e+06	8.07576e+06	7.68792e+06	8.87063e+06	8.02105e+06
M243T54_2	1-Hexadecanol	243.184	53.7	242.261	7.57538	C16H34O	[M+H]+	Fatty Acyls	Fatty alcohols	C00823	Lipid metabolism	36653-82-4	HMDB0003424	BioDeepDB	2	pos	5.30101e+08	8.07682e+08	7.58194e+08	9.60569e+08	4.35101e+08	2.2535e+08	5.67895e+08	4.89354e+08	6.91326e+08	4.16292e+08	5.39294e+08	6.08452e+08	7.9719e+08	4.33606e+08	6.51183e+08	6.89636e+08	3.90443e+08	4.98527e+08	4.41297e+08	5.11045e+08	7.04959e+08	4.50808e+08	3.39451e+08	2.30711e+08
M226T374	Porphobilinogen	226.18	374.2	226.095	0.0841937	C10H14N2O4	[M]+	Organonitrogen compounds	Amines	C00931	Metabolism of cofactors and vitamins; Global and overview maps	487-90-1	HMDB0000245	BioDeepDB	2	pos	2.5835e+07	3.10659e+07	2.51562e+07	2.86887e+07	2.20873e+07	1.89323e+07	2.83967e+07	2.89521e+07	2.12061e+07	2.00899e+07	8.10924e+06	2.20329e+07	3.11692e+07	1.88382e+07	2.58919e+07	3.18847e+07	2.53065e+07	2.92937e+07	3.05804e+07	2.78936e+07	2.89351e+07	2.8897e+07	2.71891e+07	1.72652e+07
M228T499	Deoxyuridine	228.197	499.1	228.075	6.27252	C9H12N2O5	[M]+	Pyrimidine nucleosides	Pyrimidine 2'-deoxyribonucleosides	C00526	Membrane transport; Global and overview maps; Nucleotide metabolism	951-78-0	HMDB0000012	BioDeepDB	2	pos	1.41956e+07	3.06239e+06	1.09022e+07	2.59263e+06	1.41255e+07	3.82785e+06	8.62827e+06	3.82956e+06	8.00492e+06	596546	2.92265e+06	3.7194e+06	1.462e+07	1.25752e+07	1.19144e+07	1.2587e+07	2.7636e+06	6.56996e+06	3.09601e+06	831157	6.86546e+06	3.08291e+06	1.32225e+07	2.68257e+06
M256T610	Palmitic acid	256.264	610.2	256.24	2.94065	C16H32O2	[M]+	Fatty Acyls	Fatty acids and conjugates	C00249	Lipid metabolism; Chemical structure transformation maps; Global and overview maps	57-10-3	HMDB0000220	BioDeepDB	2	pos	4.77982e+08	4.41251e+08	5.19812e+08	4.50567e+08	5.21612e+08	4.76276e+08	4.66019e+08	4.30806e+08	5.01045e+08	4.72868e+08	4.26984e+08	5.26812e+08	4.51383e+08	4.43705e+08	4.62795e+08	4.2845e+08	5.02861e+08	4.95934e+08	4.92358e+08	4.59975e+08	4.39654e+08	4.81322e+08	3.30158e+08	4.21838e+08
M252T53	5'-Deoxyadenosine	252.108	53.4	251.102	2.28473	C10H13N5O3	[M+H]+	5'-deoxyribonucleosides		C05198		4754-39-6	HMDB0001983	BioDeepDB	2	pos	3.29104e+06	745484	2.16673e+06	599723	3.40289e+06	1.3399e+07	1.92069e+06	768332	1.74836e+06	4.6751e+06	4.97704e+06	5.20414e+06	2.20061e+06	4.11842e+06	2.23574e+06	4.11528e+06	1.61769e+06	549823	2.06578e+06	2.31397e+06	3.26073e+06	2.05676e+06	552988	1.7707e+06
M252T72	2'-Deoxyadenosine	252.109	72.3	251.102	0.895421	C10H13N5O3	[M+H]+			C00559	Membrane transport; Global and overview maps; Nucleotide metabolism	16373-93-6	HMDB0000101	BioDeepDB	2	pos	6.08458e+06	1.05877e+07	2.32818e+07	1.64569e+07	2.09239e+07	1.03251e+07	1.19345e+07	1.15864e+07	6.74604e+06	1.07028e+07	1.05915e+07	1.52544e+07	7.89298e+06	1.07712e+07	2.85244e+07	1.41798e+07	7.98572e+06	1.74552e+07	1.01335e+07	2.27787e+07	7.94727e+07	3.15449e+07	5.14145e+06	7.80496e+06
M272T249	17a-Estradiol	272.185	249	272.178	2.25469	C18H24O2	[M]+	Steroids and steroid derivatives	Estrane steroids	C02537	Lipid metabolism	57-91-0	HMDB0000429	BioDeepDB	2	pos	9.66208e+06	9.26686e+06	9.56122e+06	1.03206e+07	3.21143e+06	3.24194e+06	3.65708e+06	2.92765e+06	3.73031e+06	4.56677e+06	4.76206e+06	3.23173e+06	966504	1.01447e+06	658562	3.01698e+06	6.82713e+06	6.73898e+06	6.17149e+06	6.25713e+06	4.25645e+06	4.06738e+06	4.20429e+06	4.2585e+06
M280T545	Linoleic acid	280.263	544.9	280.24	2.04165	C18H32O2	[M]+	Fatty Acyls	Lineolic acids and derivatives	C01595	Lipid metabolism; Chemical structure transformation maps; Global and overview maps	60-33-3	HMDB0000673	BioDeepDB	2	pos	1.29758e+06	1.09071e+06	1.13391e+06	588538	1.27012e+06	2.16822e+06	1.22143e+06	1.21458e+06	3.26405e+06	3.08415e+06	3.18349e+06	727392	631990	3.67916e+06	633031	3.55807e+06	2.42558e+06	2.70422e+06	2.08112e+06	1.6616e+06	908808	1.08079e+06	860698	575366
M282T572	(6Z)-Octadecenoic acid	282.279	572.4	282.256	3.63859	C18H34O2	[M]+			C08363		593-39-5		BioDeepDB	2	pos	8.04485e+07	1.4634e+08	1.48112e+08	1.31321e+08	1.07754e+08	1.08479e+08	8.28289e+07	1.1675e+08	1.49224e+08	7.45331e+07	2.54751e+07	1.4436e+08	1.64909e+08	7.82922e+07	1.02239e+08	1.47394e+08	1.08042e+08	1.34626e+08	1.04529e+08	1.14732e+08	5.18945e+07	1.68525e+08	1.67577e+07	3.81654e+07
M267T516	Stearic acid	267.172	516.3	284.272	1.04396	C18H36O2	[M+H-H2O]+	Fatty Acyls	Fatty acids and conjugates	C01530	Lipid metabolism; Chemical structure transformation maps; Sensory system	57-11-4 / 646-29-7	HMDB0000827	BioDeepDB	2	pos	7.17293e+06	2.73941e+07	2.12996e+07	3.71231e+07	4.76607e+06	2.12628e+07	2.24756e+07	1.97397e+07	4.35596e+06	4.25358e+06	3.96135e+06	4.21673e+06	4.08814e+06	4.22703e+06	3.35688e+07	9.92311e+06	4.91803e+07	4.89203e+07	4.2984e+07	4.7704e+07	2.55118e+07	1.79274e+07	2.35422e+07	1.33041e+07
M282T519	1-Methyladenosine	282.113	519.3	281.112	23.1319	C11H15N5O4	[M+H]+	Purine nucleosides		C02494		15763-06-1	HMDB0003331	BioDeepDB	2	pos	4.05375e+07	5.03551e+07	6.4888e+07	3.80231e+07	2.34088e+07	7.528e+07	6.66297e+07	5.92694e+07	1.2172e+07	3.64546e+07	1.73133e+07	1.6638e+07	5.39393e+07	5.21229e+07	3.05603e+07	4.12849e+07	5.53963e+07	5.84182e+07	6.42273e+07	5.79739e+07	4.90992e+07	5.76421e+07	6.10744e+07	2.7354e+07
M284T673	Glycitein	284.296	673.2	284.068	2.48926	C16H12O5	[M]+	Isoflavonoids	Isoflav-2-enes	C14536	Biosynthesis of other secondary metabolites; Global and overview maps	40957-83-3 / NA	HMDB0005781	BioDeepDB	2	pos	3.8638e+08	2.79156e+08	3.12989e+08	2.91395e+08	3.35439e+08	3.38951e+08	8.13041e+07	3.12156e+08	3.33275e+08	3.25514e+08	3.26015e+08	3.98635e+08	4.16023e+08	8.93156e+07	3.09044e+08	1.14628e+08	3.40682e+08	8.4341e+07	3.5684e+08	3.77094e+08	3.72478e+08	3.65659e+08	3.49999e+08	3.46113e+08
M298T157	5'-Methylthioadenosine	298.096	156.5	297.09	2.93865	C11H15N5O3S	[M+H]+	5'-deoxyribonucleosides	5'-deoxy-5'-thionucleosides	C00170	Chemical structure transformation maps; Amino acid metabolism; Global and overview maps; Metabolism of terpenoids and polyketides	2457-80-9	HMDB0001173	BioDeepDB	2	pos	303264	169494	165522	541431	484673	701193	420729	436255	172733	322618	717723	334807	366755	493791	488324	138520	544113	151034	497956	486128	404737	402520	411389	227691
M302T440	Quercetin	302.305	439.6	302.043	2.3723	C15H10O7	[M]+			C00389	Signal transduction; Biosynthesis of other secondary metabolites; Global and overview maps	522-12-3	HMDB0005794	BioDeepDB	2	pos	7.88543e+06	1.10571e+06	1.56892e+07	876214	2.24466e+07	3.3131e+07	2.44039e+07	672192	2.86121e+07	4.56397e+06	2.24957e+07	2.47499e+07	2.66919e+07	4.88239e+06	3.23225e+06	2.23278e+07	4.43667e+07	513530	9.52411e+06	1.94497e+07	2.0363e+06	611651	1.1478e+07	1.7547e+07
M321T607	Pregnanediol	321.315	607.3	320.272	1.26345	C21H36O2	[M+H]+	Steroids and steroid derivatives	Pregnane steroids	C05484	Lipid metabolism; Global and overview maps	80-92-2	HMDB0004025	BioDeepDB	2	pos	2.26607e+08	1.53429e+08	2.02328e+08	1.05134e+08	8.36815e+07	8.28238e+07	1.11808e+07	1.92395e+07	2.25238e+07	7.19086e+07	2.64915e+07	7.63095e+07	5.29353e+07	4.54774e+07	1.15227e+07	5.62822e+07	8.47707e+07	1.31858e+08	1.14367e+08	8.59238e+07	7.93295e+07	4.7726e+07	8.37678e+06	8.9035e+06
M312T533	Aflatoxin B1	312.362	532.6	312.063	1.32647	C17H12O6	[M]+	Coumarins and derivatives	Furanocoumarins	C06800	Biosynthesis of other secondary metabolites; Global and overview maps; Xenobiotics biodegradation and metabolism; Cancer: specific types	1162-65-8	HMDB0006552	BioDeepDB	2	pos	1.77735e+08	1.97008e+08	1.95816e+08	1.83445e+08	1.88351e+08	1.83962e+08	1.31148e+08	1.24702e+08	1.32549e+08	1.62978e+08	2.6246e+08	1.34219e+08	1.942e+08	2.11307e+08	1.04842e+08	1.59662e+08	2.1558e+08	1.80799e+08	1.93257e+08	1.54793e+08	1.71632e+08	1.98262e+08	2.48861e+08	1.31507e+08
M312T598	Arachidic acid	312.328	598.4	312.303	8.31095	C20H40O2	[M]+	Fatty Acyls	Fatty acids and conjugates	C06425	Lipid metabolism	506-30-9	HMDB0002212	BioDeepDB	2	pos	6.95358e+07	2.77176e+07	3.02826e+07	3.7742e+07	1.14642e+07	9.44186e+06	2.88267e+07	1.45105e+07	3.7349e+07	7.07635e+07	5.51501e+07	3.49983e+07	2.51815e+07	6.59956e+07	7.67017e+07	1.29757e+07	1.92693e+08	2.01086e+08	1.20139e+08	1.23258e+08	1.72997e+08	1.52126e+08	6.99309e+07	5.89758e+07
M336T653	12-Keto-tetrahydro-leukotriene B4	336.327	652.8	336.23	7.38722	C20H32O4	[M]+	Fatty Acyls	Eicosanoids	C02165	Nervous system; Sensory system; Digestive system; Endocrine system; Lipid metabolism; Signaling molecules and interaction; Structure-based classification; Global and overview maps	71160-24-2	HMDB0002995	BioDeepDB	2	pos	1.70816e+08	7.18578e+06	3.28682e+06	4.40038e+06	7.6683e+06	7.11449e+06	4.24234e+07	1.89508e+08	9.15456e+06	6.37443e+06	9.41686e+06	4.85237e+06	9.91341e+06	2.61815e+06	1.10472e+07	3.41736e+06	7.5646e+06	3.3318e+06	7.0276e+07	5.74651e+06	1.66373e+08	3.69037e+06	6.08515e+07	3.44674e+07
M338T607_1	Erucic acid	338.342	607	338.318	1.9811	C22H42O2	[M]+	Fatty Acyls	Fatty acids and conjugates	C08316	Lipid metabolism	112-86-7	HMDB0002068	BioDeepDB	2	pos	1.45961e+10	1.33059e+10	1.37322e+10	1.68532e+10	4.71371e+08	7.63071e+08	5.24388e+09	1.84082e+08	4.41818e+09	8.15594e+09	5.41509e+09	4.29004e+09	3.26466e+08	2.86095e+08	2.68791e+09	1.48531e+08	2.42468e+10	2.17129e+10	1.5047e+10	2.08898e+10	9.05831e+09	1.36917e+10	8.52592e+09	7.62149e+09
M343T405	Sucrose	343.294	405.2	342.116	1.34611	C12H22O11	[M+H]+	Organooxygen compounds	Carbohydrates and carbohydrate conjugates	C00089	Membrane transport; Sensory system; Digestive system; Carbohydrate metabolism; Global and overview maps	57-50-1	HMDB0000258	BioDeepDB	2	pos	3.05772e+06	2.4909e+06	3.29926e+06	2.8084e+06	4.80227e+06	5.22047e+06	3.70153e+06	4.1558e+06	3.1334e+06	2.35155e+06	1.02243e+06	2.44626e+06	1.32168e+06	1.80628e+06	1.06595e+06	767159	5.5567e+06	7.73856e+06	5.19675e+06	4.81899e+06	6.7083e+06	5.3985e+06	5.48186e+06	6.71174e+06
M334T404	Nicotinamide ribotide	334.294	404	334.057	2.66802	C11H15N2O8P	[M]+	Pyridine nucleotides	Nicotinamide nucleotides	C00455	Metabolism of cofactors and vitamins; Global and overview maps	1094-61-7	HMDB0000229	BioDeepDB	2	pos	15626	75266	1.76604e+06	11133.4	13905.9	277524	2.69844e+06	62357.2	178385	267702	183981	154397	70919.9	101389	126155	60215.4	1.03554e+07	1.72234e+07	4.31681e+06	3.09474e+06	1.75594e+06	2.18062e+06	2.29454e+06	6.09056e+06
M361T547	Aldosterone	361.222	547.4	360.194	0.333746	C21H28O5	[M+H]+	Steroids and steroid derivatives	Hydroxysteroids	C01780	Excretory system; Endocrine system; Lipid metabolism; Target-based classification: Nuclear receptors; Global and overview maps	52-39-1	HMDB0000037	BioDeepDB	2	pos	3.66864e+06	8.22325e+06	4.4772e+06	1.81367e+07	2.74838e+06	3.69841e+06	1.26818e+07	1.22407e+07	1.22791e+07	1.01772e+07	7.41584e+06	3.56349e+06	2.99148e+06	2.58574e+06	3.38146e+06	4.49805e+06	5.22688e+06	3.8883e+06	3.28582e+06	8.58329e+06	2.97337e+06	9.6867e+06	2.14445e+06	2.19641e+06
M343T48	Trehalose	343.123	48.4	342.116	0.666754	C12H22O11	[M+H]+	Organooxygen compounds	Carbohydrates and carbohydrate conjugates	C01083	Carbohydrate metabolism; Membrane transport; Global and overview maps	99-20-7	HMDB0000975	BioDeepDB	2	pos	1.71443e+06	2.12227e+06	1.68757e+06	1.6562e+06	354753	1.79236e+06	2.27833e+06	2.31005e+06	3.07297e+06	3.18779e+06	2.71268e+06	2.04403e+06	24973.4	25277.5	1.03213e+06	965338	7.86056e+06	8.97684e+06	7.75851e+06	9.38557e+06	9.85153e+06	9.61308e+06	9.40331e+06	1.09327e+07
M347T502	Corticosterone	347.22	501.5	346.214	3.6749	C21H30O4	[M+H]+	Steroids and steroid derivatives	Hydroxysteroids	C02140	Lipid metabolism; Neurodegenerative disease; Global and overview maps; Endocrine system	50-22-6	HMDB0001547	MoNA	2	pos	985790	618578	886561	981558	1.04187e+06	1.2264e+06	1.23251e+06	928193	997950	1.03194e+06	1.1876e+06	692177	885721	992591	891429	389092	1.27277e+06	528713	1.04319e+06	902761	689328	806420	645926	897008
M346T476	Cyclic GMP	346.333	476.5	345.047	2.13237	C10H12N5O7P	[M+H]+	Purine nucleotides	Cyclic purine nucleotides	C00942	Circulatory system; Nervous system; Signal transduction; Sensory system; Endocrine system; Digestive system; Environmental adaptation; Nucleotide metabolism; Cellular community - eukaryotes; Immune system; Global and overview maps	7665-99-8	HMDB0001314	BioDeepDB	2	pos	1.78667e+06	708256	1.50441e+06	484057	1.39551e+06	2.57028e+06	153047	121458	1.44542e+06	1.06749e+06	1.45357e+06	1.74528e+06	1.92999e+06	1.24163e+06	777006	1.67007e+06	2.77771e+06	160470	1.4275e+06	1.56865e+06	1.03203e+06	949391	770352	1.25424e+06
M376T491_1	Lithocholic acid	376.313	490.9	376.298	0.0900373	C24H40O3	[M]+	Lipids and lipid-like molecules	Steroids and steroid derivatives	C03990	Lipid metabolism; Digestive system	434-13-9	HMDB0000761	BioDeepDB	2	pos	2.57928e+08	3.73364e+08	2.64956e+08	2.22681e+08	3.82242e+08	3.69514e+08	2.71892e+08	3.52529e+08	3.6016e+08	3.06643e+08	3.65422e+08	3.72266e+08	3.82973e+08	4.54406e+08	7.81346e+07	4.04358e+08	1.69847e+08	2.93228e+08	1.72573e+08	1.26023e+08	4.58005e+08	1.10505e+08	1.2964e+08	2.12063e+08
M362T406_1	Thyrotropin releasing hormone	362.327	405.8	362.17	0.540128	C16H22N6O4	[M]+	Carboxylic acids and derivatives	Amino acids, peptides, and analogues	C03958		24305-27-9	HMDB0060080	BioDeepDB	2	pos	7.59441e+06	1.11176e+07	1.38821e+07	7.87205e+06	1.45354e+07	1.45017e+07	7.74844e+06	1.416e+07	1.1843e+07	4.04364e+06	8.03995e+06	9.80801e+06	1.31388e+07	1.13019e+07	5.31531e+06	5.34117e+06	8.53469e+06	9.33497e+06	1.32124e+07	3.89632e+06	4.95571e+06	1.25477e+07	1.99951e+06	1.04512e+06
M364T651	GMP	364.344	651.2	363.058	2.42795	C10H14N5O8P	[M+H]+	Purine nucleotides	Purine ribonucleotides	C00144	Drug resistance: antineoplastic; Signal transduction; Sensory system; Nucleotide metabolism; Chemical structure transformation maps; Global and overview maps	85-32-5	HMDB0001397	BioDeepDB	2	pos	2.27965e+07	1.43153e+06	2.66135e+07	1.50365e+07	2.193e+07	1.81824e+07	1.07047e+07	1.87278e+07	1.4662e+07	1.37263e+07	5.5866e+06	1.21012e+07	1.59805e+06	3.5179e+06	1.17438e+07	1.94564e+07	1.88151e+07	1.82399e+07	1.55269e+07	1.83063e+07	1.80055e+07	2.80678e+07	6.48943e+06	7.62318e+06
M369T677	Cholesterol	369.352	676.9	386.355	0	C27H46O	[M+H-H2O]+	Steroids and steroid derivatives	Cholestane steroids	C00187	Endocrine and metabolic disease; Digestive system; Endocrine system; Lipid metabolism; Xenobiotics biodegradation and metabolism; Metabolism of terpenoids and polyketides; Cancer: specific types; Chemical structure transformation maps; Global and overview maps	57-88-5	HMDB0000067	BioDeepDB	2	pos	4.77798e+07	4.9282e+07	5.6554e+07	3.57533e+07	5.02467e+07	2.6134e+07	3.11619e+07	2.45603e+07	6.03261e+06	7.87321e+06	5.42667e+06	6.32959e+06	6.41601e+06	5.57544e+06	5.29158e+06	5.22653e+06	2.62344e+07	1.57204e+07	2.86909e+07	5.90499e+06	4.62604e+06	5.02538e+06	2.36962e+06	2.44664e+06
M391T577_2	S-Hexyl-glutathione	391.284	577.1	391.178	0.674659	C16H29N3O6S	[M]+			C02886		24425-56-7		BioDeepDB	2	pos	1.02021e+08	3.24963e+07	1.76462e+08	3.91866e+07	8.64062e+07	3.50049e+07	1.25593e+08	6.28601e+07	7.8121e+07	8.25359e+07	4.89849e+07	3.13443e+07	8.716e+07	3.97077e+07	4.90526e+07	1.07144e+08	2.75116e+07	2.57699e+07	2.68713e+07	5.18179e+07	2.55733e+07	2.76116e+07	3.04766e+07	2.86495e+07
M392T502_2	Chenodeoxycholic acid	392.301	501.8	392.293	21.667	C24H40O4	[M]+	Steroids and steroid derivatives	Bile acids, alcohols and derivatives	C02528	Lipid metabolism; Global and overview maps; Digestive system	474-25-9	HMDB0000518	BioDeepDB	2	pos	8.31528e+06	4.45154e+06	6.78605e+06	4.44927e+06	4.28442e+06	4.24368e+06	4.77098e+06	3.8891e+06	5.0318e+06	5.61887e+06	6.15107e+06	4.18827e+06	3.7546e+06	3.87213e+06	4.26383e+06	3.8402e+06	3.14129e+06	9.1143e+06	8.34892e+06	6.64607e+06	8.67293e+06	1.23307e+07	1.33197e+06	4.63549e+06
M384T442	7-Dehydrocholesterol	384.348	442.3	384.339	3.60747	C27H44O	[M]+	Steroids and steroid derivatives	Cholestane steroids	C01164	Lipid metabolism; Global and overview maps; Metabolism of terpenoids and polyketides	434-16-2	HMDB0000032	BioDeepDB	2	pos	8.9352e+06	1.57828e+06	1.99052e+06	8.93237e+06	3.5675e+06	6.07755e+06	3.98186e+06	597488	1.17137e+06	4.20817e+06	3.71098e+06	460954	779330	2.76305e+06	972923	4.66702e+06	1.00472e+06	776180	4.89204e+06	3.16313e+06	3.47252e+06	1.41946e+06	102113	140878
M385T576	S-Adenosylhomocysteine	385.331	576.4	384.122	7.1248	C14H20N6O5S	[M+H]+	5'-deoxyribonucleosides	5'-deoxy-5'-thionucleosides	C00021	Amino acid metabolism; Global and overview maps	979-92-0	HMDB0000939	BioDeepDB	2	pos	3.33422e+06	1.6689e+06	819534	1.72914e+06	3.86686e+06	3.69217e+06	1.57257e+06	1.0636e+06	3.31304e+06	1.53824e+06	4.21764e+06	2.33075e+06	2.33237e+06	3.10728e+06	1.55878e+06	2.72564e+06	2.96405e+06	817662	2.61854e+06	2.48987e+06	2.79143e+06	2.14661e+06	384258	2.37834e+06
M408T651	Allocholic acid	408.37	651.2	408.288	5.21927	C24H40O5	[M]+	Steroids and steroid derivatives	Bile acids, alcohols and derivatives	C00695	Lipid metabolism; Global and overview maps; Digestive system	2464-18-8 / 81-25-4	HMDB0000505	BioDeepDB	2	pos	9.07247e+06	5.33107e+06	1.10493e+07	8.19616e+06	106893	99532.6	6.79082e+06	6.44564e+06	9.5524e+06	1.28821e+07	1.22784e+07	1.25801e+07	4.86538e+06	4.96454e+06	7.54385e+06	7.22275e+06	3.00338e+07	4.68789e+07	2.71694e+07	3.87162e+07	9.15005e+06	2.23624e+06	180818	279793
M415T475_2	Sodium deoxycholate	415.211	475.4	414.275	1.97858	C24H39O4. Na	[M+H]+			C11171		302-95-4		BioDeepDB	2	pos	2.85122e+06	1.81881e+06	1.12981e+07	1.15332e+07	8.16718e+06	2.17271e+07	5.40122e+06	5.06809e+06	3.40798e+06	6.16922e+06	6.9577e+07	2.76874e+06	7.93462e+06	4.76741e+06	7.9233e+06	1.11684e+07	8.45403e+06	3.54172e+07	2.77816e+07	7.20831e+06	2.99043e+06	1.05966e+07	8.74179e+06	7.64941e+06
M426T492_1	Lanosterin	426.321	491.7	426.386	1.79647	C30H50O	[M]+	Prenol lipids	Triterpenoids	C01724	Lipid metabolism; Global and overview maps	79-63-0	HMDB0001251	BioDeepDB	2	pos	3.97681e+06	1.66368e+06	2.25968e+06	3.71236e+06	3.61618e+06	3.70573e+06	3.08364e+06	2.43306e+06	5.86475e+06	4.20229e+06	6.39866e+06	4.50612e+06	4.55751e+06	3.91928e+06	2.8633e+06	3.82228e+06	3.95656e+06	1.45665e+06	1.64583e+06	2.58735e+06	3.32621e+06	3.43149e+06	2.4925e+06	2.87755e+06
M413T651	alpha-Tocopherol	413.326	651.5	430.381	6.79836	C29H50O2	[M+H-H2O]+	Prenol lipids	Quinone and hydroquinone lipids	C02477	Metabolism of cofactors and vitamins; Cell growth and death; Digestive system; Chemical structure transformation maps; Global and overview maps	59-02-9	HMDB0001893	BioDeepDB	2	pos	7.42687e+06	5.53893e+06	5.84382e+06	7.52387e+06	7.60668e+06	9.06615e+06	1.2263e+07	9.06985e+06	7.6649e+06	6.18302e+06	8.19536e+06	7.70591e+06	7.64026e+06	7.68859e+06	6.76023e+06	9.48413e+06	7.86892e+06	5.11129e+06	8.89424e+06	8.43319e+06	7.17957e+06	7.59972e+06	3.73425e+06	6.84767e+06
M432T464_2	Isovitexin	432.237	464	432.106	5.34595	C21H20O10	[M]+			C01714	Biosynthesis of other secondary metabolites	38953-85-4 / 29702-25-8		BioDeepDB	2	pos	1.96115e+08	2.00475e+08	1.53314e+08	1.63781e+08	1.96031e+08	1.77716e+08	1.77292e+08	1.82678e+08	1.63913e+08	1.75318e+08	3.41484e+08	1.44149e+08	1.88537e+08	1.84252e+08	1.73307e+08	1.47034e+08	1.5812e+08	1.67039e+08	1.83314e+08	1.78989e+08	2.04848e+08	1.40218e+08	1.25724e+08	1.08783e+08
M610T585	Rutin	610.181	585.3	610.153	6.60681	C27H30O16	[M]+			C05625	Biosynthesis of other secondary metabolites; Global and overview maps	207671-50-9	HMDB0003249	BioDeepDB	2	pos	8.6921e+07	5.08583e+07	3.01665e+07	1.19093e+08	1.57155e+08	4.20855e+08	1.16448e+07	1.86045e+07	1.98949e+07	4.21652e+07	8.47608e+07	9.33848e+07	4.52369e+07	5.46034e+07	2.16189e+07	1.67853e+07	2.96277e+07	1.71339e+07	8.77604e+06	1.77694e+07	1.69841e+07	1.24142e+07	3.20105e+07	4.93274e+06
M667T48_3	Maltotetraose	667.237	48.2	666.222	10.4717	C24H42O21	[M+H]+	Organooxygen compounds	Carbohydrates and carbohydrate conjugates	C02052		34612-38-9	HMDB0001296	BioDeepDB	2	pos	1.77815e+07	1.45306e+07	2.12518e+07	1.83509e+07	3.11295e+06	5.10374e+06	3.13079e+06	2.09074e+07	2.95496e+06	2.91808e+07	4.29245e+06	3.7462e+06	2.76835e+06	3.21958e+06	2.05786e+06	1.04122e+07	2.17577e+06	7.19677e+06	1.32114e+07	4.71239e+06	2.06959e+07	3.88149e+06	7.05777e+06	4.84277e+06
M104T653	Choline	104.106	653.2	104.108	6.7239	C5H14NO	[M+H]+	Organonitrogen compounds	Quaternary ammonium salts	C00114	Cancer: overview; Membrane transport; Nervous system; Digestive system; Lipid metabolism; Amino acid metabolism; Global and overview maps	62-49-7	HMDB0000097	BioDeepDB	2	pos	1.27297e+08	1.56592e+08	1.70524e+08	1.48088e+08	1.83324e+08	1.76585e+08	2.34675e+08	5.45428e+07	2.28223e+08	4.84165e+07	2.23541e+08	1.46273e+08	5.43166e+07	1.68741e+08	5.2316e+07	2.33141e+08	2.21124e+08	1.72096e+08	1.40313e+08	2.32093e+08	1.44338e+08	2.55021e+08	1.73218e+08	2.42723e+08
M118T49	L-Valine	118.086	49.1	117.079	4.03097	C5H11NO2	[M+H]+	Carboxylic acids and derivatives	Amino acids, peptides, and analogues	C00183	Cancer: overview; Metabolism of cofactors and vitamins; Metabolism of other amino acids; Membrane transport; Digestive system; Biosynthesis of other secondary metabolites; Translation; Amino acid metabolism; Chemical structure transformation maps; Global and overview maps	72-18-4	HMDB0000883	BioDeepDB	2	pos	3.28533e+07	2.59e+07	2.07161e+07	2.32263e+07	5.20843e+07	1.66975e+07	6.66361e+07	2.66984e+07	2.36124e+07	1.19646e+07	2.19107e+07	3.85218e+07	9.29801e+07	5.18732e+07	1.37285e+08	5.10457e+07	4.16372e+07	4.43889e+07	3.87053e+07	3.87491e+07	4.02373e+07	6.74102e+07	1.88782e+07	1.80257e+07
M152T72	Guanine	152.057	72.4	151.049	1.3153	C5H5N5O	[M+H]+	Imidazopyrimidines	Purines and purine derivatives	C00242	Global and overview maps; Nucleotide metabolism	73-40-5	HMDB0000132	BioDeepDB	2	pos	4.13963e+06	3.56948e+06	2.95268e+06	4.21907e+06	1.85363e+06	1.85385e+06	1.93174e+06	1.82357e+06	2.02467e+06	2.15435e+06	2.31462e+06	1.66789e+06	479759	759709	1.11759e+06	2.51187e+06	2.4404e+06	3.21042e+06	2.44751e+06	2.51242e+06	2.26377e+06	2.13851e+06	1.91763e+06	2.16294e+06
M135T464	Chavicol	135.081	463.9	134.073	1.65827	C9H10O	[M+H]+	Phenols	1-hydroxy-2-unsubstituted benzenoids	C16930	Biosynthesis of other secondary metabolites	501-92-8	HMDB0034107	BioDeepDB	2	pos	2.73031e+06	2.42569e+06	2.22407e+06	2.38619e+06	2.23963e+06	2.16458e+06	2.36902e+06	2.50828e+06	2.18427e+06	2.40329e+06	2.17491e+06	2.5717e+06	2.37538e+06	2.33955e+06	2.08941e+06	3.80628e+06	2.45341e+06	2.33622e+06	2.33359e+06	2.5313e+06	2.37778e+06	2.43666e+06	2.33826e+06	2.29969e+06
M136T51	Adenine	136.062	51.1	135.054	1.46992	C5H5N5	[M+H]+	Imidazopyrimidines	Purines and purine derivatives	C00147	Metabolism of terpenoids and polyketides; Global and overview maps; Nucleotide metabolism	73-24-5	HMDB0000034	BioDeepDB	2	pos	1.30557e+07	1.01667e+07	1.32852e+07	1.37601e+07	3.66739e+06	3.33252e+06	3.56572e+06	2.43496e+06	5.252e+06	4.62683e+06	4.07732e+06	4.51119e+06	616040	1.01275e+06	501662	1.4952e+06	1.71949e+07	2.00898e+07	1.58924e+07	1.21638e+07	5.35304e+06	5.74822e+06	4.69248e+06	6.03342e+06
M163T72	Nicotine	163.123	72.3	162.116	0.613034	C10H14N2	[M+H]+	Pyridines and derivatives	Pyrrolidinylpyridines	C00745	Environmental adaptation; Biosynthesis of other secondary metabolites; Xenobiotics biodegradation and metabolism; Substance dependence; Chemical structure transformation maps; Global and overview maps	54-11-5	HMDB0001934	BioDeepDB	2	pos	4.93672e+06	4.3596e+06	5.56077e+06	4.65054e+06	5.44048e+06	5.05341e+06	5.35881e+06	5.0745e+06	6.09951e+06	6.51918e+06	6.29895e+06	5.53916e+06	4.1689e+06	4.10889e+06	4.09661e+06	3.41966e+06	8.31927e+06	1.05618e+07	8.17523e+06	8.32417e+06	4.93358e+06	4.8955e+06	5.40031e+06	5.86537e+06
M175T44	L-Arginine	175.119	44	174.112	2.28416	C6H14N4O2	[M+H]+	Carboxylic acids and derivatives	Amino acids, peptides, and analogues	C00062	Cancer: overview; Membrane transport; Neurodegenerative disease; Biosynthesis of other secondary metabolites; Translation; Amino acid metabolism; Chemical structure transformation maps; Infectious disease: parasitic; Global and overview maps	74-79-3	HMDB0000517	BioDeepDB	2	pos	915235	162107	810797	1.00161e+06	582439	177497	624809	270630	80518.8	236392	2.0874e+06	5.60683e+06	62115.8	60613.1	256731	270213	635170	382055	175773	673124	67162.4	268133	243023	500113
M180T474	Mexiletine	180.139	473.5	179.131	2.22051	C11H17NO	[M+H]+	Phenol ethers		C07220		31828-71-4	HMDB0014523	BioDeepDB	2	pos	1.41039e+06	1.00535e+06	861894	1.34557e+06	1.25133e+06	874454	1.06704e+06	1.73643e+06	1.17514e+06	1.09298e+06	1.9118e+06	1.37703e+06	1.41366e+06	1.32156e+06	2.11493e+06	763862	908067	1.65004e+06	2.07104e+06	1.02451e+06	1.47105e+06	1.23757e+06	974703	1.91485e+06
M193T299	3-(3,4-Dihydroxy-5-methoxy)-2-propenoic acid	193.05	299.5	210.053	22.9682	C10H10O5	[M+H-H2O]+	Cinnamic acids and derivatives	Hydroxycinnamic acids and derivatives	C05619	Chemical structure transformation maps; Biosynthesis of other secondary metabolites; Global and overview maps	1782-55-4/2041-35-2	HMDB0035484	BioDeepDB	2	pos	1.5174e+06	1.5109e+06	1.16107e+06	877736	882555	250561	1.55348e+06	1.61978e+06	1.08095e+06	820432	960270	770539	1.06394e+06	1.01248e+06	1.15674e+06	1.14917e+06	978748	745830	1.24326e+06	1.48048e+06	1.08147e+06	713724	686664	813651
M203T571	Caryophyllene alpha-oxide	203.18	571.3	220.183	21.823	C15H24O	[M+H-H2O]+	Prenol lipids	Sesquiterpenoids	C16908		1139-30-6	HMDB0036789	BioDeepDB	2	pos	1.01037e+07	2.84369e+06	8.8965e+06	2.02237e+06	1.72878e+06	1.77784e+06	1.28161e+06	973341	1.80858e+06	1.28792e+06	2.35354e+06	2.06224e+06	1.00256e+06	1.35911e+06	4.59168e+06	1.42639e+06	1.91333e+07	2.23222e+07	1.31222e+07	1.60145e+07	9.88597e+06	6.14292e+06	4.6311e+06	1.44104e+06
M203T432	(-)-alpha-Curcumene	203.18	431.7	202.172	0.610297	C15H22	[M+H]+	Prenol lipids	Sesquiterpenoids	C09649		4176-17-4	HMDB0061838	BioDeepDB	2	pos	1.77715e+06	815922	426531	297664	298961	230007	201408	243653	1.37186e+06	1.34557e+06	912585	1.2577e+06	7.70586e+06	5.04382e+06	962899	1.06642e+06	826574	340291	199906	196229	264945	179751	148019	163447
M204T50	N-Acetyl-D-glucosamine	204.087	50.3	221.09	21.2361	C8H15NO6	[M+H-H2O]+	Organooxygen compounds	Carbohydrates and carbohydrate conjugates	C00140	Carbohydrate metabolism; Membrane transport; Global and overview maps	7512-17-6	HMDB0000215	BioDeepDB	2	pos	6.78154e+06	6.50426e+06	5.83918e+06	4.54466e+06	4.89799e+06	4.10137e+06	4.04223e+06	3.92848e+06	8.28117e+06	9.09406e+06	7.93916e+06	7.68509e+06	1.51081e+06	2.52251e+06	2.97871e+06	2.04283e+06	9.26392e+06	1.02295e+07	8.93616e+06	1.15956e+07	3.27484e+06	4.65679e+06	4.02136e+06	3.77333e+06
M209T470	Myristoleic acid	209.19	470	226.193	22.1521	C14H26O2	[M+H-H2O]+	Fatty Acyls	Fatty acids and conjugates	C08322		544-64-9/NA	HMDB0002000	BioDeepDB	2	pos	1.16393e+07	2.45774e+07	1.85269e+07	1.80948e+07	2.38419e+07	1.50611e+07	7.3207e+06	1.36084e+07	1.61813e+07	1.63956e+07	1.62846e+07	1.01754e+07	2.17719e+07	2.00303e+07	1.52201e+07	1.96454e+07	1.25469e+07	1.8283e+07	1.43861e+07	1.19532e+07	1.49454e+07	1.34826e+07	5.44461e+06	6.2786e+06
M219T353	Capsidiol	219.175	353	236.178	0.456256	C15H24O2	[M+H-H2O]+	Prenol lipids	Sesquiterpenoids	C09627	Metabolism of terpenoids and polyketides	37208-05-2	HMDB0002352	BioDeepDB	2	pos	3.94938e+06	3.58591e+06	4.17999e+06	3.77476e+06	4.01882e+06	3.71779e+06	3.89672e+06	3.74049e+06	4.3392e+06	4.53642e+06	4.76353e+06	4.64185e+06	3.82968e+06	3.36329e+06	3.81378e+06	3.8052e+06	4.60533e+06	4.6401e+06	4.44568e+06	4.4544e+06	3.86319e+06	4.00739e+06	4.0065e+06	3.89094e+06
M255T337_1	Daidzein	255.066	337.5	254.058	2.74439	C15H10O4	[M+H]+	Isoflavonoids	Isoflav-2-enes	C10208	Chemical structure transformation maps; Biosynthesis of other secondary metabolites; Global and overview maps	486-66-8	HMDB0003312	BioDeepDB	2	pos	54436.1	34043.3	216287	144299	180529	45545.7	10082	19897.4	43821.8	151296	28436.9	127097	212018	173121	150816	195879	116289	36095.3	32772.5	29894.7	23702.4	42302	49946.8	83200.6
M277T527	Stearidonic acid	277.217	526.5	276.209	2.5251	C18H28O2	[M+H]+	Fatty Acyls	Lineolic acids and derivatives	C16300	Lipid metabolism; Global and overview maps	20290-75-9	HMDB0006547	BioDeepDB	2	pos	3.9108e+06	5.60802e+06	6.42212e+06	4.13612e+06	4.38936e+06	3.9626e+06	3.13376e+06	4.45454e+06	7.11396e+06	4.48833e+06	5.51838e+06	5.37939e+06	5.09768e+06	4.50591e+06	4.12449e+06	4.71923e+06	4.94692e+06	4.77506e+06	5.74234e+06	3.50811e+06	3.70851e+06	3.52802e+06	4.66465e+06	3.17907e+06
M266T83	Thiamine	266.125	83.3	265.112	20.0056	C12H17N4OS	[M+H]+	Diazines	Pyrimidines and pyrimidine derivatives	C00378	Metabolism of cofactors and vitamins; Membrane transport; Digestive system; Folding, sorting and degradation; Global and overview maps	59-43-8	HMDB0000235	mzCloud	2	pos	1.44718e+06	1.20441e+06	1.33467e+06	1.35127e+06	760203	885632	991335	1.05125e+06	2.00331e+06	1.97316e+06	1.89198e+06	1.61944e+06	281903	376911	311581	251704	5.89441e+06	5.812e+06	4.89481e+06	6.18997e+06	2.99283e+06	2.73578e+06	3.12733e+06	2.89872e+06
M284T407	Promethazine	284.128	406.9	284.135	24.9888	C17H20N2S	[M]+	Benzothiazines	Phenothiazines	C07404		60-87-7	HMDB0015202	BioDeepDB	2	pos	94956	9626.19	72243.5	68402.9	103302	125489	135934	43573.7	92994.2	104833	124810	65280.2	106906	90117.7	110174	83540.3	104345	45286.2	73370	90681.4	82918	67902.5	38127.9	70342.1
M268T72	Adenosine	268.104	72.3	267.097	1.49196	C10H13N5O4	[M+H]+	Purine nucleosides		C00212	Circulatory system; Membrane transport; Signal transduction; Endocrine system; Neurodegenerative disease; Signaling molecules and interaction; Nucleotide metabolism; Substance dependence; Global and overview maps	58-61-7	HMDB0000050	BioDeepDB	2	pos	785256	760136	775171	523362	637679	246144	3.12162e+06	288412	678045	3.37822e+06	4.22897e+06	690263	3.5233e+06	735258	639465	340374	5.45906e+06	4.12026e+06	4.95206e+06	1.84127e+06	4.9192e+06	4.73465e+06	494970	3.02899e+06
M279T416	Sulfamethazine	279.094	415.8	278.084	10.0325	C12H14N4O2S	[M+H]+	Benzene and substituted derivatives	Benzenesulfonamides	C19530		57-68-1	HMDB0015522	BioDeepDB	2	pos	450612	261299	398897	568969	555489	461716	371297	450092	461661	320056	575307	385542	404601	437902	455673	267173	436751	285701	328474	381938	287039	382975	284295	569228
M279T546	13S-hydroxyoctadecadienoic acid	279.234	545.8	296.235	5.01372	C18H32O3	[M+H-H2O]+	Fatty Acyls	Lineolic acids and derivatives	C14762	Lipid metabolism; Endocrine system	5204-88-6/29623-28-7	HMDB0004667	BioDeepDB	2	pos	1.62361e+07	2.03409e+06	2.00696e+06	1.46472e+07	1.9804e+06	2.0512e+06	6.99902e+06	7.42799e+06	1.0251e+07	8.54201e+06	6.80484e+06	7.38576e+06	9.27323e+06	5.89658e+06	1.19466e+07	6.83138e+06	4.15225e+06	1.84026e+07	1.1999e+07	1.3457e+07	5.76604e+06	1.9834e+06	2.44349e+06	1.8229e+07
M279T516	Alpha-dimorphecolic acid	279.234	515.7	296.235	5.01372	C18H32O3	[M+H-H2O]+	Fatty Acyls	Lineolic acids and derivatives	C14767	Lipid metabolism; Endocrine system	73543-67-6	HMDB0004670	BioDeepDB	2	pos	8.42985e+06	8.05656e+06	3.63762e+06	4.39e+06	6.04266e+06	6.39502e+06	6.27268e+06	6.10125e+06	6.50259e+06	5.63242e+06	7.60157e+06	5.79086e+06	5.665e+06	5.45084e+06	7.08512e+06	5.33701e+06	5.82444e+06	5.42699e+06	5.15361e+06	5.12556e+06	4.98058e+06	7.49403e+06	4.93716e+06	4.75302e+06
M282T621	Oleamide	282.279	620.7	281.272	1.1478	C18H35NO	[M+H]+	Fatty Acyls	Fatty amides	C19670		301-02-0	HMDB0002117	BioDeepDB	2	pos	6.74034e+08	5.89128e+08	1.14383e+09	1.57171e+09	2.07639e+09	3.73501e+08	7.74144e+07	1.4197e+09	6.59176e+08	2.95273e+09	1.51519e+09	8.09892e+08	1.59714e+09	1.16697e+09	5.65692e+08	1.72323e+09	1.67463e+09	3.8719e+08	6.85092e+08	2.63465e+08	3.10811e+08	1.25803e+08	3.40325e+07	1.12608e+08
M282T524	Sphingosine	282.279	524.1	299.282	16.0621	C18H37NO2	[M+H-H2O]+	Organonitrogen compounds	Amines	C00319	Lipid metabolism; Cell growth and death; Signal transduction; Global and overview maps	123-78-4	HMDB0000252	BioDeepDB	2	pos	1.80018e+07	4.57459e+06	2.41941e+07	1.52386e+07	2.80442e+07	2.29577e+07	1.77196e+07	1.67133e+07	1.9683e+07	2.6473e+07	2.45256e+07	2.64623e+07	2.17735e+07	1.99899e+07	3.11081e+07	1.10905e+07	1.89455e+07	3.30929e+07	3.27998e+07	1.44376e+07	2.38038e+07	2.05713e+07	1.76091e+07	2.75245e+06
M283T555	Oleic acid	283.263	554.8	282.256	0.97436	C18H34O2	[M+H]+	Fatty Acyls	Fatty acids and conjugates	C00712	Lipid metabolism; Chemical structure transformation maps; Aging	112-80-1	HMDB0000207	BioDeepDB	2	pos	6.04143e+06	6.09144e+06	7.10455e+06	1.2772e+07	7.29593e+06	7.11177e+06	6.86722e+06	1.27312e+07	7.77693e+06	4.51676e+06	9.25938e+06	8.88186e+06	5.39518e+06	4.66022e+06	8.80353e+06	6.93352e+06	7.70526e+06	1.42447e+07	1.63625e+07	9.57171e+06	8.19147e+06	2.78826e+06	7.58904e+06	6.14738e+06
M295T529	9(S)-HPODE	295.227	529.1	312.23	0	C18H32O4	[M+H-H2O]+	Fatty Acyls	Lineolic acids and derivatives	C14827	Lipid metabolism; Global and overview maps	29774-12-7	HMDB0006940	BioDeepDB	2	pos	5.50196e+06	6.62258e+06	8.09461e+06	6.6608e+06	9.04876e+06	1.03453e+07	7.90408e+06	8.68485e+06	1.03444e+07	8.97983e+06	1.3626e+07	1.03148e+07	1.28973e+07	1.21671e+07	1.3639e+07	1.01999e+07	7.49238e+06	1.03998e+07	9.35555e+06	8.99954e+06	5.57479e+06	7.40162e+06	4.27255e+06	2.81442e+07
M300T590	Palmitoylethanolamide	300.29	589.6	299.282	0.253089	C18H37NO2	[M+H]+	Carboximidic acids and derivatives	Carboximidic acids	C16512	Signaling molecules and interaction	544-31-0	HMDB0002100	BioDeepDB	2	pos	1.34466e+07	1.64262e+07	1.00192e+07	1.67889e+07	1.33118e+07	1.29227e+07	1.4437e+07	1.05519e+07	9.33222e+06	8.61054e+06	1.25567e+07	1.1971e+07	8.49297e+06	1.43745e+07	1.19984e+07	1.27103e+07	1.0203e+07	1.31371e+07	1.52884e+07	1.44025e+07	1.10752e+07	1.26584e+07	1.21021e+07	7.52639e+06
M301T545	12-KETE	301.217	545.1	318.219	16.3802	C20H30O3	[M+H-H2O]+	Fatty Acyls	Fatty acids and conjugates	C14807	Lipid metabolism	108437-64-5	HMDB0013633	BioDeepDB	2	pos	810975	3.89101e+06	4.07108e+06	4.75365e+06	3.30519e+06	703722	3.26869e+06	2.11323e+06	2.67244e+06	2.39417e+06	3.66539e+06	2.5158e+06	2.68867e+06	3.6166e+06	3.46206e+06	551124	3.67676e+06	4.00038e+06	3.83684e+06	2.83602e+06	3.12338e+06	3.76905e+06	2.62408e+06	1.55847e+06
M297T552	9,10-DHOME	297.242	551.9	314.246	0.0482386	C18H34O4	[M+H-H2O]+	Fatty Acyls	Fatty acids and conjugates	C14828	Lipid metabolism	263399-34-4	HMDB0004704	BioDeepDB	2	pos	1.21111e+07	1.23327e+07	2.67589e+07	2.51959e+07	2.12417e+07	1.57858e+07	3.05784e+07	2.07027e+07	2.41592e+07	1.86347e+07	2.69888e+07	2.37792e+07	2.74292e+07	1.92946e+07	5.98919e+07	2.27469e+07	2.50489e+07	4.05122e+07	4.11198e+07	4.95592e+07	5.31435e+07	5.51248e+07	1.06322e+07	1.05072e+07
M380T454	Sphingosine 1-phosphate	380.255	454.3	379.249	1.31491	C18H38NO5P	[M+H]+	Sphingolipids	Phosphosphingolipids	C06124	Signal transduction; Lipid metabolism; Signaling molecules and interaction; Infectious disease: bacterial; Immune system; Global and overview maps	26993-30-6	HMDB0000277	BioDeepDB	2	pos	3.16833e+06	3.2465e+06	3.11804e+06	2.48593e+06	3.2733e+06	3.00481e+06	3.33641e+06	3.97625e+06	3.86016e+06	3.72707e+06	3.92202e+06	3.38985e+06	2.93355e+06	2.59187e+06	2.96063e+06	1.96162e+06	3.7468e+06	3.71401e+06	3.42146e+06	3.29322e+06	2.7027e+06	4.51893e+06	3.40003e+06	3.69797e+06
M379T632	Ergocalciferol	379.336	631.7	396.339	10.6344	C28H44O	[M+H-H2O]+	Steroids and steroid derivatives	Vitamin D and derivatives	C05441	Lipid metabolism; Global and overview maps	50-14-6	HMDB0000900	BioDeepDB	2	pos	5.61605e+07	5.37169e+07	8.35276e+07	5.04296e+07	8.75654e+07	8.91464e+07	1.21306e+07	7.70992e+07	6.30088e+07	4.39769e+07	5.86622e+07	5.4725e+07	5.59707e+07	5.10559e+07	4.38179e+07	4.92556e+07	4.28258e+07	5.98846e+07	5.84857e+07	5.41329e+07	5.3258e+07	4.97676e+07	4.43651e+07	3.66769e+06
M384T656	Vitamin D3	384.348	655.8	384.339	22.3756	C27H44O	[M]+	Steroids and steroid derivatives	Vitamin D and derivatives	C05443	Lipid metabolism; Immune disease; Global and overview maps; Digestive system	67-97-0	HMDB0000876	BioDeepDB	2	pos	4.58453e+07	5.27646e+07	4.37106e+07	4.29252e+07	5.04298e+07	3.67262e+07	3.52556e+07	6.36451e+07	5.56358e+07	5.37488e+07	3.26761e+07	4.95818e+07	7.51504e+07	5.84491e+07	8.60322e+07	6.75277e+07	7.5535e+07	9.34618e+07	8.30583e+07	6.27635e+07	5.98918e+07	1.13874e+08	8.7206e+06	1.47509e+07
M410T622	Gamma-Tocotrienol	410.321	621.7	410.318	5.84908	C28H42O2	[M]+	Prenol lipids	Quinone and hydroquinone lipids	C14155	Metabolism of cofactors and vitamins; Global and overview maps	14101-61-2	HMDB0012958	BioDeepDB	2	pos	1.18897e+07	1.6112e+07	1.67926e+07	2.04555e+07	5.53369e+07	3.39414e+07	2.12744e+08	6.03789e+07	9.56033e+06	1.21179e+07	1.26302e+07	5.77012e+06	1.30425e+07	1.11552e+07	4.01027e+07	2.56384e+07	9.1445e+06	8.03249e+06	4.84808e+06	1.28644e+07	7.97014e+06	3.41914e+07	7.23417e+06	7.57657e+06
M413T629	alpha-Spinasterol	413.367	628.6	412.37	27.0365	C29H48O	[M+H]+	Steroids and steroid derivatives	Stigmastanes and derivatives	C08840		481-18-5	HMDB0033873	BioDeepDB	2	pos	3.05152e+07	2.82984e+07	2.29962e+07	3.4945e+07	4.07423e+07	2.94271e+07	3.62634e+07	3.42026e+07	3.19873e+07	5.0001e+07	3.13597e+07	2.77088e+07	5.20687e+07	2.29936e+07	2.61118e+07	1.94786e+07	2.72721e+07	3.18361e+07	4.79999e+07	4.02835e+07	1.42471e+07	8.69219e+06	2.55309e+07	2.09757e+07
M425T631	Betulin	425.377	631.3	442.381	2.58594	C30H50O2	[M+H-H2O]+	Prenol lipids	Triterpenoids	C08618		473-98-3	HMDB0036838	BioDeepDB	2	pos	1.07108e+07	1.77905e+07	8.82224e+06	1.35284e+07	1.71351e+07	1.45384e+07	8.98721e+06	1.03258e+07	2.46373e+07	1.82269e+07	8.78785e+06	1.62505e+07	8.6779e+06	4.6457e+06	7.21031e+06	1.28722e+07	1.76618e+07	1.85859e+07	7.59726e+06	1.9994e+07	9.14363e+06	1.70242e+07	8.18046e+06	9.44362e+06
M496T510	1-palmitoylglycerophosphocholine	496.339	510	496.34	2.4177	C24H51NO7P	[M+H]+	Glycerophospholipids	Glycerophosphocholines	C04102		17364-16-8	HMDB0062541	BioDeepDB	2	pos	3.61439e+06	3.43402e+06	5.07379e+06	5.11468e+06	5.45353e+06	3.73132e+06	4.81381e+06	3.38895e+06	3.45777e+06	2.82916e+06	1.79483e+06	3.27399e+06	2.36274e+06	2.87209e+06	5.70016e+06	3.64379e+06	3.57968e+06	5.72503e+06	4.36851e+06	5.08655e+06	3.467e+06	2.43335e+06	3.17896e+06	2.98798e+06
M568T592_1	Lutein	568.424	591.8	568.428	7.38885	C40H56O2	[M]+	Prenol lipids	Tetraterpenoids	C08601	Chemical structure transformation maps; Global and overview maps; Metabolism of terpenoids and polyketides	127-40-2	HMDB0003233	BioDeepDB	2	pos	5.87311e+07	4.12748e+07	3.70191e+07	3.55474e+07	3.8182e+07	4.73564e+07	2.51483e+07	2.20698e+07	1.88542e+07	3.39529e+07	1.90076e+07	3.15349e+07	1.77045e+07	2.33018e+07	4.08344e+07	5.77115e+07	5.91945e+07	4.32793e+07	5.322e+07	1.98124e+07	1.94226e+07	4.07858e+07	1.35692e+07	8.35744e+07
M253T420	10,11-Dihydroxycarbamazepine	253.087	420.1	270.1	23.9681	C15H14N2O3	[M+H-H2O]+	Benzazepines	Dibenzazepines	C07495	Xenobiotics biodegradation and metabolism	35079-97-1	HMDB0060568	MoNA	2	pos	725631	1.94352e+06	4.55878e+06	2.89504e+06	3.85993e+06	2.10374e+06	1.98729e+06	1.55476e+06	820379	1.96723e+06	2.0171e+06	2.16179e+06	1.3828e+06	1.82601e+06	5.78175e+06	2.25391e+06	1.58107e+06	3.42812e+06	1.83628e+06	4.44802e+06	1.56372e+07	6.27403e+06	1.21796e+06	1.46407e+06
M279T550	Dibutyl phthalate	279.16	550.4	278.152	2.20238	C16H22O4	[M+H]+	Benzene and substituted derivatives	Benzoic acids and derivatives	C14214		84-74-2	HMDB0033244	MoNA	2	pos	1.29966e+08	1.37926e+08	1.6542e+08	1.15932e+08	1.43684e+08	1.80183e+08	1.47401e+08	1.35594e+08	1.3955e+08	1.86298e+08	1.3776e+08	1.33975e+08	9.63722e+07	1.18144e+08	1.22391e+08	1.63472e+08	7.43548e+07	1.3259e+08	1.90209e+08	1.42158e+08	1.46725e+08	1.38251e+08	1.30173e+08	1.34106e+08
M126T40	Taurine	125.986	40.2	125.015	0.75217	C2H7NO3S	[M+H]+	Organic sulfonic acids and derivatives	Organosulfonic acids and derivatives	C00245	Membrane transport; Metabolism of other amino acids; Lipid metabolism; Signaling molecules and interaction; Energy metabolism; Global and overview maps	107-35-7	HMDB0000251	BioDeepDB	2	pos	8.95779e+07	3.55424e+08	3.30385e+08	9.06026e+07	3.61748e+08	7.77146e+07	3.96803e+07	2.105e+08	4.11274e+08	9.38564e+07	4.50476e+08	4.14734e+08	3.23573e+08	2.0931e+08	5.23133e+08	1.15745e+08	8.57055e+07	1.94323e+08	1.67897e+08	8.00057e+07	3.7037e+08	7.45145e+07	1.00677e+07	5.1821e+07
M439T498	Betulinic acid	439.355	498.1	456.36	5.08473	C30H48O3	[M+H-H2O]+	Prenol lipids	Triterpenoids	C08619		472-15-1	HMDB0030094	GNPS	2	pos	5.4656e+07	1.11942e+06	1.33268e+07	6.38334e+06	40431.3	2.41839e+06	423007	9.92574e+06	29262.5	25999.5	65250.8	118056	1.88798e+07	58404.9	49004.2	25840.7	6.8287e+08	1.4606e+08	2.76228e+08	9.43118e+07	1.78726e+07	2.04868e+07	2.24729e+07	6.75782e+06
M124T404	L-Histidinol	124.086	403.7	141.09	28.4802	C6H11N3O	[M+H-H2O]+	Organonitrogen compounds	Amines	C00860	Amino acid metabolism; Global and overview maps	4836-52-6	HMDB0003431	MoNA	2	pos	1.33911e+07	1.50057e+07	1.65094e+07	1.46131e+07	2.18947e+07	2.86491e+07	4.12546e+06	1.27493e+07	2.43627e+07	1.1709e+07	2.85667e+07	1.13819e+07	1.17208e+07	1.52708e+07	1.48395e+07	1.74369e+07	1.22575e+07	4.23813e+07	3.304e+07	1.46654e+07	1.91633e+07	2.34325e+07	1.19117e+07	1.98398e+07
M177T448	trans-Ferulic acid	177.055	448	194.058	26.1726	C10H10O4	[M+H-H2O]+	Cinnamic acids and derivatives	Hydroxycinnamic acids and derivatives	C01494	Chemical structure transformation maps; Biosynthesis of other secondary metabolites; Global and overview maps	537-98-4/1135-24-6	HMDB0000954	MoNA	2	pos	4.40062e+06	1.50317e+06	6.8941e+06	4.40846e+06	3.3885e+06	1.04299e+07	5.17126e+06	3.16006e+06	4.55293e+06	4.32631e+06	4.19645e+06	3.8476e+06	1.82809e+06	5.14179e+06	6.78674e+06	4.43527e+06	5.2248e+06	5.40568e+06	2.7294e+06	1.91008e+06	5.90446e+06	4.08307e+06	2.9844e+06	4.27228e+06
M315T615	Tetrahydrocannabinol	315.232	614.8	314.225	0.812736	C21H30O2	[M+H]+	Benzopyrans	1-benzopyrans	C06972	Biosynthesis of other secondary metabolites; Global and overview maps	1972-08-3	HMDB0014613	MoNA	2	pos	2.52272e+06	830870	3.9802e+06	4.76584e+06	2.504e+06	5.33157e+06	7.98322e+06	4.76156e+06	5.63345e+06	9.21493e+06	2.87327e+07	1.35121e+07	3.04844e+06	1.47693e+06	1.45874e+06	285106	1.50139e+07	9.01587e+06	4.01305e+06	5.20663e+06	4.21884e+06	2.83613e+06	3.03763e+06	5.70193e+06
M139T391	Isophorone	139.112	391.4	138.105	1.61021	C9H14O	[M+H]+	Carbonyl compounds	Ketones	C14743		78-59-1	HMDB0031195	mzCloud	2	pos	5.7924e+06	1.25155e+06	5.36962e+06	5.56937e+06	1.48224e+06	1.30107e+06	2.08756e+06	1.39548e+06	1.55098e+06	2.27324e+06	1.40198e+06	6.19014e+06	6.28041e+06	1.81609e+06	2.61033e+06	5.97994e+06	3.61315e+06	1.6917e+06	1.51763e+06	5.04765e+06	1.6374e+06	2.60598e+06	3.505e+06	5.31294e+06
M183T473	Benzophenone	183.081	472.6	182.073	0.677297	C13H10O	[M+H]+	Benzene and substituted derivatives	Benzophenones	C06354		119-61-9	HMDB0032049	mzCloud	2	pos	8.08177e+06	8.78624e+06	7.73118e+06	1.06416e+07	7.88337e+06	8.45588e+06	7.62935e+06	8.91186e+06	9.61922e+06	8.16058e+06	9.41507e+06	8.70374e+06	8.14273e+06	8.42456e+06	7.79257e+06	9.00058e+06	7.95699e+06	8.33278e+06	8.32045e+06	7.96109e+06	7.5076e+06	6.9606e+06	5.39671e+06	5.62807e+06
M193T485	(-)-Jasmonic acid	193.123	485.2	210.126	25.0307	C12H18O3	[M+H-H2O]+	Fatty Acyls	Lineolic acids and derivatives	C08491	Lipid metabolism; Signal transduction; Chemical structure transformation maps; Global and overview maps	c("6894-38-8", "59366-47-1")	HMDB0032797	mzCloud	2	pos	7.06509e+06	6.53351e+06	1.04607e+07	7.49533e+06	8.74254e+06	5.80808e+06	6.4978e+06	8.33743e+06	4.58204e+06	6.60612e+06	6.0982e+06	7.53798e+06	6.16689e+06	6.65114e+06	7.55993e+06	6.288e+06	4.73085e+06	7.41268e+06	5.49399e+06	9.79912e+06	2.51671e+07	1.25605e+07	5.50832e+06	6.91571e+06
M219T525	Nootkatone	219.175	524.7	218.167	2.84704	C15H22O	[M+H]+	Prenol lipids	Sesquiterpenoids	C17914		4674-50-4	HMDB0013687	mzCloud	2	pos	1.6204e+07	2.09618e+07	2.79663e+07	1.14109e+07	1.15803e+07	1.11076e+07	1.37878e+07	9.32032e+06	1.81138e+07	1.76446e+07	4.80809e+06	1.99291e+07	7.38266e+06	4.7218e+06	1.47577e+07	1.67171e+07	5.26468e+06	1.66096e+07	1.29633e+07	1.08194e+07	1.57712e+07	1.65542e+07	3.77567e+06	1.85017e+07
M251T517	OPEO	251.201	517.4	250.193	3.35954	C16H26O2	[M+H]+	Extractables/Leachables; Textile Chemicals/Auxiliary/Dyes		D05229				mzCloud	2	pos	1.94192e+06	755296	428740	3.24151e+06	448594	1.17735e+06	1.0234e+06	361049	833655	630522	642458	943257	970170	612456	619758	1.03546e+06	1.56014e+06	527796	1.31612e+06	1.26516e+06	603793	456117	8.34219e+06	362449
M250T411	Alprenolol	250.178	411.3	249.173	8.2141	C15H23NO2	[M+H]+	Therapeutics/Prescription Drugs		D07156				mzCloud	2	pos	5.51554e+07	5.76905e+07	7.83852e+07	5.17423e+07	5.77665e+07	3.73024e+07	5.2564e+07	4.49804e+07	5.66349e+07	4.0623e+07	1.19773e+07	3.95242e+07	5.90957e+07	3.85595e+07	4.29866e+07	4.75262e+07	5.60004e+07	5.97814e+07	5.60762e+07	5.25119e+07	4.77493e+07	6.81818e+07	5.3232e+07	3.92847e+07
M279T523	(9Z,11E,13E)-Octadecatrienoic acid	279.232	523	278.225	1.87657	C18H30O2	[M+H]+			C08315		506-23-0		mzCloud	2	pos	5.8919e+06	5.58918e+06	5.76981e+06	5.74556e+06	5.83959e+06	5.46011e+06	5.61736e+06	6.3388e+06	5.97563e+06	5.77612e+06	5.643e+06	5.24171e+06	5.89354e+06	5.42264e+06	5.81345e+06	5.81531e+06	5.87072e+06	5.70215e+06	5.72675e+06	5.49437e+06	5.60792e+06	5.86734e+06	5.8466e+06	6.06131e+06
M298T649	Tridemorph	298.311	649.1	297.303	0.415674	C19H39NO	[M+H]+	Oxazinanes	Morpholines	C11285		c("24602-86-6", "81412-43-3", "NA")	HMDB0031810	mzCloud	2	pos	1.69389e+07	9.62926e+06	1.79046e+07	1.57174e+07	1.3059e+07	9.39512e+06	1.07437e+06	1.13409e+07	9.15108e+06	7.46545e+06	2.73302e+06	6.23361e+06	1.09009e+07	6.74992e+06	8.05402e+06	1.49882e+07	8.97706e+06	1.15243e+07	9.32104e+06	1.2633e+07	1.02291e+07	1.34252e+07	685791	1.02282e+06
M303T530	Abietate	303.232	530.4	302.225	1.72805	C20H30O2	[M+H]+	Extractables/Leachables		C06087	Global and overview maps; Metabolism of terpenoids and polyketides	514-10-3		mzCloud	2	pos	1.40243e+06	8.13197e+07	188331	155519	151457	192312	125536	645637	3.48288e+06	2.2396e+06	3.37135e+06	1.07013e+06	505179	874474	1.0703e+06	109044	643258	152234	125745	936301	80931.3	73865.1	78592.5	89284.8
M326T601	Oleoylethanolamide	326.306	601.2	325.298	1.91232	C20H39NO2	[M+H]+	Organonitrogen compounds	Amines	C20792	Signal transduction	111-58-0	HMDB0002088	mzCloud	2	pos	2.54856e+06	3.29572e+06	2.07805e+06	2.01283e+06	2.34956e+06	2.1627e+06	1.83795e+06	1.81304e+06	2.05462e+06	1.83354e+06	2.0641e+06	2.57284e+06	1.55745e+06	2.16309e+06	1.79089e+06	2.07434e+06	3.122e+06	2.34819e+06	2.80244e+06	2.52434e+06	2.16473e+06	1.7414e+06	1.12542e+06	1.63162e+06
M310T537	N,N-Dimethylsphing-4-enine	310.311	537.1	327.314	14.9334	C20H41NO2	[M+H-H2O]+	Organonitrogen compounds	Amines	C13914		c("122314-67-4", "119567-63-4")	HMDB0013645	mzCloud	2	pos	3.54028e+08	2.08955e+08	4.89211e+08	1.16026e+08	6.51378e+07	2.43481e+08	8.4622e+06	3.69578e+08	1.84616e+08	1.06413e+08	2.20829e+08	4.52059e+07	6.01182e+07	1.37263e+08	2.07134e+08	5.37234e+07	2.34447e+08	2.87639e+08	1.03583e+08	2.52751e+08	2.40114e+08	6.09519e+07	7.51993e+07	7.92369e+07
M318T404	Phytosphingosine	318.302	404	317.293	6.6729	C18H39NO3	[M+H]+	Organonitrogen compounds	Amines	C12144	Lipid metabolism; Global and overview maps	554-62-1	HMDB0004610	mzCloud	2	pos	5.4524e+07	4.52135e+07	4.4639e+07	5.48612e+07	3.52652e+07	4.59706e+07	1.17433e+08	5.56864e+07	1.33349e+08	6.96514e+07	4.74052e+07	6.45905e+07	1.40278e+08	5.13782e+07	7.6045e+07	6.14255e+07	5.17642e+07	6.073e+07	8.56095e+07	7.81712e+07	8.25206e+07	9.29882e+07	5.24293e+07	6.07113e+07
M327T513_1	Triphenyl phosphate	327.079	512.6	326.071	1.60206	C18H15O4P	[M+H]+	Extractables/Leachables; Industrial Chemicals		C14235		115-86-6		mzCloud	2	pos	1.0477e+06	1.79055e+06	1.25035e+06	1.36454e+06	1.89929e+06	1.48358e+06	1.21251e+06	1.31343e+06	1.39823e+06	850384	1.27871e+06	1.57698e+06	1.88679e+06	1.47133e+06	1.08439e+06	1.21167e+06	1.71557e+06	845224	1.27354e+06	1.22088e+06	1.16329e+06	1.16173e+06	1.11756e+06	1.45771e+06
M337T385	4-Chloro-17alpha-methyl-17beta-hydroxy-4-androsten-3-one	337.199	384.6	336.186	17.5683	C20H29ClO2	[M+H]+	Drugs of Abuse/Illegal Drugs; Sports Doping Drugs		C15358				mzCloud	2	pos	1.10756e+06	1.83599e+06	1.22631e+06	1.00313e+06	1.28915e+06	1.65028e+06	1.03752e+06	1.12349e+06	1.22949e+06	716826	356640	1.03245e+06	1.64593e+06	1.31382e+06	777613	1.48057e+06	1.22019e+06	941176	1.41292e+06	1.20028e+06	1.11649e+06	1.12299e+06	838997	1.17053e+06
M399T537	Tris(butoxyethyl)phosphate	399.251	536.8	398.243	1.31246	C18H39O7P	[M+H]+	Extractables/Leachables; Textile Chemicals/Auxiliary/Dyes; Industrial Chemicals		C14446		78-51-3		mzCloud	2	pos	4.05672e+06	1.3106e+07	2.40288e+07	3.79829e+06	9.28945e+06	1.2183e+07	2.99717e+06	1.46521e+07	1.58811e+07	4.90433e+06	7.5736e+06	8.97068e+06	1.52501e+07	1.89254e+06	1.16619e+07	3.54998e+06	1.20258e+07	1.56335e+07	1.18934e+07	1.11708e+07	1.20849e+07	1.38936e+07	1.07755e+07	1.07352e+07
M457T621	Oleanolic acid	457.367	620.9	456.36	1.04074	C30H48O3	[M+H]+	Prenol lipids	Triterpenoids	C17148		508-02-1	HMDB0002364	mzCloud	2	pos	2.73624e+06	424022	6.02566e+07	1.36154e+06	3.19675e+06	3.25432e+06	221839	1.63431e+06	2.26603e+06	1.38199e+06	2.04342e+06	620786	2.07317e+06	600874	1.68042e+06	512100	9.45463e+07	1.35828e+08	8.14653e+07	7.94075e+07	1.36147e+07	1.56648e+07	1.08494e+07	2.62128e+07
M453T556	Glycyrrhetinate	453.336	556.3	470.34	7.35438	C30H46O4	[M+H-H2O]+	Prenol lipids	Triterpenoids	C02283		c("1449-05-4", "471-53-4")	HMDB0011628	mzCloud	2	pos	2.39944e+07	1.17714e+07	1.57944e+07	5.0831e+06	1.27965e+07	1.1025e+07	8.69669e+06	1.16515e+07	6.31351e+06	6.03865e+06	4.47181e+06	4.34946e+06	1.74489e+06	1.23503e+06	1.39714e+06	1.1692e+06	5.27116e+06	9.3387e+06	1.06928e+07	1.41272e+07	7.912e+06	8.50291e+06	1.13021e+07	4.79739e+06
M487T48_1	Raffinose	487.164	48.1	504.169	5.4068	C18H32O16	[M+H-H2O]+	Organooxygen compounds	Carbohydrates and carbohydrate conjugates	C00492	Carbohydrate metabolism; Membrane transport; Global and overview maps	512-69-6	HMDB0003213	mzCloud	2	pos	1.32077e+06	1.03095e+06	3.22939e+06	2.1816e+06	3.11081e+06	4.29118e+06	2.64736e+06	648649	3.08074e+06	1.99476e+06	2.35215e+06	2.28945e+06	3.68942e+06	4.90426e+06	6.51805e+06	3.03754e+06	1.99317e+06	9.50419e+06	3.25817e+06	5.78768e+06	1.60841e+07	9.52165e+06	4.78061e+06	4.83056e+06
M489T439	Asiatic acid	489.357	439	488.35	1.38141	C30H48O5	[M+H]+			C08617		464-92-6		mzCloud	2	pos	620393	358036	466218	4.57528e+06	1.81793e+06	715777	2.45769e+06	2.18862e+06	2.70404e+06	2.73135e+06	2.97495e+06	3.05216e+06	2.3302e+06	1.90062e+06	2.17834e+06	1.56644e+06	2.91383e+06	2.10949e+06	2.68411e+06	1.92167e+06	709587	3.2422e+06	561519	3.58457e+06
M102T297_1	(S)-Methylmalonic acid semialdehyde	102.034	297.1	102.032	0.0855655	C4H6O3	[M]+	Organooxygen compounds	Carbonyl compounds	C06002	Carbohydrate metabolism; Amino acid metabolism; Xenobiotics biodegradation and metabolism; Global and overview maps	99043-16-0	HMDB0002217	BioDeepDB	2	pos	2.8472e+06	2.28244e+07	2.74595e+06	2.70629e+06	1.05116e+07	1.12393e+07	2.77792e+06	9.57367e+06	2.78301e+06	2.80097e+06	2.8425e+06	2.7885e+06	2.98361e+06	1.62406e+07	2.12413e+07	1.62216e+06	1.8051e+07	3.02155e+06	3.04469e+06	3.1813e+06	2.98423e+06	9.16545e+06	2.98244e+06	2.99991e+06
M102T226	5-Aminopentanal	102.091	226.3	101.084	3.68299	C5H11NO	[M+H]+	Organooxygen compounds	Carbonyl compounds	C12455	Amino acid metabolism; Biosynthesis of other secondary metabolites; Global and overview maps		HMDB0012815	BioDeepDB	2	pos	2.7498e+06	1.89812e+06	1.536e+06	2.16467e+06	2.64089e+06	2.15975e+06	1.65102e+06	1.84453e+07	8.24943e+06	1.17102e+06	1.57494e+06	3.39174e+07	4.61699e+06	6.89881e+06	5.00516e+06	1.99577e+07	6.5947e+06	8.76042e+06	1.05517e+07	5.14961e+06	1.59769e+07	4.24461e+06	1.37485e+07	1.94432e+06
M107T411	Benzaldehyde	107.049	411.1	106.042	0.000391417	C7H6O	[M+H]+	Benzene and substituted derivatives	Benzoyl derivatives	C00261	Xenobiotics biodegradation and metabolism; Global and overview maps	100-52-7	HMDB0006115	BioDeepDB	2	pos	917924	815581	971635	942676	972082	890631	843802	957392	882770	1.01734e+06	921372	921156	946980	887893	843385	829924	916490	832879	779722	894574	903083	880734	924027	994016
M114T210	Epsilon-caprolactam	114.091	210.1	113.084	1.97148	C6H11NO	[M+H]+	Lactams	Caprolactams	C06593	Xenobiotics biodegradation and metabolism; Global and overview maps	105-60-2	HMDB0062769	BioDeepDB	2	pos	3.32999e+07	2.75728e+07	3.00035e+07	2.9657e+07	1.91787e+07	2.01982e+07	1.83471e+07	1.69779e+07	1.87351e+07	1.9313e+07	1.84794e+07	3.13827e+07	1.862e+07	3.13089e+07	1.88203e+07	1.7788e+07	1.16541e+07	1.76808e+07	1.46915e+07	1.49067e+07	1.55073e+07	1.73346e+07	1.69272e+07	1.91155e+07
M119T464_1	Aminomalonic acid	119.015	463.6	119.022	12.6282	C3H5NO4	[M]+	Carboxylic acids and derivatives	Amino acids, peptides, and analogues	C00872		1068-84-4	HMDB0001147	BioDeepDB	2	pos	4.74397e+06	4.39503e+06	4.59371e+06	4.90314e+06	1.44861e+07	4.16033e+06	1.85056e+07	9.53691e+06	4.46303e+06	1.22045e+07	1.85609e+07	1.36595e+06	3.85539e+06	6.74452e+06	8.73487e+06	1.39555e+07	1.39486e+07	2.22907e+07	1.03406e+07	3.39179e+06	1.23314e+07	8.81668e+06	1.06345e+07	8.93713e+06
M119T358	5-Hydroxypentanoic acid	119.07	357.8	118.063	1.88124	C5H10O3	[M+H]+	Fatty Acyls	Fatty acids and conjugates	C02804		13392-69-3	HMDB0061927	BioDeepDB	2	pos	157754	226635	221219	161253	162852	291767	186893	132305	167780	173729	235302	273831	177715	173888	169378	254457	535487	112254	184364	150189	182751	178273	351796	327713
M123T72	Niacinamide	123.056	72.2	122.048	0.0013682	C6H6N2O	[M+H]+	Pyridines and derivatives	Pyridinecarboxylic acids and derivatives	C00153	Metabolism of cofactors and vitamins; Global and overview maps; Aging; Digestive system	98-92-0	HMDB0001406	BioDeepDB	2	pos	1.63289e+07	1.14725e+07	1.55378e+07	1.50129e+07	1.86333e+06	2.1969e+06	2.7581e+06	1.66591e+06	2.43177e+06	2.86104e+06	3.37613e+06	2.24437e+06	12877.8	11746.8	32185.1	1.5487e+06	8.06835e+06	9.2184e+06	7.90828e+06	8.536e+06	4.06994e+06	4.38771e+06	3.57968e+06	3.61715e+06
M127T48	Triacetate lactone	127.039	48.3	126.032	0.00731532	C6H6O3	[M+H]+			C02752		675-10-5		BioDeepDB	2	pos	3.05317e+07	2.62999e+07	2.90985e+07	3.21622e+07	6.94556e+06	7.21918e+06	8.23672e+06	6.43005e+06	7.91321e+06	8.73651e+06	9.86567e+06	7.28224e+06	1.75829e+06	2.01869e+06	1.33145e+06	6.92805e+06	2.06293e+07	2.28178e+07	2.11544e+07	1.97252e+07	1.11671e+07	1.09926e+07	1.05281e+07	1.03314e+07
M130T40_2	Mesaconate	130.017	40.3	130.027	0.0518262	C5H6O4	[M]+			C01732	Carbohydrate metabolism; Global and overview maps	498-24-8		BioDeepDB	2	pos	1.93e+06	1.68128e+06	1.35697e+06	1.68576e+06	1.00872e+06	1.34969e+06	1.31482e+06	1.08545e+06	1.21127e+06	1.07634e+06	1.35858e+06	1.17329e+06	898676	974143	934704	1.08538e+06	1.23998e+06	1.44855e+06	1.39217e+06	1.27405e+06	1.16135e+06	868137	832437	752295
M132T572	N-Carbamoylputrescine	132.103	572.2	131.106	6.99542	C5H13N3O	[M+H]+	Carboximidic acids and derivatives	Carboximidic acids	C00436	Amino acid metabolism; Global and overview maps	6851-51-0	HMDB0033458	BioDeepDB	2	pos	2.09847e+07	3.75363e+07	2.76677e+07	1.95115e+07	2.44539e+07	1.63797e+07	5.28071e+06	1.91016e+07	2.03623e+07	1.81312e+07	3.78592e+07	1.80784e+07	2.98516e+06	1.41712e+07	2.33688e+07	2.44716e+07	1.279e+07	2.31133e+07	3.02924e+07	1.81807e+07	1.44305e+07	6.84138e+06	2.84592e+06	1.49633e+07
M137T72_1	Hypoxanthine	137.046	72.4	136.038	0.00411309	C5H4N4O	[M+H]+	Imidazopyrimidines	Purines and purine derivatives	C00262	Global and overview maps; Nucleotide metabolism	68-94-0	HMDB0000157	BioDeepDB	2	pos	791305	746977	776267	769638	1.34377e+06	1.30767e+06	1.52619e+06	1.11417e+06	740567	965570	946137	794356	834065	705574	903008	891618	1.36438e+06	1.81541e+06	1.61155e+06	1.57336e+06	1.00784e+06	1.03418e+06	1.1235e+06	1.34361e+06
M140T487	Acetylphosphate	139.988	486.5	139.988	0.681092	C2H5O5P	[M]+	Organic phosphoric acids and derivatives	Phosphate esters	C00227	Carbohydrate metabolism; Energy metabolism; Metabolism of other amino acids; Global and overview maps	590-54-5	HMDB0001494	BioDeepDB	2	pos	1.18383e+07	1.15684e+07	1.03975e+07	1.0338e+07	1.20062e+07	1.24186e+07	1.11554e+07	1.1075e+07	9.73973e+06	1.0995e+07	1.04511e+07	1.10278e+07	1.15421e+07	1.08082e+07	1.05702e+07	7.68829e+06	9.27996e+06	1.00131e+07	9.4957e+06	1.06397e+07	9.83478e+06	9.27405e+06	9.49996e+06	9.88938e+06
M140T412	4-Amino-5-hydroxymethyl-2-methylpyrimidine	140.082	412.2	139.075	3.02679	C6H9N3O	[M+H]+			C01279	Metabolism of cofactors and vitamins; Global and overview maps; Membrane transport	73-67-6		BioDeepDB	2	pos	935369	4.96425e+06	2.21322e+06	4.21959e+06	7.01824e+06	1.8435e+06	1.15817e+06	2.30346e+06	2.94587e+06	2.67552e+06	3.47084e+06	4.0947e+06	1.05398e+06	2.12312e+06	2.67531e+06	3.33634e+06	3.21236e+06	1.63883e+06	2.13009e+06	3.37016e+06	3.97241e+06	979053	555520	815586
M146T320	2-Dehydropantoate	146.06	320.4	146.058	0.0338082	C6H10O4	[M]+			C00966	Metabolism of cofactors and vitamins; Global and overview maps	470-30-4		BioDeepDB	2	pos	1.72175e+06	1.61914e+06	1.69815e+06	1.4749e+06	1.85746e+06	1.55767e+06	1.64589e+06	1.60317e+06	1.71997e+06	1.98204e+06	1.7835e+06	1.7381e+06	1.52033e+06	1.16993e+06	1.31267e+06	1.12989e+06	2.18608e+06	2.91105e+06	2.55192e+06	2.67939e+06	1.53761e+06	1.47192e+06	1.56919e+06	1.75143e+06
M154T190	2-Pyrocatechuic acid	154.042	190	154.027	4.78241	C7H6O4	[M]+	Benzene and substituted derivatives	Benzoic acids and derivatives	C00196	Chemical structure transformation maps; Xenobiotics biodegradation and metabolism; Global and overview maps; Metabolism of terpenoids and polyketides	303-38-8	HMDB0000397	BioDeepDB	2	pos	3.28041e+06	3.02842e+06	3.34334e+06	3.06313e+06	3.47794e+06	3.24348e+06	3.71914e+06	3.14644e+06	1.36882e+06	1.49641e+06	1.82944e+06	1.26039e+06	1.41556e+06	1.30546e+06	1.39745e+06	1.36139e+06	4.21374e+06	4.91445e+06	3.82609e+06	4.09147e+06	1.61238e+06	1.53934e+06	1.63401e+06	1.7234e+06
M161T492	N(6)-Methyllysine	161.133	491.7	160.121	1.48207	C7H16N2O2	[M+H]+	Carboxylic acids and derivatives	Amino acids, peptides, and analogues	C02728		1188-07-4 / 7622-29-9	HMDB0002038	BioDeepDB	2	pos	816618	475087	1.0816e+06	694103	2.32197e+06	903415	1.8068e+06	1.82834e+06	636585	647470	612541	564567	578431	581494	701774	793782	337570	638504	1.12609e+06	587230	1.14656e+06	540362	992831	976950
M163T48	3-Hydroxymethylglutaric acid	163.061	48.4	162.053	5.05333	C6H10O5	[M+H]+	Fatty Acyls	Fatty acids and conjugates	C03761		503-49-1	HMDB0000355	BioDeepDB	2	pos	7.5507e+06	6.79585e+06	7.52532e+06	7.9586e+06	7.46324e+06	7.63337e+06	7.5403e+06	7.37269e+06	6.99303e+06	7.07164e+06	9.97785e+06	7.69803e+06	7.21781e+06	7.26985e+06	8.70078e+06	8.30385e+06	7.21166e+06	8.28549e+06	8.02359e+06	7.75749e+06	9.93974e+06	8.68199e+06	7.37716e+06	7.31543e+06
M163T536	Isosafrole	163.076	536.2	162.068	3.83264	C10H10O2	[M+H]+			C10472		120-58-1		BioDeepDB	2	pos	1.94223e+07	1.99635e+07	1.40659e+07	1.26491e+07	5.68328e+06	1.53478e+07	1.23608e+07	6.27961e+06	7.51372e+06	9.47642e+06	9.20838e+06	1.07039e+07	2.22257e+07	1.07965e+07	8.77353e+06	9.12494e+06	1.47883e+07	1.64498e+07	1.44746e+07	1.33391e+07	1.1823e+07	1.11301e+07	1.15753e+07	1.4246e+07
M163T411	2-Deoxystreptamine	163.112	411.1	162.1	2.19594	C6H14N2O3	[M+H]+			C02627	Biosynthesis of other secondary metabolites; Global and overview maps	2037-48-1		BioDeepDB	2	pos	2.13007e+07	8.12284e+06	1.64946e+07	1.55432e+07	1.65928e+07	1.17828e+07	5.9841e+06	6.99502e+06	1.58673e+07	7.15102e+06	1.13263e+07	1.83492e+07	1.59079e+07	1.6162e+07	1.83115e+07	1.47478e+07	8.5194e+06	1.44288e+07	7.15351e+06	1.51195e+07	6.78968e+06	1.70183e+07	7.35639e+06	9.6744e+06
M167T484	3-(2-Hydroxyphenyl)propanoic acid	167.071	484.4	166.063	0.490933	C9H10O3	[M+H]+	Phenylpropanoic acids		C01198	Amino acid metabolism; Xenobiotics biodegradation and metabolism; Global and overview maps	495-78-3	HMDB0033752	BioDeepDB	2	pos	3.11892e+07	7.51993e+06	4.82458e+07	8.10046e+06	3.75544e+07	7.82485e+06	4.80324e+07	4.43063e+07	5.72618e+06	4.03828e+06	2.08676e+07	1.03908e+08	9.19599e+07	1.60647e+07	7.74197e+06	3.86891e+07	2.44479e+07	2.99875e+07	3.88592e+06	4.57434e+07	2.66404e+07	1.48476e+07	1.86869e+07	1.06813e+08
M170T33	Selenocysteine	169.979	32.6	168.964	8.46442	C3H7NO2Se	[M+H]+	Carboxylic acids and derivatives	Amino acids, peptides, and analogues	C05688	Metabolism of other amino acids; Global and overview maps	3614-08-2 / 10236-58-5	HMDB0003288	BioDeepDB	2	pos	1.50183e+07	1.34672e+07	1.84894e+07	1.77004e+07	1.18328e+07	1.25502e+07	1.31933e+07	1.23929e+07	6.3477e+06	7.79225e+06	7.24912e+06	5.8852e+06	4.80577e+06	5.42539e+06	5.16172e+06	5.61607e+06	2.90049e+06	3.32805e+06	2.79522e+06	2.53849e+06	1.68747e+06	1.60648e+06	1.72427e+06	1.3152e+06
M170T559	8-Amino-7-oxononanoate	170.118	559.5	187.121	26.6521	C9H17NO3	[M+H-H2O]+			C01092	Metabolism of cofactors and vitamins; Global and overview maps	4707-58-8		BioDeepDB	2	pos	1.40097e+07	1.36934e+07	7.55635e+06	1.33137e+07	1.21508e+07	1.42351e+07	1.39285e+07	1.36248e+07	1.31119e+07	1.29951e+07	1.32833e+07	1.32237e+07	1.33129e+07	1.12977e+07	1.21342e+07	1.26155e+07	1.1342e+07	1.29543e+07	1.24656e+07	1.24549e+07	1.31491e+07	1.21897e+07	1.18926e+07	1.20244e+07
M172T559	Gabapentin	172.134	559.2	171.126	0.034607	C9H17NO2	[M+H]+			C07018		60142-96-3		BioDeepDB	2	pos	5.56377e+06	5.24879e+06	5.41898e+06	4.67417e+06	1.89701e+06	797999	2.48727e+06	1.46911e+06	3.55374e+06	3.88607e+06	3.33783e+06	4.62874e+06	3.13879e+06	2.72117e+06	5.22353e+06	5.36431e+06	2.07807e+06	2.68807e+06	2.43074e+06	2.88655e+06	4.89164e+06	4.55241e+06	3.75192e+06	6.06874e+06
M173T309	2-Oxoarginine	173.083	309.4	173.08	20.2215	C6H11N3O3	[M]+	Keto acids and derivatives	Short-chain keto acids and derivatives	C03771	Amino acid metabolism; Global and overview maps	3715-10-4	HMDB0004225	BioDeepDB	2	pos	2.18549e+06	1.60074e+06	1.84139e+06	2.01124e+06	1.69526e+06	1.72755e+06	1.56602e+06	1.3896e+06	1.40466e+06	1.67196e+06	1.47745e+06	1.31736e+06	1.56404e+06	1.55301e+06	1.09739e+06	1.52523e+06	1.82792e+06	2.07422e+06	1.94245e+06	1.63545e+06	2.33682e+06	2.12131e+06	2.38823e+06	2.39017e+06
M194T287	3,4-Methylenedioxyamphetamine	194.115	286.8	193.11	1.52722	C11H15NO2	[M+H]+	Benzodioxoles		C07577		4764-17-4 / 42542-10-9	HMDB0041931	BioDeepDB	2	pos	2.31317e+07	1.22178e+07	2.45889e+07	1.45826e+07	1.60508e+07	2.46133e+07	1.66467e+07	1.34389e+07	1.44567e+07	1.39389e+07	1.49297e+07	1.34972e+07	2.25726e+07	1.33172e+07	1.56493e+07	1.61204e+07	1.61517e+07	1.52753e+07	1.62327e+07	1.82784e+07	1.4997e+07	1.51584e+07	1.76884e+07	2.59892e+07
M181T206	Beta-Tyrosine	181.073	205.8	181.074	7.17944	C9H11NO3	[M]+	Carboxylic acids and derivatives	Amino acids, peptides, and analogues	C04368	Amino acid metabolism		HMDB0003831	BioDeepDB	2	pos	1.62863e+06	1.44559e+06	1.60853e+06	1.34044e+06	1.30665e+06	666931	1.47635e+06	1.24135e+06	1.05398e+06	945500	162307	904301	1.26624e+06	768766	968826	1.34692e+06	1.38049e+06	1.36912e+06	1.63088e+06	1.16288e+06	1.04368e+06	2.01579e+06	1.3109e+06	949374
M192T414	N,N-Diethyl-m-toluamide	192.139	414.5	191.131	1.72433	C12H17NO	[M+H]+			C10935		134-62-3		BioDeepDB	2	pos	4.68005e+06	2.64825e+06	3.46717e+06	2.3877e+06	2.83246e+06	4.2375e+06	2.29661e+06	6.07029e+06	2.5366e+06	2.00003e+06	2.40381e+06	2.1874e+06	4.20468e+06	2.0323e+06	2.00963e+06	2.37521e+06	2.22298e+06	2.96577e+06	3.81384e+06	2.80383e+06	2.27817e+06	2.06403e+06	2.26866e+06	3.77555e+06
M193T240	Sinapyl alcohol	193.087	239.8	210.089	0.708954	C11H14O4	[M+H-H2O]+	Phenols	Methoxyphenols	C02325	Chemical structure transformation maps; Biosynthesis of other secondary metabolites; Global and overview maps	537-33-7	HMDB0013070	BioDeepDB	2	pos	121871	123187	118598	127322	116885	112376	114459	112549	117105	114806	115687	115038	111784	110857	102624	108559	1.5626e+06	1.11033e+07	198531	530889	421575	635690	266663	3.54638e+06
M214T265	Baclofen	214.063	265.1	213.056	1.08538	C10H12ClNO2	[M+H]+			C06841		1134-47-0		BioDeepDB	2	pos	3.76285e+06	2.68798e+06	4.66611e+06	2.75373e+06	3.23402e+06	2.79036e+06	3.10555e+06	2.45462e+06	2.42104e+06	3.15215e+06	2.09817e+06	3.74864e+06	2.49442e+06	1.8406e+06	3.68686e+06	1.93901e+06	2.27945e+06	4.4777e+06	2.7978e+06	2.73747e+06	3.51978e+06	2.33815e+06	1.98777e+06	1.84892e+06
M217T309	N-a-Acetylcitrulline	217.108	309.5	217.106	0.738627	C8H15N3O4	[M]+	Carboxylic acids and derivatives	Amino acids, peptides, and analogues	C15532	Amino acid metabolism; Global and overview maps	33965-42-3	HMDB0000856	BioDeepDB	2	pos	1.65656e+07	1.63469e+07	1.90437e+07	1.76406e+07	2.31693e+07	2.03753e+07	2.60694e+07	2.61202e+07	1.30213e+07	1.32804e+07	1.23811e+07	1.35004e+07	7.6782e+06	7.63177e+06	7.53698e+06	6.65694e+06	8.51466e+06	9.4611e+06	7.29363e+06	8.54677e+06	8.51455e+06	6.67457e+06	9.32686e+06	7.50711e+06
M221T434	2-trans,6-trans-Farnesal	221.19	434	220.183	0.000729187	C15H24O	[M+H]+	Prenol lipids	Sesquiterpenoids	C03461	Global and overview maps; Metabolism of terpenoids and polyketides	502-67-0 / 19317-11-4	HMDB0060356	BioDeepDB	2	pos	796014	681783	842769	853677	814424	685828	232459	366808	1.01527e+06	734374	826913	1.21423e+06	1.06041e+07	6.6658e+06	991173	943735	500025	523923	547138	523086	558288	508486	207809	147047
M223T448	Apiole	223.097	448	222.089	1.45228	C12H14O4	[M+H]+	Benzodioxoles		C10429		523-80-8	HMDB0033776	BioDeepDB	2	pos	1.2027e+06	1.36453e+06	1.33324e+06	1.39808e+06	1.177e+06	1.38292e+06	1.45688e+06	1.26294e+06	2.07454e+06	1.25224e+06	1.21586e+06	1.37596e+06	1.33755e+06	1.29916e+06	1.17863e+06	1.38895e+06	1.29253e+06	1.40285e+06	1.41701e+06	1.23084e+06	1.40366e+06	1.48196e+06	1.33194e+06	1.24895e+06
M233T436	Isoalantolactone	233.154	436.2	232.146	0.471005	C15H20O2	[M+H]+	Prenol lipids	Terpene lactones	C09484		470-17-7	HMDB0035934	BioDeepDB	2	pos	1.27602e+07	1.11291e+07	1.20847e+07	1.05855e+07	1.3492e+06	1.26594e+06	1.68469e+06	1.17011e+06	1.51672e+06	1.72522e+06	1.91662e+06	1.24622e+06	128256	139563	70259.4	782574	5.88017e+06	6.42155e+06	6.06241e+06	5.71962e+06	2.32498e+06	2.27391e+06	2.25104e+06	2.1541e+06
M235T415	Confertifolin	235.169	414.6	234.162	0.0114763	C15H22O2	[M+H]+			C09376		1811-23-0		BioDeepDB	2	pos	2.1299e+06	1.81864e+06	2.29401e+06	1.89322e+06	2.26336e+06	2.47359e+06	2.35359e+06	2.25886e+06	2.44066e+06	2.72036e+06	2.69827e+06	2.67553e+06	2.36874e+06	2.32175e+06	2.05266e+06	2.14512e+06	2.90349e+06	2.74804e+06	2.51091e+06	2.54927e+06	2.29782e+06	2.41104e+06	2.29791e+06	2.35726e+06
M247T418	alpha-Santonin	247.133	417.5	246.126	2.52495	C15H18O3	[M+H]+			C02206		481-06-1		BioDeepDB	2	pos	891451	813327	783339	905033	225181	283753	421039	278988	193502	175485	262229	147387	131388	118656	64820.4	56109.3	976533	1.04531e+06	879188	917624	515922	491583	457130	482940
M280T490	3-Ketosphingosine	280.265	489.7	297.267	18.6752	C18H35NO2	[M+H-H2O]+			C06121				BioDeepDB	2	pos	1.85135e+06	1.77122e+06	1.41827e+07	7.55662e+06	1.51124e+07	1.89243e+07	1.40683e+07	7.41757e+06	7.47175e+06	1.60913e+07	1.02999e+07	9.20882e+06	8.82874e+06	8.501e+06	2.55654e+06	1.18059e+07	1.46291e+06	1.40267e+07	1.30467e+07	1.28417e+06	1.03983e+07	9.08656e+06	2.6578e+06	1.04326e+06
M283T262	4-(beta-D-Glucosyloxy)benzoate	283.081	262.1	300.084	14.2503	C13H16O8	[M+H-H2O]+			C03993	Metabolism of cofactors and vitamins			BioDeepDB	2	pos	7.76225e+06	786465	1.04972e+06	604982	1.45564e+06	536573	885475	1517.63	512375	4788.95	649049	453211	509787	1812.83	545678	273929	1.98967e+06	1.24921e+07	126429	498280	607993	646405	345309	4.23512e+06
M284T630	Sphinganine	284.295	629.9	301.298	13.8378	C18H39NO2	[M+H-H2O]+	Organonitrogen compounds	Amines	C00836	Lipid metabolism; Signal transduction; Global and overview maps	764-22-7	HMDB0000269	BioDeepDB	2	pos	1.1463e+08	1.19051e+08	1.70766e+08	8.44013e+07	2.64835e+08	1.67408e+08	1.10938e+09	1.2949e+08	1.55348e+08	2.00185e+08	1.69723e+08	2.91359e+08	1.94879e+08	1.30002e+09	2.91936e+08	1.5197e+09	1.18996e+08	1.84539e+08	2.12367e+08	1.63443e+08	1.9753e+08	2.25522e+08	1.32209e+08	1.27192e+08
M293T495	12-OPDA	293.211	495.1	292.204	0.111297	C18H28O3	[M+H]+			C01226	Lipid metabolism; Global and overview maps	67204-66-4 / 85551-10-6		BioDeepDB	2	pos	4.5083e+06	3.43726e+06	3.7003e+06	2.8308e+06	1.26558e+06	2.5237e+06	314784	816112	4.92796e+06	5.03543e+06	3.06555e+06	5.1612e+06	670599	4.35392e+06	2.57061e+06	633625	1.00755e+07	2.76079e+06	9.4294e+06	4.85535e+06	4.05986e+06	5.89516e+06	7.46134e+06	7.73149e+06
M295T415	9(S)-HOT	295.227	414.6	294.219	0.596152	C18H30O3	[M+H]+			C16326	Lipid metabolism	89886-42-0		BioDeepDB	2	pos	3.50969e+06	983570	704699	5.00537e+06	1.88193e+06	859791	1.11819e+06	1.13282e+06	86498.2	2.87162e+06	2.25856e+06	2.35513e+06	313432	1.05421e+06	5.01423e+06	2.69051e+06	2.74158e+06	3.16855e+06	442089	456831	2.58691e+06	2.83597e+06	976093	1.36549e+06
M298T544	Spiroxamine	298.274	544.4	297.267	0.101243	C18H35NO2	[M+H]+			C11124		118134-30-8		BioDeepDB	2	pos	907629	407884	2.60333e+06	511317	4.26251e+06	1.4841e+06	1.40281e+06	3.28321e+06	1.28774e+06	2.66839e+06	2.28929e+06	6.23189e+06	3.80006e+06	1.66981e+06	2.88337e+06	2.07931e+06	2.37578e+06	3.64567e+06	1.57485e+06	1.55434e+06	2.72256e+06	4.1077e+06	2.69355e+06	3.98113e+06
M299T449	Norethindrone	299.201	448.9	298.193	0.0802137	C20H26O2	[M+H]+	Steroids and steroid derivatives	Estrane steroids	C05028		68-22-4	HMDB0014855	BioDeepDB	2	pos	511094	365367	190408	402279	403807	457186	436439	763089	4.05309e+06	8.22091e+06	2.49258e+07	3.55278e+06	5.99288e+06	1.7756e+06	3.47403e+06	1.52235e+06	659215	729632	606630	577611	646536	747753	379344	1.21347e+06
M301T476	9-cis-Retinoic acid	301.216	475.9	300.209	0.079677	C20H28O2	[M+H]+	Prenol lipids	Retinoids	C15493	Cancer: overview; Metabolism of cofactors and vitamins; Endocrine system; Cancer: specific types; Immune system	5300-03-8	HMDB0002369	BioDeepDB	2	pos	2.77561e+06	2.09018e+06	2.61408e+06	3.18348e+06	3.01191e+06	2.97991e+06	2.97528e+06	3.34187e+06	940771	1.17485e+06	973887	900625	1.3084e+06	948555	1.35186e+06	1.28701e+06	4.46962e+06	4.64547e+06	4.60227e+06	4.40593e+06	4.4574e+06	5.77856e+06	2.89179e+06	5.25538e+06
M314T473	Progesterone	314.232	472.9	314.225	24.1859	C21H30O2	[M]+	Steroids and steroid derivatives	Pregnane steroids	C00410	Endocrine and metabolic disease; Cancer: overview; Cell growth and death; Endocrine system; Lipid metabolism; Cancer: specific types; Target-based classification: Nuclear receptors; Global and overview maps	57-83-0	HMDB0001830	BioDeepDB	2	pos	469708	700952	639731	772246	719774	704549	905959	845692	1.05688e+06	754471	819702	625964	763177	657265	1.52893e+06	944660	596437	589092	506123	587143	783671	1.1059e+06	609842	428886
M337T438	Prostaglandin E1	337.236	438.4	354.241	0.605924	C20H34O5	[M+H-H2O]+	Fatty Acyls	Eicosanoids	C04741		745-65-3	HMDB0001442	BioDeepDB	2	pos	1.76009e+06	1.32726e+06	1.96619e+06	1.45017e+06	1.27639e+06	2.08579e+06	4.88716e+06	4.16685e+06	531302	492989	671319	430914	625985	242379	408772	77637	1.61519e+06	1.68205e+06	1.15604e+06	1.61992e+06	557313	581699	867323	1.47084e+06
M349T561	17alpha,21-Dihydroxypregnenolone	349.237	561.1	348.23	0.217617	C21H32O4	[M+H]+	Steroids and steroid derivatives	Hydroxysteroids	C05487	Lipid metabolism	1167-48-2	HMDB0006762	BioDeepDB	2	pos	3.12268e+06	1.31876e+06	2.36223e+06	1.90095e+06	1.39234e+06	2.62082e+06	1.29952e+06	1.26556e+06	1.28953e+06	2.16814e+06	2.18639e+06	1.38611e+06	2.47744e+06	1.61763e+06	1.25853e+06	1.3458e+06	1.07565e+06	1.5203e+06	1.63822e+06	1.27788e+06	1.44037e+06	1.32264e+06	1.34115e+06	2.20964e+06
M349T558	2-Hydroxy-6-pentadecylbenzoic acid	349.275	558.4	348.266	1.74653	C22H36O3	[M+H]+	Benzene and substituted derivatives	Benzoic acids and derivatives	C10759		16611-84-0	HMDB0029683	BioDeepDB	2	pos	675344	1.26505e+07	1.56467e+07	3.87705e+07	1.22698e+07	1.23361e+06	1.97884e+07	7.6926e+06	8.5922e+06	2.20949e+06	1.30024e+07	2.018e+07	5.08909e+06	1.10524e+07	1.88416e+07	9.56849e+06	1.33217e+06	1.91323e+07	1.04582e+07	1.46109e+07	7.97442e+07	2.20265e+07	8.54681e+06	1.10661e+07
M351T388_1	Misoprostol	351.252	388.2	368.256	1.80608	C21H36O5	[M+H-H2O]+			C07227		59122-46-2		BioDeepDB	2	pos	5.69756e+06	6.34574e+06	7.41299e+06	6.9865e+06	3.94936e+06	6.7771e+06	1.07497e+07	9.32121e+06	1.25938e+06	3.84388e+06	5.72787e+06	5.66418e+06	3.25342e+06	1.96419e+06	3.66224e+06	274844	3.49866e+06	3.93628e+06	662630	3.31359e+06	3.42191e+06	4.33148e+06	5.08675e+06	7.60648e+06
M353T528	Bursehernin	353.139	528	370.142	12.556	C21H22O6	[M+H-H2O]+			C21183	Biosynthesis of other secondary metabolites; Global and overview maps	40456-51-7		BioDeepDB	2	pos	704629	535619	653812	1.01867e+06	967054	753436	862085	699624	817044	658363	1.16593e+06	739303	802358	821428	707301	774511	954626	390743	718908	670698	688335	907222	448594	647138
M367T447	Zymosterol intermediate 2	367.321	447.2	384.339	28.4928	C27H44O	[M+H-H2O]+	Steroids and steroid derivatives	Cholestane steroids	C05437	Lipid metabolism; Global and overview maps	128-33-6	HMDB0006271	BioDeepDB	2	pos	773099	697554	809968	882831	833789	843289	617680	770346	812451	760508	805564	933106	671775	584395	717841	746597	1.01365e+06	1.59847e+06	1.0877e+06	1.08589e+06	790260	688372	1.04503e+06	969589
M377T683	Ergosta-5,7,22,24(28)-tetraen-3beta-ol	377.321	683.3	394.324	13.3414	C28H42O	[M+H-H2O]+			C05440	Lipid metabolism; Global and overview maps	29560-24-5		BioDeepDB	2	pos	2.33724e+07	3.47013e+07	1.77762e+07	1.70164e+07	2.7866e+07	8.33424e+06	3.61957e+07	1.99714e+07	8.10081e+06	2.07162e+07	3.20422e+07	6.03796e+06	3.46194e+07	9.78596e+06	1.69725e+07	1.07902e+07	3.16827e+07	5.12227e+06	4.97905e+06	1.28951e+07	1.35611e+07	2.40984e+07	1.0615e+07	1.32355e+07
M385T555	Campestanol	385.368	554.8	402.386	29.2344	C28H50O	[M+H-H2O]+			C15787	Global and overview maps; Metabolism of terpenoids and polyketides	474-60-2		BioDeepDB	2	pos	1.12402e+07	1.19279e+07	9.14216e+06	1.04867e+07	9.36444e+06	1.04578e+07	8.72131e+06	1.0911e+07	8.58377e+06	8.19841e+06	7.99392e+06	7.68722e+06	1.03749e+07	1.12199e+07	1.46759e+07	1.10436e+07	7.66773e+06	9.26876e+06	1.28837e+07	1.36522e+07	2.27213e+07	1.8107e+07	2.42163e+07	7.57677e+06
M397T543	5alpha-Ergosta-7,22-diene-3beta,5-diol	397.347	543.3	414.35	12.4173	C28H46O2	[M+H-H2O]+			C04416				BioDeepDB	2	pos	1.55802e+06	619553	1.1162e+06	2.10347e+06	1.05979e+06	1.05644e+06	2.9889e+06	4.62709e+06	1.37246e+06	1.97893e+06	3.10199e+06	2.78918e+06	867420	923012	4.72209e+06	1.43075e+06	976514	748321	3.34724e+06	4.19867e+06	1.27378e+06	6.93458e+06	6.55573e+06	2.62298e+06
M425T581	Alpha-Tocotrienol	425.308	581.4	424.334	4.55947	C29H44O2	[M+H]+	Prenol lipids	Quinone and hydroquinone lipids	C14153	Metabolism of cofactors and vitamins; Global and overview maps	1721-51-3 / 58864-81-6	HMDB0006327	BioDeepDB	2	pos	2.00313e+07	1.31462e+07	1.42622e+07	1.56864e+07	1.97108e+07	2.04506e+07	2.55487e+07	2.01441e+07	2.13203e+07	8.6847e+06	8.73934e+06	1.20299e+07	2.20207e+07	1.9756e+07	1.30978e+07	2.0837e+07	1.97646e+07	2.10475e+07	2.54842e+07	2.55051e+07	2.17551e+07	2.18009e+07	1.51202e+07	1.66037e+07
M427T539	Taraxerol	427.356	539	426.386	2.24287	C30H50O	[M+H]+	Prenol lipids	Sesterterpenoids	C08637	Global and overview maps; Metabolism of terpenoids and polyketides	127-22-0	HMDB0034920	BioDeepDB	2	pos	4.6869e+06	6.75956e+06	2.33089e+06	3.18537e+06	3.7897e+06	9.04147e+06	5.67631e+06	350257	4.89324e+06	3.97535e+06	5.51994e+06	2.64223e+06	3.7006e+06	4.70846e+06	4.77805e+06	5.82765e+06	3.31478e+06	5.80853e+06	977556	7.55366e+06	1.74667e+06	4.58421e+06	5.45134e+06	4.74443e+06
M441T621	24-Methylenecycloartanol	441.367	620.7	440.402	14.8097	C31H52O	[M+H]+			C08830	Lipid metabolism; Global and overview maps	1449-09-8		BioDeepDB	2	pos	9.92943e+06	4.47266e+06	9.64692e+06	5.8357e+06	7.45797e+06	6.33571e+06	4.44832e+06	7.10271e+06	1.094e+07	6.13178e+06	5.73156e+06	9.29593e+06	2.70341e+06	1.82636e+06	1.62951e+06	2.01723e+06	6.30688e+06	5.38237e+06	4.33761e+06	5.06663e+06	4.62467e+06	4.58387e+06	5.91998e+06	3.34372e+06
M552T674	beta-Cryptoxanthin	552.441	673.8	552.433	15.0242	C40H56O	[M]+			C08591	Global and overview maps; Metabolism of terpenoids and polyketides	472-70-8		BioDeepDB	2	pos	8.18532e+07	3.55177e+07	3.16946e+07	1.02035e+08	4.58482e+07	4.22234e+07	5.39765e+07	1.14338e+08	4.32045e+07	8.76032e+07	2.90004e+07	4.40171e+07	1.68107e+07	3.34121e+07	2.06625e+07	1.04028e+07	7.76276e+06	2.29333e+06	1.68151e+07	6.40715e+06	7.60576e+06	1.32758e+07	7.23089e+06	1.78379e+07
M128T47	Ammelide	128.035	47	128.033	15.6209	C3H4N4O2	[M]-	Azacyclic compounds	1,3,5-triazines	C08734	Xenobiotics biodegradation and metabolism; Global and overview maps	645-93-2		MetaDNA	2	neg	5.83156e+06	29799.3	4.12907e+06	4.93835e+06	3.7401e+06	4.53152e+06	4.84646e+06	5.71653e+06	6.87259e+06	5.34358e+06	6.42461e+06	4.13028e+06	1.04781e+07	5.83102e+06	5.85595e+06	6.64783e+06	3.56911e+06	3.54519e+06	3.95356e+06	4.01707e+06	3.55045e+06	4.61678e+06	6.81746e+06	4.92152e+06
M319T440	alpha-Zearalenol	319.16	440.4	320.162	14.9645	C18H24O5	[M-H]-	Benzene and substituted derivatives	1-hydroxy-2-unsubstituted benzenoids	C14750		36455-72-8	HMDB0041824	MetaDNA	2	neg	242838	3.51669e+07	65013.3	33817.4	36681.1	31945.9	22631.7	174743	1.10789e+06	632147	883148	221703	15260.6	14607.2	17902.3	14102.4	35429	42267.5	24564.4	304851	99900	15131.6	13357.4	15329.9
M312T444	8(R)-Hydroperoxylinoleic acid	312.227	444.4	312.23	11.2097	C18H32O4	[M]-	Carboxylic acids and derivatives	Alkyl hydroperoxides	C14831	Lipid metabolism	143343-95-7	HMDB0004706	MetaDNA	2	neg	239251	213304	251829	202740	344982	433727	159383	281951	168574	201339	172741	151801	124801	155243	119380	120570	359472	738301	560545	562381	216646	216417	179321	256663
M121T270	Erythritol	121.03	270.5	122.058	13.956	C4H10O4	[M-H]-			C00503	Membrane transport	149-32-6		BioDeepDB	2	neg	4.05549e+06	4.10704e+06	1.41539e+06	3.5609e+06	1.83937e+06	1.1318e+06	1.1249e+06	4.56502e+06	2.06081e+06	1.89712e+06	1.2407e+06	935073	1.80608e+06	1.56756e+06	1.35748e+06	6.37493e+06	1.09122e+06	5.63173e+06	3.94934e+06	4.27583e+06	1.48507e+06	4.49853e+06	4.58522e+06	4.35174e+06
M133T43_2	L-Malic acid	133.015	42.8	134.022	6.58572	C4H6O5	[M-H]-	Hydroxy acids and derivatives	Beta hydroxy acids and derivatives	C00149	Cancer: overview; Chemical structure transformation maps; Signal transduction; Sensory system; Endocrine system; Excretory system; Carbohydrate metabolism; Cancer: specific types; Energy metabolism; Global and overview maps	97-67-6/6915-15-7	HMDB0000156	BioDeepDB	2	neg	1.00218e+07	2.88105e+06	1.08102e+07	6.92084e+06	1.30148e+07	1.46155e+07	1.02643e+07	1.51519e+07	1.16958e+07	8.67419e+06	9.48213e+06	1.07383e+07	1.60912e+07	2.32622e+07	2.05875e+07	1.19074e+07	8.71201e+06	2.85212e+07	2.08442e+07	5.69702e+06	1.02795e+07	2.02655e+07	1.04622e+07	2.9745e+07
M135T638	Phenyl acetate	134.895	638.1	136.052	11.896	C8H8O2	[M-H]-			C00548		122-79-2		BioDeepDB	2	neg	2.66268e+06	7.74532e+06	8.08369e+06	5.98834e+06	7.12046e+06	8.49068e+06	7.42792e+06	1.06721e+07	2.27766e+06	2.04495e+06	5.54399e+06	2.30948e+06	9.19133e+06	2.27128e+06	2.35033e+06	5.93253e+06	7.41084e+06	6.05494e+06	7.06769e+06	9.31675e+06	8.17481e+06	2.31017e+06	6.4493e+06	9.32366e+06
M137T54	Urocanic acid	137.036	53.6	138.043	3.64867	C6H6N2O2	[M-H]-	Azoles	Imidazoles	C00785	Amino acid metabolism; Global and overview maps	104-98-3	HMDB0000301	BioDeepDB	2	neg	642419	674097	1.12992e+06	1.924e+06	1.40648e+06	415191	581351	1.20181e+06	828094	1.52226e+06	871221	951984	1.07123e+06	987764	668106	1.05059e+06	1.49487e+06	892051	986227	1.62302e+06	749131	1.03941e+06	456768	1.00742e+06
M144T320	Spermidine	143.915	319.7	145.158	0.650292	C7H19N3	[M-H]-	Organonitrogen compounds	Amines	C00315	Membrane transport; Metabolism of other amino acids; Digestive system; Biosynthesis of other secondary metabolites; Metabolism of terpenoids and polyketides; Amino acid metabolism; Global and overview maps	124-20-9	HMDB0001257	BioDeepDB	2	neg	1.38956e+06	2.47351e+06	1.05695e+06	2.45433e+06	1.45756e+06	2.97313e+06	1.51695e+06	2.86586e+06	2.69654e+06	2.87494e+06	2.24071e+06	1.91742e+06	1.4377e+06	1.61584e+07	1.21326e+06	1.75945e+06	1.18845e+06	2.55794e+06	2.27589e+06	1.25038e+06	6.83346e+06	1.04852e+07	1.46249e+06	1.14405e+07
M147T49	Nornicotine	146.966	49	148.1	6.66791	C9H12N2	[M-H]-	Pyridines and derivatives	Pyrrolidinylpyridines	C06524	Biosynthesis of other secondary metabolites	494-97-3	HMDB0001126	BioDeepDB	2	neg	1.14421e+07	8.68891e+06	1.13689e+07	1.08975e+07	1.26885e+07	9.13603e+06	8.3844e+06	6.84958e+06	6.25351e+07	5.07846e+07	6.99904e+07	1.0316e+08	2.68998e+07	1.78598e+07	4.63451e+07	1.71439e+07	1.52754e+07	1.07529e+07	7.50674e+06	9.41713e+06	8.14915e+06	9.81145e+06	7.18809e+06	7.21209e+06
M165T675	Phthalic acid	165.042	674.8	166.027	8.38073	C8H6O4	[M-H]-	Benzene and substituted derivatives	Benzoic acids and derivatives	C01606	Membrane transport; Xenobiotics biodegradation and metabolism; Global and overview maps	88-99-3 / 3198-29-6	HMDB0002107	BioDeepDB	2	neg	1.56956e+07	6.45365e+06	1.05563e+07	7.64996e+06	1.34006e+07	6.03441e+06	1.8081e+07	8.88448e+06	1.95569e+07	1.40237e+07	2.32345e+07	1.27277e+07	1.94168e+07	1.57678e+07	2.56166e+07	1.60957e+07	1.48766e+07	1.33115e+07	1.86849e+07	1.8555e+07	2.31352e+07	1.37041e+07	1.35325e+07	9.05042e+06
M151T334	3,4-Dihydroxyphenylglycol	151.041	333.8	170.058	11.8511	C8H10O4	[M-H2O-H]-	Phenols	Benzenediols	C05576	Amino acid metabolism; Global and overview maps	28822-73-3 / 3343-19-9	HMDB0000318	BioDeepDB	2	neg	885438	790771	811598	1.0918e+06	685297	776990	672243	889037	740200	726408	892190	794743	568210	727865	676551	758239	844415	872450	741364	763363	748384	767088	700585	832661
M153T46_2	Protocatechuic acid	153.017	45.6	154.027	9.78206	C7H6O4	[M-H]-	Benzene and substituted derivatives	Benzoic acids and derivatives	C00230	Chemical structure transformation maps; Xenobiotics biodegradation and metabolism; Global and overview maps; Metabolism of terpenoids and polyketides	99-50-3	HMDB0001856	BioDeepDB	2	neg	283255	350459	315851	304067	483920	524237	495078	548475	285106	284681	248790	260604	463976	427337	534539	477831	296745	468448	415449	321002	341698	367548	330988	383603
M172T43	4-Quinolinecarboxylic acid	171.912	42.6	173.048	18.3484	C10H7NO2	[M-H]-			C06414		486-74-8		BioDeepDB	2	neg	225983	712210	1.03181e+06	699379	593010	715890	682666	663673	719930	1.09739e+06	1.17376e+06	704532	554520	693047	169538	518837	779596	683479	978981	581479	535312	717233	648879	656716
M179T649	Caffeate	178.966	649	180.042	11.473	C9H8O4	[M-H]-			C01197	Chemical structure transformation maps; Biosynthesis of other secondary metabolites; Global and overview maps	501-16-6 / 331-39-5		BioDeepDB	2	neg	1.11254e+07	1.02064e+07	8.49798e+06	3.00756e+07	1.50142e+07	9.22053e+06	1.51484e+06	2.25905e+07	2.36489e+06	2.45944e+07	1.30949e+06	2.64695e+07	9.64523e+06	3.67161e+07	4.38625e+07	1.03565e+07	9.1561e+06	1.39951e+06	2.283e+07	2.46791e+07	3.52952e+07	1.96665e+07	3.24258e+07	1.00951e+07
M175T186	Guanidinosuccinic acid	174.954	185.6	175.059	3.36207	C5H9N3O4	[M]-	Carboxylic acids and derivatives	Amino acids, peptides, and analogues	C03139		6133-30-8	HMDB0003157	BioDeepDB	2	neg	963193	203303	110978	204012	228838	830325	175072	156589	739475	179093	1.06299e+06	1.00064e+06	611206	161818	130187	987739	644009	199442	808087	594382	579247	138112	108618	136201
M179T49	D-Fructose	179.056	49	180.063	2.0999	C6H12O6	[M-H]-			C00095	Endocrine and metabolic disease; Membrane transport; Sensory system; Digestive system; Carbohydrate metabolism; Global and overview maps	57-48-7		BioDeepDB	2	neg	1.68717e+07	3.01098e+06	1.74507e+07	1.67159e+07	3.72412e+06	1.57091e+07	4.38016e+06	3.97382e+06	1.38374e+07	4.37133e+06	1.84267e+07	3.93626e+06	1.28843e+07	3.8611e+06	2.6413e+07	4.4973e+06	4.40449e+06	5.93295e+06	1.43994e+07	1.06935e+07	1.15571e+07	3.92753e+06	4.15269e+06	1.58179e+07
M205T403	3-Oxalomalate	205.014	403.3	206.006	6.67755	C6H6O8	[M-H]-			C01990	Carbohydrate metabolism	3687-15-8 / 89304-26-7		BioDeepDB	2	neg	3.61812e+06	1.59025e+06	1.67427e+06	967138	2.28446e+06	1.94937e+06	2.79752e+06	1.69242e+06	1.73874e+06	4.54763e+06	1.43059e+06	1.32185e+06	2.48328e+06	2.06234e+06	2.39462e+06	2.27943e+06	2.9533e+06	552082	1.49501e+06	3.41509e+06	1.12924e+06	1.13341e+06	1.65449e+06	2.01698e+06
M187T73_2	Azelaic acid	187.099	72.5	188.105	6.81992	C9H16O4	[M-H]-	Fatty Acyls	Fatty acids and conjugates	C08261		123-99-9	HMDB0000784	BioDeepDB	2	neg	1.23995e+06	2.4135e+06	1.13965e+06	1.15369e+06	3.505e+06	2.77078e+06	1.61566e+06	1.31857e+06	1.22952e+06	1.77244e+06	2.89817e+06	3.48238e+06	2.25482e+06	1.61762e+06	2.48714e+06	3.06556e+06	2.97982e+06	2.49837e+06	1.85438e+06	2.72379e+06	2.41255e+06	1.77014e+06	1.59664e+06	2.61622e+06
M223T640	Thymidine	223.029	640	242.09	4.51788	C10H14N2O5	[M-H2O-H]-	Pyrimidine nucleosides	Pyrimidine 2'-deoxyribonucleosides	C00214	Global and overview maps; Nucleotide metabolism	50-89-5	HMDB0000273	BioDeepDB	2	neg	1.16007e+07	4.38364e+07	3.43475e+07	3.94084e+07	3.68841e+07	1.04297e+07	3.30211e+07	1.16927e+07	3.8143e+07	5.65537e+07	1.13299e+07	1.1965e+07	1.14851e+07	1.14077e+07	1.08294e+07	4.63597e+07	9.77787e+06	6.95806e+07	4.56997e+06	9.40845e+07	5.5247e+07	5.51892e+07	3.46591e+07	1.19442e+07
M227T591	Myristic acid	227.202	590.6	228.209	3.85559	C14H28O2	[M-H]-	Fatty Acyls	Fatty acids and conjugates	C06424	Lipid metabolism; Global and overview maps	544-63-8	HMDB0000806	BioDeepDB	2	neg	6.88458e+07	6.78176e+07	1.77559e+07	6.14718e+07	6.6356e+07	7.15303e+07	6.89308e+07	6.49304e+07	6.14183e+07	6.95588e+07	6.625e+07	6.68384e+07	5.6804e+07	6.45356e+07	6.35122e+07	5.8891e+07	5.40711e+07	5.4494e+07	7.32479e+07	6.70089e+07	5.64121e+07	5.65155e+07	5.94967e+07	6.62582e+07
M243T56	Cytidine	242.944	56.5	243.085	3.96935	C9H13N3O5	[M]-			C00475	Membrane transport; Global and overview maps; Nucleotide metabolism	65-46-3		BioDeepDB	2	neg	1.51457e+06	1.44332e+06	1.20519e+06	1.17832e+06	1.39219e+06	1.56991e+06	1.42456e+06	1.21898e+06	1.08939e+06	1.46357e+06	1.41795e+06	1.41617e+06	1.12793e+06	1.28127e+06	1.50175e+06	1.46642e+06	987966	1.38131e+06	1.43367e+06	1.57015e+06	1.15144e+06	888920	1.38219e+06	1.45039e+06
M243T54_1	Uridine	243.063	53.8	244.07	4.83824	C9H12N2O6	[M-H]-	Pyrimidine nucleosides		C00299	Membrane transport; Global and overview maps; Nucleotide metabolism	58-96-8	HMDB0000296	BioDeepDB	2	neg	477863	449907	754712	500696	484976	594672	575730	450262	422780	559493	454081	403540	440423	467704	527907	606595	825742	553127	720823	465499	366946	529847	440021	500356
M283T597	Guanosine	283.272	597.2	283.092	28.6909	C10H13N5O5	[M]-	Purine nucleosides		C00387	Membrane transport; Global and overview maps; Nucleotide metabolism	118-00-3	HMDB0000133	BioDeepDB	2	neg	2.01605e+07	8.91067e+06	1.00312e+07	8.15061e+06	1.79778e+07	1.56926e+07	1.14311e+07	1.32475e+07	1.3809e+07	1.2252e+07	1.881e+07	1.15498e+07	1.57202e+07	1.58704e+07	1.86777e+07	3.35695e+07	1.08555e+07	8.06763e+06	5.8534e+06	3.30857e+06	1.12972e+07	1.38873e+07	1.4452e+07	7.1131e+06
M266T73	Deoxyguanosine	266.089	72.7	267.097	0.466009	C10H13N5O4	[M-H]-	Purine nucleosides	Purine 2'-deoxyribonucleosides	C00330	Membrane transport; Global and overview maps; Nucleotide metabolism	961-07-9	HMDB0000085	BioDeepDB	2	neg	150276	137274	120524	171975	171312	147365	194638	417035	126934	159303	182268	231167	148813	130075	100521	171800	377954	176911	106328	173473	114612	125223	168475	268330
M267T401	Formononetin	267.066	400.9	268.074	0.0562949	C16H12O4	[M-H]-	Isoflavonoids	O-methylated isoflavonoids	C00858	Chemical structure transformation maps; Biosynthesis of other secondary metabolites; Global and overview maps	485-72-3	HMDB0005808	BioDeepDB	2	neg	1.28134e+06	984796	1.0631e+06	827489	845438	720944	2.30396e+06	397850	124966	97381.5	69619.8	198325	85285.5	11878.1	19631.7	23291.3	12477.6	203289	52522.3	129819	24579.8	12739.5	9798.34	10360.5
M269T468	Genistein	269.046	468	270.053	2.51258	C15H10O5	[M-H]-	Isoflavonoids	Isoflav-2-enes	C06563	Chemical structure transformation maps; Biosynthesis of other secondary metabolites; Global and overview maps	446-72-0	HMDB0003217	BioDeepDB	2	neg	1.0007e+06	1.0482e+06	892204	946902	592957	597273	653069	537823	784626	862073	780537	842252	531057	548805	424846	506825	1.18128e+06	1.34204e+06	1.23e+06	1.09468e+06	769046	926943	968706	820682
M269T543	Dehydroepiandrosterone	269.209	542.9	288.209	10.0521	C19H28O2	[M-H2O-H]-	Steroids and steroid derivatives	Androstane steroids	C01227	Cancer: overview; Endocrine system; Lipid metabolism; Xenobiotics biodegradation and metabolism; Cancer: specific types; Global and overview maps	53-43-0	HMDB0000077	BioDeepDB	2	neg	8989.74	267759	430748	169208	22508.1	30775.5	1.71123e+06	36892.4	9813.13	19604.1	19196.6	15540.2	11897.7	11669.4	13744.1	13985.4	2.13696e+07	2.12676e+07	3.07562e+07	1.32574e+07	1.16826e+06	238617	183239	226096
M271T524	Epiandrosterone	271.229	524.1	290.225	4.53161	C19H30O2	[M-H2O-H]-	Steroids and steroid derivatives	Androstane steroids	C07635	Xenobiotics biodegradation and metabolism; Global and overview maps	481-29-8	HMDB0000365	BioDeepDB	2	neg	4.4252e+06	3.84239e+06	4.16582e+06	4.7095e+06	850667	2.44505e+06	2.62693e+06	2.37272e+06	655249	2.20924e+06	2.30176e+06	1.63949e+06	1.89081e+06	1.57063e+06	1.68917e+06	3.45741e+06	8.0538e+06	1.22293e+07	5.73348e+06	3.83413e+06	3.05397e+06	2.82751e+06	3.02292e+06	2.92027e+06
M277T583	Alpha-Linolenic acid	277.217	583	278.225	1.16876	C18H30O2	[M-H]-	Fatty Acyls	Lineolic acids and derivatives	C06427	Lipid metabolism; Chemical structure transformation maps; Global and overview maps	463-40-1	HMDB0001388	BioDeepDB	2	neg	1.01108e+08	5.6933e+07	4.29249e+07	6.4887e+07	1.01625e+08	6.62394e+07	1.46843e+08	6.21064e+07	1.31307e+08	1.24866e+08	9.30692e+07	9.17542e+07	6.57113e+07	5.4173e+07	7.72976e+07	5.85332e+07	2.47257e+08	2.66166e+08	2.08055e+08	1.91759e+08	1.19465e+08	9.87673e+07	1.14794e+08	2.16472e+08
M299T576	Kaempferide	299.26	576.3	300.063	2.27368	C16H12O6	[M-H]-	Flavonoids	O-methylated flavonoids	C10098	Biosynthesis of other secondary metabolites	491-54-3	HMDB0037441	BioDeepDB	2	neg	3.29851e+07	1.98397e+06	1.72376e+06	3.26988e+07	1.29464e+07	9.10814e+06	5.73707e+07	3.66382e+07	2.50689e+07	2.39301e+07	3.98921e+07	1.3486e+07	1.51485e+07	1.18897e+07	3.83585e+07	7.6138e+07	6.35178e+06	8.38206e+06	9.65272e+06	5.75299e+06	3.14312e+07	2.62725e+07	5.30286e+07	2.6841e+07
M297T591	Nonadecanoic acid	297.281	590.5	298.287	2.61033	C19H38O2	[M-H]-	Fatty Acyls	Fatty acids and conjugates	C16535		646-30-0	HMDB0000772	BioDeepDB	2	neg	1.50301e+06	3.36386e+06	1.46373e+06	736920	2.20031e+07	2.12942e+07	3.19933e+07	2.03061e+07	2.13851e+06	1.10467e+07	1.28311e+07	267099	7.52617e+06	1.09574e+07	1.07325e+07	1.04637e+07	2.03009e+07	2.65471e+07	3.31819e+07	2.67817e+07	1.52484e+07	1.49925e+07	1.72655e+07	1.39152e+07
M299T559	all-trans-Retinoic acid	299.203	558.9	300.209	3.262	C20H28O2	[M-H]-	Prenol lipids	Retinoids	C00777	Cancer: overview; Metabolism of cofactors and vitamins; Cancer: specific types; Immune system; Global and overview maps	302-79-4	HMDB0001852	BioDeepDB	2	neg	3.14088e+07	1.5784e+07	1.8992e+07	2.48739e+07	9.79406e+06	8.16779e+06	1.3617e+07	1.90052e+06	6.29754e+06	1.37751e+07	1.02914e+07	1.19232e+06	537982	340104	376999	196193	9.47556e+07	1.03976e+08	7.49053e+07	6.22251e+07	1.10255e+07	1.23235e+07	1.36607e+07	1.06775e+07
M327T594_1	Docosahexaenoic acid	327.234	593.5	328.24	3.6671	C22H32O2	[M-H]-	Fatty Acyls	Fatty acids and conjugates	C06429	Lipid metabolism	6217-54-5	HMDB0002183	BioDeepDB	2	neg	7.20242e+06	3.9754e+06	5.43157e+06	864442	4.87858e+06	1.16709e+06	7.00747e+06	897991	5.92407e+06	9.7864e+06	5.15882e+06	3.44337e+06	5.36249e+06	4.31363e+06	3.53272e+06	3.28568e+06	5.81834e+06	1.05635e+07	6.83298e+06	6.79655e+06	1.33289e+07	4.86092e+06	3.3215e+06	4.58128e+06
M339T484	Fructose 1,6-bisphosphate	339.2	483.6	339.996	0.70867	C6H14O12P2	[M-H]-	Organooxygen compounds	Carbohydrates and carbohydrate conjugates	C00354	Cancer: overview; Signal transduction; Endocrine system; Amino acid metabolism; Energy metabolism; Global and overview maps	488-69-7	HMDB0001058	BioDeepDB	2	neg	4.96778e+06	8.61017e+06	1.05942e+07	9.05395e+06	8.6786e+06	8.77796e+06	9.54166e+06	7.47259e+06	111978	225565	798473	2.88219e+06	749149	653966	2.89243e+06	327234	8.03078e+06	7.52528e+06	8.61509e+06	7.71552e+06	5.72509e+06	4.59066e+06	5.82347e+06	7.09626e+06
M341T668	Rosmarinic acid	341.308	668.3	360.084	5.45337	C18H16O8	[M-H2O-H]-	Cinnamic acids and derivatives	Hydroxycinnamic acids and derivatives	C01850	Amino acid metabolism; Global and overview maps	537-15-5 / 20283-92-5 537-15-5 / 20283-92-5	HMDB0003572	BioDeepDB	2	neg	1.28075e+07	6.72254e+06	7.14392e+06	9.05501e+06	8.49373e+06	5.65258e+06	1.39618e+07	1.08897e+07	1.2356e+07	8.08486e+06	1.26386e+07	1.31272e+07	1.05564e+07	1.1816e+07	1.2599e+07	1.56759e+07	1.0985e+07	1.02516e+07	1.10528e+07	9.9266e+06	1.45042e+07	1.36171e+07	1.20204e+07	9.43234e+06
M371T537	Deoxycorticosterone acetate	371.067	537.2	372.23	1.48636	C23H32O4	[M-H]-			C14554		56-47-3		BioDeepDB	2	neg	6.61538e+06	5.09114e+06	2.30209e+06	5.7579e+06	5.66083e+06	6.49391e+06	1.10776e+06	6.27412e+06	3.63833e+06	9.26909e+06	612453	804114	532271	343064	2.77676e+07	438657	2.21225e+07	846622	200419	348155	508055	394282	502201	168062
M391T622_1	Deoxycholic acid	391.263	621.8	392.293	27.5552	C24H40O4	[M-H]-	Steroids and steroid derivatives	Bile acids, alcohols and derivatives	C04483	Lipid metabolism; Digestive system	83-44-3	HMDB0000626	BioDeepDB	2	neg	5.61629e+07	3.39913e+07	4.4212e+07	3.99748e+07	3.14833e+07	2.54998e+07	5.10246e+07	3.53368e+07	3.83295e+07	2.19635e+07	2.7183e+07	2.40109e+07	1.99783e+07	2.78517e+07	4.75645e+07	5.32822e+07	4.94836e+07	6.43807e+07	6.70294e+07	2.23596e+07	3.31319e+07	3.15168e+07	2.64014e+07	2.73582e+07
M401T302	25-Hydroxycholesterol	401.089	301.6	402.35	4.14241	C27H46O2	[M-H]-	Steroids and steroid derivatives	Cholestane steroids	C15519	Lipid metabolism	2140-46-7	HMDB0006247	BioDeepDB	2	neg	122.27	207.33	187.36	25095.8	17863.6	30463.8	118.852	26970.5	96.9335	27948.8	185.336	342.609	124.702	445.324	92.2728	109.217	119660	1.14161e+06	10145.6	44768.1	24768.5	26228.9	24605.2	96925
M449T579	Glycochenodeoxycholic acid	449.31	579.4	449.314	0.223079	C26H43NO5	[M]-			C05466	Lipid metabolism; Digestive system	16564-43-5		BioDeepDB	2	neg	7.29308e+07	2.16633e+07	2.36039e+07	2.17277e+07	5.94917e+07	6.89467e+06	3.23611e+07	7.44235e+07	1.14606e+08	7.08659e+07	9.00136e+07	7.17734e+07	8.46017e+07	6.32383e+07	8.34279e+07	4.99647e+07	8.67597e+07	1.92026e+07	6.47865e+07	6.56887e+07	7.89531e+07	5.99207e+07	8.15638e+07	1.83534e+07
M471T511	Maslinic acid	471.353	510.8	472.355	7.71886	C30H48O4	[M-H]-	Prenol lipids	Triterpenoids	C16939		4373-41-5	HMDB0002392	BioDeepDB	2	neg	4.13065e+06	3.02168e+06	9.37501e+07	2.50797e+06	4.59147e+06	3.5473e+06	1.46589e+07	2.26494e+06	3.70468e+06	2.50102e+06	8.8388e+06	3.331e+06	5.93547e+06	1.16535e+06	3.86355e+06	2.19998e+06	3.1061e+08	1.18442e+08	1.05356e+08	8.8852e+07	4.29606e+07	8.17453e+06	1.01441e+08	2.8285e+07
M117T43	Succinic acid	117.02	42.9	118.027	5.77679	C4H6O4	[M-H]-	Carboxylic acids and derivatives	Dicarboxylic acids and derivatives	C00042	Cancer: overview; Metabolism of cofactors and vitamins; Chemical structure transformation maps; Signal transduction; Nervous system; Endocrine system; Carbohydrate metabolism; Xenobiotics biodegradation and metabolism; Amino acid metabolism; Energy metabolism; Global and overview maps	110-15-6	HMDB0000254	BioDeepDB	2	neg	2.04197e+06	1.40933e+06	2.46172e+06	2.08814e+06	2.55391e+06	1.44766e+06	3.15143e+06	3.75253e+06	2.39426e+06	2.63921e+06	2.04401e+06	3.23305e+06	3.56437e+06	2.93051e+06	2.64857e+06	1.56205e+06	1.58916e+06	1.67685e+06	1.25697e+06	2.02882e+06	2.23022e+06	4.74536e+06	3.09329e+06	2.49505e+06
M128T611	Cyanuric acid	128.011	611.3	129.017	3.90592	C3H3N3O3	[M-H]-	Triazines	1,3,5-triazines	C06554	Xenobiotics biodegradation and metabolism; Global and overview maps	108-80-5/504-19-8	HMDB0041861	BioDeepDB	2	neg	5.73759e+06	1.3085e+07	1.87641e+07	2.72881e+07	2.25375e+07	2.91793e+07	3.10547e+07	3.05972e+07	1.81618e+07	1.30081e+07	1.83434e+07	1.37135e+07	1.64865e+07	1.58754e+07	1.73465e+07	2.09585e+07	1.30327e+07	1.53561e+07	2.06281e+07	1.31617e+07	1.40663e+07	2.83866e+07	1.32962e+07	2.05427e+07
M130T84	Fluorouracil	130.018	83.9	130.018	2.30737	C4H3FN2O2	[M]-	Diazines	Pyrimidines and pyrimidine derivatives	C07649	Xenobiotics biodegradation and metabolism; Digestive system	51-21-8	HMDB0014684	BioDeepDB	2	neg	1.91176e+06	1.75382e+06	1.71206e+06	6.28121e+06	6.11816e+06	6.2697e+06	7.59346e+06	6.39581e+06	6.4745e+06	5.71296e+06	4.58392e+06	8.22329e+06	2.97714e+06	9.34771e+06	1.0616e+07	9.97469e+06	9.05662e+06	2.12664e+06	1.05672e+07	7.23626e+06	8.57314e+06	8.51831e+06	8.84256e+06	8.44037e+06
M138T336	4-Nitrophenol	138.02	336	139.027	5.79624	C6H5NO3	[M-H]-	Phenols	Nitrophenols	C00870	Xenobiotics biodegradation and metabolism; Global and overview maps	100-02-7	HMDB0001232	BioDeepDB	2	neg	7.58616e+06	7.67416e+06	7.95253e+06	7.69149e+06	6.05199e+06	5.57206e+06	4.66066e+06	7.22565e+06	4.93582e+06	5.12135e+06	5.58191e+06	5.06591e+06	3.84342e+06	5.27348e+06	5.419e+06	4.76238e+06	3.65752e+06	9.3102e+06	9.88301e+06	6.82336e+06	7.97148e+06	8.86991e+06	8.18485e+06	9.14258e+06
M145T320	Adipic acid	145.05	320.4	146.058	4.82593	C6H10O4	[M-H]-	Fatty Acyls	Fatty acids and conjugates	C06104	Xenobiotics biodegradation and metabolism; Global and overview maps	124-04-9	HMDB0000448	BioDeepDB	2	neg	435190	213438	303729	895037	409052	140559	575232	802269	362131	284121	444449	429952	586675	879794	490174	548325	759778	533605	551676	744125	625771	523901	358021	712293
M152T382	Aminosalicylic Acid	152.036	382.1	153.043	5.10405	C7H7NO3	[M-H]-	Benzene and substituted derivatives	Benzoic acids and derivatives	C02518		65-49-6	HMDB0014378	BioDeepDB	2	neg	3.6321e+06	2.24804e+06	2.25393e+06	2.2774e+06	2.39332e+06	2.80213e+06	2.34386e+06	2.75405e+06	3.17168e+06	2.24037e+06	2.63875e+06	4.22624e+06	3.21602e+06	2.0633e+06	2.23167e+06	2.85512e+06	2.15531e+06	2.24475e+06	2.06371e+06	2.07336e+06	2.37762e+06	3.03064e+06	3.0556e+06	2.89898e+06
M175T433	D-Glucuronic acid	175.021	433	194.043	21.1975	C6H10O7	[M-H2O-H]-	Organooxygen compounds	Carbohydrates and carbohydrate conjugates	C00191	Carbohydrate metabolism; Global and overview maps	6556-12-3/528-16-5	HMDB0000127	BioDeepDB	2	neg	369600	328586	784911	543275	1.109e+06	1.2925e+06	741073	341949	274660	374954	547658	732677	769613	373809	789384	551656	350127	399721	242590	369052	719282	333631	618195	444331
M179T338	3-(4-Hydroxyphenyl)pyruvate	179.036	338.4	180.042	6.5685	C9H8O4	[M-H]-	Benzene and substituted derivatives	Phenylpyruvic acid derivatives	C01179	Metabolism of cofactors and vitamins; Biosynthesis of other secondary metabolites; Metabolism of terpenoids and polyketides; Amino acid metabolism; Chemical structure transformation maps; Global and overview maps	156-39-8	HMDB0000707	mzCloud	2	neg	2.56337e+06	326515	1.49648e+06	1.17519e+06	1.7123e+06	1.42873e+06	1.45022e+06	1.57034e+06	1.17914e+06	945696	816252	3.41225e+06	1.64503e+06	1.23439e+06	1.32551e+06	717987	1.61163e+06	1.64646e+06	1.59656e+06	1.1815e+06	906746	1.66209e+06	1.64741e+06	595409
M183T257	2,4-Dinitrophenol	183.006	256.6	184.012	4.78674	C6H4N2O5	[M-H]-	Textile Chemicals/Auxiliary/Dyes; Pesticides/Herbicides; Industrial Chemicals; Endogenous Metabolites		C02496		51-28-5		mzCloud	2	neg	2.45431e+06	557932	543009	2.44647e+06	562393	1.30843e+06	2.53934e+06	3.0745e+06	2.49932e+06	2.37167e+06	2.4583e+06	2.81257e+06	2.8021e+06	2.88585e+06	683951	2.82337e+06	2.73401e+06	737356	2.54914e+06	652258	626522	636935	2.44948e+06	754965
M271T494	16-Hydroxy hexadecanoic acid	271.229	494.4	272.235	3.31823	C16H32O3	[M-H]-	Fatty Acyls	Fatty acids and conjugates	C18218	Lipid metabolism; Global and overview maps	506-13-8	HMDB0006294	BioDeepDB	2	neg	1.27768e+07	1.20583e+07	1.13957e+07	8.51563e+06	1.14953e+07	3.33068e+06	1.28983e+07	1.06682e+07	5.81557e+06	1.22956e+07	7.26569e+06	1.34124e+07	9.58004e+06	7.37573e+06	9.19038e+06	7.10592e+06	1.05201e+07	1.0052e+07	1.20645e+07	1.16959e+07	9.71313e+06	1.15523e+07	9.89795e+06	8.25436e+06
M267T309	Inosine	267.066	308.6	268.081	26.5851	C10H12N4O5	[M-H]-	Purine nucleosides		C00294	Membrane transport; Global and overview maps; Nucleotide metabolism	58-63-9	HMDB0000195	BioDeepDB	2	neg	341649	1.04319e+06	985752	2.04646e+06	839443	1.25714e+06	1.57096e+06	812560	1.17658e+06	903526	1.03341e+06	1.0388e+06	1.09146e+06	935741	745179	856052	802852	2.02306e+06	1.72532e+06	1.03031e+06	773272	793514	792884	893458
M271T368	Naringenin	271.063	368.3	272.068	5.07632	C15H12O5	[M-H]-	Flavonoids	Flavans	C00509	Chemical structure transformation maps; Biosynthesis of other secondary metabolites; Global and overview maps	480-41-1	HMDB0002670	BioDeepDB	2	neg	904628	844509	980732	1.20157e+06	1.31365e+06	930017	1.01075e+06	1.06699e+06	310685	295900	303889	210838	300927	270338	306138	265493	767240	746155	616167	629334	42404.6	38421.5	49952.8	55148.4
M295T473	9,10-Epoxyoctadecenoic acid	295.23	473.1	296.235	6.77438	C18H32O3	[M-H]-	Fatty Acyls	Fatty acids and conjugates	C14825	Lipid metabolism; Global and overview maps		HMDB0004701	BioDeepDB	2	neg	1.0111e+07	6.21472e+06	8.60452e+06	9.28615e+06	6.8765e+06	8.34101e+06	1.73306e+07	1.10375e+07	1.87962e+06	7.90609e+06	2.29458e+06	1.59263e+06	2.73182e+06	4.49578e+06	5.76672e+06	3.79663e+06	1.75348e+07	1.49633e+07	1.39563e+07	1.44506e+07	2.72014e+06	2.04313e+06	1.18815e+07	2.81036e+06
M279T494	Bovinic acid	279.228	493.6	280.24	16.9181	C18H32O2	[M-H]-	Fatty Acyls	Lineolic acids and derivatives	C04056	Lipid metabolism	2540-56-9	HMDB0003797	BioDeepDB	2	neg	1.41468e+07	9.25684e+06	7.04082e+06	1.43531e+07	1.10691e+07	1.25707e+07	1.77452e+07	1.57049e+07	7.27291e+06	1.46468e+07	5.4437e+06	1.02525e+07	1.397e+07	9.74086e+06	1.62687e+07	1.72262e+07	2.37943e+07	1.56496e+07	2.02084e+07	1.36652e+07	1.7907e+07	1.62252e+07	3.81973e+06	1.95471e+07
M283T504	Rhein	283.018	503.7	284.032	24.0267	C15H8O6	[M-H]-	Anthracenes	Anthracenecarboxylic acids and derivatives	C10401		478-43-3	HMDB0032876	BioDeepDB	2	neg	1633.08	1384.39	6.02553e+06	1523.24	1.56311e+06	2205.41	4588.93	1232.37	2.44106e+06	7.67722e+06	5.16468e+06	3.22916e+06	1.10496e+07	3.80429e+06	5.38895e+06	3.472e+06	1845.42	2202.9	570.492	3418.77	1274	2692.07	786.964	1775.74
M293T512	9-OxoODE	293.216	512.4	294.219	11.1727	C18H30O3	[M-H]-	Fatty Acyls	Lineolic acids and derivatives	C14766	Lipid metabolism	54232-59-6	HMDB0004669	BioDeepDB	2	neg	3.19173e+07	1.6132e+07	3.65689e+07	1.82337e+07	2.86454e+07	2.24029e+07	5.58351e+07	2.45083e+07	4.0961e+07	8.66559e+06	2.5576e+07	1.47141e+07	2.14039e+07	6.39264e+06	2.22134e+07	6.2355e+06	1.69713e+07	5.16879e+07	4.63743e+07	4.21203e+07	2.24066e+07	7.84934e+06	3.06473e+07	1.07027e+07
M293T507	13-L-Hydroperoxylinoleic acid	293.215	506.9	312.23	12.2436	C18H32O4	[M-H2O-H]-	Fatty Acyls	Lineolic acids and derivatives	C04717	Lipid metabolism; Global and overview maps	33964-75-9	HMDB0003871	BioDeepDB	2	neg	458027	3.34701e+06	873943	349452	596774	314099	477710	746766	313999	1.8522e+06	269443	334616	435132	1.13146e+06	412370	293707	1.91712e+06	5.51628e+06	1.21681e+06	1.21456e+06	615668	540649	785747	3.61402e+06
M315T521	15-Deoxy-d-12,14-PGJ2	315.197	521.3	316.204	0.634524	C20H28O3	[M-H]-	Fatty Acyls	Eicosanoids	C14717	Lipid metabolism	87893-55-8	HMDB0005079	BioDeepDB	2	neg	879487	798178	849166	929266	590252	692046	1.00288e+06	871806	1.16499e+06	1.45852e+06	1.13603e+06	1.36083e+06	1.14137e+06	1.02525e+06	905627	1.02276e+06	1.46597e+06	1.9962e+06	731354	2.07781e+06	1.86615e+06	1.37343e+06	1.3733e+06	34410.8
M303T481	6beta-Hydroxytestosterone	303.201	481.2	304.204	13.5224	C19H28O3	[M-H]-	Steroids and steroid derivatives	Androstane steroids	C14497		62-99-7	HMDB0006259	BioDeepDB	2	neg	3.76115e+06	4.29661e+06	1.36392e+06	1.10471e+06	3.22993e+06	968051	4.41321e+06	2.32541e+06	9.14852e+06	4.84251e+06	5.99536e+06	2.34702e+06	2.65984e+06	2.51702e+06	1.75185e+06	3.40014e+06	3.65242e+06	801927	1.15358e+06	1.50209e+06	1.65293e+06	1.84363e+06	1.4145e+06	685116
M303T604	Arachidonic acid	303.233	604.4	304.24	0.989337	C20H32O2	[M-H]-	Fatty Acyls	Fatty acids and conjugates	C00219	Circulatory system; Cell growth and death; Nervous system; Sensory system; Endocrine system; Lipid metabolism; Structure-based classification; Immune system; Infectious disease: parasitic; Global and overview maps	506-32-1	HMDB0001043	BioDeepDB	2	neg	4.45859e+07	2.32481e+07	2.14435e+07	9.9337e+06	1.84075e+07	1.76786e+07	5.63371e+07	1.66836e+07	4.99501e+07	5.85102e+07	3.70659e+07	4.38446e+07	1.35139e+07	5.12612e+07	4.45624e+07	3.68795e+07	1.22372e+07	2.41568e+07	1.36218e+07	1.07015e+07	3.84448e+07	7.21329e+07	2.53975e+07	9.12375e+06
M319T531	20-HETE	319.229	531.4	320.235	2.50604	C20H32O3	[M-H]-	Fatty Acyls	Fatty acids and conjugates	C14748	Lipid metabolism; Global and overview maps; Circulatory system	79551-86-3	HMDB0005998	BioDeepDB	2	neg	2.49521e+07	2.64626e+07	1.64461e+07	1.95814e+07	1.82356e+07	1.53119e+07	1.87181e+07	1.82078e+07	2.09102e+07	1.4619e+07	2.08933e+07	1.37668e+07	1.39511e+07	1.43552e+07	1.57569e+07	1.61517e+07	1.26056e+07	1.99316e+07	2.09177e+07	2.03058e+07	1.59619e+07	1.6037e+07	1.38376e+07	1.77066e+07
M319T487	16(R)-HETE	319.229	486.9	320.235	2.81929	C20H32O3	[M-H]-	Fatty Acyls	Eicosanoids	C14778	Lipid metabolism	183509-22-0	HMDB0004680	BioDeepDB	2	neg	1.49019e+06	791574	2.62914e+06	1.10937e+06	1.34014e+06	906989	1.13556e+06	815380	960097	1.63159e+06	924812	794578	805573	829109	1.28562e+06	815605	3.84262e+06	539829	1.63126e+06	2.08881e+06	1.0167e+06	997802	1.34849e+06	1.39925e+06
M325T464	11-Dehydrocorticosterone	325.185	463.8	344.199	14.115	C21H28O4	[M-H2O-H]-	Steroids and steroid derivatives	Hydroxysteroids	C05490	Lipid metabolism	72-23-1	HMDB0004029	BioDeepDB	2	neg	4.62035e+06	6.65415e+06	5.87714e+06	4.0568e+06	5.14693e+06	5.16061e+06	7.56576e+06	8.2247e+06	1.37954e+06	2.21908e+07	1.88008e+06	2.37724e+06	1.29947e+07	1.27643e+06	1.2892e+06	1.21282e+06	1.16491e+07	8.37355e+06	3.98862e+06	3.5766e+06	2.43363e+06	1.89121e+06	1.75112e+07	2.14683e+06
M329T623	Docosapentaenoic acid (22n-3)	329.249	623	330.256	2.35688	C22H34O2	[M-H]-	Fatty Acyls	Fatty acids and conjugates	C16513	Lipid metabolism	24880-45-3	HMDB0006528	BioDeepDB	2	neg	4.45657e+06	3.43804e+06	922813	868017	3.50708e+06	6.51192e+06	5.61098e+06	6.8363e+06	7.18954e+06	5.85964e+06	4.23125e+06	4.90207e+06	7.99981e+06	6.44785e+06	8.11445e+06	8.27345e+06	5.93911e+06	4.04165e+06	3.65534e+06	5.304e+06	3.84194e+06	6.10805e+06	4.87124e+06	4.12973e+06
M331T645	Adrenic acid	331.267	645	332.272	6.94305	C22H36O2	[M-H]-	Fatty Acyls	Fatty acids and conjugates	C16527	Lipid metabolism; Cell growth and death	28874-58-0	HMDB0002226	BioDeepDB	2	neg	2.69116e+06	1.51292e+06	1.79318e+06	2.74792e+06	2.38148e+06	3.67822e+06	3.81135e+06	1.13831e+07	2.14529e+06	1.66187e+06	396170	1.94838e+06	1.71738e+06	1.05731e+06	2.25554e+06	568567	4.02487e+06	3.91639e+06	2.45618e+06	1.06431e+07	3.24726e+06	1.86167e+06	4.19808e+06	1.56906e+06
M345T542	Ginkgoic acid	345.244	541.8	346.251	1.66838	C22H34O3	[M-H]-	Benzene and substituted derivatives	Benzoic acids and derivatives	C10794		22910-60-7	HMDB0033897	BioDeepDB	2	neg	62908.8	20466.8	29388.6	40711.6	152372	137435	217902	141637	2.35658e+06	820948	1.69135e+06	260761	167277	48121.6	37874.6	170537	214151	30719.5	154931	12134.2	69081.7	125984	79567.9	62805.6
M409T479	LysoPA(16_0_0_0)	409.236	479	410.243	0.488715	C19H39O7P	[M-H]-	Glycerophospholipids	Glycerophosphates	C04036			HMDB0007853	BioDeepDB	2	neg	1.27349e+06	721512	354306	331084	3.07748e+06	4.0832e+06	4.5379e+06	4.06944e+06	1.09378e+06	1.19045e+06	3.82012e+06	3.36144e+06	5.37042e+06	3.58475e+06	5.69887e+06	5.01933e+06	5.95325e+06	6.46851e+06	4.13997e+06	5.38925e+06	4.05294e+06	1.66717e+06	6.65054e+06	4.66267e+06
M465T578_2	Cholesterol sulfate	465.305	577.5	466.312	1.88263	C27H46O4S	[M-H]-	Steroids and steroid derivatives	Cholestane steroids	C18043	Lipid metabolism	1256-86-6	HMDB0000653	BioDeepDB	2	neg	7.15052e+08	9.32984e+07	1.55599e+08	3.17479e+07	3.20477e+08	1.7401e+08	2.99714e+08	3.63516e+07	3.7443e+08	7.4318e+07	3.46971e+08	1.71548e+08	1.5225e+08	3.19591e+07	7.21591e+07	1.57287e+08	6.41727e+08	3.88235e+08	4.46767e+08	4.15649e+08	2.13427e+08	2.34227e+08	1.60735e+08	2.48997e+08
M197T529	L-Dopa	196.985	528.9	197.069	12.9164	C9H11NO4	[M]-	Carboxylic acids and derivatives	Amino acids, peptides, and analogues	C00355	Nervous system; Endocrine system; Neurodegenerative disease; Biosynthesis of other secondary metabolites; Amino acid metabolism; Substance dependence; Chemical structure transformation maps; Global and overview maps	59-92-7	HMDB0000181	BioDeepDB	2	neg	3.17199e+06	3.13313e+06	5.51511e+06	4.61977e+06	2.94347e+06	7.42153e+06	4.35353e+06	4.8863e+06	4.42322e+06	4.49884e+06	2.64513e+06	2.81001e+06	2.64944e+06	3.50797e+06	2.60464e+06	5.72998e+06	5.57817e+06	5.05503e+06	4.65575e+06	5.56135e+06	6.32676e+06	4.35412e+06	5.62179e+06	5.1211e+06
M255T343	(2S)-Liquiritigenin	255.073	342.9	256.074	28.1331	C15H12O4	[M-H]-	Flavonoids	Flavans	C09762	Chemical structure transformation maps; Biosynthesis of other secondary metabolites; Global and overview maps	578-86-9	HMDB0029519	MoNA	2	neg	5.42302e+06	4.50969e+06	3.00498e+06	2.13064e+06	2.2679e+06	2.17438e+06	2.15042e+06	3.34201e+06	2.05134e+06	2.00335e+06	1.35678e+06	2.06036e+06	806493	1.88888e+06	2.18841e+06	1.8601e+06	9.10185e+06	5.14746e+06	4.62506e+06	2.13496e+06	2.19175e+06	6.42345e+06	3.28235e+06	1.66726e+06
M271T477	1-(2,6-Dihydroxy-4-methoxyphenyl)-3-phenyl-1-propanone	271.099	476.8	272.105	4.3379	C16H16O4	[M-H]-	Linear 1,3-diarylpropanoids	Chalcones and dihydrochalcones	C09644		35241-55-5	HMDB0034435	MoNA	2	neg	393379	309416	434186	399999	384170	286643	404655	387834	314186	273461	231997	320109	304441	376735	317192	296819	9611.04	23122.4	5137.74	20457.3	117651	14028.2	80649.3	2397.2
M149T342	Benzyl isothiocyanate	149.027	342.5	149.03	18.7885	C8H7NS	[M]-	Benzene and substituted derivatives		C03098		622-78-6	HMDB0033969	MoNA	2	neg	3.49522e+06	3.54361e+06	706089	3.09962e+06	894446	945391	1.49409e+06	4.34076e+06	2.75369e+06	1.82795e+06	2.88841e+06	2.23741e+06	1.20179e+06	4.278e+06	3.33778e+06	3.24988e+06	1.03123e+06	3.26546e+06	6.58169e+06	1.17733e+06	3.05581e+06	3.22649e+06	1.21072e+06	1.00208e+06
M151T289	3-Hydroxyphenylacetic acid	151.041	288.5	152.047	6.16974	C8H8O3	[M-H]-	Phenols	1-hydroxy-4-unsubstituted benzenoids	C05593	Amino acid metabolism; Xenobiotics biodegradation and metabolism; Global and overview maps	621-37-4	HMDB0000440	MoNA	2	neg	1.14402e+06	1.1383e+06	1.0254e+06	980367	1.37386e+06	1.49171e+06	1.48292e+06	1.59312e+06	1.50326e+06	1.44027e+06	1.29197e+06	1.23034e+06	1.94554e+06	1.86108e+06	1.88958e+06	1.94221e+06	1.35389e+06	1.24039e+06	1.35254e+06	1.08827e+06	1.29539e+06	1.50925e+06	1.47095e+06	1.39361e+06
M213T270	Deoxyribose 5-phosphate	213.017	270.2	214.024	1.52101	C5H11O7P	[M-H]-	Organooxygen compounds	Carbohydrates and carbohydrate conjugates	C00673	Carbohydrate metabolism; Global and overview maps	102916-66-5/7685-50-9	HMDB0001031	MoNA	2	neg	805237	630629	1.02603e+06	800030	2.03224e+06	316883	1.67993e+06	1.45984e+06	860280	839069	1.06247e+06	993111	584611	1.94677e+06	1.0852e+06	1.37031e+06	830796	1.23614e+06	1.43429e+06	999217	810382	751493	1.00258e+06	861272
M241T622	Pentadecanoic acid	241.218	622.2	242.225	3.21701	C15H30O2	[M-H]-	Fatty Acyls	Fatty acids and conjugates	C16537		1002-84-2	HMDB0000826	MoNA	2	neg	2.64991e+07	1.44428e+07	1.36731e+07	2.25212e+07	3.3801e+07	3.35317e+07	4.59004e+07	3.49601e+07	1.38777e+07	2.93836e+07	1.8641e+07	1.69867e+07	1.91011e+07	1.95743e+07	2.16098e+07	2.28227e+07	5.48413e+07	4.03371e+07	4.74225e+07	7.22191e+07	3.61166e+07	4.12729e+07	4.13933e+07	4.06826e+07
M317T476	5-KETE	317.212	476.1	318.219	0.554833	C20H30O3	[M-H]-	Fatty Acyls	Fatty acids and conjugates	C14732	Lipid metabolism	126432-17-5/106154-18-1	HMDB0010217	MoNA	2	neg	2.96046e+06	1.56312e+06	2.18445e+06	2.30169e+06	2.05026e+06	2.27259e+06	2.84774e+06	2.4093e+06	2.06051e+06	2.19767e+06	2.50997e+06	2.41395e+06	2.28724e+06	2.42152e+06	2.78025e+06	2.77415e+06	2.32923e+06	2.12634e+06	2.24957e+06	2.18891e+06	3.49861e+06	1.79482e+06	3.09031e+06	1.67588e+06
M335T472	Acebutolol	335.19	472	336.205	22.7453	C18H28N2O4	[M-H]-	Organooxygen compounds	Carbonyl compounds	C06803		37517-30-9	HMDB0015324	MoNA	2	neg	63651.6	58426.6	52269.1	361902	233522	238822	499702	447455	689112	755605	543422	992743	369435	494829	360425	584525	886751	1.09325e+06	387851	1.08278e+06	1.09421e+06	1.08917e+06	826714	503126
M367T685_2	Tetracosanoic acid	367.359	684.9	368.365	3.11745	C24H48O2	[M-H]-	Fatty Acyls	Fatty acids and conjugates	C08320	Lipid metabolism	557-59-5	HMDB0002003	MoNA	2	neg	5.24626e+06	1.82964e+06	3.00522e+06	4.31251e+06	2.65016e+06	4.4921e+06	4.01941e+06	5.06777e+06	3.83816e+06	6.69261e+06	3.82701e+06	3.94994e+06	3.95648e+06	4.58445e+06	5.14888e+06	5.97048e+06	3.36654e+06	1.35704e+06	3.81593e+06	1.32669e+06	1.22348e+06	4.77974e+06	4.44347e+06	5.89688e+06
M369T574_1	Quassin	369.16	574.1	388.189	27.6574	C22H28O6	[M-H2O-H]-	Prenol lipids	Terpene lactones	C08778		76-78-8	HMDB0036587	MoNA	2	neg	2.51825e+07	2.57606e+07	2.10572e+07	1.33007e+07	1.3272e+07	1.03958e+07	4.5531e+06	5.68987e+06	9.5845e+06	1.47013e+06	9.65019e+06	6.60015e+07	1.68546e+07	1.81482e+07	2.17209e+07	1.3508e+07	5.50303e+07	1.9901e+07	6.30276e+06	4.93491e+07	9.01117e+07	1.30245e+07	1.49578e+07	5.54122e+07
M499T444	Perfluorooctanesulfonic acid	498.938	443.5	499.938	15.1843	C8HF17O3S	[M-H]-	Alkyl halides	Alkyl fluorides	C18142		1763-23-1	HMDB0059586	MoNA	2	neg	237100	317681	228496	220997	133712	139403	206777	177391	128659	117968	221083	193660	101963	92887	41238.4	85405	115637	105966	86007.7	120027	127469	227607	52783.6	65207.3
M135T288	o-Toluate	135.046	288.4	136.052	5.74619	C8H8O2	[M-H]-	Benzene and substituted derivatives	Benzoic acids and derivatives	C07215	Xenobiotics biodegradation and metabolism; Global and overview maps	118-90-1	HMDB0002340	mzCloud	2	neg	752052	359258	1.14756e+06	339766	1.22255e+06	355987	570716	473172	462003	413815	644122	609361	531228	406920	417892	337123	481011	566820	432909	441698	453770	482062	516016	674841
M249T296	Citrinin	249.081	295.8	250.084	18.3715	C13H14O5	[M-H]-	Benzopyrans		C16765		518-75-2	HMDB0041857	mzCloud	2	neg	1.7625e+06	2.33512e+06	1.604e+06	1.48348e+06	2.01624e+06	2.02526e+06	1.93063e+06	1.88092e+06	2.94871e+06	2.24469e+06	2.35807e+06	1.76724e+06	1.45913e+06	1.85598e+06	1.62574e+06	1.4361e+06	1.80116e+06	2.81452e+06	1.88642e+06	1.67377e+06	2.01777e+06	1.13872e+06	1.93076e+06	1.95371e+06
M273T325	Phloretin	273.08	324.9	274.084	13.095	C15H14O5	[M-H]-	Linear 1,3-diarylpropanoids	Chalcones and dihydrochalcones	C00774	Biosynthesis of other secondary metabolites; Global and overview maps	60-82-2	HMDB0003306	mzCloud	2	neg	97294.7	104078	462675	125070	1.32968e+06	1.2074e+06	1.44568e+06	1.11147e+06	495429	848000	852009	569390	489343	542397	750999	688119	2.03623e+06	502902	2.1887e+06	2.23444e+06	1.22913e+06	1.63455e+06	1.51584e+06	1.60674e+06
M285T339	Hexadecanedioate	285.208	338.5	286.214	3.77268	C16H30O4	[M-H]-	Fatty Acyls	Fatty acids and conjugates	C19615	Lipid metabolism; Global and overview maps	505-54-4	HMDB0000672	mzCloud	2	neg	3.02997e+06	1.90213e+06	2.24351e+06	1.97131e+06	2.18658e+06	1.69431e+06	3.27562e+06	2.21076e+06	1.74845e+06	4.80566e+06	2.44373e+06	2.18839e+06	2.21612e+06	2.33793e+06	2.7116e+06	2.47798e+06	2.68049e+06	3.61887e+06	2.4121e+06	2.92523e+06	2.82398e+06	2.75886e+06	680063	2.57135e+06
M277T384	2-Ethylhexyl phthalate	277.145	383.5	278.152	1.71751	C16H22O4	[M-H]-	Benzene and substituted derivatives	Benzoic acids and derivatives	C03343		4376-20-9	HMDB0013248	mzCloud	2	neg	2.25941e+06	2.20298e+06	1.48676e+06	5.21446e+06	1.92998e+06	5.7752e+06	1.97751e+06	1.847e+06	2.41457e+06	2.37224e+06	1.90272e+06	1.80436e+06	1.62978e+06	2.10654e+06	1.91358e+06	1.48377e+06	1.40772e+06	2.65931e+06	1.95746e+06	1.71801e+06	1.76346e+06	1.48591e+06	1.98011e+06	2.09732e+06
M313T416	12,13-DHOME	313.24	416	314.246	3.75431	C18H34O4	[M-H]-	Fatty Acyls	Fatty acids and conjugates	C14829	Lipid metabolism		HMDB0004705	mzCloud	2	neg	5.69632e+06	6.56984e+06	1.48062e+06	6.30775e+06	6.09461e+06	5.37938e+06	6.79554e+06	6.78404e+06	6.14836e+06	6.4259e+06	6.62187e+06	6.07675e+06	8.13857e+06	6.32926e+06	5.04618e+06	8.28248e+06	6.08206e+06	9.05342e+06	5.27868e+06	6.73754e+06	5.41119e+06	4.95136e+06	5.99076e+06	7.39051e+06
M301T587	EPA (d5)	301.218	587.3	302.225	3.24017	C20H30O2	[M-H]-	Fatty Acyls	Fatty acids and conjugates	C06428	Lipid metabolism	10417-94-4	HMDB0001999	mzCloud	2	neg	4.80658e+07	3.74616e+07	3.4035e+07	5.36339e+07	3.69124e+07	5.95533e+07	6.45426e+07	5.76267e+07	4.2538e+07	4.53433e+07	5.71125e+07	5.3407e+07	5.21025e+07	4.66723e+07	5.08811e+07	5.36216e+07	9.15668e+07	7.39013e+07	6.91139e+07	6.96072e+07	9.7135e+07	4.57751e+07	6.3754e+07	4.50353e+07
M455T619_1	Ursolic acid	455.353	619.1	456.36	0.386513	C30H48O3	[M-H]-	Prenol lipids	Triterpenoids	C08988		77-52-1	HMDB0002395	mzCloud	2	neg	6.73393e+08	2.38074e+08	5.82352e+08	6.94386e+08	5.04867e+08	9.17832e+08	1.11989e+09	1.19662e+09	6.74331e+08	7.36643e+08	7.34182e+08	1.38951e+09	1.73483e+08	4.82883e+08	2.09192e+08	2.29811e+08	9.19319e+08	1.41436e+09	9.40819e+08	1.40723e+09	7.91331e+08	2.19922e+08	6.16678e+08	9.22996e+08
