# Supplementary material for: Comparative analysis of rhizosphere soil between three plantation types in Karst Rocky Desertification area by widely targeted metabolomics
Source: PeerJ. 2025 Mar 31;13:e19131. doi: 10.7717/peerj.19131 (PMC11967436; doi:10.7717/peerj.19131)
Supplement: Supplemental Information 17 [file peerj-13-19131-s017.xlsx]

## Sheet: raw
ID

## Sheet: normalized
ID
