# Supplementary material for: Comparative analysis of rhizosphere soil between three plantation types in Karst Rocky Desertification area by widely targeted metabolomics
Source: PeerJ. 2025 Mar 31;13:e19131. doi: 10.7717/peerj.19131 (PMC11967436; doi:10.7717/peerj.19131)
Supplement: Supplemental Information 18 [file peerj-13-19131-s018.xlsx]

## Sheet: Sheet1
Comparison	pre	R2X(cum)	R2Y(cum)	Q2(cum)
B vs A	1+1+o	0.393	1	0.783
D vs C	1+1+o	0.408	1	0.786
F vs E	1+1+o	0.475	0.998	0.862
A vs B vs C vs D vs E vs F	1+1+o	0.225	0.992	0.807
