# Supplementary material for: Comparative analysis of rhizosphere soil between three plantation types in Karst Rocky Desertification area by widely targeted metabolomics
Source: PeerJ. 2025 Mar 31;13:e19131. doi: 10.7717/peerj.19131 (PMC11967436; doi:10.7717/peerj.19131)
Supplement: Supplemental Information 19 [file peerj-13-19131-s019.xlsx]

## Sheet: Sheet1
Comparison	pre	R2X(cum)
B vs A	3	0.563
D vs C	3	0.551
F vs E	3	0.624
A vs B vs C vs D vs E vs F	6	0.521
